# Supplementary material for: Chiral gem-difluoroalkyl reagents: gem-difluoroalkyl propargylic borons and gem-difluoroalkyl α-allenols
Source: Royal Society of Chemistry journal article supplement (doi:10.1039/d3sc03266c), 2023-01-01
Supplement: d3sc03266c1.pdf [file d3sc03266c1.pdf]

Supplementary Information for

**Chiral *gem*-Difluoroalkyl Reagent: *gem*-Difluoroalkyl  
Propargylic Boron and *gem*-Difluoroalkyl  $\alpha$ -Allenols**

Hui-Na Zou, Meng-Lin Huang, Ming-Yao Huang, Yu-Xuan Su, Jing-Wei Zhang, Xin-  
Yu Zhang, Shou-Fei Zhu\*

*Frontiers Science Center for New Organic Matter, the State Key Laboratory and  
Institute of Elemento-Organic Chemistry, College of Chemistry, Nankai University,  
Tianjin 300071, China.*

**This PDF file includes:**

Materials and Methods  
Supplementary Text  
Spectral Data  
References

## Table of Contents

|                                                                                            |     |
|--------------------------------------------------------------------------------------------|-----|
| 1. General Information .....                                                               | 3   |
| 2. Preparation and Analytical Data of Substrates.....                                      | 3   |
| 2.1 Synthesis of <i>gem</i> -difluoroalkyl alkynyl <i>N</i> -triflylhydrazones.....        | 3   |
| 2.2 Analytical data of <i>gem</i> -difluoroalkyl alkynyl <i>N</i> -triflylhydrazones ..... | 4   |
| 3. Procedures for B–H Bond Insertion Reaction .....                                        | 16  |
| 3.1 Typical procedures .....                                                               | 16  |
| 3.2 Gram-scale experiment .....                                                            | 17  |
| 4. Scope of Borane Adducts.....                                                            | 17  |
| 5. Analytical Data of B-H Bond Insertion Products.....                                     | 18  |
| 6. The Optimization of the Addition Reaction of Aldehydes with ( <i>R</i> )-3ba .....      | 35  |
| 7. Procedures for Addition Reaction of Aldehydes with ( <i>R</i> )-3ba .....               | 35  |
| 7.1 Procedure A .....                                                                      | 35  |
| 7.2 Procedure B .....                                                                      | 36  |
| 8. Analytical Data of Chiral <i>gem</i> -Difluoroalkyl $\alpha$ -Allenols.....             | 36  |
| 9. Transformations of Chiral <i>gem</i> -Difluoroalkyl $\alpha$ -Allenols.....             | 44  |
| 9.1 Transformation of 5b to 6 .....                                                        | 44  |
| 9.2 Transformation of 6 to 7.....                                                          | 45  |
| 10. X-Ray Diffraction Analysis of ( <i>R</i> )-3fa.....                                    | 46  |
| 11. Confirm Absolute Configurations of ( <i>R</i> , <i>S</i> )-5b by ECD Spectra. ....     | 47  |
| 12. NMR Spectra for New Compounds.....                                                     | 49  |
| 13. HPLC Charts.....                                                                       | 136 |
| 14. ECD Graph Computation .....                                                            | 170 |
| 15. References .....                                                                       | 170 |

## 1. General Information

All reactions and manipulations were performed using standard Schlenk techniques. All solvents were purified and dried using standard procedures.<sup>1</sup> All chiral dirhodium complexes were purchased from Strem or TCI and used as received. The borane adducts **2a** were purchased from J&K and used as received. The other borane adducts **2** were synthesized according to literature procedures.<sup>2</sup>

NMR spectra were recorded with a Bruker AV 400 spectrometer at 400 MHz (<sup>1</sup>H NMR), 101 MHz (<sup>13</sup>C NMR), 151 MHz (<sup>13</sup>C NMR), 128 MHz (<sup>11</sup>B NMR), 376 MHz (<sup>19</sup>F NMR). Chemical shifts ( $\delta$  values) were reported in ppm down field from internal Me<sub>4</sub>Si (<sup>1</sup>H and <sup>13</sup>C NMR). High Resolution Mass Spectra (HRMS) were recorded on an IonSpec FT-ICR mass spectrometer with Electron Spray Ionization (ESI) resource. Melting points were measured on a RY-I apparatus and uncorrected. Enantioselectivities were recorded on Agilent HPLC, using chiral stationary phase columns. The chiral HPLC methods were calibrated with the corresponding racemic mixtures. As for the absolute structure, it was assigned by different methods including X-ray diffraction and circular dichroism. Circular dichroism spectra were measured on a circular dichroism spectrometer (MOS-500).

## 2. Preparation and Analytical Data of Substrates

### 2.1 Synthesis of *gem*-difluoroalkyl alkynyl *N*-triftosylhydrazones

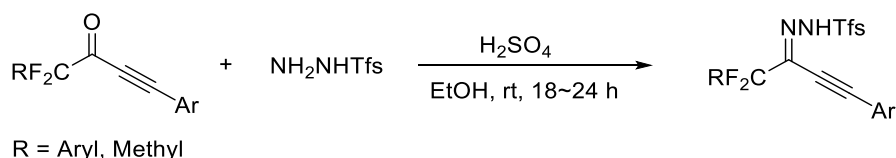

All *gem*-difluoroalkyl alkynyl *N*-triftosylhydrazones were prepared according to the literature.<sup>3</sup>

A 50 mL Schlenk bottle equipped with a magnetic stir bar was charged with 2-(trifluoromethyl)benzenesulfonic acid hydrazide (NH<sub>2</sub>NHTfs, 1.1 equiv) and anhydrous ethanol (4 mL/mmol). Then, concentrated H<sub>2</sub>SO<sub>4</sub> (0.2 mL) was added dropwise into the reaction system. After stirring at room temperature for additional 5 min, the solution became clear and then an ethanol solution (3–5 mL) of alkynyl ketone (1.0 equiv) was injected into the Schlenk bottle. The pale-yellow slurry was stirred at room temperature for 18–24 hours. The solid was isolated by suction filtration and washed with cold water and ethanol and then the white product was obtained.

## 2.2 Analytical data of *gem*-difluoroalkyl alkynyl *N*-triflylhydrazones

### *N'*-(1,1-difluoro-1,4-diphenylbut-3-yn-2-ylidene)-2-(trifluoromethyl)benzenesulfonylhydrazone (1a)

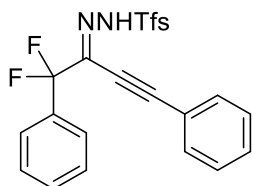

Serial number: zhn-6-38, 59% yield (1.14 g), white solid, melting point: 119–121 °C.

#### <sup>1</sup>H NMR (400 MHz, CDCl<sub>3</sub>)

δ 8.78 (s, 1H), 8.12 (d, *J* = 7.9 Hz, 1H), 7.86 (d, *J* = 7.7 Hz, 1H), 7.74 (t, *J* = 7.6 Hz, 1H), 7.66 (t, *J* = 7.5 Hz, 1H), 7.55 – 7.31 (m, 10H).

#### <sup>13</sup>C NMR (101 MHz, CDCl<sub>3</sub>)

δ 136.1, 134.1 (t, *J* = 36.4 Hz), 133.9 (t, *J* = 25.2 Hz), 133.7, 133.6, 132.4, 132.4, 131.0, 130.4 (t, *J* = 1.8 Hz), 128.8, 128.3 (q, *J* = 7.1 Hz), 128.2, 127.7 (q, *J* = 33.3 Hz), 125.8 (t, *J* = 5.9 Hz), 124.1 (t, *J* = 274.7 Hz), 119.4, 116.5 (t, *J* = 245.4 Hz), 107.1, 74.4.

#### <sup>19</sup>F NMR (376 MHz, CDCl<sub>3</sub>)

δ -58.14, -95.51.

#### HRMS (ESI)

Calcd for [C<sub>23</sub>H<sub>16</sub>F<sub>5</sub>N<sub>2</sub>O<sub>2</sub>S, M + H]<sup>+</sup>: 479.0847, found: 479.0839.

### *N'*-(1,1-difluoro-4-phenyl-1-(*o*-tolyl)but-3-yn-2-ylidene)-2-(trifluoromethyl)benzenesulfonylhydrazone (1b)

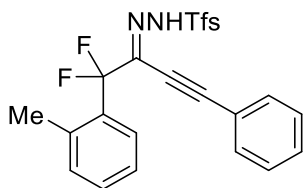

Serial number: zjw-1-65, 92% yield (16.82 g), white solid, melting point: 132–134 °C.

#### <sup>1</sup>H NMR (400 MHz, CDCl<sub>3</sub>)

δ 8.82 (s, 1H), 7.98 (d, *J* = 7.9 Hz, 1H), 7.85 (d, *J* = 7.7 Hz, 1H), 7.72 (t, *J* = 7.4 Hz, 1H), 7.58 (t, *J* = 7.6 Hz, 1H), 7.52 – 7.38 (m, 6H), 7.35 – 7.29 (m, 1H), 7.20 (t, *J* = 7.3 Hz, 1H), 7.06 (d, *J* = 7.6 Hz, 1H), 1.95 (s, 3H).

#### <sup>13</sup>C NMR (101 MHz, CDCl<sub>3</sub>)

δ 136.4 (t, *J* = 3.0 Hz), 136.1, 133.8 (t, *J* = 36.4 Hz), 133.6, 132.5, 132.4, 132.0 (t, *J* = 23.2 Hz), 131.5, 131.0, 130.3, 128.8, 128.2 (q, *J* = 6.3 Hz), 127.6 (q, *J*



= 33.3 Hz), 126.4 (t,  $J = 8.5$  Hz), 125.5, 122.7 (q,  $J = 274.7$  Hz), 119.5, 117.5 (t,  $J = 245.4$  Hz), 107.0, 74.4, 19.7 (t,  $J = 2.7$  Hz).

$^{19}\text{F}$  NMR (376 MHz,  $\text{CDCl}_3$ )

$\delta$  -58.14, -93.57.

HRMS (ESI)

Calcd for  $[\text{C}_{24}\text{H}_{18}\text{F}_5\text{N}_2\text{O}_2\text{S}, \text{M} + \text{H}]^+$ : 493.1004, found: 493.0995.

***N'*-(1,1-difluoro-4-phenyl-1-(*m*-tolyl)but-3-yn-2-ylidene)-2-(trifluoromethyl)benzenesulfonylhydrazone (1c)**

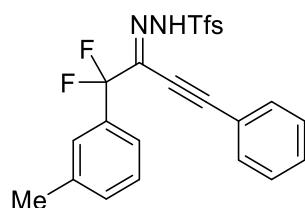

Serial number: zhn-6-52, 54% yield (1.34 g), white solid, melting point: 97–99 °C.

$^1\text{H}$  NMR (400 MHz,  $\text{CDCl}_3$ )

$\delta$  8.80 (s, 1H), 8.16 (d,  $J = 7.9$  Hz, 1H), 7.87 (d,  $J = 7.7$  Hz, 1H), 7.70 (dt,  $J = 28.3, 7.7$  Hz, 2H), 7.58 – 7.35 (m, 5H), 7.28 – 7.11 (m, 4H), 2.34 (s, 3H).

$^{13}\text{C}$  NMR (101 MHz,  $\text{CDCl}_3$ )

$\delta$  138.0, 136.2, 134.0 (q,  $J = 31.1$  Hz), 133.7, 133.5, 132.4, 132.4, 131.2, 131.0, 128.8, 128.3 (q,  $J = 6.6$  Hz), 128.1, 127.7 (q,  $J = 33.3$  Hz), 126.3 (t,  $J = 5.7$  Hz), 123.0 (t,  $J = 5.9$  Hz), 122.7 (q,  $J = 272.7$  Hz), 119.5, 116.5 (t,  $J = 245.4$  Hz), 107.0, 74.5, 21.4.

$^{19}\text{F}$  NMR (376 MHz,  $\text{CDCl}_3$ )

$\delta$  -58.10, -95.50.

HRMS (ESI)

Calcd for  $[\text{C}_{24}\text{H}_{18}\text{F}_5\text{N}_2\text{O}_2\text{S}, \text{M} + \text{H}]^+$ : 493.1004, found: 493.0995.

***N'*-(1-(2-chlorophenyl)-1,1-difluoro-4-phenylbut-3-yn-2-ylidene)-2-(trifluoromethyl)benzenesulfonylhydrazone (1d)**

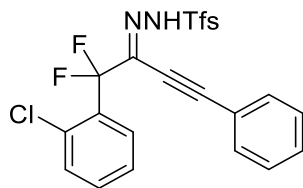

Serial number: hml-1-41, 45% yield (0.69 g), white solid, melting point: 124–127 °C.

$^1\text{H}$  NMR (400 MHz,  $\text{CDCl}_3$ )

$\delta$  8.88 (s, 1H), 7.89 (dd,  $J = 18.5, 7.9$  Hz, 2H), 7.73 (t,  $J = 7.7$  Hz, 1H), 7.65 (dd,  $J = 7.5, 2.0$  Hz, 1H), 7.60 – 7.28 (m, 8H), 7.14 (d,  $J = 7.5$  Hz, 1H).

$^{13}\text{C}$  NMR (101 MHz,  $\text{CDCl}_3$ )

$\delta$  136.3, 133.7, 133.5, 133.5 (t,  $J = 35.4$  Hz), 132.5, 132.4, 132.4, 131.9 (t,  $J = 24.8$  Hz), 131.5, 131.0, 130.5, 128.8, 128.3 (q,  $J = 6.1$  Hz), 128.1 (t,  $J = 8.1$  Hz), 127.8 (q,  $J = 32.3$  Hz), 126.5, 122.8 (q,  $J = 274.7$  Hz), 119.5, 116.0 (t,  $J = 243.5$  Hz), 107.1, 74.2.

$^{19}\text{F}$  NMR (376 MHz,  $\text{CDCl}_3$ )

$\delta$  -58.18, -93.87.

HRMS (ESI)

Calcd for  $[\text{C}_{23}\text{H}_{15}\text{ClF}_5\text{N}_2\text{O}_2\text{S}, \text{M} + \text{H}]^+$ : 513.0457, found: 513.0452.

***N'*-(1-(3-chlorophenyl)-1,1-difluoro-4-phenylbut-3-yn-2-ylidene)-2-(trifluoromethyl)benzenesulfonylhydrazide (1e)**

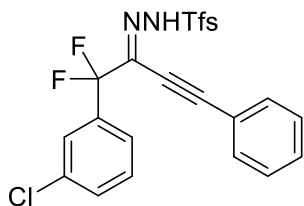

Serial number: zjw-1-88, 37% yield (0.58 g), white solid, melting point: 109–110 °C.

$^1\text{H}$  NMR (400 MHz,  $\text{CDCl}_3$ )

$\delta$  8.80 (s, 1H), 8.10 (d,  $J = 7.8$  Hz, 1H), 7.88 (d,  $J = 7.8$  Hz, 1H), 7.79 – 7.67 (m, 2H), 7.57 – 7.40 (m, 6H), 7.35 – 7.27 (m, 3H).

$^{13}\text{C}$  NMR (101 MHz,  $\text{CDCl}_3$ )

$\delta$  136.0, 135.7 (t,  $J = 27.3$  Hz), 134.2, 133.8, 133.5, 133.5, 133.1, 132.5, 132.4, 131.1, 130.6, 129.6, 128.8, 128.3 (q,  $J = 6.4$  Hz), 127.7 (q,  $J = 33.5$  Hz), 126.2 (t,  $J = 6.0$  Hz), 124.2 (t,  $J = 5.6$  Hz), 122.7 (q,  $J = 273.7$  Hz), 119.3, 116.0 (t,  $J = 245.2$  Hz), 107.4, 74.1.

$^{19}\text{F}$  NMR (376 MHz,  $\text{CDCl}_3$ )

$\delta$  -58.15, -95.30.

HRMS (ESI)

Calcd for  $[\text{C}_{23}\text{H}_{15}\text{ClF}_5\text{N}_2\text{O}_2\text{S}, \text{M} + \text{H}]^+$ : 513.0457, found: 513.0450.

***N'*-(1-(4-chlorophenyl)-1,1-difluoro-4-phenylbut-3-yn-2-ylidene)-2-(trifluoromethyl)benzenesulfonylhydrazone (1f)**

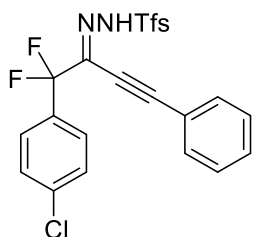

Serial number: hml-1-43, 54% yield (0.84 g), white solid, melting point: 118–121 °C.

**<sup>1</sup>H NMR (400 MHz, CDCl<sub>3</sub>)**

δ 8.76 (s, 1H), 8.02 (d, *J* = 7.6 Hz, 1H), 7.79 (d, *J* = 7.3 Hz, 1H), 7.68 (t, *J* = 6.9 Hz, 1H), 7.60 (t, *J* = 7.4 Hz, 1H), 7.51 – 7.30 (m, 5H), 7.28 – 7.18 (m, 4H).

**<sup>13</sup>C NMR (101 MHz, CDCl<sub>3</sub>)**

δ 136.6, 136.0, 133.8, 133.6 (t, *J* = 37.4 Hz), 133.5, 132.5 (t, *J* = 27.3 Hz), 132.4, 131.1, 128.8, 128.5, 128.3 (q, *J* = 6.1 Hz), 127.7 (q, *J* = 32.3 Hz), 127.4 (t, *J* = 5.9 Hz), 122.7 (q, *J* = 274.7 Hz), 119.3, 116.3 (t, *J* = 246.4 Hz), 107.4, 74.1.

**<sup>19</sup>F NMR (376 MHz, CDCl<sub>3</sub>)**

δ -58.14, -95.22.

**HRMS (ESI)**

Calcd for [C<sub>23</sub>H<sub>15</sub>ClF<sub>5</sub>N<sub>2</sub>O<sub>2</sub>S, M + H]<sup>+</sup>: 513.0457, found: 513.0452.

***N'*-(1,1-difluoro-1-(2-fluorophenyl)-4-phenylbut-3-yn-2-ylidene)-2-(trifluoromethyl)benzenesulfonylhydrazone (1g)**

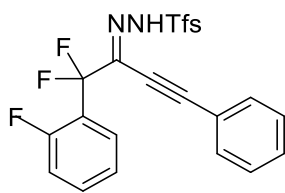

Serial number: zhn-6-84, 34% yield (510 mg), white solid, melting point: 95–97 °C.

**<sup>1</sup>H NMR (400 MHz, CDCl<sub>3</sub>)**

δ 8.85 (s, 1H), 7.98 (d, *J* = 7.9 Hz, 1H), 7.87 (d, *J* = 7.8 Hz, 1H), 7.74 (t, *J* = 7.7 Hz, 1H), 7.66 – 7.35 (m, 8H), 7.18 (t, *J* = 7.6 Hz, 1H), 6.90 (dd, *J* = 10.5, 8.3 Hz, 1H).

**<sup>13</sup>C NMR (101 MHz, CDCl<sub>3</sub>)**

δ 159.7 (dt, *J* = 253.0, 4.2 Hz), 136.0 (d, *J* = 1.4 Hz), 133.7, 133.4, 133.2 (t, *J* = 36.7 Hz), 132.6 (dt, *J* = 8.2, 1.5 Hz), 132.4, 132.3, 131.0, 128.8, 128.3 (q, *J* = 6.3 Hz), 127.7 (q, 32.3 Hz), 127.5 (td, *J* = 6.9, 2.1 Hz), 123.8 (d, *J* = 3.6 Hz),

122.7 (q,  $J = 274.7$  Hz), 121.5 (td,  $J = 38.4, 12.1$  Hz), 119.5, 116.0, 115.8, 115.7 (td,  $J = 242.9, 1.4$  Hz), 107.0, 74.0.

$^{19}\text{F}$  NMR (376 MHz,  $\text{CDCl}_3$ )

$\delta$  -58.21, -93.57 (d,  $J = 10.2$  Hz), -112.38 (t,  $J = 10.2$  Hz).

HRMS (ESI)

Calcd for  $[\text{C}_{23}\text{H}_{15}\text{F}_6\text{N}_2\text{O}_2\text{S}, \text{M} + \text{H}]^+$ : 497.0753, found: 497.0754.

***N'*-(1,1-difluoro-1-(naphthalen-1-yl)-4-phenylbut-3-yn-2-ylidene)-2-(trifluoromethyl)benzenesulfonylhydrazide (1h)**

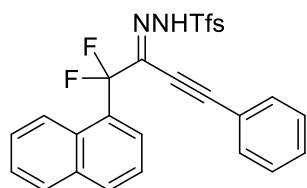

Serial number: zjw-1-94, 73% yield (1.13 g), white solid, melting point: 157–159 °C.

$^1\text{H}$  NMR (400 MHz,  $\text{CDCl}_3$ )

$\delta$  8.83 (s, 1H), 7.91 (d,  $J = 8.3$  Hz, 1H), 7.80 (dd,  $J = 13.0, 7.8$  Hz, 2H), 7.72 – 7.65 (m, 3H), 7.56 – 7.36 (m, 8H), 7.27 (t,  $J = 7.1$  Hz, 1H), 7.18 (t,  $J = 7.8$  Hz, 1H).

$^{13}\text{C}$  NMR (101 MHz,  $\text{CDCl}_3$ )

$\delta$  135.7, 134.0 (t,  $J = 36.4$  Hz), 133.7, 133.5, 133.1, 132.4, 132.0, 131.5, 131.0, 129.5 (t,  $J = 23.6$  Hz), 129.5 (t,  $J = 2.3$  Hz), 128.8, 128.6, 127.9 (q,  $J = 6.4$  Hz), 127.3 (q,  $J = 32.9$  Hz), 126.7, 125.8, 125.3 (t,  $J = 8.8$  Hz), 124.7 (t,  $J = 3.0$  Hz), 124.4, 122.7 (q,  $J = 273.9$  Hz), 119.5, 117.5 (t,  $J = 245.2$  Hz), 107.3, 74.5.

$^{19}\text{F}$  NMR (376 MHz,  $\text{CDCl}_3$ )

$\delta$  -58.19, -91.51.

HRMS (ESI)

Calcd for  $[\text{C}_{27}\text{H}_{18}\text{F}_5\text{N}_2\text{O}_2\text{S}, \text{M} + \text{H}]^+$ : 529.1004, found: 529.1002.

***N'*-(1,1-difluoro-1-(4-nitrophenyl)-4-phenylbut-3-yn-2-ylidene)-2-(trifluoromethyl)benzenesulfonylhydrazide (1i)**

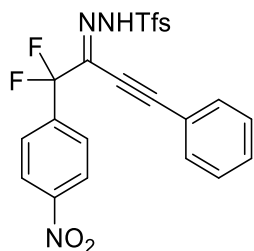

Serial number: zhn-6-39, 66% yield (347 mg), white solid, melting point: 151–152 °C.

<sup>1</sup>H NMR (400 MHz, CDCl<sub>3</sub>)

δ 8.84 (s, 1H), 8.20 (d, *J* = 8.6 Hz, 2H), 8.04 (d, *J* = 7.9 Hz, 1H), 7.88 (d, *J* = 7.7 Hz, 1H), 7.77 (t, *J* = 7.7 Hz, 1H), 7.65 (td, *J* = 7.8, 1.3 Hz, 1H), 7.60 – 7.49 (m, 5H), 7.46 – 7.42 (m, 2H).

<sup>13</sup>C NMR (101 MHz, CDCl<sub>3</sub>)

δ 149.1, 140.1 (t, *J* = 26.5 Hz), 136.0, 133.9, 133.3, 132.8 (t, *J* = 36.4 Hz), 132.4, 132.4, 131.3, 128.9, 128.5 (q, *J* = 6.4 Hz), 127.8 (q, *J* = 33.3 Hz), 127.3 (t, *J* = 5.8 Hz), 123.3, 122.6 (q, *J* = 274.7 Hz), 119.1, 115.9 (t, *J* = 246.4 Hz), 107.8, 73.7.

<sup>19</sup>F NMR (376 MHz, CDCl<sub>3</sub>)

δ -58.20, -95.65.

HRMS (ESI)

Calcd for [C<sub>23</sub>H<sub>15</sub>F<sub>5</sub>N<sub>3</sub>O<sub>4</sub>S, M + H]<sup>+</sup>: 524. 0698, found: 524. 0691.

***N'*-(1,1-difluoro-1,4-di-*o*-tolylbut-3-yn-2-ylidene)-2-(trifluoromethyl)benzenesulfonylhydrazide (1j)**

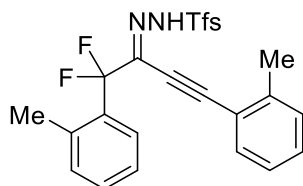

Serial number: zhn-6-145, 94% yield (2.01 g), white solid, melting point: 156–157 °C.

<sup>1</sup>H NMR (400 MHz, CDCl<sub>3</sub>)

δ 8.78 (s, 1H), 8.03 (d, *J* = 7.9 Hz, 1H), 7.86 (d, *J* = 7.8 Hz, 1H), 7.73 (t, *J* = 7.7 Hz, 1H), 7.60 (t, *J* = 7.8 Hz, 1H), 7.49 – 7.46 (m, 2H), 7.40 – 7.30 (m, 2H), 7.28 – 7.18 (m, 3H), 7.07 (d, *J* = 7.5 Hz, 1H), 2.40 (s, 3H), 1.96 (t, *J* = 2.0 Hz, 3H).

<sup>13</sup>C NMR (101 MHz, CDCl<sub>3</sub>)

δ 141.3, 136.4 (t, *J* = 3.2 Hz), 136.2, 133.9 (t, *J* = 36.1 Hz), 133.7, 133.6, 132.9, 132.5, 132.1 (t, *J* = 23.7 Hz), 131.5, 131.1, 130.3, 129.9, 128.2 (q, *J* = 6.3 Hz), 127.7 (q, *J* = 33.3 Hz), 126.4 (t, *J* = 8.5 Hz), 126.1, 125.5, 122.7 (q, *J* = 273.9 Hz), 119.4, 117.4 (t, *J* = 244.4 Hz), 106.1, 78.3, 20.6, 19.6 (t, *J* = 2.6 Hz).

<sup>19</sup>F NMR (376 MHz, CDCl<sub>3</sub>)

δ -58.14, -93.87.

HRMS (ESI)

Calcd for [C<sub>25</sub>H<sub>20</sub>F<sub>5</sub>N<sub>2</sub>O<sub>2</sub>S, M + H]<sup>+</sup>: 507.1160, found: 507.1160.

***N'*-(1,1-difluoro-4-(*m*-tolyl)-1-(*o*-tolyl)but-3-yn-2-ylidene)-2-(trifluoromethyl)benzenesulfonylhydrazone (1k)**

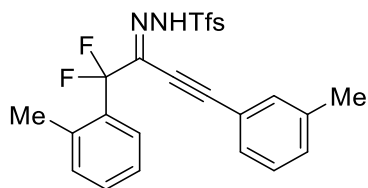

Serial number: zhn-6-82, 79% yield (1.40 g), white solid, melting point: 146–148 °C.

<sup>1</sup>H NMR (400 MHz, CDCl<sub>3</sub>)

δ 8.80 (s, 1H), 7.98 (d, *J* = 7.9 Hz, 1H), 7.86 (d, *J* = 7.7 Hz, 1H), 7.73 (t, *J* = 7.7 Hz, 1H), 7.58 (t, *J* = 7.5 Hz, 1H), 7.45 (d, *J* = 7.8 Hz, 1H), 7.36 – 7.27 (m, 5H), 7.21 (t, *J* = 7.6 Hz, 1H), 7.07 (d, *J* = 7.5 Hz, 1H), 2.37 (s, 3H), 1.95 (s, 3H).

<sup>13</sup>C NMR (101 MHz, CDCl<sub>3</sub>)

δ 138.7, 136.5 (t, *J* = 3.1 Hz), 136.2, 133.9 (t, *J* = 30.3 Hz), 133.7, 133.6, 132.9, 132.5, 132.1 (t, *J* = 23.6 Hz), 131.9, 131.4, 130.3, 129.6, 128.7, 128.2 (q, *J* = 6.3 Hz), 127.7 (q, *J* = 33.0 Hz), 126.4 (t, *J* = 8.5 Hz), 125.5, 122.7 (q, *J* = 274.0 Hz), 119.3, 117.5 (t, *J* = 244.0 Hz), 107.3, 74.1, 21.2, 19.7 (t, *J* = 2.5 Hz).

<sup>19</sup>F NMR (376 MHz, CDCl<sub>3</sub>)

δ -58.18, -93.57.

HRMS (ESI)

Calcd for [C<sub>25</sub>H<sub>20</sub>F<sub>5</sub>N<sub>2</sub>O<sub>2</sub>S, M + H]<sup>+</sup>: 507.1160, found: 507.1162.

***N'*-(1,1-difluoro-1-(*o*-tolyl)-4-(*p*-tolyl)but-3-yn-2-ylidene)-2-(trifluoromethyl)benzenesulfonylhydrazone (1l)**

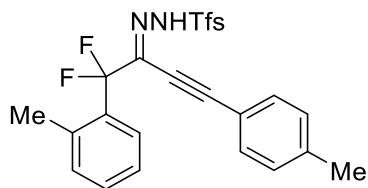

Serial number: zhn-6-83, 92% yield (1.63 g), white solid, melting point: 164–166 °C.

<sup>1</sup>H NMR (400 MHz, CDCl<sub>3</sub>)

δ 8.79 (s, 1H), 7.98 (d, *J* = 7.9 Hz, 1H), 7.85 (d, *J* = 7.8 Hz, 1H), 7.72 (t, *J* = 7.5 Hz, 1H), 7.58 (t, *J* = 7.7 Hz, 1H), 7.48 – 7.37 (m, 3H), 7.32 (t, *J* = 7.4 Hz, 1H), 7.21 (d, *J* = 7.7 Hz, 3H), 7.06 (d, *J* = 7.4 Hz, 1H), 2.40 (s, 3H), 1.95 (s, 3H).

<sup>13</sup>C NMR (101 MHz, CDCl<sub>3</sub>)

$\delta$  141.7, 136.5 (t,  $J = 3.0$  Hz), 136.2, 134.0 (t,  $J = 36.5$  Hz), 133.7, 133.5, 132.5, 132.4, 132.1 (t,  $J = 23.7$  Hz), 131.4, 130.2, 129.6, 128.1 (q,  $J = 6.4$  Hz), 127.7 (q,  $J = 33.3$  Hz), 126.4 (t,  $J = 8.5$  Hz), 125.5, 122.7 (q,  $J = 273.9$  Hz), 117.5 (t,  $J = 233.3$  Hz), 116.4, 107.5, 74.1, 21.8, 19.7 (t,  $J = 2.7$  Hz).

$^{19}\text{F}$  NMR (376 MHz,  $\text{CDCl}_3$ )

$\delta$  -58.18, -93.60.

HRMS (ESI)

Calcd for  $[\text{C}_{25}\text{H}_{20}\text{F}_5\text{N}_2\text{O}_2\text{S}, \text{M} + \text{H}]^+$ : 507.1160, found: 507.1165.

***N'*-(4-(2-chlorophenyl)-1,1-difluoro-1-(*o*-tolyl)but-3-yn-2-ylidene)-2-(trifluoromethyl)benzenesulfonylhydrazone (1m)**

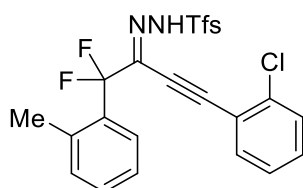

Serial number: zhn-6-89, 89% yield (1.41 g), white solid, melting point: 150–152 °C.

$^1\text{H}$  NMR (400 MHz,  $\text{CDCl}_3$ )

$\delta$  9.14 (s, 1H), 7.98 (d,  $J = 7.5$  Hz, 1H), 7.85 (d,  $J = 7.3$  Hz, 1H), 7.72 (t,  $J = 6.8$  Hz, 1H), 7.62 – 7.27 (m, 7H), 7.25 – 7.16 (m, 1H), 7.08 (d,  $J = 6.8$  Hz, 1H), 1.97 (s, 3H).

$^{13}\text{C}$  NMR (101 MHz,  $\text{CDCl}_3$ )

$\delta$  136.8, 136.5 (t,  $J = 2.3$  Hz), 136.2, 133.7, 133.6, 132.7 (t,  $J = 36.7$  Hz), 132.4, 132.0, 131.9 (t,  $J = 23.6$  Hz), 131.5, 130.3, 129.6, 128.1 (q,  $J = 6.0$  Hz), 127.8 (q,  $J = 33.4$  Hz), 126.9, 126.4 (t,  $J = 8.6$  Hz), 125.5, 122.6 (q,  $J = 273.9$  Hz), 120.0, 117.5 (t,  $J = 244.0$  Hz), 103.3, 79.6, 19.7.

$^{19}\text{F}$  NMR (376 MHz,  $\text{CDCl}_3$ )

$\delta$  -58.05, -93.37.

HRMS (ESI)

Calcd for  $[\text{C}_{24}\text{H}_{17}\text{ClF}_5\text{N}_2\text{O}_2\text{S}, \text{M} + \text{H}]^+$ : 527.0614, found: 527.0611.

***N'*-(4-(3-chlorophenyl)-1,1-difluoro-1-(*o*-tolyl)but-3-yn-2-ylidene)-2-(trifluoromethyl)benzenesulfonylhydrazone (1n)**

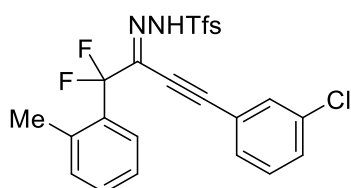

Serial number: zhn-6-88, 87% yield (1.17 g), white solid, melting point: 147–150 °C.

<sup>1</sup>H NMR (400 MHz, CDCl<sub>3</sub>)

δ 8.82 (s, 1H), 8.00 (d, *J* = 7.9 Hz, 1H), 7.89 (d, *J* = 7.8 Hz, 1H), 7.76 (t, *J* = 7.7 Hz, 1H), 7.62 (t, *J* = 7.7 Hz, 1H), 7.53 (t, *J* = 1.8 Hz, 1H), 7.50 – 7.42 (m, 3H), 7.41 – 7.32 (m, 2H), 7.24 (t, *J* = 7.6 Hz, 1H), 7.10 (d, *J* = 7.5 Hz, 1H), 1.97 (s, 3H).

<sup>13</sup>C NMR (101 MHz, CDCl<sub>3</sub>)

δ 136.4 (t, *J* = 3.1 Hz), 136.0, 134.8, 133.7, 133.7, 133.1 (t, *J* = 36.7 Hz), 132.5, 132.1, 131.9 (t, *J* = 23.6 Hz), 131.5, 131.2, 130.5, 130.4, 130.1, 128.2 (q, *J* = 6.2 Hz), 127.7 (q, *J* = 33.3 Hz), 126.4 (t, *J* = 8.5 Hz), 125.5, 122.7 (q, *J* = 274.1 Hz), 121.1, 117.5 (t, *J* = 243.9 Hz), 104.9, 75.1, 19.7 (t, *J* = 2.7 Hz).

<sup>19</sup>F NMR (376 MHz, CDCl<sub>3</sub>)

δ -58.17, -93.48.

HRMS (ESI)

Calcd for [C<sub>24</sub>H<sub>17</sub>ClF<sub>5</sub>N<sub>2</sub>O<sub>2</sub>S, M + H]<sup>+</sup>: 527.0614, found: 527.0610.

***N*'-(4-(4-chlorophenyl)-1,1-difluoro-1-(*o*-tolyl)but-3-yn-2-ylidene)-2-(trifluoromethyl)benzenesulfonylhydrazone (1o)**

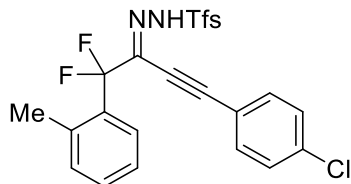

Serial number: zhn-6-87, 92% yield (1.46 g), white solid, melting point: 187–189 °C.

<sup>1</sup>H NMR (400 MHz, CDCl<sub>3</sub>)

δ 8.78 (s, 1H), 8.03 – 7.29 (m, 10H), 7.28 – 7.00 (m, 2H), 1.94 (s, 3H).

<sup>13</sup>C NMR (101 MHz, CDCl<sub>3</sub>)

δ 137.4, 136.5, 136.1, 133.7, 133.6, 133.6, 133.4 (t, *J* = 36.6 Hz), 132.5, 131.9 (t, *J* = 24.1 Hz), 131.5, 130.3, 129.3, 128.2 (q, *J* = 6.9 Hz), 127.7 (q, *J* = 32.8 Hz), 126.4 (t, *J* = 8.5 Hz), 125.5, 122.7 (q, *J* = 275.1 Hz), 117.9, 117.5 (t, *J* = 243.1 Hz), 105.5, 75.2, 19.7.

<sup>19</sup>F NMR (376 MHz, CDCl<sub>3</sub>)

δ -58.17, -93.48.

HRMS (ESI)

Calcd for [C<sub>24</sub>H<sub>17</sub>ClF<sub>5</sub>N<sub>2</sub>O<sub>2</sub>S, M + H]<sup>+</sup>: 527.0614, found: 527.0610.



***N'*-1,1-difluoro-4-(3-fluorophenyl)-1-(*o*-tolyl)but-3-yn-2-ylidene)-2-(trifluoromethyl)benzenesulfonylhydrazide (1p)**

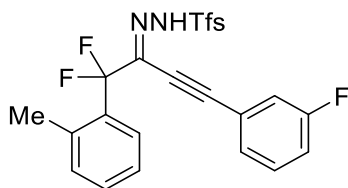

Serial number: zhn-6-191, 82% yield (1.45 g), white solid, melting point: 146–148 °C.

$^1\text{H}$  NMR (400 MHz,  $\text{CDCl}_3$ )

$\delta$  8.80 (s, 1H), 7.98 (d,  $J = 8.0$  Hz, 1H), 7.87 (d,  $J = 7.8$  Hz, 1H), 7.74 (t,  $J = 7.7$  Hz, 1H), 7.60 (t,  $J = 7.8$  Hz, 1H), 7.47 – 7.30 (m, 4H), 7.25 – 7.15 (m, 3H), 7.08 (d,  $J = 7.5$  Hz, 1H), 1.95 (s, 3H).

$^{13}\text{C}$  NMR (101 MHz,  $\text{CDCl}_3$ )

$\delta$  163.5, 161.0, 136.4 (t,  $J = 2.8$  Hz), 136.0, 133.7, 133.2 (t,  $J = 36.8$  Hz), 132.5, 131.9 (t,  $J = 23.6$  Hz), 131.5, 130.6 (d,  $J = 8.5$  Hz), 130.4, 128.4, 128.4, 128.2 (q,  $J = 6.1$  Hz), 127.7 (q,  $J = 33.2$  Hz), 126.4 (t,  $J = 8.5$  Hz), 125.5, 122.7 (q,  $J = 274.2$  Hz), 121.2 (d,  $J = 9.2$  Hz), 119.1 (d,  $J = 23.6$  Hz), 118.5 (d,  $J = 21.0$  Hz), 117.5 (t,  $J = 243.7$  Hz), 105.0 (d,  $J = 3.6$  Hz), 74.9, 19.7.

$^{19}\text{F}$  NMR (376 MHz,  $\text{CDCl}_3$ )

$\delta$  -58.18, -93.52, -111.24.

HRMS (ESI)

Calcd for  $[\text{C}_{24}\text{H}_{17}\text{F}_6\text{N}_2\text{O}_2\text{S}, \text{M} + \text{H}]^+$ : 511.0909, found: 511.0907.

***N'*-(1,1-difluoro-1-(*o*-tolyl)-4-(4-(trifluoromethyl)phenyl)but-3-yn-2-ylidene)-2-(trifluoromethyl)benzenesulfonylhydrazide (1q)**

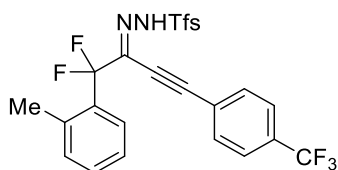

Serial number: zhn-8-45, 88% yield (702 mg), white solid, melting point: 179–182 °C.

$^1\text{H}$  NMR (400 MHz,  $\text{THF-d}_8$ )

$\delta$  11.24 (s, 1H), 7.94 (d,  $J = 7.8$  Hz, 1H), 7.87 – 7.79 (m, 6H), 7.64 (t,  $J = 7.7$  Hz, 1H), 7.46 (d,  $J = 7.8$  Hz, 1H), 7.39 (t,  $J = 7.5$  Hz, 1H), 7.25 (t,  $J = 7.6$  Hz, 1H), 7.16 (d,  $J = 7.6$  Hz, 1H), 2.02 (s, 3H).

$^{13}\text{C}$  NMR (151 MHz,  $\text{THF-d}_8$ )

$\delta$  136.9, 136.5 (t,  $J = 3.2$  Hz), 133.6, 133.5, 132.7, 132.5, 132.4 (t,  $J = 23.5$  Hz), 131.5 (t,  $J = 30.2$  Hz), 131.4, 130.1, 130.0 (t,  $J = 36.9$  Hz), 127.9 (q,  $J = 6.4$  Hz), 127.3 (q,  $J = 33.3$  Hz), 126.0 (t,  $J = 8.4$  Hz), 125.5 (q,  $J = 3.7$  Hz), 125.3, 124.6, 123.9 (q,  $J = 271.8$  Hz), 122.8 (q,  $J = 286.9$  Hz), 118.3 (t,  $J = 242.7$  Hz), 102.0, 77.3, 19.1 (t,  $J = 2.5$  Hz).

$^{19}\text{F}$  NMR (376 MHz, THF- $d_8$ )

$\delta$  -60.40, -65.71, -95.34.

HRMS (ESI)

Calcd for  $[\text{C}_{25}\text{H}_{17}\text{F}_8\text{N}_2\text{O}_2\text{S}, \text{M} + \text{H}]^+$ : 561.0878, found: 561.0876.

***N'*-(1,1-difluoro-4-(naphthalen-1-yl)-1-(*o*-tolyl)but-3-yn-2-ylidene)-2-(trifluoromethyl)benzenesulfonylhydrazide (1r)**

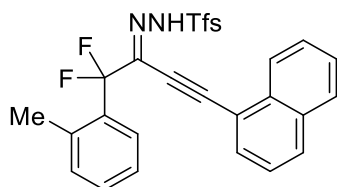

Serial number: zhn-6-189, 85% yield (2.01 g), white solid, melting point: 201–203 °C.

$^1\text{H}$  NMR (400 MHz, THF- $d_6$ )

$\delta$  11.10 (s, 1H), 8.12 (d,  $J = 8.3$  Hz, 1H), 8.06 – 7.84 (m, 5H), 7.79 (t,  $J = 7.9$  Hz, 1H), 7.69 – 7.47 (m, 5H), 7.38 (t,  $J = 7.5$  Hz, 1H), 7.26 (t,  $J = 7.7$  Hz, 1H), 7.15 (d,  $J = 7.6$  Hz, 1H), 2.04 (s, 3H).

$^{13}\text{C}$  NMR (101 MHz, THF- $d_6$ )

135.3, 134.7 (t,  $J = 3.2$  Hz), 131.7, 131.5, 131.3, 131.1, 130.7 (q,  $J = 23.2$  Hz), 130.6, 130.3, 129.6, 129.2, 128.2, 126.5, 126.0 (q,  $J = 6.4$  Hz), 125.6, 125.5 (q,  $J = 33.3$  Hz), 124.9, 124.2 (t,  $J = 8.6$  Hz), 123.5, 123.5, 123.2, 121.0 (q,  $J = 273.9$  Hz), 116.4 (t,  $J = 243.4$  Hz), 116.0, 100.7, 78.4, 17.2 (t,  $J = 2.5$  Hz).

$^{19}\text{F}$  NMR (376 MHz, THF- $d_6$ )

$\delta$  -60.34, -95.55.

HRMS (ESI)

Calcd for  $[\text{C}_{28}\text{H}_{20}\text{F}_5\text{N}_2\text{O}_2\text{S}, \text{M} + \text{H}]^+$ : 543.1160, found: 543.1159.

***N'*-(1,1-difluoro-4-(thiophen-2-yl)-1-(*o*-tolyl)but-3-yn-2-ylidene)-2-(trifluoromethyl)benzenesulfonylhydrazone (1s)**

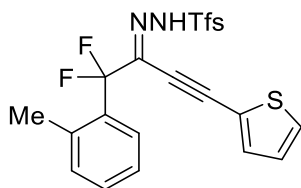

Serial number: zhn-6-90, 78% yield (1.17 g), white solid, melting point: 129–131 °C.

$^1\text{H}$  NMR (400 MHz,  $\text{CDCl}_3$ )

$\delta$  8.78 (s, 1H), 7.97 (d,  $J = 7.9$  Hz, 1H), 7.86 (d,  $J = 7.8$  Hz, 1H), 7.76 – 7.66 (m, 2H), 7.59 (t,  $J = 7.7$  Hz, 1H), 7.44 (d,  $J = 7.7$  Hz, 1H), 7.40 – 7.29 (m, 2H), 7.24 – 7.15 (m, 2H), 7.07 (d,  $J = 7.6$  Hz, 1H), 1.95 (s, 3H).

$^{13}\text{C}$  NMR (101 MHz,  $\text{CDCl}_3$ )

$\delta$  136.5 (t,  $J = 3.0$  Hz), 136.1, 133.8 (t,  $J = 36.7$  Hz), 133.7, 133.6, 133.1, 132.5, 132.0 (t,  $J = 23.6$  Hz), 131.4, 130.3, 129.7, 128.2 (q,  $J = 6.5$  Hz), 127.6 (q,  $J = 33.2$  Hz), 126.6, 126.4 (t,  $J = 8.5$  Hz), 125.5, 122.7 (q,  $J = 273.9$  Hz), 118.6, 117.5 (t,  $J = 244.1$  Hz), 102.1, 74.5, 19.7 (t,  $J = 2.5$  Hz).

$^{19}\text{F}$  NMR (376 MHz,  $\text{CDCl}_3$ )

$\delta$  -58.15, -93.44.

HRMS (ESI)

Calcd for  $[\text{C}_{22}\text{H}_{16}\text{F}_5\text{N}_2\text{O}_2\text{S}_2, \text{M} + \text{H}]^+$ : 499.0568, found: 499.0564.

***N'*-(4,4-difluoro-1-(naphthalen-1-yl)pent-1-yn-3-ylidene)-2-(trifluoromethyl)benzenesulfonylhydrazone (1t)**

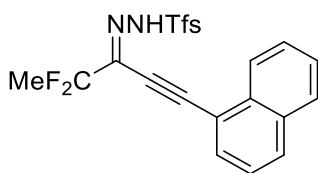

Serial number: zhn-7-123, 82% yield (306 mg), yellow solid, melting point: 106–108 °C.

$^1\text{H}$  NMR (400 MHz,  $\text{CDCl}_3$ )

$\delta$  8.94 (s, 1H), 8.42 – 8.36 (m, 1H), 8.20 (d,  $J = 8.3$  Hz, 1H), 7.99 (d,  $J = 8.3$  Hz, 1H), 7.93 – 7.90 (m, 2H), 7.87 – 7.74 (m, 3H), 7.69 – 7.48 (m, 3H), 1.83 (t,  $J = 18.3$  Hz, 3H).

$^{13}\text{C}$  NMR (101 MHz,  $\text{CDCl}_3$ )

$\delta$  136.4, 133.9, 133.8 (t,  $J = 35.8$  Hz), 133.2, 133.1, 132.9, 132.6, 132.5, 131.8, 128.7, 128.6 (q,  $J = 6.3$  Hz), 128.0, 127.9 (q,  $J = 33.2$  Hz), 127.1, 125.4, 125.2, 122.8 (q,  $J = 274.0$  Hz), 118.6 (t,  $J = 238.0$  Hz), 117.1, 105.2, 78.6, 21.4 (t,  $J = 25.8$  Hz).

$^{19}\text{F}$  NMR (376 MHz,  $\text{CDCl}_3$ )

$\delta$  -58.07, -89.13.

HRMS (ESI)

Calcd for  $[\text{C}_{22}\text{H}_{15}\text{F}_5\text{N}_2\text{O}_2\text{SNa}, \text{M}+\text{Na}]^+$ : 489.0667, found: 489.0667.

### 3. Procedures for B–H Bond Insertion Reaction

#### 3.1 Typical procedures

##### Procedure A:

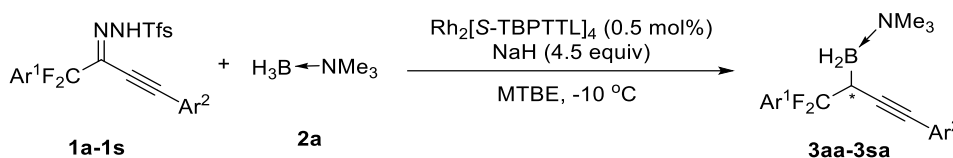

*gem*-Difluoroalkyl alkynyl *N*-trifosylhydrazones **1a** (71.7 mg, 0.15 mmol, 1.5 equiv), trimethylamine borane adduct **2a** (7.3 mg, 0.1 mmol),  $\text{Rh}_2(\text{S-TBPTTL})_4$  (**4d**, 1.3 mg, 0.0005 mmol, 0.5 mol%), and NaH (10.8 mg, 0.45 mmol, 4.5 equiv) were charged into a 25 mL Schlenk tube under argon atmosphere. After the mixture was cooled to  $-10\text{ }^\circ\text{C}$ , 2.5 mL dry MTBE was injected into the tube. At this temperature, the reaction was kept stirring for 24 h. Then the reaction system was concentrated and purified by a flash chromatography on silica gel to give **3aa** as light yellow oil (30.9 mg, 99% yield, 93% ee). Serial number: zhn-6-36.

##### Procedure B:

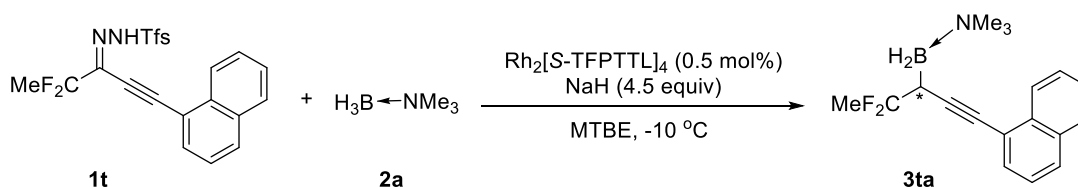

*gem*-Difluoroalkyl alkynyl *N*-trifosylhydrazones **1t** (69.9 mg, 0.15 mmol, 1.5 equiv), trimethylamine borane adduct **2a** (7.3 mg, 0.1 mmol),  $\text{Rh}_2(\text{S-TFPTTL})_4$  (**4b**, 0.8 mg, 0.0005 mmol, 0.5 mol%), and NaH (10.8 mg, 0.45 mmol, 4.5 equiv) were charged into a 25 mL Schlenk tube under argon atmosphere. After the mixture was cooled to  $-10\text{ }^\circ\text{C}$ , 2.5 mL dry MTBE was injected into the tube. At this temperature, the reaction

was kept stirring for 24 h. Then the reaction system was concentrated and purified by a flash chromatography on silica gel to give **3ta** as yellow oil (26.0 mg, 86% yield, 73% ee). Serial number: zhn-7-129.

### 3.2 Gram-scale experiment

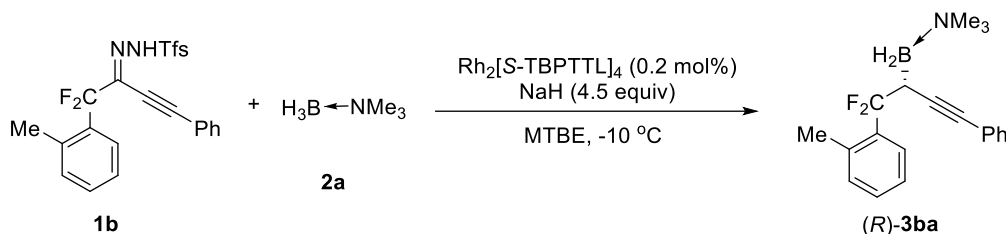

*gem*-Difluoroalkyl alkynyl *N*-triflylhydrazones **1b** (2.58 g, 5.24 mmol, 1.5 equiv), trimethylamine borane adduct **2a** (256 mg, 3.50 mmol, 1.0 equiv), and NaH (378 mg, 15.75 mmol, 4.5 equiv) were charged into an oven-dried 200 mL Schlenk tube under argon atmosphere. After the mixture was cooled to -10 °C, 75 mL dry MTBE was injected into the Schlenk tube by syringe. Rh<sub>2</sub>(S-TBPTTL)<sub>4</sub> (**4d**, 18.7 mg, 0.007 mmol, 0.2 mol%) dissolved in 5 mL dry MTBE were injected into the Schlenk tube by a syringe. At this temperature, the reaction was kept stirring for 40 h. Then the reaction system was concentrated and purified by a flash chromatography on silica gel to give (*R*)-**3ba** as light yellow solid (0.87 g, 76% yield, 96% ee). Serial number: zhn-6-155.

## 4. Scope of Borane Adducts

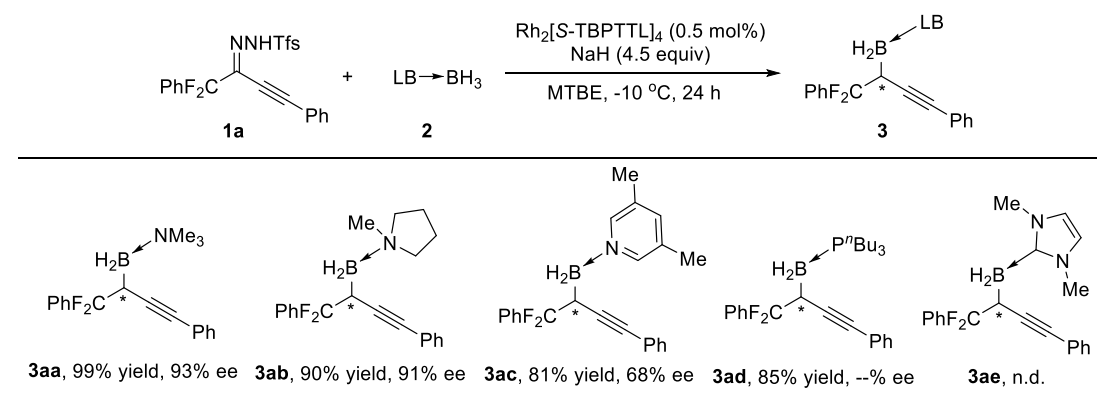

Note: due to the small polarity of **3ad**, the ee value is difficult to measure.

## 5. Analytical Data of B-H Bond Insertion Products

### (-)-Trimethylamine-(1,1-difluoro-1,4-diphenylbut-3-yn-2-yl)borane (3aa)

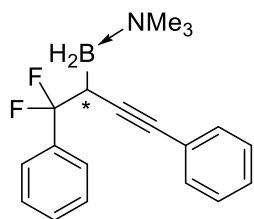

Serial number: zhn-6-36, Light yellow oil, 99% yield (30.9 mg), 93% ee.  $[\alpha]_D^{24}$  -41.6 (*c* 1.0, CHCl<sub>3</sub>). TLC  $R_f$  = 0.50 (PE/EA = 3:1, v/v).

#### <sup>1</sup>H NMR (400 MHz, CDCl<sub>3</sub>)

$\delta$  7.68 – 7.59 (m, 2H), 7.43 – 7.29 (m, 5H), 7.29 – 7.16 (m, 3H), 2.80 – 2.54 (m, 10H).

#### <sup>13</sup>C NMR (101 MHz, CDCl<sub>3</sub>)

$\delta$  138.1 (t, *J* = 27.4 Hz), 131.2, 128.8, 128.1, 127.4, 127.1, 126.1 (t, *J* = 6.2 Hz), 124.7, 124.2 (t, *J* = 245.8 Hz), 93.5 (dd, *J* = 10.9, 5.5 Hz), 82.7, 52.7.

#### <sup>11</sup>B NMR (128 MHz, CDCl<sub>3</sub>)

$\delta$  -3.98.

#### <sup>19</sup>F NMR (376 MHz, CDCl<sub>3</sub>)

$\delta$  -86.63 (d, *J* = 231.7 Hz), -89.72 (d, *J* = 231.6 Hz).

#### HRMS (ESI)

Calcd for [C<sub>19</sub>H<sub>22</sub>BF<sub>2</sub>NK, M+K]<sup>+</sup>: 352.1445, found: 352.1449.

HPLC condition: Chiralcel AD-H column, *n*-hexane/*i*-PrOH = 90:10, flow rate = 1.0 mL/min, 254 nm UV detector,  $t_R$  = 6.22 min (major) and  $t_R$  = 7.56 min (minor).

### (-)-1-methylpyrrolidine-(1,1-difluoro-1,4-diphenylbut-3-yn-2-yl)borane (3ab)

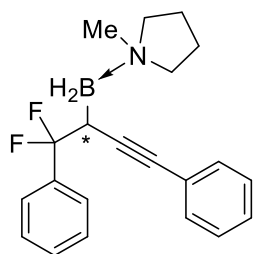

Serial number: zhn-6-58, Colorless oil, 90% yield (30.7 mg), 91% ee.  $[\alpha]_D^{24}$  -40.0 (*c* 0.5, CHCl<sub>3</sub>). TLC  $R_f$  = 0.28 (PE/EA = 5:1, v/v).

#### <sup>1</sup>H NMR (400 MHz, CDCl<sub>3</sub>)

$\delta$  7.68 – 7.58 (m, 2H), 7.41 – 7.31 (m, 5H) 7.29 – 7.19 (m, 3H), 3.42 – 3.35 (m, 1H), 3.27 – 3.20 (m, 1H), 2.95 – 2.81 (m, 2H), 2.79 – 2.74 (m, 1H), 2.67 (s, 3H), 2.10 – 1.86 (m, 4H).

$^{13}\text{C}$  NMR (101 MHz,  $\text{CDCl}_3$ )

$\delta$  138.3 (t,  $J = 27.4$  Hz), 131.2, 128.8 (t,  $J = 1.4$  Hz), 128.1, 127.4, 127.0, 126.1 (t,  $J = 6.2$  Hz), 124.9, 124.4 (t,  $J = 246.0$  Hz), 82.5, 62.3, 61.8, 48.3, 22.7, 22.2.

$^{11}\text{B}$  NMR (128 MHz,  $\text{CDCl}_3$ )

$\delta$  -5.03 (t,  $J = 106.3$  Hz).

$^{19}\text{F}$  NMR (376 MHz,  $\text{CDCl}_3$ )

$\delta$  -87.22 (d,  $J = 231.8$  Hz), -89.48 (d,  $J = 231.5$  Hz).

HRMS (ESI)

Calcd for  $[\text{C}_{21}\text{H}_{24}\text{BF}_2\text{NK}, \text{M}+\text{K}]^+$ : 378.1601, found: 378.1605.

HPLC condition: Chiralcel AD-H column, *n*-hexane/*i*-PrOH = 90:10, flow rate = 1.0 mL/min, 254 nm UV detector,  $t_{\text{R}} = 7.61$  min (major) and  $t_{\text{R}} = 9.23$  min (minor).

**(+)-3,5-dimethylpyridine-(1,1-difluoro-1,4-diphenylbut-3-yn-2-yl)borane (3ac)**

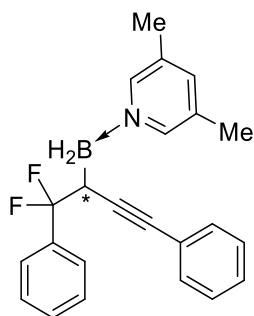

Serial number: hml-1-65, Light yellow oil, 81% yield (29.2 mg), 68% ee.  $[\alpha]_{\text{D}}^{26} +4.0$  (*c* 0.5,  $\text{CHCl}_3$ ). TLC  $R_f = 0.70$  (PE/EA = 3:1, v/v).

$^1\text{H}$  NMR (400 MHz,  $\text{CDCl}_3$ )

$\delta$  8.25 (s, 2H), 7.64 – 7.58 (m, 2H), 7.54 (s, 1H), 7.41 – 7.34 (m, 3H), 7.21 (s, 5H), 2.96 – 2.83 (m, 1H), 2.29 (s, 6H).

$^{13}\text{C}$  NMR (101 MHz,  $\text{CDCl}_3$ )

$\delta$  145.4, 141.3, 138.7 (t,  $J = 27.5$  Hz), 134.7, 131.1, 128.9, 128.0, 127.6, 127.0, 125.8 (t,  $J = 6.2$  Hz), 124.7, 124.5 (t,  $J = 245.0$  Hz), 92.3 (dd,  $J = 8.0$  Hz), 83.8, 18.3.

$^{11}\text{B}$  NMR (128 MHz,  $\text{CDCl}_3$ )

$\delta$  -6.54.

$^{19}\text{F}$  NMR (376 MHz,  $\text{CDCl}_3$ )

$\delta$  -58.24, -89.67.

### HRMS (ESI)

Calcd for  $[C_{23}H_{22}BF_2NK, M+K]^+$ : 400.1445, found: 400.1447.

HPLC condition: Chiralcel AD-H column, *n*-hexane/*i*-PrOH = 90:10, flow rate = 1.0 mL/min, 254 nm UV detector,  $t_R$  = 6.64 min (minor) and  $t_R$  = 9.20 min (major).

### **(-)-tributylphosphane-(1,1-difluoro-1,4-diphenylbut-3-yn-2-yl)borane (3ad)**

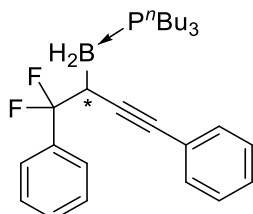

Serial number: zhn-6-61, Light yellow oil, 85% yield (38.9 mg), --% ee.  $[\alpha]_D^{24}$  -55.0 (*c* 1.0, CHCl<sub>3</sub>). TLC  $R_f$  = 0.65 (PE/EA = 50:1, v/v). Note: due to the small polarity of **3ad**, the ee value is difficult to measure.

### <sup>1</sup>H NMR (400 MHz, CDCl<sub>3</sub>)

$\delta$  7.56 – 7.54 (m, 2H), 7.31 – 7.29 (m, 3H), 7.23 – 7.21 (m, 2H), 7.17 – 7.13 (m, 3H), 2.77 – 2.63 (m, 1H), 1.61 – 1.55 (m, 6H), 1.40 – 1.30 (m, 6H), 1.28 – 1.18 (m, 6H), 0.79 (t,  $J$  = 7.2 Hz, 9H).

### <sup>13</sup>C NMR (101 MHz, CDCl<sub>3</sub>)

$\delta$  138.1 (t,  $J$  = 27.6 Hz), 131.1, 128.8, 128.1, 127.4, 127.0, 126.2 (t,  $J$  = 6.2 Hz), 124.7, 124.5 (t,  $J$  = 229.3 Hz), 93.6 – 93.3 (m), 82.1, 24.5, 24.5, 24.5, 24.4, 21.2, 20.8, 13.6.

### <sup>11</sup>B NMR (128 MHz, CDCl<sub>3</sub>)

$\delta$  -29.27 (t,  $J$  = 89.2 Hz).

### <sup>19</sup>F NMR (376 MHz, CDCl<sub>3</sub>)

-90.51, 90.56.

### HRMS (ESI)

Calcd for  $[C_{28}H_{40}BF_2PK, M+K]^+$ : 495.2560, found: 495.2563.

### **(+)-(R)-Trimethylamine-(1,1-difluoro-4-phenyl-1-(*o*-tolyl)but-3-yn-2-yl)borane (3ba)**

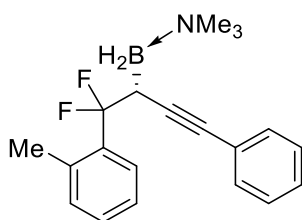



Serial number: zhn-6-67, Yellow oil, 99% yield (32.4 mg), 99% ee.  $[\alpha]_{\text{D}}^{25} +18.0$  (*c* 1.0,  $\text{CHCl}_3$ ). TLC  $R_f = 0.29$  (PE/EA = 5:1, v/v). The absolute configuration of (*R*)-**3ba** was inferred from (*R*)-**3fa**.

$^1\text{H}$  NMR (400 MHz,  $\text{CDCl}_3$ )

$\delta$  7.62 (dd,  $J = 7.6, 1.5$  Hz, 1H), 7.33 – 7.27 (m, 2H), 7.27 – 7.14 (m, 6H), 2.84 – 2.71 (m, 1H), 2.68 (s, 9H), 2.54 (s, 3H).

$^{13}\text{C}$  NMR (101 MHz,  $\text{CDCl}_3$ )

$\delta$  136.5 (t,  $J = 25.7$  Hz), 135.5, 131.5, 131.3, 128.8, 128.1, 127.7 (t,  $J = 8.3$  Hz), 127.1, 125.5 (t,  $J = 252.5$  Hz), 124.8, 93.5 (t,  $J = 7.0$  Hz), 82.6, 52.7, 20.9 (t,  $J = 4.0$  Hz).

$^{11}\text{B}$  NMR (128 MHz,  $\text{CDCl}_3$ )

$\delta$  -4.12.

$^{19}\text{F}$  NMR (376 MHz,  $\text{CDCl}_3$ )

$\delta$  -85.27 (d,  $J = 240.3$  Hz), -88.31 (d,  $J = 240.3$  Hz).

HRMS (ESI)

Calcd for  $[\text{C}_{20}\text{H}_{24}\text{BF}_2\text{NK}, \text{M}+\text{K}]^+$ : 366.1601, found: 366.1604.

HPLC condition: Chiralcel AD-H column, *n*-hexane/*i*-PrOH = 90:10, flow rate = 1.0 mL/min, 254 nm UV detector,  $t_{\text{R}} = 6.30$  min (major) and  $t_{\text{R}} = 7.09$  min (minor).

**(-)-Trimethylamine-(1,1-difluoro-4-phenyl-1-(*m*-tolyl)but-3-yn-2-yl)borane (3ca)**

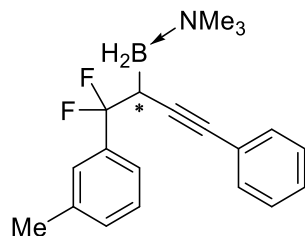

Serial number: zhn-6-66, Yellow oil, 99% yield (32.5 mg), 89% ee.  $[\alpha]_{\text{D}}^{25} -30.1$  (*c* 1.0,  $\text{CHCl}_3$ ). TLC  $R_f = 0.29$  (PE/EA = 5:1, v/v).

$^1\text{H}$  NMR (400 MHz,  $\text{CDCl}_3$ )

$\delta$  7.47 – 7.40 (m, 2H), 7.35 – 7.29 (m, 2H), 7.28 – 7.21 (m, 4H), 7.17 (d,  $J = 7.5$  Hz, 1H), 2.78 – 2.69 (m, 1H), 2.67 (s, 9H), 2.37 (s, 3H).

$^{13}\text{C}$  NMR (101 MHz,  $\text{CDCl}_3$ )

$\delta$  138.1 (t,  $J = 27.2$  Hz), 136.9, 131.2, 129.6, 128.1, 127.3, 127.1, 126.8 (t,  $J = 6.2$  Hz), 124.8, 124.3 (t,  $J = 242.4$  Hz), 123.2 (t,  $J = 6.2$  Hz), 93.7 (dd,  $J = 10.2, 6.0$  Hz), 82.8, 52.8, 21.6.

$^{11}\text{B}$  NMR (128 MHz,  $\text{CDCl}_3$ )

$\delta$  -3.68 (t,  $J$  = 105.9 Hz).

$^{19}\text{F}$  NMR (376 MHz,  $\text{CDCl}_3$ )

$\delta$  -86.56 (d,  $J$  = 231.4 Hz), -89.56 (d,  $J$  = 231.1 Hz).

HRMS (ESI)

Calcd for  $[\text{C}_{20}\text{H}_{24}\text{BF}_2\text{NNa}, \text{M}+\text{Na}]^+$ : 350.1862, found: 350.1871.

HPLC condition: Chiralcel AD-H column, *n*-hexane/*i*-PrOH = 90:10, flow rate = 1.0 mL/min, 254 nm UV detector,  $t_{\text{R}}$  = 6.24 min (major) and  $t_{\text{R}}$  = 7.10 min (minor).

**(+)-Trimethylamine-(1-(2-chlorophenyl)-1,1-difluoro-4-phenylbut-3-yn-2-yl)borane (3da)**

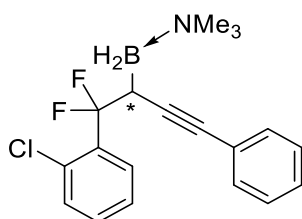

Serial number: zhn-6-71, Yellow oil, 74% yield (25.6 mg), 92% ee.  $[\alpha]_{\text{D}}^{25}$  +24.0 (*c* 0.5  $\text{CHCl}_3$ ). TLC  $R_f$  = 0.31 (PE/EA = 5:1, v/v).

$^1\text{H}$  NMR (400 MHz,  $\text{CDCl}_3$ )

$\delta$  7.73 – 7.66 (m, 1H), 7.41 – 7.39 (m, 1H), 7.31 – 7.29 (m, 4H), 7.25 – 7.19 (m, 4H), 3.32 – 3.16 (m, 1H), 2.69 (s, 9H).

$^{13}\text{C}$  NMR (101 MHz,  $\text{CDCl}_3$ )

$\delta$  135.0 (t,  $J$  = 27.1 Hz), 130.3, 129.7, 129.1, 128.0 (t,  $J$  = 9.3 Hz), 127.0, 126.0, 125.0, 123.7, 122.4 (t,  $J$  = 247.3 Hz), 92.0 (dd,  $J$  = 7.6, 3.2 Hz), 81.5, 51.6.

$^{11}\text{B}$  NMR (128 MHz,  $\text{CDCl}_3$ )

$\delta$  -3.86.

$^{19}\text{F}$  NMR (376 MHz,  $\text{CDCl}_3$ )

$\delta$  -87.70 (d,  $J$  = 240.5 Hz), -94.87 (d,  $J$  = 240.5 Hz).

HRMS (ESI)

Calcd for  $[\text{C}_{19}\text{H}_{21}\text{BCIF}_2\text{NK}, \text{M}+\text{K}]^+$ : 386.1055, found: 386.1060.

HPLC condition: Chiralcel AD-H column, *n*-hexane/*i*-PrOH = 90:10, flow rate = 1.0 mL/min, 254 nm UV detector,  $t_{\text{R}}$  = 7.15 min (major) and  $t_{\text{R}}$  = 7.97 min (minor).

**(-)-Trimethylamine-(1-(3-chlorophenyl)-1,1-difluoro-4-phenylbut-3-yn-2-yl)borane (3ea)**

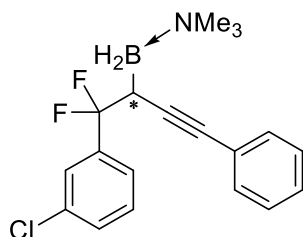

Serial number: zhn-6-74, Light yellow oil, 83% yield (28.7 mg), 87% ee.  $[\alpha]_{\text{D}}^{25}$  -4.0 (*c* 0.5,  $\text{CHCl}_3$ ). TLC  $R_f$  = 0.32 (PE/EA = 5:1, v/v).

$^1\text{H}$  NMR (400 MHz,  $\text{CDCl}_3$ )

$\delta$  7.58 (s, 1H), 7.44 (d,  $J$  = 7.5 Hz, 1H), 7.29 – 7.16 (m, 7H), 2.68 – 2.64 (m, 1H), 2.61 (s, 9H).

$^{13}\text{C}$  NMR (101 MHz,  $\text{CDCl}_3$ )

$\delta$  139.9 (t,  $J$  = 27.9 Hz), 133.4, 131.2, 129.0, 128.7, 128.1, 127.2, 126.7 (t,  $J$  = 6.4 Hz), 124.5, 124.4 (t,  $J$  = 6.2 Hz), 123.5 (t,  $J$  = 246.3 Hz), 93.0 (dd,  $J$  = 11.1, 5.6 Hz), 83.1, 52.8.

$^{11}\text{B}$  NMR (128 MHz,  $\text{CDCl}_3$ )

$\delta$  -3.85 (t,  $J$  = 109.3 Hz).

$^{19}\text{F}$  NMR (376 MHz,  $\text{CDCl}_3$ )

$\delta$  -85.67 (d,  $J$  = 231.7 Hz), -91.31 (d,  $J$  = 232.2 Hz).

HRMS (ESI)

Calcd for  $[\text{C}_{19}\text{H}_{21}\text{BClF}_2\text{NK}, \text{M}+\text{K}]^+$ : 386.1055, found: 386.1063.

HPLC condition: Chiralcel AD-H column, *n*-hexane/*i*-PrOH = 90:10, flow rate = 1.0 mL/min, 254 nm UV detector,  $t_{\text{R}}$  = 5.64 min (major) and  $t_{\text{R}}$  = 6.72 min (minor).

**(-)-(R)-Trimethylamine-(1-(4-chlorophenyl)-1,1-difluoro-4-phenylbut-3-yn-2-yl)borane (3fa)**

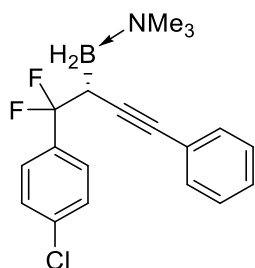

Serial number: zhn-6-72, White solid, melting point: 111–113 °C, 97% yield (33.8 mg), 90% ee.  $[\alpha]_{\text{D}}^{25}$  -57.8 (*c* 1.0,  $\text{CHCl}_3$ ). TLC  $R_f$  = 0.32 (PE/EA = 5:1, v/v).

$^1\text{H}$  NMR (400 MHz,  $\text{CDCl}_3$ )

$\delta$  7.52 – 7.48 (m, 2H), 7.29 – 7.23 (m, 4H), 7.19 – 7.16 (m, 3H), 7.71 – 2.55 (m, 10H).

$^{13}\text{C}$  NMR (101 MHz,  $\text{CDCl}_3$ )

$\delta$  136.6 (t,  $J = 28.2$  Hz), 134.9, 131.2, 128.2, 127.7 (t,  $J = 6.2$  Hz), 127.6, 127.3, 124.6, 123.9 (t,  $J = 246.3$  Hz), 93.1 (dd,  $J = 12.1, 5.1$  Hz), 82.9, 52.8.

$^{11}\text{B}$  NMR (128 MHz,  $\text{CDCl}_3$ )

$\delta$  -3.70.

$^{19}\text{F}$  NMR (376 MHz,  $\text{CDCl}_3$ )

$\delta$  -85.04 (d,  $J = 232.0$  Hz), -90.59 (d,  $J = 231.6$  Hz).

HRMS (ESI)

Calcd for  $[\text{C}_{19}\text{H}_{21}\text{BClF}_2\text{NK}, \text{M}+\text{K}]^+$ : 386.1055, found: 386.1062.

HPLC condition: Chiralcel AD-H column, *n*-hexane/*i*-PrOH = 90:10, flow rate = 1.0

mL/min, 254 nm UV detector,  $t_{\text{R}} = 6.04$  min (major) and  $t_{\text{R}} = 7.14$  min (minor).

**(+)-Trimethylamine-(1,1-difluoro-1-(2-fluorophenyl)-4-phenylbut-3-yn-2-yl)borane (3ga)**

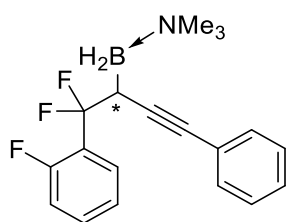

Serial number: zhn-6-99, White solid, melting point: 92–94 °C, 98% yield (32.4 mg), 95% ee.  $[\alpha]_{\text{D}}^{26} +22.4$  (*c* 1.0,  $\text{CHCl}_3$ ). TLC  $R_{\text{f}} = 0.30$  (PE/EA = 5:1, v/v).

$^1\text{H}$  NMR (400 MHz,  $\text{CDCl}_3$ )

$\delta$  7.61 (t,  $J = 7.7$  Hz, 1H), 7.40 – 7.20 (m, 6H), 7.16 (t,  $J = 7.6$  Hz, 1H), 7.07 (dd,  $J = 11.2, 8.3$  Hz, 1H), 3.01 – 2.86 (m, 1H), 2.67 (s, 9H).

$^{13}\text{C}$  NMR (101 MHz,  $\text{CDCl}_3$ )

$\delta$  159.3 (dt,  $J = 249.9, 4.2$  Hz), 131.3, 130.9 (d,  $J = 8.5$  Hz), 128.5 – 128.3 (m), 128.0, 127.1, 126.1 (td,  $J = 28.2, 11.4$  Hz), 124.7, 123.3 (d,  $J = 3.4$  Hz), 123.0 (td,  $J = 245.9, 2.9$  Hz), 115.9 (d,  $J = 22.3$  Hz), 93.0 – 92.8 (m), 82.6, 52.7.

$^{11}\text{B}$  NMR (128 MHz,  $\text{CDCl}_3$ )

$\delta$  -3.79.

$^{19}\text{F}$  NMR (376 MHz,  $\text{CDCl}_3$ )

$\delta$  -85.78 (dd,  $J = 242.1, 11.4$  Hz), -94.11 (dd,  $J = 241.5, 12.7$  Hz), -114.63 (t,  $J = 12.1$  Hz).

### HRMS (ESI)

Calcd for  $[C_{19}H_{21}BF_3NNa, M+Na]^+$ : 354.1611, found: 354.1608.

HPLC condition: Chiralcel AD-H column, *n*-hexane/*i*-PrOH = 90:10, flow rate = 1.0 mL/min, 254 nm UV detector,  $t_R$  = 6.61 min (major) and  $t_R$  = 7.63 min (minor).

### **(+)-Trimethylamine-(1,1-difluoro-1-(naphthalen-1-yl)-4-phenylbut-3-yn-2-yl)borane (3ha)**

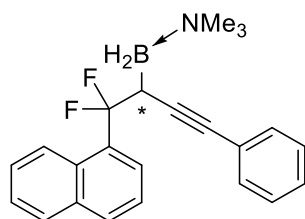

Serial number: zhn-6-96, Light yellow oil, 99% yield (36.0 mg), 97% ee.  $[\alpha]_D^{26} +130.6$  (*c* 1.0,  $CHCl_3$ ). TLC  $R_f$  = 0.45 (PE/EA = 5:1, v/v).

### $^1H$ NMR (400 MHz, $CDCl_3$ )

$\delta$  8.42 (d,  $J$  = 8.5 Hz, 1H), 7.87 – 7.84 (m, 3H), 7.54 – 7.45 (m, 3H), 7.34 – 7.27 (m, 2H), 7.26 – 7.18 (m, 3H), 3.13 – 2.98 (m, 1H), 2.60 (s, 9H).

### $^{13}C$ NMR (101 MHz, $CDCl_3$ )

$\delta$  134.1, 133.8 (t,  $J$  = 25.1 Hz), 131.3, 130.1, 129.8, 128.8, 128.0, 127.1, 126.2, 125.8 (t,  $J$  = 9.1 Hz), 125.5 (t,  $J$  = 4.7 Hz), 125.3 (t,  $J$  = 247.5 Hz), 125.3, 124.8, 124.3, 93.5 (dd,  $J$  = 6.5, 6.5 Hz), 83.0, 52.6.

### $^{11}B$ NMR (128 MHz, $CDCl_3$ )

$\delta$  -3.70.

### $^{19}F$ NMR (376 MHz, $CDCl_3$ )

$\delta$  -82.71 (d,  $J$  = 240.2 Hz), -88.88 (d,  $J$  = 240.8 Hz).

### HRMS (ESI)

Calcd for  $[C_{23}H_{24}BF_2NNa, M+Na]^+$ : 386.1862, found: 386.1866.

HPLC condition: Chiralcel IC-3 column, *n*-hexane/*i*-PrOH = 95:5, flow rate = 1.0 mL/min, 254 nm UV detector,  $t_R$  = 11.35 min (major) and  $t_R$  = 19.75 min (minor).

**(-)-Trimethylamine-(1,1-difluoro-1-(4-nitrophenyl)-4-phenylbut-3-yn-2-yl)borane (3ia)**

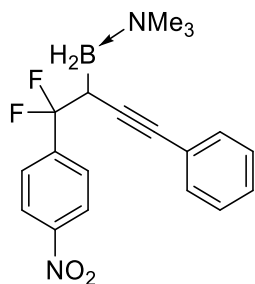

Serial number: zhn-6-68, Light yellow oil, 80% yield (28.6 mg), 82% ee.  $[\alpha]_D^{26} -77.2$  (*c* 1.0, CHCl<sub>3</sub>). TLC  $R_f = 0.25$  (PE/EA = 3:1, v/v).

<sup>1</sup>H NMR (400 MHz, CDCl<sub>3</sub>)

$\delta$  8.15 (d, *J* = 8.5 Hz, 2H), 7.73 (d, *J* = 8.5 Hz, 2H), 7.27 – 7.14 (m, 5H), 2.73 – 2.65 (m, 1H), 2.61 (s, 9H).

<sup>13</sup>C NMR (101 MHz, CDCl<sub>3</sub>)

$\delta$  148.2, 144.3 (t, *J* = 28.1 Hz), 131.2, 128.3, 127.6, 127.5, 124.2, 123.3 (t, *J* = 252.5 Hz), 122.6, 92.4 (dd, *J* = 12.5, 5.3 Hz), 83.3 (d, *J* = 1.8 Hz), 52.8.

<sup>11</sup>B NMR (128 MHz, CDCl<sub>3</sub>)

$\delta$  -4.22.

<sup>19</sup>F NMR (376 MHz, CDCl<sub>3</sub>)

$\delta$  -85.31 (d, *J* = 232.7 Hz), -92.57 (d, *J* = 232.9 Hz).

HRMS (ESI)

Calcd for [C<sub>19</sub>H<sub>21</sub>BF<sub>2</sub>N<sub>2</sub>O<sub>2</sub>Na, M+Na]<sup>+</sup>: 381.1556, found: 381.1557.

HPLC condition: Chiralcel AD-H column, *n*-hexane/*i*-PrOH = 90:10, flow rate = 1.0 mL/min, 254 nm UV detector,  $t_R = 10.28$  min (major) and  $t_R = 12.67$  min (minor).

**(+)-Trimethylamine-(1,1-difluoro-1,4-di-*o*-tolylbut-3-yn-2-yl)borane (3ja)**

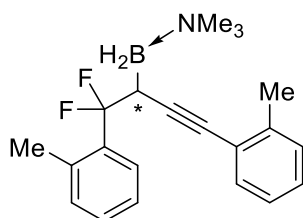

Serial number: zhn-6-151, Light yellow oil, 94% yield (32.0 mg), 98% ee.  $[\alpha]_D^{27} +5.2$  (*c* 1.0, CHCl<sub>3</sub>). TLC  $R_f = 0.39$  (PE/EA = 5:1, v/v).

<sup>1</sup>H NMR (400 MHz, CDCl<sub>3</sub>)

$\delta$  7.57 (d,  $J = 7.6$  Hz, 1H), 7.19 – 6.95 (m, 7H), 2.78 – 2.67 (m, 1H), 2.59 (s, 9H), 2.45 (t,  $J = 2.6$  Hz, 3H), 2.25 (s, 3H).

$^{13}\text{C}$  NMR (101 MHz,  $\text{CDCl}_3$ )

$\delta$  140.0, 136.5 (t,  $J = 25.8$  Hz), 135.5 (t,  $J = 2.3$  Hz), 131.5, 131.5, 129.2, 128.9, 127.8 (t,  $J = 8.2$  Hz), 127.1, 125.5 (t,  $J = 242.4$  Hz), 125.3, 124.9, 124.6, 97.5 (t,  $J = 7.3$  Hz), 81.4, 52.7, 20.9 (t,  $J = 4.1$  Hz), 20.8.

$^{11}\text{B}$  NMR (128 MHz,  $\text{CDCl}_3$ )

$\delta$  -3.58 (t,  $J = 105.5$  Hz).

$^{19}\text{F}$  NMR (376 MHz,  $\text{CDCl}_3$ )

$\delta$  -85.51 (d,  $J = 241.6$  Hz), -87.95 (d,  $J = 241.5$  Hz).

HRMS (ESI)

Calcd for  $[\text{C}_{21}\text{H}_{26}\text{BF}_2\text{NNa}, \text{M}+\text{Na}]^+$ : 364.2019, found: 364.2027.

HPLC condition: Chiralcel AD-H column, *n*-hexane/*i*-PrOH = 98:2, flow rate = 1.0

mL/min, 254 nm UV detector,  $t_{\text{R}} = 10.42$  min (major) and  $t_{\text{R}} = 11.16$  min (minor).

**(+)-Trimethylamine-(1,1-difluoro-4-(*m*-tolyl)-1-(*o*-tolyl)but-3-yn-2-yl)borane (3ka)**

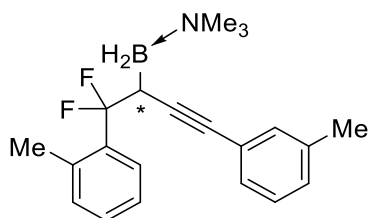

Serial number: zhn-6-97, Yellow oil, 82% yield (27.9 mg), 98% ee.  $[\alpha]_{\text{D}}^{25} +18.2$  (*c* 1.0,  $\text{CHCl}_3$ ). TLC  $R_f = 0.34$  (PE/EA = 5:1, v/v).

$^1\text{H}$  NMR (400 MHz,  $\text{CDCl}_3$ )

$\delta$  7.61 (dd,  $J = 7.7, 1.6$  Hz, 1H), 7.27 – 7.08 (m, 6H), 7.04 – 7.01 (m, 1H), 2.86 – 2.74 (m, 1H), 2.68 (s, 9H), 2.54 (s, 3H), 2.28 (s, 3H).

$^{13}\text{C}$  NMR (101 MHz,  $\text{CDCl}_3$ )

$\delta$  137.7, 136.5 (t,  $J = 25.8$  Hz), 135.5, 131.9, 131.4, 128.8, 128.3, 128.0, 127.7 (t,  $J = 8.6$  Hz), 125.5 (t,  $J = 252.5$  Hz), 124.8, 124.6 (t,  $J = 246.44$  Hz), 93.1 – 93.0 (m), 82.8, 52.8, 21.2, 20.9 (t,  $J = 4.1$  Hz).

$^{11}\text{B}$  NMR (128 MHz,  $\text{CDCl}_3$ )

$\delta$  -4.00.

$^{19}\text{F}$  NMR (376 MHz,  $\text{CDCl}_3$ )

$\delta$  -85.10 (d,  $J$  = 240.1 Hz), -88.35 (d,  $J$  = 240.2 Hz).

**HRMS (ESI)**

Calcd for  $[\text{C}_{21}\text{H}_{26}\text{BF}_2\text{NNa}, \text{M}+\text{Na}]^+$ : 364.2019, found: 364.2026.

**HPLC condition:** Chiralcel AD-H column, *n*-hexane/*i*-PrOH = 90:10, flow rate = 1.0 mL/min, 254 nm UV detector,  $t_{\text{R}}$  = 5.07 min (major) and  $t_{\text{R}}$  = 5.46 min (minor).

**(+)-Trimethylamine-(1,1-difluoro-1-(*o*-tolyl)-4-(*p*-tolyl)but-3-yn-2-yl)borane (3la)**

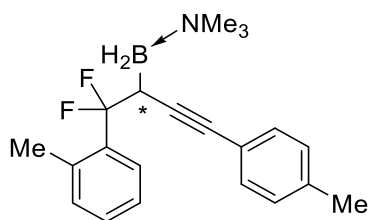

Serial number: zhn-6-98, Yellow oil, 80% yield (27.4 mg), 98% ee.  $[\alpha]_{\text{D}}^{21} +15.5$  (*c* 0.5,  $\text{CHCl}_3$ ). TLC  $R_f$  = 0.33 (PE/EA = 5:1, v/v).

**$^1\text{H}$  NMR (400 MHz,  $\text{CDCl}_3$ )**

$\delta$  7.61 (d,  $J$  = 7.7 Hz, 1H), 7.25 – 7.15 (m, 5H), 7.04 (d,  $J$  = 7.8 Hz, 2H), 2.86 – 2.73 (m, 1H), 2.68 (s, 9H), 2.53 (s, 3H), 2.30 (s, 3H).

**$^{13}\text{C}$  NMR (101 MHz,  $\text{CDCl}_3$ )**

$\delta$  137.0, 136.6 (t,  $J$  = 25.7 Hz), 135.5 (t,  $J$  = 2.5 Hz), 131.4, 131.2, 128.8, 128.8, 127.7 (t,  $J$  = 8.7 Hz), 125.5 (t,  $J$  = 242.4 Hz), 124.8, 121.7, 92.6 (t,  $J$  = 7.1 Hz), 82.7, 52.8, 21.4, 20.9 (t,  $J$  = 4.1 Hz).

**$^{11}\text{B}$  NMR (128 MHz,  $\text{CDCl}_3$ )**

$\delta$  -3.93.

**$^{19}\text{F}$  NMR (376 MHz,  $\text{CDCl}_3$ )**

$\delta$  -85.35 (d,  $J$  = 239.9 Hz), -88.32 (d,  $J$  = 239.8 Hz).

**HRMS (ESI)**

Calcd for  $[\text{C}_{21}\text{H}_{26}\text{BF}_2\text{NNa}, \text{M}+\text{Na}]^+$ : 364.2019, found: 364.2026.

**HPLC condition:** Chiralcel AD-H column, *n*-hexane/*i*-PrOH = 90:10, flow rate = 1.0 mL/min, 254 nm UV detector,  $t_{\text{R}}$  = 6.20 min (major) and  $t_{\text{R}}$  = 6.84 min (minor).



**(+)-Trimethylamine-(4-(2-chlorophenyl)-1,1-difluoro-1-(*o*-tolyl)but-3-yn-2-yl)borane (3ma)**

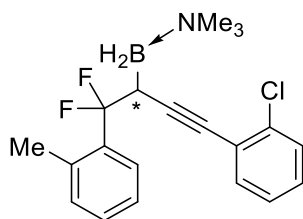

Serial number: zhn-6-104, Colorless oil, 97% yield (34.9 mg), 98% ee.  $[\alpha]_{\text{D}}^{27} +19.6$  ( $c$  1.0,  $\text{CHCl}_3$ ). TLC  $R_f = 0.34$  (PE/EA = 5:1, v/v).

$^1\text{H}$  NMR (400 MHz,  $\text{CDCl}_3$ )

$\delta$  7.58 (d,  $J = 7.8$  Hz, 1H), 7.30 – 7.01 (m, 7H), 2.83 – 2.70 (m, 1H), 2.63 (s, 9H), 2.47 – 2.46 (m, 3H).

$^{13}\text{C}$  NMR (101 MHz,  $\text{CDCl}_3$ )

$\delta$  136.4, 135.5, 135.3, 133.3, 131.5, 128.9, 128.9, 128.0, 127.7 (t,  $J = 8.5$  Hz), 126.3, 125.3 (t,  $J = 252.5$  Hz), 124.9, 124.5, 99.3 (t,  $J = 7.2$  Hz), 79.7, 52.8, 20.9.

$^{11}\text{B}$  NMR (128 MHz,  $\text{CDCl}_3$ )

$\delta$  -3.56.

$^{19}\text{F}$  NMR (376 MHz,  $\text{CDCl}_3$ )

$\delta$  -85.26 (d,  $J = 241.3$  Hz), -88.02 (d,  $J = 241.4$  Hz).

HRMS (ESI)

Calcd for  $[\text{C}_{20}\text{H}_{23}\text{BCIF}_2\text{NNa}, \text{M}+\text{Na}]^+$ : 384.1472, found: 384.1469.

HPLC condition: Chiralcel IC-3 column, *n*-hexane/*i*-PrOH = 98:2, flow rate = 1.0 mL/min, 254 nm UV detector,  $t_{\text{R}} = 12.42$  min (major) and  $t_{\text{R}} = 14.63$  min (minor).

**(+)-Trimethylamine-(4-(3-chlorophenyl)-1,1-difluoro-1-(*o*-tolyl)but-3-yn-2-yl)borane (3na)**

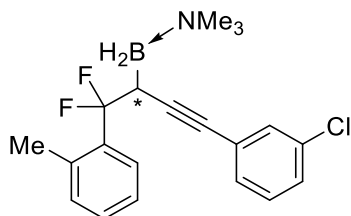

Serial number: zhn-6-103, Colorless oil, 98% yield (35.2 mg), 98% ee.  $[\alpha]_{\text{D}}^{27} +18.6$  ( $c$  1.0,  $\text{CHCl}_3$ ). TLC  $R_f = 0.35$  (PE/EA = 5:1, v/v).

$^1\text{H}$  NMR (400 MHz,  $\text{CDCl}_3$ )

$\delta$  7.60 (d,  $J = 7.8$  Hz, 1H), 7.31 – 7.10 (m, 7H), 2.83 – 2.73 (m, 1H), 2.67 (s, 9H), 2.53 (s, 3H).

$^{13}\text{C}$  NMR (101 MHz,  $\text{CDCl}_3$ )

$\delta$  136.3 (t,  $J = 25.7$  Hz), 135.4, 133.8, 131.5, 131.1, 129.4, 129.3, 129.0, 127.6 (t,  $J = 8.5$  Hz), 127.3, 126.5, 125.3 (t,  $J = 246.4$  Hz), 124.9, 95.2 (t,  $J = 6.8, 6.8$  Hz), 81.3, 52.7, 20.9.

$^{11}\text{B}$  NMR (128 MHz,  $\text{CDCl}_3$ )

$\delta$  -3.95.

$^{19}\text{F}$  NMR (376 MHz,  $\text{CDCl}_3$ )

$\delta$  -84.99 (d,  $J = 241.0$  Hz), -88.43 (d,  $J = 240.8$  Hz).

HRMS (ESI)

Calcd for  $[\text{C}_{20}\text{H}_{23}\text{BClF}_2\text{NNa}, \text{M}+\text{Na}]^+$ : 384.1472, found: 384.1472.

HPLC condition: Chiralcel AD-H column, *n*-hexane/*i*-PrOH = 90:10, flow rate = 1.0

mL/min, 254 nm UV detector,  $t_{\text{R}} = 5.43$  min (major) and  $t_{\text{R}} = 6.28$  min (minor).

**(+)-Trimethylamine-(4-(4-chlorophenyl)-1,1-difluoro-1-(*o*-tolyl)but-3-yn-2-yl)borane (3oa)**

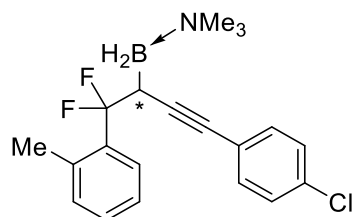

Serial number: zhn-6-102, Light yellow oil, 95% yield (34.3 mg), 99% ee.  $[\alpha]_{\text{D}}^{27} +17.1$  ( $c$  1.0,  $\text{CHCl}_3$ ). TLC  $R_f = 0.34$  (PE/EA = 5:1, v/v).

$^1\text{H}$  NMR (400 MHz,  $\text{CDCl}_3$ )

$\delta$  7.52 (d,  $J = 7.8$  Hz, 1H), 7.25 – 7.92 (m, 7H), 2.77 – 2.66 (m, 1H), 2.60 (s, 9H), 2.45 (s, 3H).

$^{13}\text{C}$  NMR (101 MHz,  $\text{CDCl}_3$ )

$\delta$  136.4 (t,  $J = 26.1$  Hz), 135.4, 132.9, 132.5, 131.5, 128.9, 128.3, 127.6 (t,  $J = 8.6$  Hz), 125.4 (t,  $J = 252.5$  Hz), 124.8, 123.3, 94.7 (t,  $J = 7.1$  Hz), 81.5, 52.7, 20.9 (t,  $J = 4.0$  Hz).

$^{11}\text{B}$  NMR (128 MHz,  $\text{CDCl}_3$ )

$\delta$  -3.94.

$^{19}\text{F}$  NMR (376 MHz,  $\text{CDCl}_3$ )

$\delta$  -85.01 (d,  $J = 240.2$  Hz), -88.50 (d,  $J = 240.3$  Hz).

### HRMS (ESI)

Calcd for  $[C_{20}H_{23}BClF_2NK, M+K]^+$ : 400.1212, found: 400.1206.

HPLC condition: Chiralcel AD-H column, *n*-hexane/*i*-PrOH = 90:10, flow rate = 1.0 mL/min, 254 nm UV detector,  $t_R$  = 6.37 min (minor) and  $t_R$  = 7.20 min (major).

### **(+)-Trimethylamine-(1,1-difluoro-4-(3-fluorophenyl)-1-(*o*-tolyl)but-3-yn-2-yl)borane (3pa)**

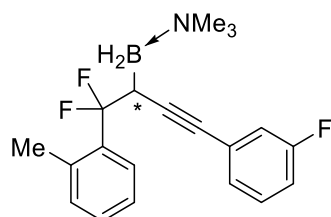

Serial number: zhn-6-201, Light yellow oil, 98% yield (33.8 mg), 97% ee.  $[\alpha]_D^{24} +16.6$  (*c* 1.0,  $CHCl_3$ ). TLC  $R_f$  = 0.31 (PE/EA = 5:1, v/v).

### $^1H$ NMR (400 MHz, $CDCl_3$ )

$\delta$  7.53 (d,  $J$  = 7.6 Hz, 1H), 7.21 – 7.07 (m, 4H), 7.00 (d,  $J$  = 7.7 Hz, 1H), 6.93 – 6.89 (m, 1H), 6.87 – 6.82 (m, 1H), 2.80 – 2.66 (m, 1H), 2.61 (s, 9H), 2.46 (t,  $J$  = 2.9 Hz, 3H).

### $^{13}C$ NMR (101 MHz, $CDCl_3$ )

$\delta$  162.3 (d,  $J$  = 245.3 Hz), 136.4 (t,  $J$  = 25.8 Hz), 135.4, 131.5, 131.1, 129.6 (d,  $J$  = 8.8 Hz), 128.9, 127.6 (t,  $J$  = 8.4 Hz), 127.1 (d,  $J$  = 2.4 Hz), 126.6 (d,  $J$  = 9.7 Hz), 125.3 (t,  $J$  = 246.4 Hz), 124.9, 118.0 (d,  $J$  = 21.9 Hz), 114.3 (d,  $J$  = 21.1 Hz), 95.0 – 94.8 (m), 81.5 (d,  $J$  = 3.2 Hz), 52.7, 20.9 (t,  $J$  = 3.8 Hz).

### $^{11}B$ NMR (128 MHz, $CDCl_3$ )

$\delta$  -4.03.

### $^{19}F$ NMR (376 MHz, $CDCl_3$ )

$\delta$  -85.11 (d,  $J$  = 240.7 Hz), -88.39 (d,  $J$  = 241.0 Hz), -113.74.

### HRMS (ESI)

Calcd for  $[C_{20}H_{23}BF_3NK, M+K]^+$ : 384.1507, found: 384.1505.

HPLC condition: Chiralcel AD-H column, *n*-hexane/*i*-PrOH = 90:10, flow rate = 1.0 mL/min, 254 nm UV detector,  $t_R$  = 5.41 min (major) and  $t_R$  = 6.37 min (minor).

**(+)-Trimethylamine-(1,1-difluoro-1-(*o*-tolyl)-4-(4-(trifluoromethyl)phenyl)but-3-yn-2-yl)borane (3qa)**

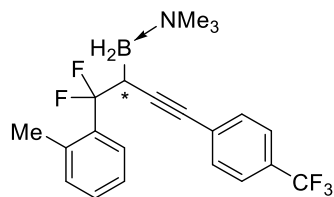

Serial number: zhn-8-51, Light yellow oil, 97% yield (38.3 mg), 99% ee.  $[\alpha]_D^{27} +15.4$  (*c* 1.0, CHCl<sub>3</sub>). TLC  $R_f = 0.35$  (PE/EA = 5:1, v/v).

<sup>1</sup>H NMR (400 MHz, CDCl<sub>3</sub>)

$\delta$  7.64 (d, *J* = 7.7 Hz, 1H), 7.52 (d, *J* = 8.0 Hz, 2H), 7.42 (d, *J* = 8.1 Hz, 2H), 7.33 – 7.18 (m, 3H), 2.90 – 2.77 (m, 1H), 2.71 (s, 9H), 2.57 (s, 2H).

<sup>13</sup>C NMR (101 MHz, CDCl<sub>3</sub>)

$\delta$  136.3 (t, *J* = 25.7 Hz), 135.4 (t, *J* = 2.6 Hz), 131.6, 131.4, 129.0, 128.8 (q, *J* = 45.3 Hz), 128.6, 127.6 (t, *J* = 8.5 Hz), 127.6 (t, *J* = 8.4 Hz), 125.3 (t, *J* = 252.5 Hz), 125.0 (q, *J* = 3.9 Hz), 124.9, 124.2 (t, *J* = 272.7 Hz), 96.8 (t, *J* = 6.8 Hz), 81.5, 52.7, 20.9 (t, *J* = 4.0 Hz).

<sup>19</sup>F NMR (376 MHz, CDCl<sub>3</sub>)

$\delta$  -62.62, -84.97 (d, *J* = 241.0 Hz), -88.40 (d, *J* = 241.1 Hz).

<sup>11</sup>B NMR (128 MHz, CDCl<sub>3</sub>)

$\delta$  -3.68.

HRMS (ESI)

Calcd for [C<sub>21</sub>H<sub>23</sub>BF<sub>5</sub>NNa, M + Na]<sup>+</sup>: 418.1736, found: 418.1735.

HPLC condition: Chiralcel AD-H column, *n*-hexane/*i*-PrOH = 90:10, flow rate = 1.0 mL/min, 254 nm UV detector,  $t_R = 7.05$  min (major) and  $t_R = 8.29$  min (minor).

**(-)-Trimethylamine-(1,1-difluoro-4-(naphthalen-1-yl)-1-(*o*-tolyl)but-3-yn-2-yl)borane (3ra)**

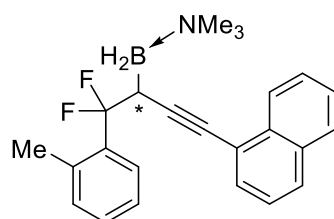

Serial number: zhn-7-3, Light yellow oil, 94% yield (38.2 mg), 99% ee.  $[\alpha]_D^{21} -3.2$  (*c* 1.0, CHCl<sub>3</sub>). TLC  $R_f = 0.34$  (PE/EA = 5:1, v/v).

<sup>1</sup>H NMR (400 MHz, CDCl<sub>3</sub>)

$\delta$  8.19 (d,  $J = 7.3$  Hz, 1H), 7.82 – 7.62 (m, 3H), 7.56 – 7.11 (m, 7H), 2.99 – 2.84 (m, 1H), 2.69 (s, 9H), 2.56 (s, 3H).

$^{13}\text{C}$  NMR (101 MHz,  $\text{CDCl}_3$ )

$\delta$  136.6 (t,  $J = 25.8$  Hz), 135.6 (t,  $J = 2.4$  Hz), 133.7, 133.2, 131.6, 131.2, 129.4, 128.9, 128.0, 127.7 (t,  $J = 8.5$  Hz), 127.5, 126.7, 126.4, 126.1, 125.5 (t,  $J = 238.4$  Hz), 125.2, 125.0, 122.5, 98.7 – 98.6 (m), 80.6, 52.8, 21.0 (t,  $J = 3.9$  Hz).

$^{11}\text{B}$  NMR (128 MHz,  $\text{CDCl}_3$ )

$\delta$  -3.56.

$^{19}\text{F}$  NMR (376 MHz,  $\text{CDCl}_3$ )

$\delta$  -85.44 (d,  $J = 241.3$  Hz), -87.83 (d,  $J = 240.6$  Hz).

HRMS (ESI)

Calcd for  $[\text{C}_{24}\text{H}_{26}\text{BF}_2\text{NNa}, \text{M}+\text{Na}]^+$ : 400.2019, found: 400.2024.

HPLC condition: Chiralcel IC-3 column, *n*-hexane/*i*-PrOH = 90:10, flow rate = 1.0 mL/min, 254 nm UV detector,  $t_{\text{R}} = 6.87$  min (major) and  $t_{\text{R}} = 7.29$  min (minor).

**(+)-Trimethylamine-(1,1-difluoro-4-(thiophen-2-yl)-1-(*o*-tolyl)but-3-yn-2-yl)borane (3sa)**

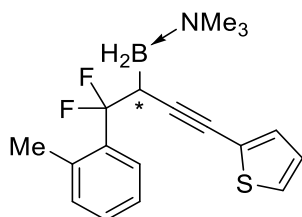

Serial number: zhn-6-105, Yellow oil, 82% yield (27.5 mg), 96% ee.  $[\alpha]_{\text{D}}^{27} +7.4$  (c 1.0,  $\text{CHCl}_3$ ). TLC  $R_f = 0.32$  (PE/EA = 5:1, v/v).

$^1\text{H}$  NMR (400 MHz,  $\text{CDCl}_3$ )

$\delta$  7.52 (d,  $J = 7.7$  Hz, 1H), 7.20 – 7.06 (m, 5H), 6.92 (d,  $J = 4.9$  Hz, 1H), 2.73 – 2.67 (m, 1H), 2.60 (s, 9H), 2.46 (t,  $J = 2.5$  Hz, 3H).

$^{13}\text{C}$  NMR (101 MHz,  $\text{CDCl}_3$ )

$\delta$  136.5 (t,  $J = 25.5$  Hz), 135.5 (t,  $J = 2.3$  Hz), 131.5, 130.0, 128.9, 127.7 (t,  $J = 8.5$  Hz), 126.8, 125.4 (t,  $J = 246.4$  Hz), 124.8, 124.7, 123.7, 92.9 – 92.6 (m), 77.6, 52.7, 20.9 (t,  $J = 4.0$  Hz).

$^{11}\text{B}$  NMR (128 MHz,  $\text{CDCl}_3$ )

$\delta$  -4.08.

$^{19}\text{F}$  NMR (376 MHz,  $\text{CDCl}_3$ )

$\delta$  -84.68 (d,  $J = 239.7$  Hz), -88.64 (d,  $J = 240.0$  Hz).

### HRMS (ESI)

Calcd for  $[C_{18}H_{22}BF_2NSNa, M+Na]^+$ : 356.1426, found: 356.1433.

HPLC condition: Chiralcel AD-H column, *n*-hexane/*i*-PrOH = 90:10, flow rate = 1.0 mL/min, 254 nm UV detector,  $t_R$  = 6.67 min (major) and  $t_R$  = 7.19 min (minor).

### **(-)-Trimethylamine-(4,4-difluoro-1-(naphthalen-1-yl)pent-1-yn-3-yl) borane (3ta)**

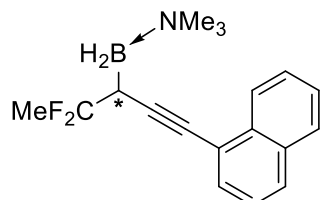

Serial number: zhn-7-129, Light yellow oil, 86% yield (26.0 mg), 73% ee.  $[\alpha]_D^{27}$  -4.0 (*c* 0.5, CHCl<sub>3</sub>). TLC  $R_f$  = 0.32 (PE/EA = 5:1, v/v).

### <sup>1</sup>H NMR (400 MHz, CDCl<sub>3</sub>)

$\delta$  8.32 (d,  $J$  = 8.2 Hz, 1H), 7.73 (d,  $J$  = 8.2 Hz, 1H), 7.66 (d,  $J$  = 8.2 Hz, 1H), 7.53 – 7.36 (m, 3H), 7.29 (t,  $J$  = 7.7 Hz, 1H), 2.65 (s, 9H), 2.54 – 2.40 (m, 1H), 1.70 (t,  $J$  = 18.4 Hz, 3H).

### <sup>13</sup>C NMR (101 MHz, CDCl<sub>3</sub>)

$\delta$  133.8, 133.2, 129.5, 128.1, 127.5, 126.9 (t,  $J$  = 242.4 Hz), 126.5, 126.5, 126.2, 125.2, 122.5, 99.4 (dd,  $J$  = 14.5, 3.4 Hz), 79.8 (d,  $J$  = 2.2 Hz), 52.8, 22.1 (t,  $J$  = 27.7 Hz).

### <sup>11</sup>B NMR (128 MHz, CDCl<sub>3</sub>)

$\delta$  -3.16 (t,  $J$  = 103.2 Hz).

### <sup>19</sup>F NMR (376 MHz, CDCl<sub>3</sub>)

$\delta$  -78.86 (d,  $J$  = 224.8 Hz), -87.46 (d,  $J$  = 223.4 Hz).

### HRMS (ESI)

Calcd for  $[C_{18}H_{22}BF_2NNa, M + Na]^+$ : 324.1706, found: 324.1710.

HPLC condition: Chiralcel AD-H column, *n*-hexane/*i*-PrOH = 90:10, flow rate = 1.0 mL/min, 254 nm UV detector,  $t_R$  = 5.88 min (major) and  $t_R$  = 6.34 min (minor).

## 6. The Optimization of the Addition Reaction of Aldehydes with Chiral *gem*-Difluoroalkyl Propargylic Boron (*R*)-3ba

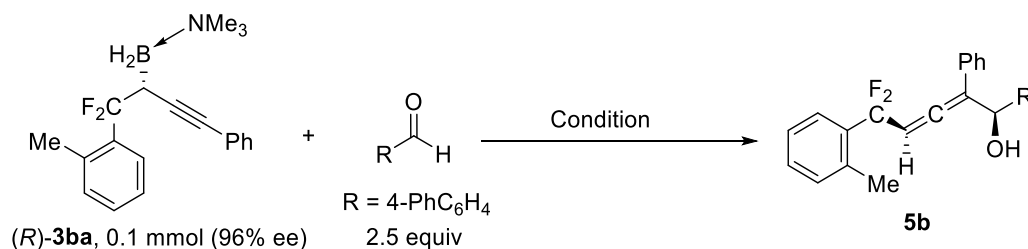

|              |                                                                   |                             |                   |
|--------------|-------------------------------------------------------------------|-----------------------------|-------------------|
| Condition A: | <br>Ar = 2,4,6-triPh, ( <i>R</i> )<br>(5 mol%)                    | , 5 Å MS, toluene, rt, 24 h | No Conv.          |
| Condition B: | CuBr (1 equiv), THF, rt, 24 h                                     |                             | No Conv.          |
| Condition C: | Et <sub>2</sub> Zn (1.2 equiv, 1 M in toluene), toluene, rt, 24 h |                             | No Conv.          |
| Condition D: | BF <sub>3</sub> •Et <sub>2</sub> O (2 equiv), rt, 3 h             |                             | 75% yield, 95% ee |

## 7. Procedures for Addition Reaction of Aldehydes with Chiral *gem*-Difluoroalkyl Propargylic Boron (*R*)-3ba

### 7.1 Procedure A

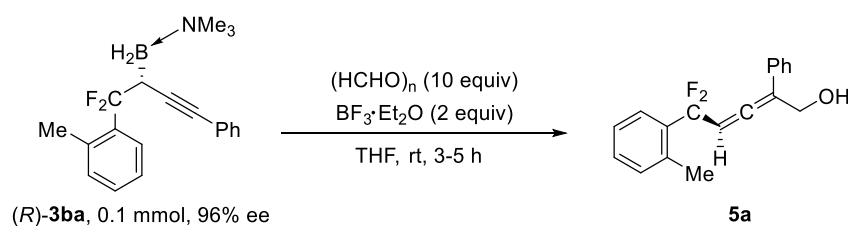

A 25 mL Schlenk tube was charged with (HCHO)<sub>n</sub> (30.0 mg, 1.0 mmol). Then 1.2 mL dry THF was injected under nitrogen atmosphere. The reaction mixture was heated to 70 °C for 2 h. To another 25 mL Schlenk tube was charged with (*R*)-**3ba** (32.7 mg, 0.1 mmol). Then 0.7 mL dry THF was injected under nitrogen atmosphere. After cooling to room temperature, transfer the latter mixture into the former Schlenk tube with a syringe. Then, BF<sub>3</sub>•Et<sub>2</sub>O (28.4 mg, 0.2 mmol) was added dropwise into the reaction system with a syringe. At room temperature, the reaction was kept stirring for

3 h, then TLC indicated that the substrate (*R*)-**3ba** was consumed completely. The reaction mixture was diluted with EtOAc (8 mL), and washed with brine (3 x 4 mL). The organic extract was dried over anhydrous NaSO<sub>4</sub>, filtered, and concentrated to give crude product. The crude product was purified by a flash chromatography on silica gel (eluting with petroleum ether/EtOAc/NEt<sub>3</sub> = 100:10:1, v/v) to afford **5a** as colorless oil (21.9 mg, 77% yield, 95% ee, 99% es).

## 7.2 Procedure B

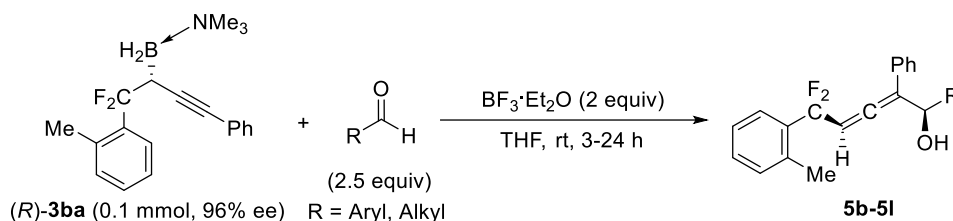

A 25 mL Schlenk tube was charged with (*R*)-**3ba** (32.7 mg, 0.1 mmol) and RCHO (0.25 mmol). Then 2.0 mL dry THF was injected under nitrogen atmosphere. Then, BF<sub>3</sub>·Et<sub>2</sub>O (28.4 mg, 0.2 mmol) was added dropwise into the reaction system with a syringe. At room temperature, the reaction was kept stirring for 3-24 h, then TLC indicated that the substrate (*R*)-**3ba** was consumed completely. The reaction mixture was diluted with EtOAc (8 mL), and washed with brine (3 x 4 mL). The organic extract was dried over anhydrous NaSO<sub>4</sub>, filtered, and concentrated to give crude product. The crude product was purified by a flash chromatography on silica gel (eluting with petroleum ether/EtOAc/NEt<sub>3</sub> = 100:x:1, v/v) to afford **5b-5l**.

## 8. Analytical Data of Chiral *gem*-Difluoroalkyl α-Allenols

### (-)-(*S*)-5,5-difluoro-2-phenyl-5-(*o*-tolyl)penta-2,3-dien-1-ol (**5a**)

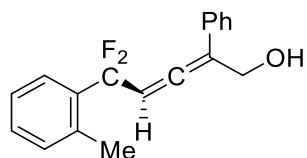

Serial number: zhn-7-31, 77% yield (21.9 mg), 95% ee, 99% es, colorless oil,  $[\alpha]_D^{22} - 233.6$  (*c* 0.5, CHCl<sub>3</sub>). TLC  $R_f = 0.39$  (PE/EA = 5:1, v/v).

#### <sup>1</sup>H NMR (400 MHz, CDCl<sub>3</sub>)

$\delta$  7.47 (d, *J* = 7.8 Hz, 1H), 7.28 – 7.07 (m, 8H), 6.14 – 6.00 (m, 1H), 4.43 – 4.27 (m, 2H), 2.34 (d, *J* = 2.4 Hz, 3H), 1.12 (s, 1H).

#### <sup>13</sup>C NMR (101 MHz, CDCl<sub>3</sub>)



$\delta$  204.9, 136.0 (t,  $J = 2.5$  Hz), 134.8 (t,  $J = 25.3$  Hz), 132.2 (t,  $J = 2.0$  Hz), 131.7, 130.0, 128.7, 128.1, 126.5, 125.7 (t,  $J = 7.8$  Hz), 125.6, 120.1, 112.1, 96.9 (t,  $J = 35.6$  Hz), 61.6 (t,  $J = 2.4$  Hz), 20.3 (t,  $J = 3.1$  Hz).

$^{19}\text{F}$  NMR (376 MHz,  $\text{CDCl}_3$ )

$\delta$  -85.22.

HRMS (ESI)

Calcd for  $[\text{C}_{18}\text{H}_{16}\text{F}_2\text{ONa}, \text{M} + \text{Na}]^+$ : 309.1061, found: 309.1065.

HPLC condition: Chiralcel AD-H column, *n*-hexane/*i*-PrOH = 90:10, flow rate = 1.0 mL/min, 254 nm UV detector,  $t_{\text{R}} = 6.69$  min (minor) and  $t_{\text{R}} = 7.81$  min (major).

**(-)-(1*R*,3*S*)-1-([1,1'-biphenyl]-4-yl)-5,5-difluoro-2-phenyl-5-(*o*-tolyl)penta-2,3-dien-1-ol (5b)**

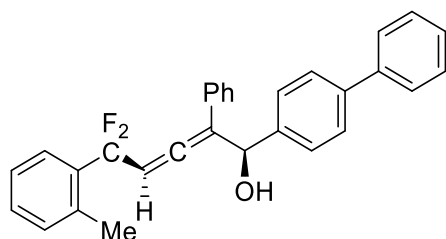

Serial number: zhn-7-29, 75% yield (33.0 mg), 95% ee, 99% es, colorless oil,  $[\alpha]_{\text{D}}^{23} - 234.0$  (*c* 1.0,  $\text{CHCl}_3$ ). TLC  $R_f = 0.37$  (PE/EA = 5:1, v/v). Note: we confirmed absolute configurations of (*R*, *S*)-**5b** by ECD spectra (experimental and computed ECD spectra).

$^1\text{H}$  NMR (400 MHz,  $\text{CDCl}_3$ )

$\delta$  7.60 – 7.49 (m, 3H), 7.44 – 7.40 (m, 4H), 7.36 – 7.32 (m, 2H), 7.29 – 7.14 (m, 7H), 7.10 (d,  $J = 7.9$  Hz, 2H), 6.32 (td,  $J = 6.1, 2.6$  Hz, 1H), 5.61 (s, 1H), 2.39 (s, 3H), 1.96 (d,  $J = 4.9$  Hz, 1H).

$^{13}\text{C}$  NMR (101 MHz,  $\text{CDCl}_3$ )

$\delta$  204.4 (t,  $J = 10.0$  Hz), 141.0, 140.6, 139.6, 136.4, 134.8 (t,  $J = 25.3$  Hz), 132.6, 131.9, 130.0, 128.8, 128.6, 128.0, 127.6, 127.4, 127.3, 127.3, 127.1, 126.0 (t,  $J = 7.9$  Hz), 125.7, 120.3, 115.8, 98.4 (t,  $J = 35.9$  Hz), 72.7, 20.4 .

$^{19}\text{F}$  NMR (376 MHz,  $\text{CDCl}_3$ )

$\delta$  -84.05, -84.16.

HRMS (ESI)

Calcd for  $[\text{C}_{30}\text{H}_{24}\text{F}_2\text{ONa}, \text{M} + \text{Na}]^+$ : 461.1687, found: 461.1678.

HPLC condition: Chiralcel AD-H column, *n*-hexane/*i*-PrOH = 95:5, flow rate = 1.0 mL/min, 254 nm UV detector,  $t_{\text{R}} = 23.34$  min (minor) and  $t_{\text{R}} = 32.00$  min (major).

**(-)-(1R,3S)-1-(4-chlorophenyl)-5,5-difluoro-2-phenyl-5-(*o*-tolyl)penta-2,3-dien-1-ol (5c)**

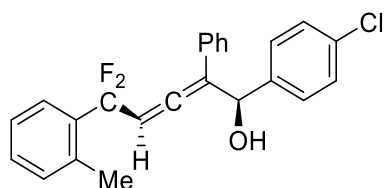

Serial number: zhn-7-81, 69% yield (27.4 mg), 95% ee, 99% es, colorless oil,  $[\alpha]_D^{26} - 244.8$  (*c* 1.0, CHCl<sub>3</sub>). TLC  $R_f = 0.39$  (PE/EA = 5:1, v/v).

<sup>1</sup>H NMR (400 MHz, CDCl<sub>3</sub>)

$\delta$  7.55 (d, *J* = 7.8 Hz, 1H), 7.39 (t, *J* = 7.5 Hz, 1H), 7.32 – 7.10 (m, 9H), 6.99 (d, *J* = 8.2 Hz, 2H), 6.31 (td, *J* = 6.4, 2.6 Hz, 1H), 5.57 (s, 1H), 2.40 (s, 3H), 2.01 (s, 1H).

<sup>13</sup>C NMR (101 MHz, CDCl<sub>3</sub>)

$\delta$  203.3 (t, *J* = 10.0 Hz), 138.0, 135.3, 133.7 (t, *J* = 25.1 Hz), 132.8, 131.2, 130.9, 129.0, 127.7, 127.5, 127.4, 127.1, 126.2, 124.9 (t, *J* = 7.9 Hz), 124.6, 119.1 (t, *J* = 242.4 Hz), 114.6, 97.3 (t, *J* = 36.1 Hz), 71.3, 19.3 (t, *J* = 3.0 Hz).

<sup>19</sup>F NMR (376 MHz, CDCl<sub>3</sub>)

$\delta$  -84.13, -84.27.

HRMS (ESI)

Calcd for [C<sub>24</sub>H<sub>19</sub>Cl<sub>2</sub>F<sub>2</sub>O, M + Cl]<sup>-</sup>: 431.0787, found: 431.0785.

HPLC condition: Chiralcel AD-H column, *n*-hexane/*i*-PrOH = 90:10, flow rate = 1.0 mL/min, 254 nm UV detector,  $t_R = 9.40$  min (minor) and  $t_R = 14.36$  min (major).

**(-)-(1R,3S)-1-(4-bromophenyl)-5,5-difluoro-2-phenyl-5-(*o*-tolyl)penta-2,3-dien-1-ol (5d)**

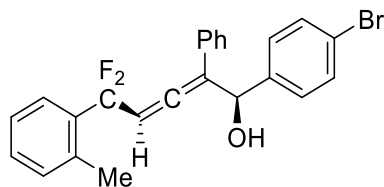

Serial number: zhn-7-79, 73% yield (32.0 mg), 95% ee, 99% es, colorless oil,  $[\alpha]_D^{26} - 202.1$  (*c* 1.0, CHCl<sub>3</sub>). TLC  $R_f = 0.38$  (PE/EA = 5:1, v/v).

<sup>1</sup>H NMR (400 MHz, CDCl<sub>3</sub>)

$\delta$  7.54 (t, *J* = 6.0 Hz, 1H), 7.47 – 7.08 (m, 10H), 6.93 (t, *J* = 5.8 Hz, 2H), 6.31 (s, 1H), 5.55 (s, 1H), 2.40 (s, 3H), 2.02 (s, 1H).

<sup>13</sup>C NMR (101 MHz, CDCl<sub>3</sub>)

δ 204.3 (t, *J* = 10.0 Hz), 139.6, 136.4, 134.7 (t, *J* = 25.0 Hz), 132.3, 131.9, 131.6, 130.1, 128.8, 128.6, 128.1, 127.2, 126.0 (t, *J* = 7.9 Hz), 125.7, 122.1, 120.1 (t, *J* = 241.4 Hz), 115.6, 98.4 (t, *J* = 35.8 Hz), 72.4, 20.3.

<sup>19</sup>F NMR (376 MHz, CDCl<sub>3</sub>)

δ -84.15, -84.27.

HRMS (ESI)

Calcd for [C<sub>24</sub>H<sub>19</sub>BrF<sub>2</sub>OCl, M + Cl]<sup>-</sup>: 475.0281, found: 475.0280.

HPLC condition: Chiralcel AD-H column, *n*-hexane/*i*-PrOH = 90:10, flow rate = 1.0 mL/min, 254 nm UV detector, *t*<sub>R</sub> = 10.09 min (minor) and *t*<sub>R</sub> = 14.89 min (major).

**(-)-(1*R*,3*S*)-5,5-difluoro-1-(4-methoxyphenyl)-2-phenyl-5-(*o*-tolyl)penta-2,3-dien-1-ol (5e)**

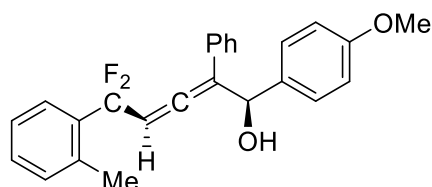

Serial number: zhn-7-83, 54% yield (21.2 mg), 95% ee, 99% es, colorless oil, [ $\alpha$ ]<sub>D</sub><sup>25</sup> -198.8 (*c* 0.5, CHCl<sub>3</sub>). TLC R<sub>f</sub> = 0.34 (PE/EA = 5:1, v/v).

<sup>1</sup>H NMR (400 MHz, CDCl<sub>3</sub>)

δ 7.59 (d, *J* = 7.8 Hz, 1H), 7.39 (t, *J* = 7.4 Hz, 1H), 7.32 – 7.11 (m, 7H), 6.96 (d, *J* = 8.6 Hz, 2H), 6.75 (d, *J* = 8.6 Hz, 2H), 6.33 (td, *J* = 6.5, 2.9 Hz, 1H), 5.55 (dd, *J* = 5.1, 2.9 Hz, 1H), 3.79 (s, 3H), 2.43 (s, 3H), 1.88 (d, *J* = 5.3 Hz, 1H).

<sup>13</sup>C NMR (101 MHz, CDCl<sub>3</sub>)

δ 204.1 (t, *J* = 9.1 Hz), 159.4, 136.4, 134.8, 132.8, 132.6, 131.9, 130.0, 128.5, 128.5, 127.9, 127.2, 126.0 (t, *J* = 7.9 Hz), 125.6, 120.4 (t, *J* = 288.9 Hz), 116.0, 113.9, 98.3 (t, *J* = 36.4 Hz), 72.5, 55.2, 20.4 (t, *J* = 2.0 Hz).

<sup>19</sup>F NMR (376 MHz, CDCl<sub>3</sub>)

δ -84.06, -84.21.

HRMS (ESI)

Calcd for [C<sub>25</sub>H<sub>22</sub>F<sub>2</sub>O<sub>2</sub>K, M + K]<sup>+</sup>: 431.1219, found: 431.1225.

HPLC condition: Chiralcel AD-H column, *n*-hexane/*i*-PrOH = 90:10, flow rate = 1.0 mL/min, 254 nm UV detector, *t*<sub>R</sub> = 15.19 min (minor) and *t*<sub>R</sub> = 26.85 min

(major).

**(-)-(1*S*,3*S*)-5,5-difluoro-2-phenyl-1-(thiophen-2-yl)-5-(*o*-tolyl)penta-2,3-dien-1-ol (5f)**

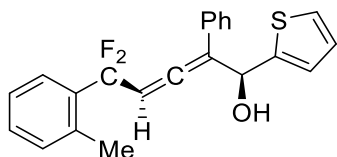

Serial number: zhn-7-95, 62% yield (22.7 mg), 94% ee, 98% es, colorless oil,  $[\alpha]_D^{25} -241.2$  (*c* 0.5, CHCl<sub>3</sub>). TLC  $R_f = 0.37$  (PE/EA = 5:1, v/v).

<sup>1</sup>H NMR (400 MHz, CDCl<sub>3</sub>)

$\delta$  7.54 (d, *J* = 7.8 Hz, 1H), 7.33 – 7.16 (m, 9H), 6.81 (dd, *J* = 5.1, 3.5 Hz, 1H), 6.60 (d, *J* = 3.5 Hz, 1H), 6.31 (td, *J* = 6.9, 2.5 Hz, 1H), 5.79 (s, 1H), 2.38 (s, 3H), 2.07 (d, *J* = 5.4 Hz, 1H).

<sup>13</sup>C NMR (101 MHz, CDCl<sub>3</sub>)

$\delta$  204.0 (t, *J* = 9.8 Hz), 144.5, 136.3, 134.7, 132.3, 131.9, 130.0, 128.6, 128.1, 127.2, 126.8, 125.9 (t, *J* = 8.2 Hz), 125.9, 125.8, 125.7, 120.03 (t, *J* = 242.4 Hz), 116.0, 98.7 (t, *J* = 35.5 Hz), 68.5, 20.4.

<sup>19</sup>F NMR (376 MHz, CDCl<sub>3</sub>)

$\delta$  -84.56.

HRMS (ESI)

Calcd for [C<sub>22</sub>H<sub>18</sub>F<sub>2</sub>OSNa, M + Na]<sup>+</sup>: 391.0939, found: 391.0930.

HPLC condition: Chiralcel AD-H column, *n*-hexane/*i*-PrOH = 90:10, flow rate = 1.0 mL/min, 254 nm UV detector,  $t_R = 9.95$  min (minor) and  $t_R = 22.70$  min (major).

**(-)-(1*S*,3*S*)-5,5-difluoro-1-(furan-2-yl)-2-phenyl-5-(*o*-tolyl)penta-2,3-dien-1-ol (5g)**

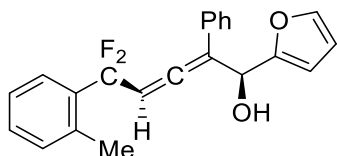

Serial number: zhn-7-91, 66% yield (23.2 mg), 95% ee, 99% es, colorless oil,  $[\alpha]_D^{26} -131.2$  (*c* 0.25, CHCl<sub>3</sub>). TLC  $R_f = 0.35$  (PE/EA = 5:1, v/v).

<sup>1</sup>H NMR (400 MHz, CDCl<sub>3</sub>)

$\delta$  7.54 (d, *J* = 7.8 Hz, 1H), 7.3 – 7.12 (m, 9H), 6.31 (td, *J* = 6.9, 2.6 Hz, 1H), 6.19 (dd, *J* = 3.1, 1.8 Hz, 1H), 5.79 (d, *J* = 3.3 Hz, 1H), 5.61 (d, *J* = 2.7 Hz, 1H), 2.38 (s, 3H), 2.11 (s, 1H).

<sup>13</sup>C NMR (101 MHz, CDCl<sub>3</sub>)

δ 203.3 (t, *J* = 9.9 Hz), 152.4, 141.5, 135.2, 133.6 (t, *J* = 25.3 Hz), 131.3 (t, *J* = 1.8 Hz), 130.8, 128.9, 127.5, 127.0, 125.8, 124.9 (t, *J* = 7.9 Hz), 124.6, 119.0 (t, *J* = 242.4 Hz), 113.1, 109.4, 107.2, 97.7 (t, *J* = 35.8 Hz), 65.3, 19.3.

<sup>19</sup>F NMR (376 MHz, CDCl<sub>3</sub>)

δ -84.65.

HRMS (ESI)

Calcd for [C<sub>22</sub>H<sub>18</sub>F<sub>2</sub>O<sub>2</sub>Na, M + Na]<sup>+</sup>: 375.1167, found: 375.1163.

HPLC condition: Chiralcel AD-H column, *n*-hexane/*i*-PrOH = 90:10, flow rate = 1.0 mL/min, 254 nm UV detector, *t*<sub>R</sub> = 10.99 min (minor) and *t*<sub>R</sub> = 14.68 min (major).

**(-)-(3*R*,5*S*)-7,7-difluoro-1,4-diphenyl-7-(*o*-tolyl)hepta-4,5-dien-3-ol (5h)**

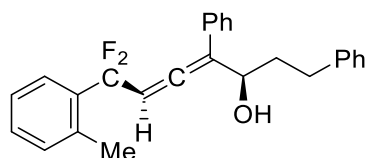

Serial number: zhn-7-39, 70% yield (27.2 mg), 95% ee, 99% es, colorless oil, [α]<sub>D</sub><sup>26</sup> -19.2 (*c* 1.0, CHCl<sub>3</sub>). TLC *R*<sub>f</sub> = 0.42 (PE/EA = 5:1, v/v).

<sup>1</sup>H NMR (400 MHz, CDCl<sub>3</sub>)

δ 7.54 (d, *J* = 7.7 Hz, 1H), 7.37 – 6.94 (m, 13H), 6.18 (t, *J* = 6.4 Hz, 1H), 4.47 (t, *J* = 5.8 Hz, 1H), 2.69 – 2.49 (m, 2H), 2.35 (s, 3H), 1.81 – 1.54 (m, 2H), 1.48 (s, 1H)

<sup>13</sup>C NMR (101 MHz, CDCl<sub>3</sub>)

δ 204.1 (t, *J* = 9.8 Hz), 141.5, 136.2 (t, *J* = 2.6 Hz), 134.9 (t, *J* = 24.9 Hz), 133.0 (t, *J* = 2.0 Hz), 131.8, 130.0, 128.7, 128.5, 128.3, 128.1, 127.1, 125.9, 125.8 (t, *J* = 8.0 Hz), 125.6, 120.3 (t, *J* = 242.4 Hz), 116.4, 97.5 (t, *J* = 35.8 Hz), 69.9, 37.1, 31.6, 20.4 (t, *J* = 2.8 Hz).

<sup>19</sup>F NMR (376 MHz, CDCl<sub>3</sub>)

δ -84.14 (d, *J* = 261.7 Hz), -85.22 (d, *J* = 260.8 Hz).

HRMS (ESI)

Calcd for [C<sub>26</sub>H<sub>24</sub>F<sub>2</sub>O<sub>2</sub>Na, M + Na]<sup>+</sup>: 413.1687, found: 413.1676.

HPLC condition: Chiralcel AD-H column, *n*-hexane/*i*-PrOH = 90:10, flow rate = 1.0 mL/min, 254 nm UV detector, *t*<sub>R</sub> = 8.14 min (minor) and *t*<sub>R</sub> = 11.67 min (major).

**(-)-(2R,4S)-6,6-difluoro-1,3-diphenyl-6-(*o*-tolyl)hexa-3,4-dien-2-ol (5i)**

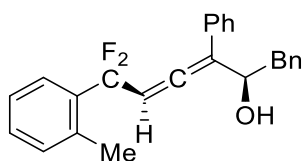

Serial number: zhn-7-73, 71% yield (26.8 mg), 95% ee, 99% es, colorless oil,  $[\alpha]_D^{24} - 86.4$  ( $c$  1.0,  $\text{CHCl}_3$ ). TLC  $R_f = 0.48$  (PE/EA = 5:1, v/v).

$^1\text{H}$  NMR (400 MHz,  $\text{CDCl}_3$ )

$\delta$  7.57 – 7.52 (m, 1H), 7.36 – 7.17 (m, 11H), 7.11 (d,  $J = 7.3$  Hz, 2H), 6.18 (t,  $J = 8.0$  Hz, 1H), 4.67 (d,  $J = 9.0$  Hz, 1H), 2.77 – 2.72 (m, 1H), 2.50 – 2.43 (m, 1H), 2.40 (s, 3H), 1.61 (s, 1H).

$^{13}\text{C}$  NMR (101 MHz,  $\text{CDCl}_3$ )

$\delta$  204.5 (t,  $J = 9.5$  Hz), 137.9, 136.3, 135.0 (t,  $J = 25.2$  Hz), 133.1 (t,  $J = 2.0$  Hz), 131.8, 130.0, 129.3, 128.7, 128.6, 128.1, 127.2, 126.7, 125.8 (t,  $J = 7.9$  Hz), 125.6, 120.3 (t,  $J = 242.4$  Hz), 115.9, 97.6 (t,  $J = 35.4$  Hz), 71.4, 42.3, 20.4 (t,  $J = 3.0$  Hz).

$^{19}\text{F}$  NMR (376 MHz,  $\text{CDCl}_3$ )

$\delta$  -84.25 (d,  $J = 261.2$  Hz), -85.20 (d,  $J = 261.0$  Hz).

HRMS (ESI)

Calcd for  $[\text{C}_{25}\text{H}_{22}\text{F}_2\text{ONa}, \text{M} + \text{Na}]^+$ : 399.1531, found: 399.1530.

HPLC condition: Chiralcel AD-H column, *n*-hexane/*i*-PrOH = 90:10, flow rate = 1.0 mL/min, 254 nm UV detector,  $t_R = 8.63$  min (minor) and  $t_R = 10.55$  min (major).

**(-)-(1R,3S)-1-cyclopentyl-5,5-difluoro-2-phenyl-5-(*o*-tolyl)penta-2,3-dien-1-ol (5j)**

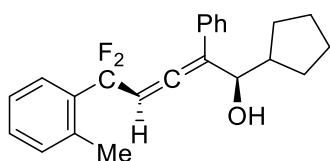

Serial number: zhn-7-93, 73% yield (25.7 mg), 95% ee, 99% es, colorless oil,  $[\alpha]_D^{26} - 127.6$  ( $c$  0.5,  $\text{CHCl}_3$ ). TLC  $R_f = 0.51$  (PE/EA = 5:1, v/v).

$^1\text{H}$  NMR (400 MHz,  $\text{CDCl}_3$ )

$\delta$  7.49 (d,  $J = 7.9$  Hz, 1H), 7.28 – 7.04 (m, 8H), 6.04 (t,  $J = 6.7$  Hz, 1H), 4.18 (d,  $J = 7.6$  Hz, 1H), 2.26 (s, 3H), 1.86 (q,  $J = 7.9$  Hz, 1H), 1.58 – 1.39 (m, 5H), 1.27 – 0.96 (m, 4H).

$^{13}\text{C}$  NMR (101 MHz,  $\text{CDCl}_3$ )

$\delta$  204.7 (t,  $J = 9.7$  Hz), 136.4 (t,  $J = 2.4$  Hz), 134.9 (t,  $J = 25.1$  Hz), 133.6, 131.8, 130.0, 128.5, 127.9, 127.5, 125.8 (t,  $J = 7.9$  Hz), 125.5, 120.3 (t,  $J = 240.4$  Hz), 116.2, 96.2 (t,  $J = 35.5$  Hz), 75.5, 44.0, 29.2, 28.2, 25.7, 20.3 (t,  $J = 2.9$  Hz).

$^{19}\text{F}$  NMR (376 MHz,  $\text{CDCl}_3$ )

$\delta$  -84.15 (d,  $J = 261.7$  Hz), -85.37 (d,  $J = 261.2$  Hz).

HRMS (ESI)

Calcd for  $[\text{C}_{23}\text{H}_{24}\text{F}_2\text{ONa}, \text{M} + \text{Na}]^+$ : 377.1687, found: 377.1688.

HPLC condition: Chiralcel AD-H column, *n*-hexane/*i*-PrOH = 90:10, flow rate = 1.0 mL/min, 254 nm UV detector,  $t_{\text{R}} = 5.88$  min (minor) and  $t_{\text{R}} = 10.25$  min (major).

**(-)-*tert*-butyl((2*S*,3*S*,5*S*)-7,7-difluoro-3-hydroxy-1,4-diphenyl-7-(*o*-tolyl)hepta-4,5-dien-2-yl)carbamate (5k)**

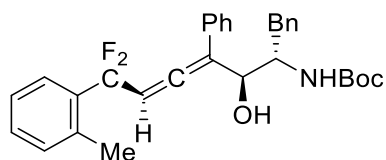

Serial number: zhn-7-77, 83% yield (41.8 mg), d.r. > 20:1, colorless oil,  $[\alpha]_{\text{D}}^{24} -79.4$  ( $c$  1.0,  $\text{CHCl}_3$ ). TLC  $R_f = 0.36$  (PE/EA = 3:1, v/v).

$^1\text{H}$  NMR (400 MHz,  $\text{CDCl}_3$ )

$\delta$  7.61 (d,  $J = 7.7$  Hz, 1H), 7.32 – 7.14 (m, 11H), 6.98 (s, 2H), 6.15 (t,  $J = 7.6$  Hz, 1H), 4.76 (s, 1H), 4.57 (s, 1H), 3.85 – 3.71 (m, 1H), 2.89 (d,  $J = 7.6$  Hz, 2H), 2.42 (s, 3H), 1.36 (s, 9H), 1.18 (s, 1H).

$^{13}\text{C}$  NMR (101 MHz,  $\text{CDCl}_3$ )

$\delta$  203.4 (t,  $J = 8.7$  Hz), 155.9, 138.1, 136.1, 133.0, 131.8, 130.0, 129.4, 128.7, 128.5, 128.5 (t,  $J = 23.7$  Hz), 128.2, 127.1, 126.5, 125.8 (t,  $J = 8.1$  Hz), 125.7, 119.49 (t,  $J = 242.4$  Hz), 115.2, 97.7 (t,  $J = 35.4$  Hz), 79.4, 70.0, 54.6, 38.0, 28.2, 20.3 (t,  $J = 3.0$  Hz).

$^{19}\text{F}$  NMR (376 MHz,  $\text{CDCl}_3$ )

$\delta$  -85.17 (d,  $J = 257.2$  Hz), -86.08 (d,  $J = 256.6$  Hz).

HRMS (ESI)

Calcd for  $[\text{C}_{31}\text{H}_{34}\text{F}_2\text{NO}_3, \text{M} + \text{H}]^+$ : 506.2501, found: 506.2494.

**(-)-tert-butyl((2*S*,3*S*,5*S*)-7,7-difluoro-3-hydroxy-4-phenyl-7-(*o*-tolyl)hepta-4,5-dien-2-yl)carbamate (**5l**)**

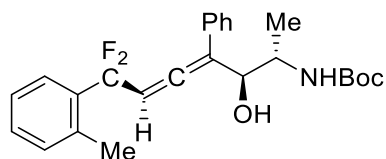

Serial number: zhn-7-89, 77% yield (33.1 mg), d.r. > 20:1, colorless oil,  $[\alpha]_D^{23}$  -65.0 (*c* 1.0, CHCl<sub>3</sub>). TLC  $R_f$  = 0.34 (PE/EA = 3:1, v/v).

<sup>1</sup>H NMR (400 MHz, CDCl<sub>3</sub>)

$\delta$  7.64 (d, *J* = 6.9 Hz, 1H), 7.39 – 7.18 (m, 8H), 6.20 (t, *J* = 8.2 Hz, 1H), 4.60 (s, 1H), 4.48 – 4.41 (m, 1H), 3.76 – 3.65 (m, 1H), 2.45 (s, 3H), 1.44 (d, *J* = 3.0 Hz, 9H), 1.29 (d, *J* = 3.1 Hz, 1H), 1.05 (dd, *J* = 7.1, 2.9 Hz, 3H).

<sup>13</sup>C NMR (101 MHz, CDCl<sub>3</sub>)

$\delta$  204.1 (t, *J* = 8.8 Hz), 156.3, 136.2, 135.0 (t, *J* = 25.4 Hz), 133.6, 131.9, 130.0, 128.7, 128.1, 127.3, 125.8 (t, *J* = 7.9 Hz), 125.7, 119.7 (t, *J* = 242.4 Hz), 114.7, 97.2 (t, *J* = 34.7 Hz), 79.7, 74.9, 50.2, 28.3, 20.3 (t, *J* = 3.1 Hz), 17.8.

<sup>19</sup>F NMR (376 MHz, CDCl<sub>3</sub>)

$\delta$  -85.04, -84.11.

HRMS (ESI)

Calcd for [C<sub>25</sub>H<sub>30</sub>F<sub>2</sub>NO<sub>3</sub>, M + H]<sup>+</sup>: 430.2188, found: 430.2185.

## 9. Transformations of Chiral *gem*-Difluoroalkyl $\alpha$ -Allenols

### 9.1 Transformation of **5b** to **6**

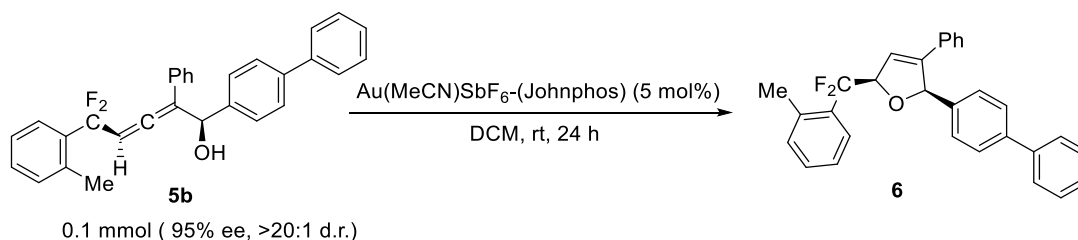

A dried 25 mL Schlenk tube equipped with a magnetic stirring bar was charged with **5b** (43.8 mg, 0.1 mmol, 1.0 equiv), [Au(Johnphos)(CH<sub>3</sub>CN)]SbF<sub>6</sub> (3.8 mg, 0.005 mmol, 5 mol%) in a glove box under Ar atmosphere. Anhydrous DCM (3.0 mL) was added via a syringe. The resulting reaction mixture was stirred at room temperature for 24 hours. After the volatiles were removed under reduced pressure, the crude was purified by silica gel column chromatography (petroleum ether/ethyl acetate = 50/1, v/v) to give the product **6** (35.9 mg, colorless oil, 82% yield, 94% ee, 99% es, > 20:1



d.r.). Serial number: zhn-7-107,  $[\alpha]_D^{23}$  -146.8 (*c* 0.5, CHCl<sub>3</sub>). TLC  $R_f$  = 0.39 (PE/EA = 20:1, v/v). Note: The relative configuration of the compound **6** was determined by <sup>1</sup>H-<sup>1</sup>H Noesy.

<sup>1</sup>H NMR (400 MHz, CDCl<sub>3</sub>)

$\delta$  7.63 – 6.98 (m, 18H), 6.41 (s, 1H), 6.18 (s, 1H), 5.44 (p, *J* = 5.3 Hz, 1H), 2.32 (s, 3H).

<sup>13</sup>C NMR (101 MHz, CDCl<sub>3</sub>)

$\delta$  144.2, 141.0, 140.7, 138.2, 137.0, 132.5 (*t*, *J* = 23.7 Hz), 132.1, 132.0, 129.9, 129.1, 128.8, 128.5, 128.4, 127.5 (*t*, *J* = 8.1 Hz), 127.4, 127.1, 127.1, 126.8, 125.5, 121.6, (*t*, *J* = 249.0 Hz), 120.1, 89.1, 88.11 (*t*, *J* = 33.3 Hz), 20.7 (*t*, *J* = 4.3 Hz).

<sup>19</sup>F NMR (376 MHz, CDCl<sub>3</sub>)

$\delta$  -99.38 (*d*, *J* = 256.1 Hz), -103.19 (*d*, *J* = 256.0 Hz).

HRMS (ESI)

Calcd for [C<sub>30</sub>H<sub>28</sub>F<sub>2</sub>NO, M+NH<sub>4</sub>]<sup>+</sup>: 456.2134, found: 456.2128.

HPLC condition: Chiralcel AD-H column, *n*-hexane/*i*-PrOH = 95:5, flow rate = 1.0 mL/min, 254 nm UV detector, *t*<sub>R</sub> = 6.71 min (minor) and *t*<sub>R</sub> = 8.72 min (major).

## 9.2 Transformation of **6** to **7**

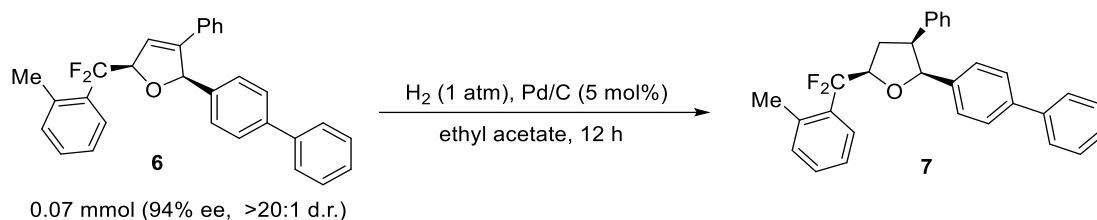

A 25 mL Schlenk tube equipped with a magnetic stirring bar was charged with **6** (30.7 mg, 0.07 mmol, 1.0 equiv) and EtOAc (3 mL). To the solution was added Pd/C (3.7 mg, 10% w/w). The resulting mixture was stirred for 12 hours at room temperature under H<sub>2</sub> atmosphere (a balloon). The black solids were filtered off and washed thoroughly with DCM. After the volatiles were removed under reduced pressure, the crude was purified by silica gel column chromatography (petroleum ether/ethyl acetate = 50/1) to give product **7** (27.0 mg, colorless oil, 88% yield, 94% ee, 100% es, > 20:1 d.r.). Serial number: zhn-7-109.  $[\alpha]_D^{23}$  +120.7 (*c* 0.5, CHCl<sub>3</sub>). TLC  $R_f$  = 0.37 (PE/EA = 20:1, v/v).

<sup>1</sup>H NMR (400 MHz, CDCl<sub>3</sub>)

$\delta$  7.64 (d,  $J = 7.7$  Hz, 1H), 7.48 (d,  $J = 7.2$  Hz, 2H), 7.41 – 7.33 (m, 3H), 7.31 – 7.25 (m, 5H), 7.06 – 6.93 (m, 5H), 6.88 – 6.77 (m, 2H), 5.34 (d,  $J = 8.6$  Hz, 1H), 4.72 – 4.63 (m, 1H), 3.92 – 3.85 (m, 1H), 2.60 (t,  $J = 2.7$  Hz, 3H), 2.58 – 2.50 (m, 1H), 2.44 – 2.38 (m, 1H).

$^{13}\text{C}$  NMR (101 MHz,  $\text{CDCl}_3$ )

$\delta$  140.9, 139.5, 138.9, 138.5, 136.7, 133.0 (t,  $J = 24.1$  Hz), 132.1, 130.12, 128.7, 128.6, 127.8, 127.3 (t,  $J = 8.8$  Hz), 127.1, 127.0, 126.9, 126.5, 126.1, 125.7, 121.9 (dd,  $J = 249.0, 243.6$  Hz), 84.8, 80.8 (dd,  $J = 35.0, 29.4$  Hz), 49.8, 32.2, 20.9 (t,  $J = 4.2$  Hz).

$^{19}\text{F}$  NMR (376 MHz,  $\text{CDCl}_3$ )

-99.63 (d,  $J = 257.5$  Hz), -105.49 (d,  $J = 257.7$  Hz).

HRMS (ESI)

Calcd for  $[\text{C}_{30}\text{H}_{26}\text{F}_2\text{NaO}, \text{M}+\text{Na}]^+$ : 463.1844, found: 463.1850.

HPLC condition: Chiralcel AD-H column, *n*-hexane/*i*-PrOH = 98:2, flow rate = 1.0 mL/min, 254 nm UV detector,  $t_{\text{R}} = 11.56$  min (major) and  $t_{\text{R}} = 13.10$  min (minor).

## 10. X-Ray Diffraction Analysis of (*R*)-3fa

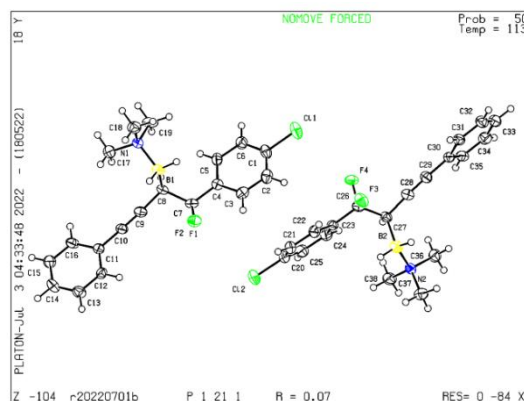

|                   |                                                   |
|-------------------|---------------------------------------------------|
| CCDC number       | 2246187                                           |
| Empirical formula | $\text{C}_{19}\text{H}_{21}\text{BCIF}_2\text{N}$ |
| Formula weight    | 347.63                                            |
| Temperature/K     | 113.15                                            |
| Crystal system    | monoclinic                                        |
| Space group       | $P2_1$                                            |
| $a/\text{\AA}$    | 8.2271(5)                                         |
| $b/\text{\AA}$    | 10.3968(7)                                        |
| $c/\text{\AA}$    | 21.4304(11)                                       |
| $\alpha/^\circ$   | 90                                                |

|                                               |                                                                |
|-----------------------------------------------|----------------------------------------------------------------|
| $\beta/^\circ$                                | 96.909(6)                                                      |
| $\gamma/^\circ$                               | 90                                                             |
| Volume/ $\text{\AA}^3$                        | 1819.75(19)                                                    |
| Z                                             | 4                                                              |
| $\rho_{\text{calc}}/\text{cm}^3$              | 1.269                                                          |
| $\mu/\text{mm}^{-1}$                          | 0.228                                                          |
| F(000)                                        | 728.0                                                          |
| Crystal size/ $\text{mm}^3$                   | $0.23 \times 0.2 \times 0.17$                                  |
| Radiation                                     | Mo K $\alpha$ ( $\lambda = 0.71073$ )                          |
| $2\Theta$ range for data collection/ $^\circ$ | 3.828 to 65.884                                                |
| Index ranges                                  | $-12 \leq h \leq 12, -15 \leq k \leq 15, -32 \leq l \leq 31$   |
| Reflections collected                         | 22992                                                          |
| Independent reflections                       | 11704 [ $R_{\text{int}} = 0.0679, R_{\text{sigma}} = 0.1339$ ] |
| Data/restraints/parameters                    | 11704/7/456                                                    |
| Goodness-of-fit on $F^2$                      | 1.024                                                          |
| Final R indexes [ $I \geq 2\sigma(I)$ ]       | $R_1 = 0.0677, wR_2 = 0.1228$                                  |
| Final R indexes [all data]                    | $R_1 = 0.1428, wR_2 = 0.1648$                                  |
| Largest diff. peak/hole / $e \text{\AA}^{-3}$ | 0.26/-0.26                                                     |
| Flack parameter                               | 0.05(7)                                                        |

## 11. Confirm Absolute Configurations of (*R, S*)-**5b** by ECD Spectra.

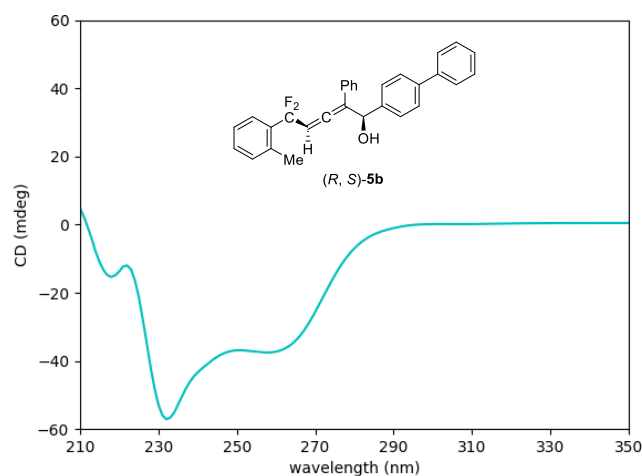

Figure 1. Experimental ECD spectrum of (-)-**5b**  
 (The experimental spectra were measured at a concentration of 0.2 mg/mL in  $\text{CHCl}_3$  solvent and 0.1 cm path length.)

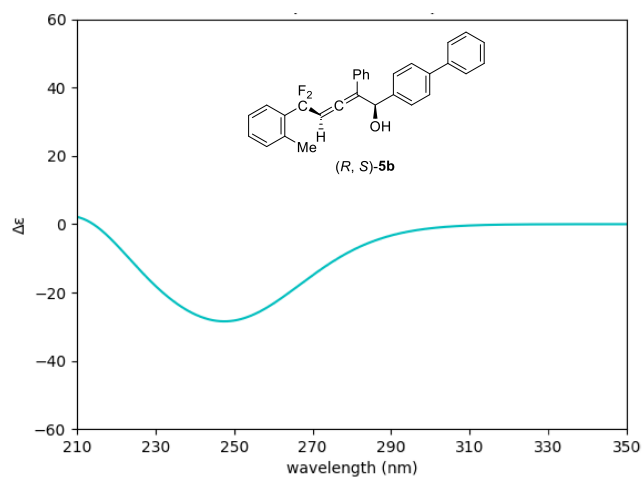

## 12. NMR Spectra for New Compounds

*N'*-(1,1-difluoro-1,4-diphenylbut-3-yn-2-ylidene)-2-(trifluoromethyl)benzenesulfonylhydrazide (1a):  $^1\text{H}$  NMR (400 MHz,  $\text{CDCl}_3$ )

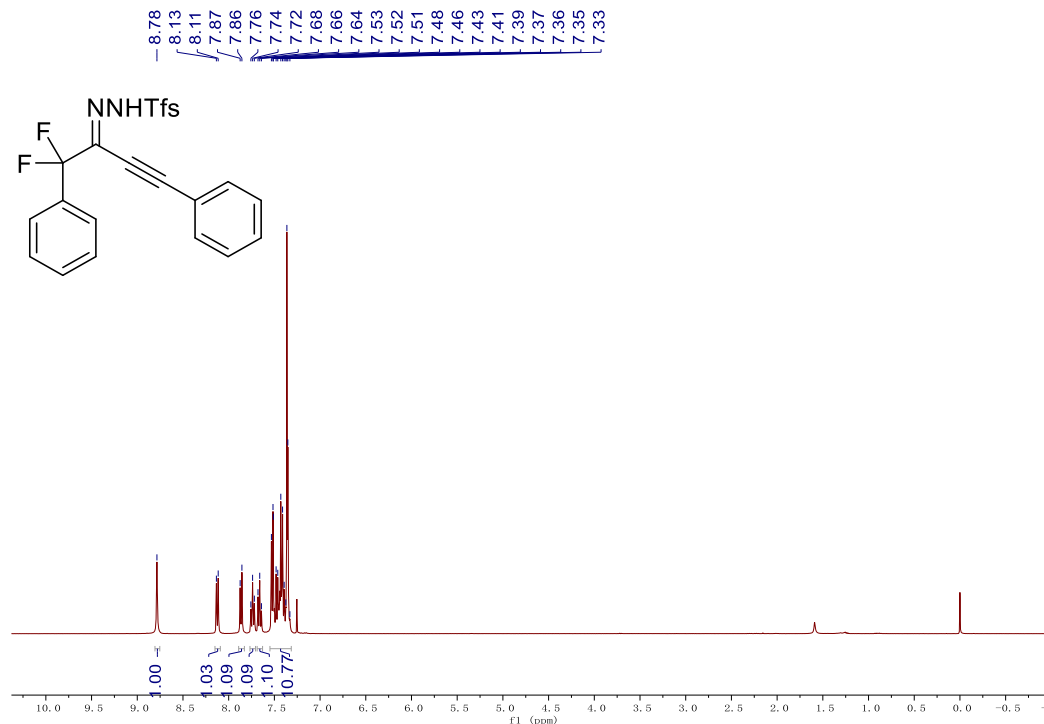

*N'*-(1,1-difluoro-1,4-diphenylbut-3-yn-2-ylidene)-2-(trifluoromethyl)benzenesulfonylhydrazide (1a):  $^{13}\text{C}$  NMR (101 MHz,  $\text{CDCl}_3$ )

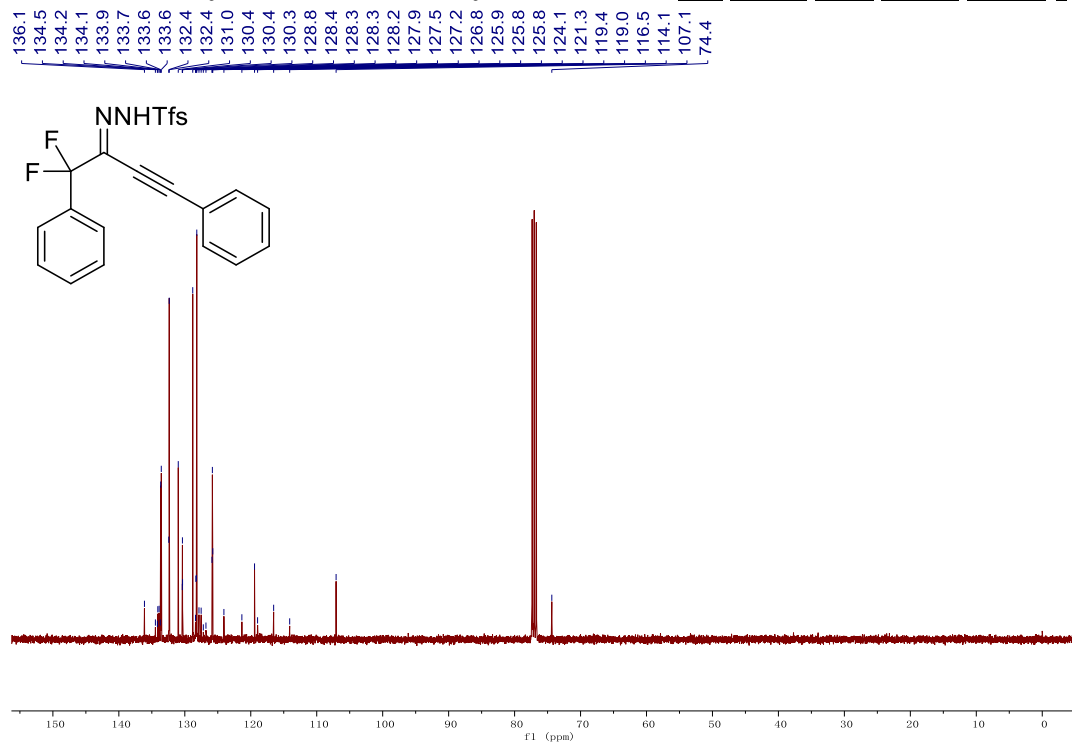

***N'*-(1,1-difluoro-1,4-diphenylbut-3-yn-2-ylidene)-2-(trifluoromethyl)benzenesulfonylhydrazide (1a):  $^{19}\text{F}$  NMR (376 MHz,  $\text{CDCl}_3$ )**

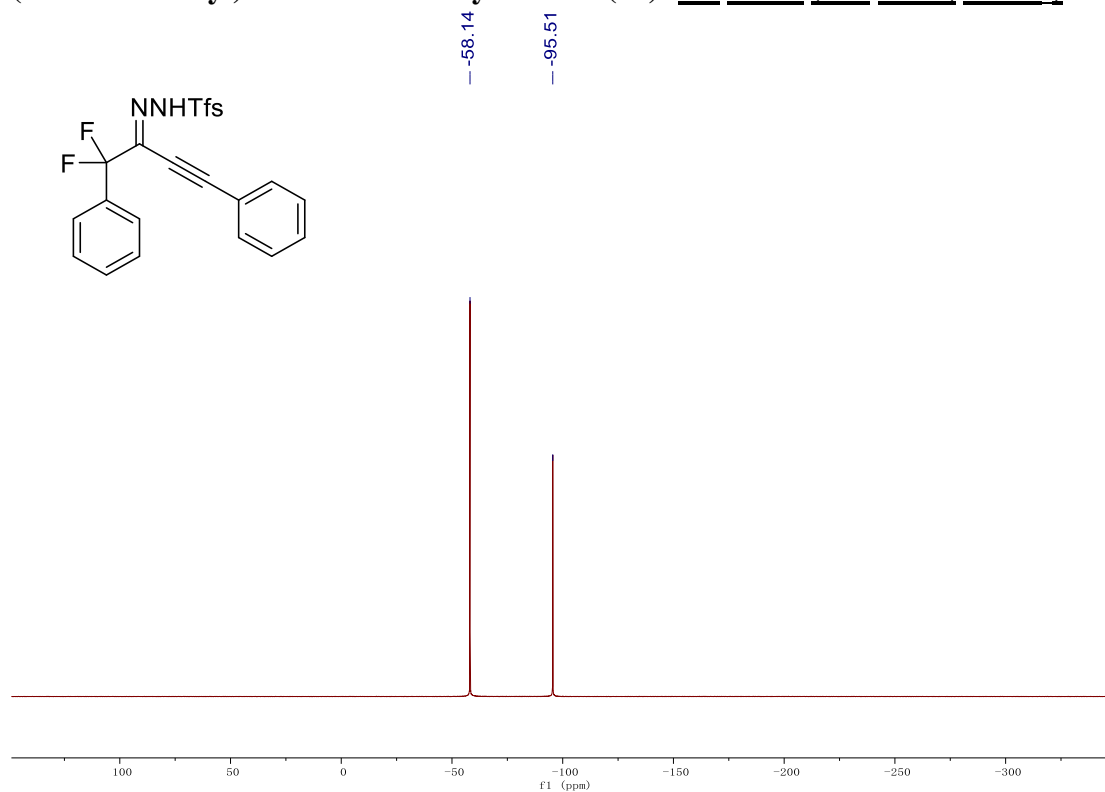

***N'*-(1,1-difluoro-4-phenyl-1-(*o*-tolyl)but-3-yn-2-ylidene)-2-(trifluoromethyl)benzenesulfonylhydrazide (1b):  $^1\text{H}$  NMR (400 MHz,  $\text{CDCl}_3$ )**

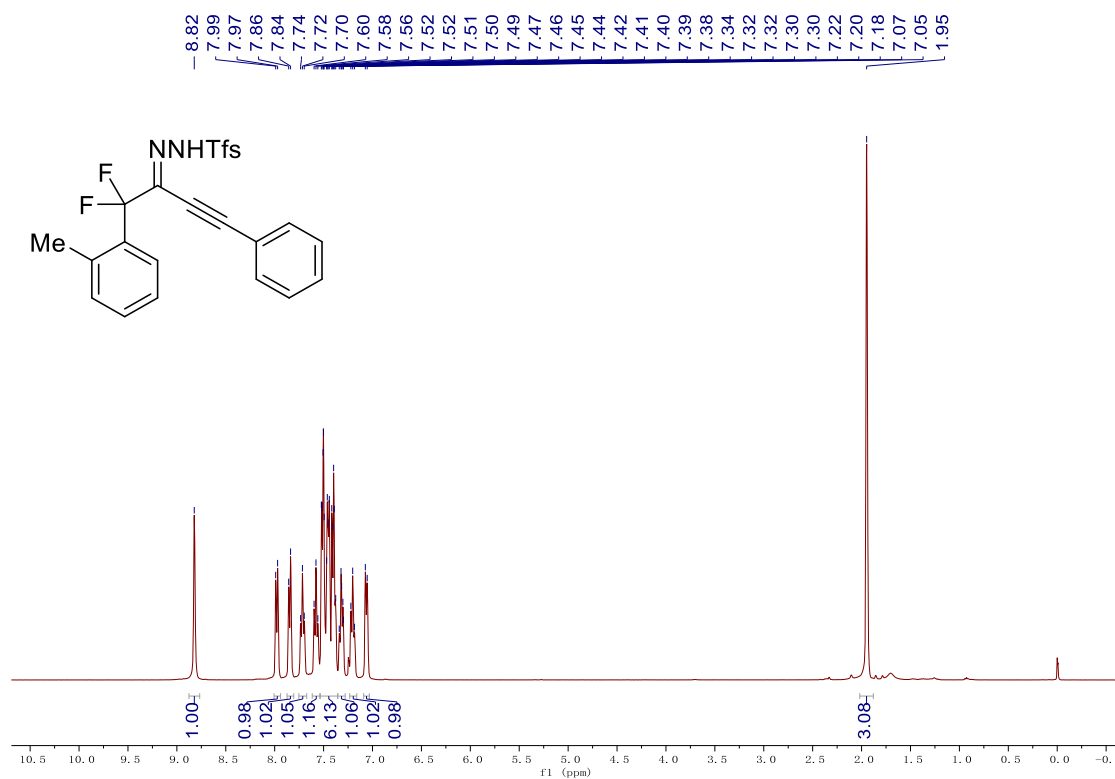

***N'*-(1,1-difluoro-4-phenyl-1-(*o*-tolyl)but-3-yn-2-ylidene)-2-(trifluoromethyl)benzenesulfonylhydrazone (1b): <sup>13</sup>C NMR (101 MHz, CDCl<sub>3</sub>)**

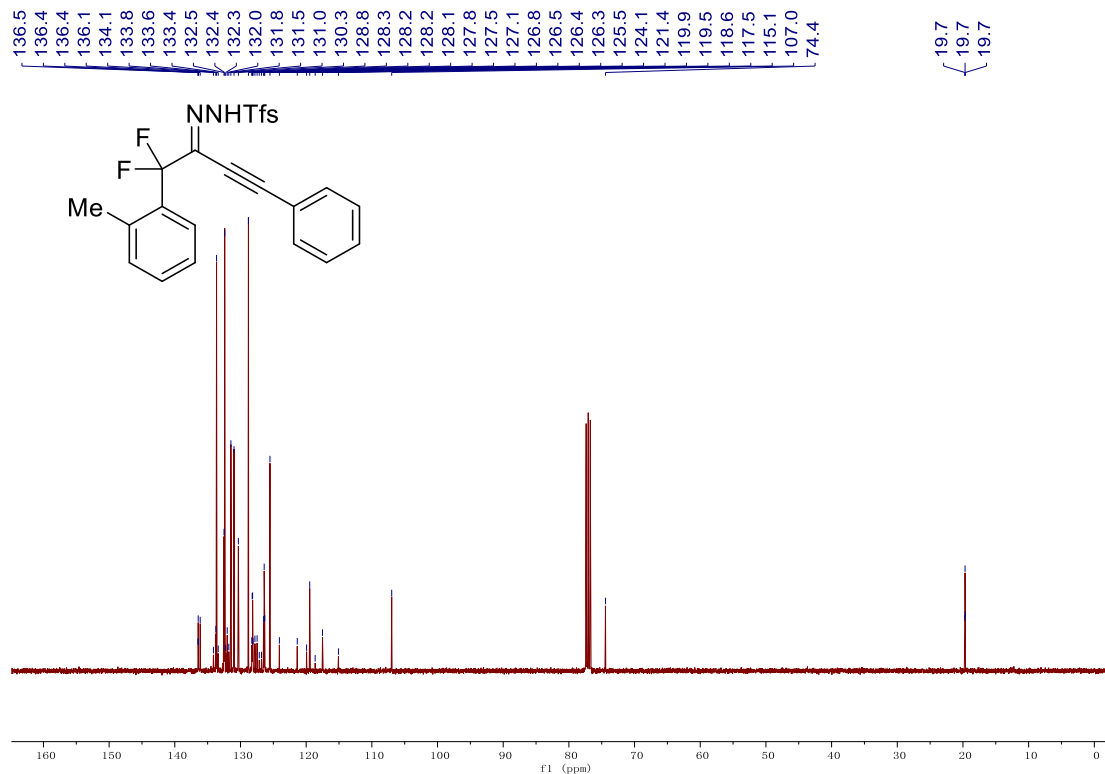

***N'*-(1,1-difluoro-4-phenyl-1-(*o*-tolyl)but-3-yn-2-ylidene)-2-(trifluoromethyl)benzenesulfonylhydrazone (1b): <sup>19</sup>F NMR (376 MHz, CDCl<sub>3</sub>)**

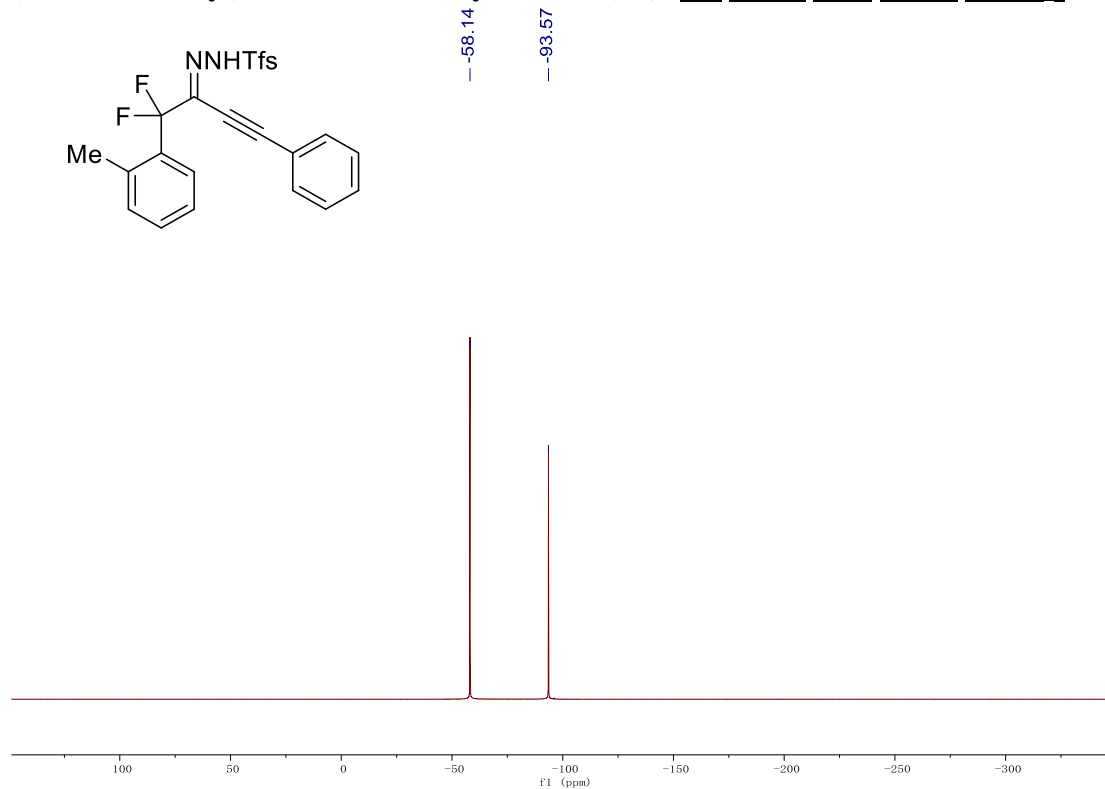

***N'*-(1,1-difluoro-4-phenyl-1-(*m*-tolyl)but-3-yn-2-ylidene)-2-(trifluoromethyl)benzenesulfonylhydrazide (1c): <sup>1</sup>H NMR (400 MHz, CDCl<sub>3</sub>)**

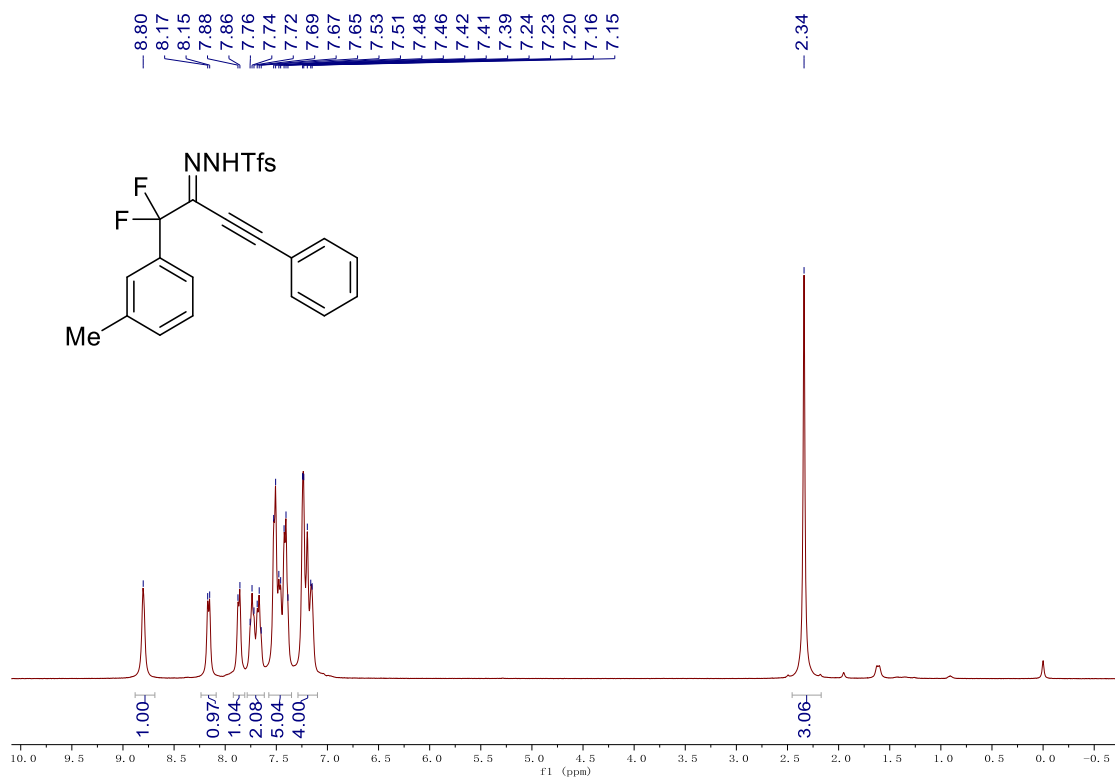

***N'*-(1,1-difluoro-4-phenyl-1-(*m*-tolyl)but-3-yn-2-ylidene)-2-(trifluoromethyl)benzenesulfonylhydrazide (1c): <sup>13</sup>C NMR (101 MHz, CDCl<sub>3</sub>)**

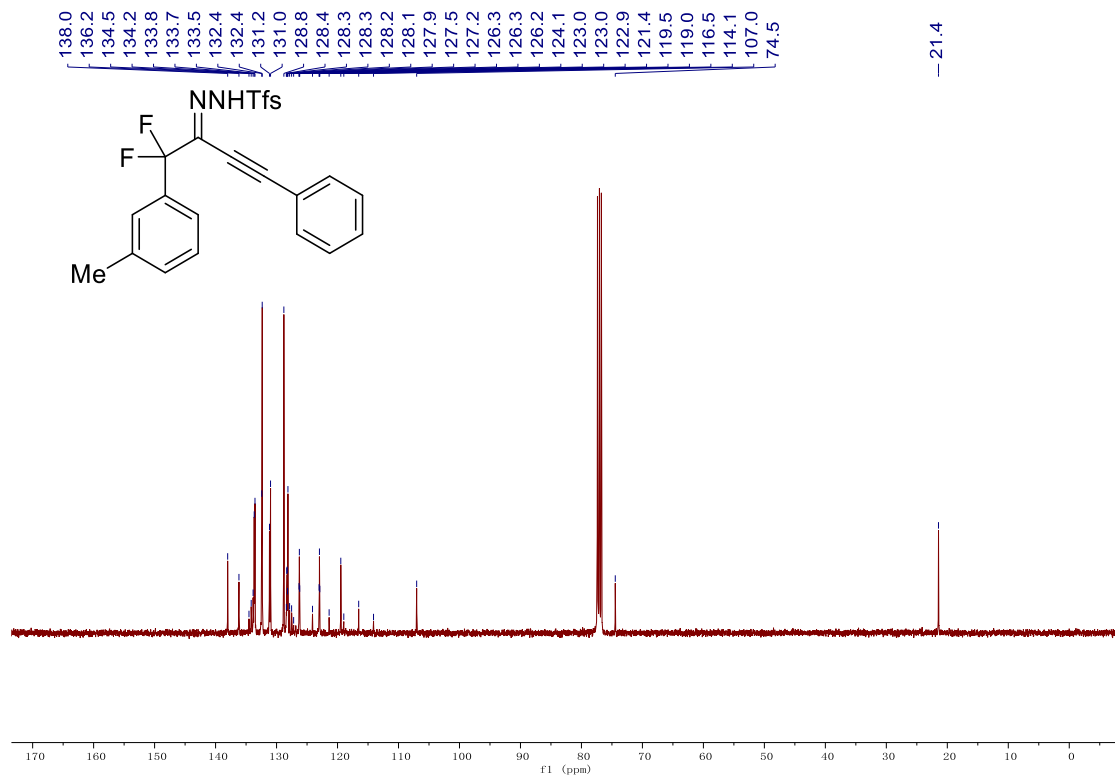



***N'*-(1,1-difluoro-4-phenyl-1-(*m*-tolyl)but-3-yn-2-ylidene)-2-(trifluoromethyl)benzenesulfonylhydrazide (1c): <sup>19</sup>F NMR (376 MHz, CDCl<sub>3</sub>)**

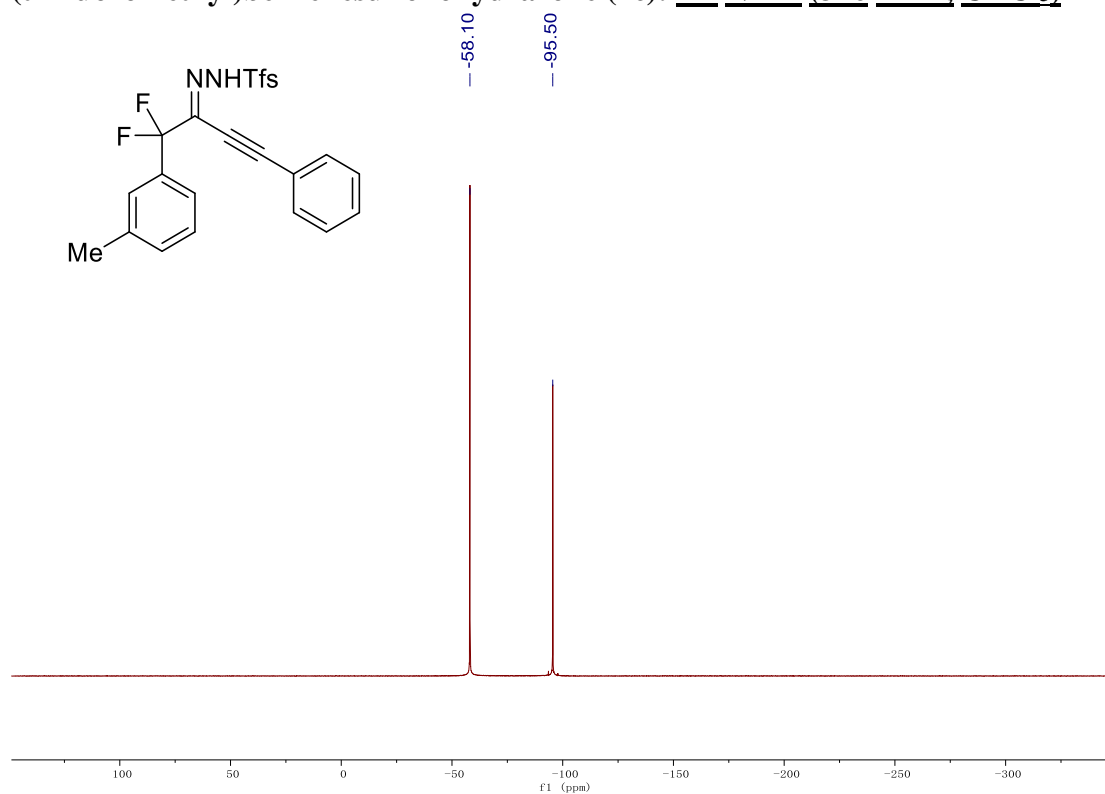

***N'*-(1-(2-chlorophenyl)-1,1-difluoro-4-phenylbut-3-yn-2-ylidene)-2-(trifluoromethyl)benzenesulfonylhydrazide (1d): <sup>1</sup>H NMR (400 MHz, CDCl<sub>3</sub>)**

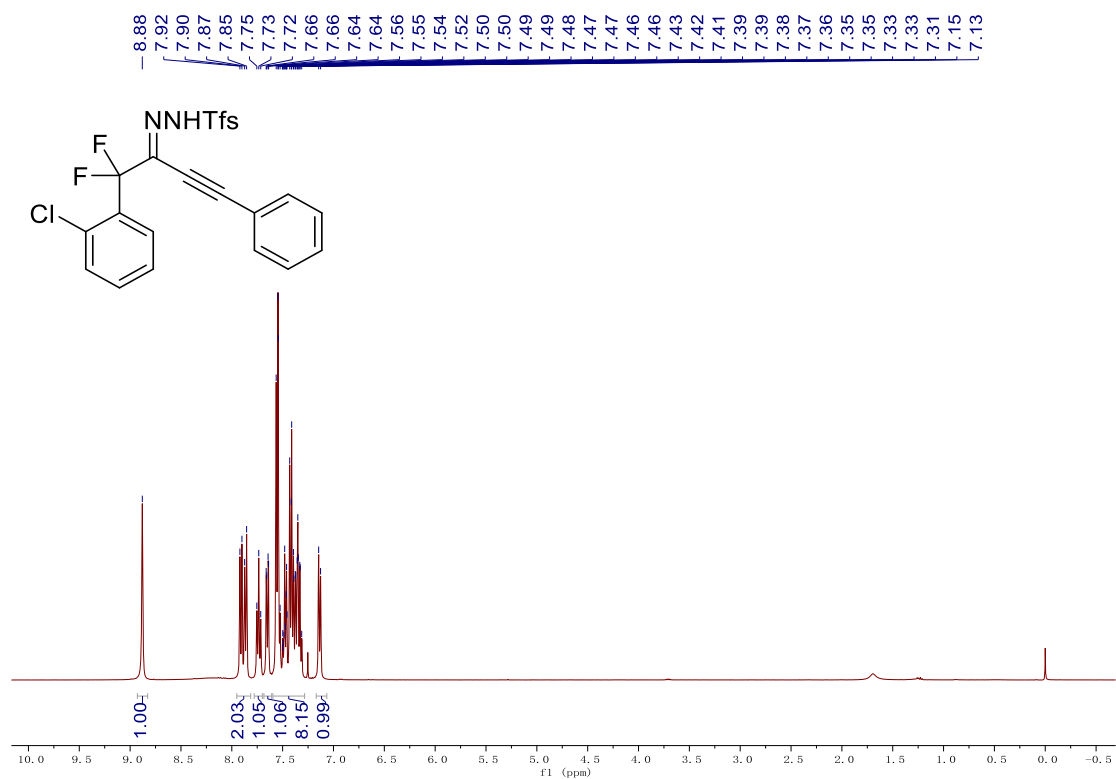

***N'*-(1-(2-chlorophenyl)-1,1-difluoro-4-phenylbut-3-yn-2-ylidene)-2-(trifluoromethyl)benzenesulfonylhydrazine (1d):  $^{13}\text{C}$  NMR (101 MHz,  $\text{CDCl}_3$ )**

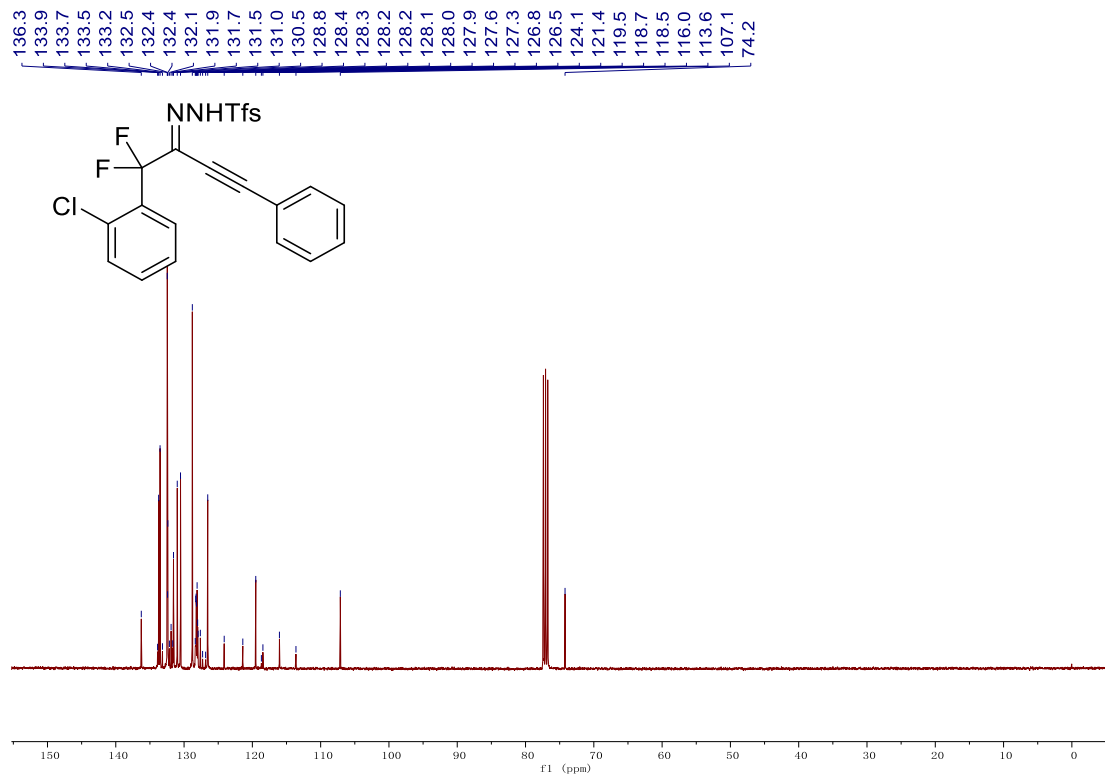

***N'*-(1-(2-chlorophenyl)-1,1-difluoro-4-phenylbut-3-yn-2-ylidene)-2-(trifluoromethyl)benzenesulfonylhydrazine (1d):  $^{19}\text{F}$  NMR (376 MHz,  $\text{CDCl}_3$ )**

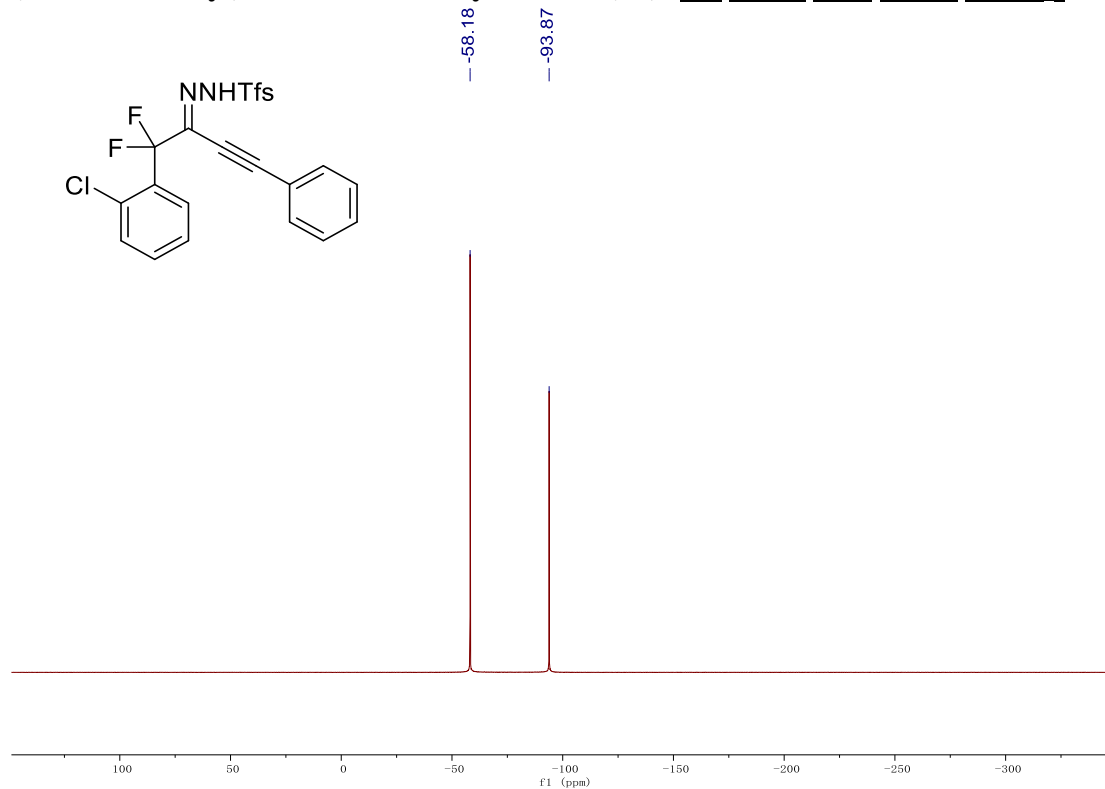

***N'*-(1-(3-chlorophenyl)-1,1-difluoro-4-phenylbut-3-yn-2-ylidene)-2-(trifluoromethyl)benzenesulfonohydrazone (1e): <sup>1</sup>H NMR (400 MHz, CDCl<sub>3</sub>)**

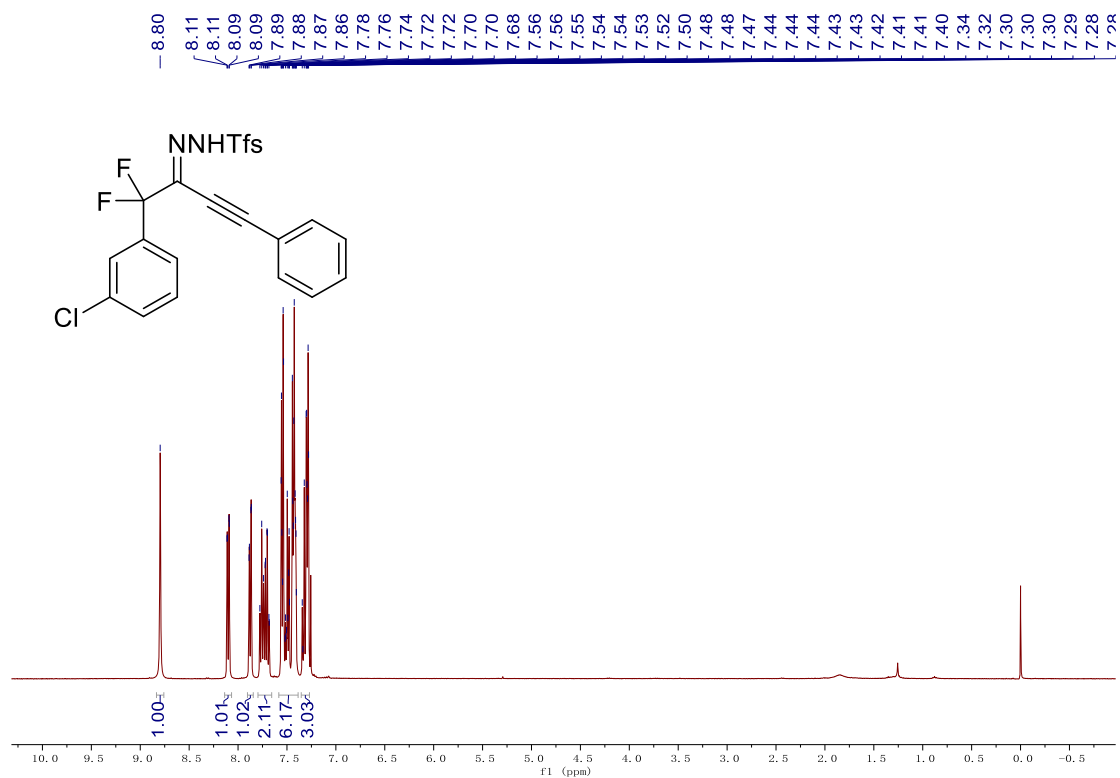

***N'*-(1-(3-chlorophenyl)-1,1-difluoro-4-phenylbut-3-yn-2-ylidene)-2-(trifluoromethyl)benzenesulfonohydrazone (1e): <sup>13</sup>C NMR (101 MHz, CDCl<sub>3</sub>)**

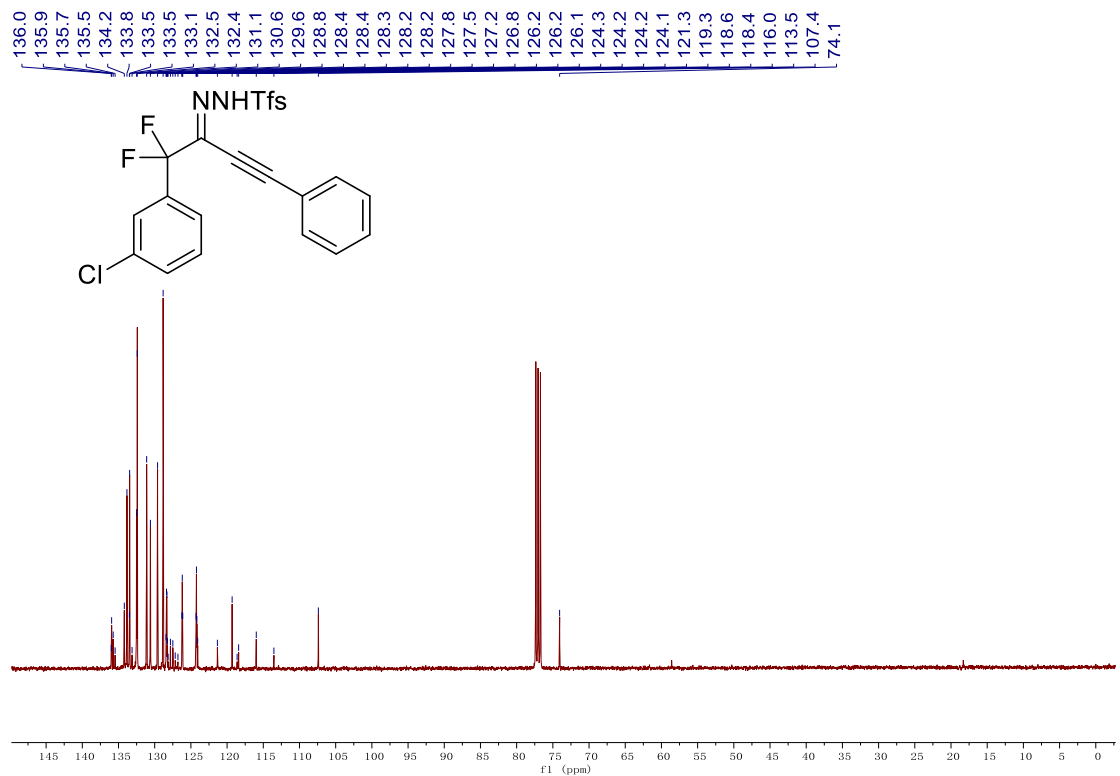

***N'*-(1-(3-chlorophenyl)-1,1-difluoro-4-phenylbut-3-yn-2-ylidene)-2-(trifluoromethyl)benzenesulfonylhydrazide (1e): <sup>19</sup>F NMR (376 MHz, CDCl<sub>3</sub>)**

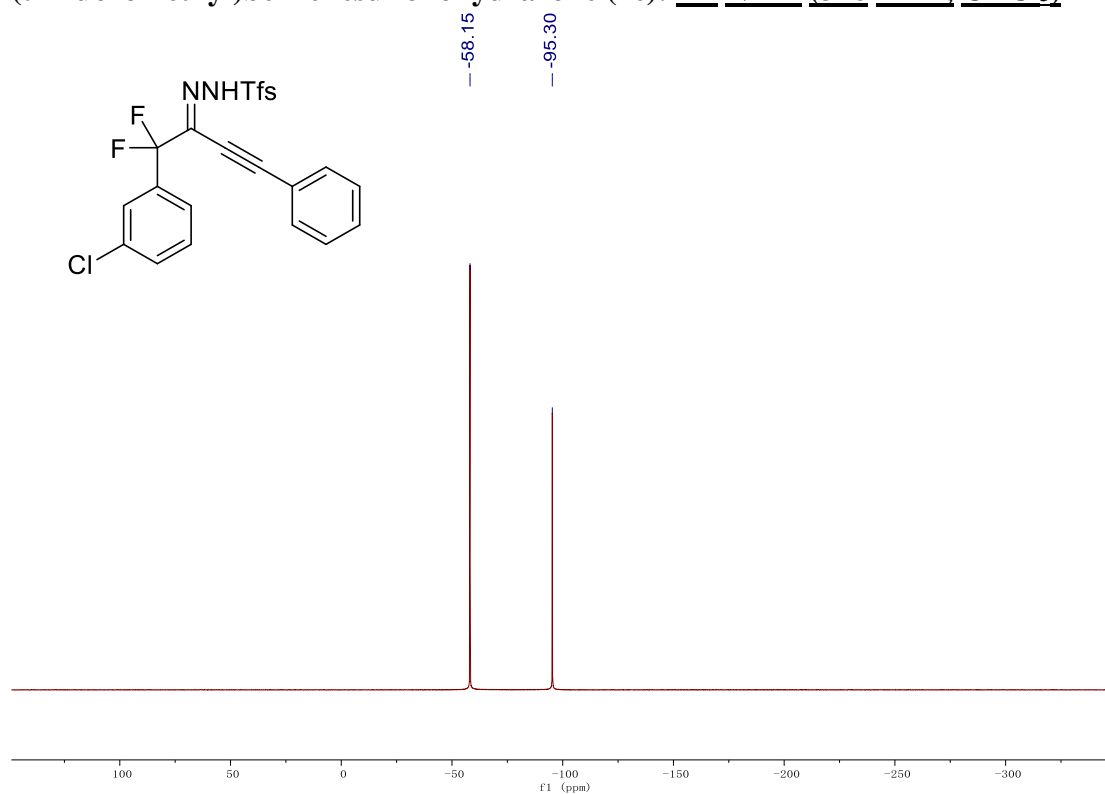

***N'*-(1-(4-chlorophenyl)-1,1-difluoro-4-phenylbut-3-yn-2-ylidene)-2-(trifluoromethyl)benzenesulfonylhydrazide (1f): <sup>1</sup>H NMR (400 MHz, CDCl<sub>3</sub>)**

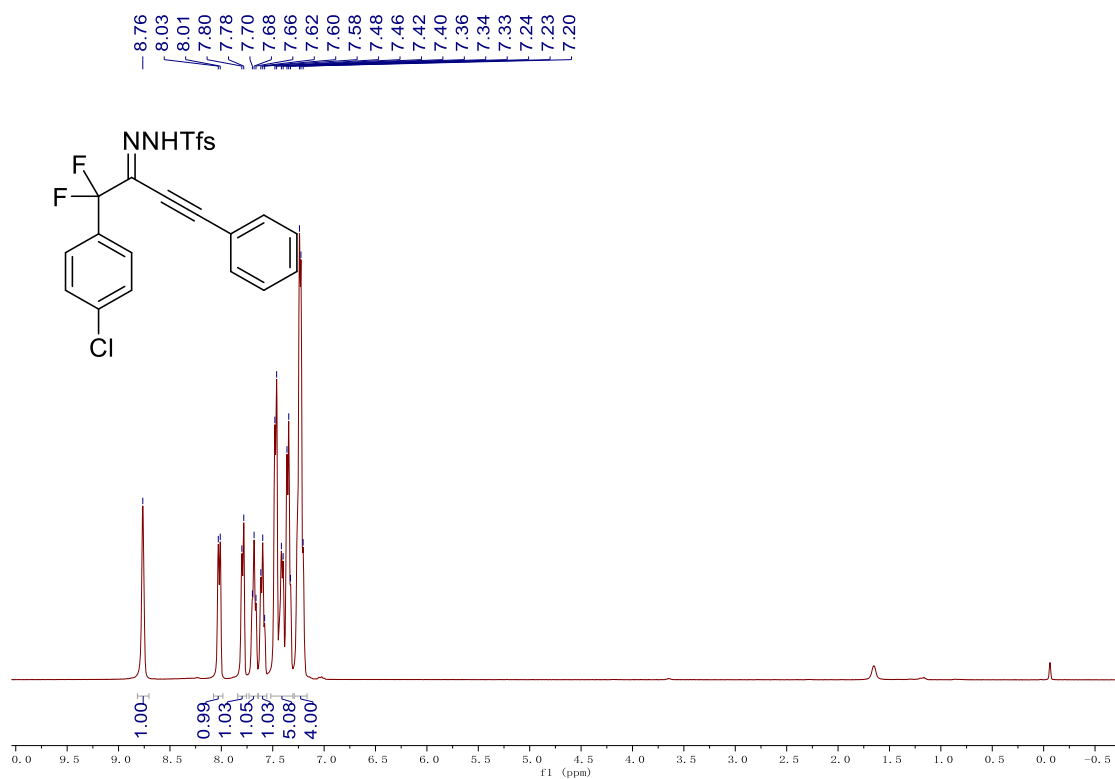

***N'*-(1-(4-chlorophenyl)-1,1-difluoro-4-phenylbut-3-yn-2-ylidene)-2-(trifluoromethyl)benzenesulfonylhydrazone (1f): <sup>13</sup>C NMR (101 MHz, CDCl<sub>3</sub>)**

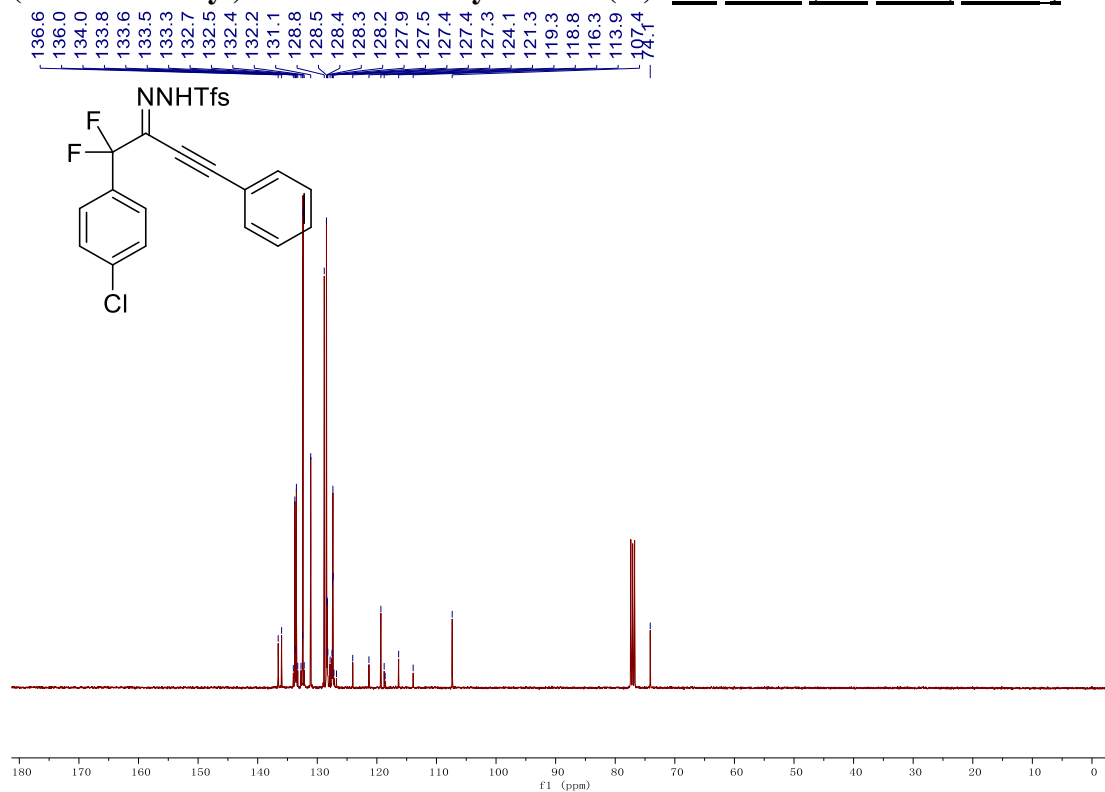

***N'*-(1-(4-chlorophenyl)-1,1-difluoro-4-phenylbut-3-yn-2-ylidene)-2-(trifluoromethyl)benzenesulfonylhydrazone (1f): <sup>19</sup>F NMR (376 MHz, CDCl<sub>3</sub>)**

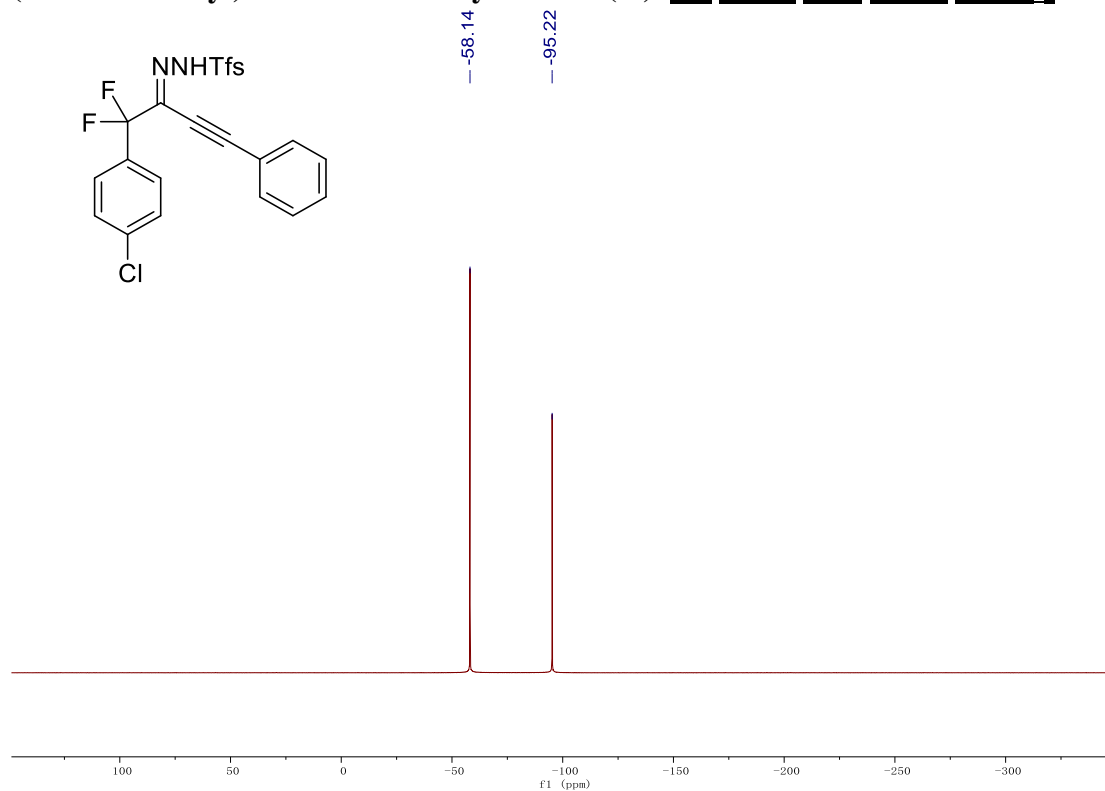

***N'*-(1,1-difluoro-1-(2-fluorophenyl)-4-phenylbut-3-yn-2-ylidene)-2-(trifluoromethyl)benzenesulfonylhydrazine (1g): <sup>1</sup>H NMR (400 MHz, CDCl<sub>3</sub>)**

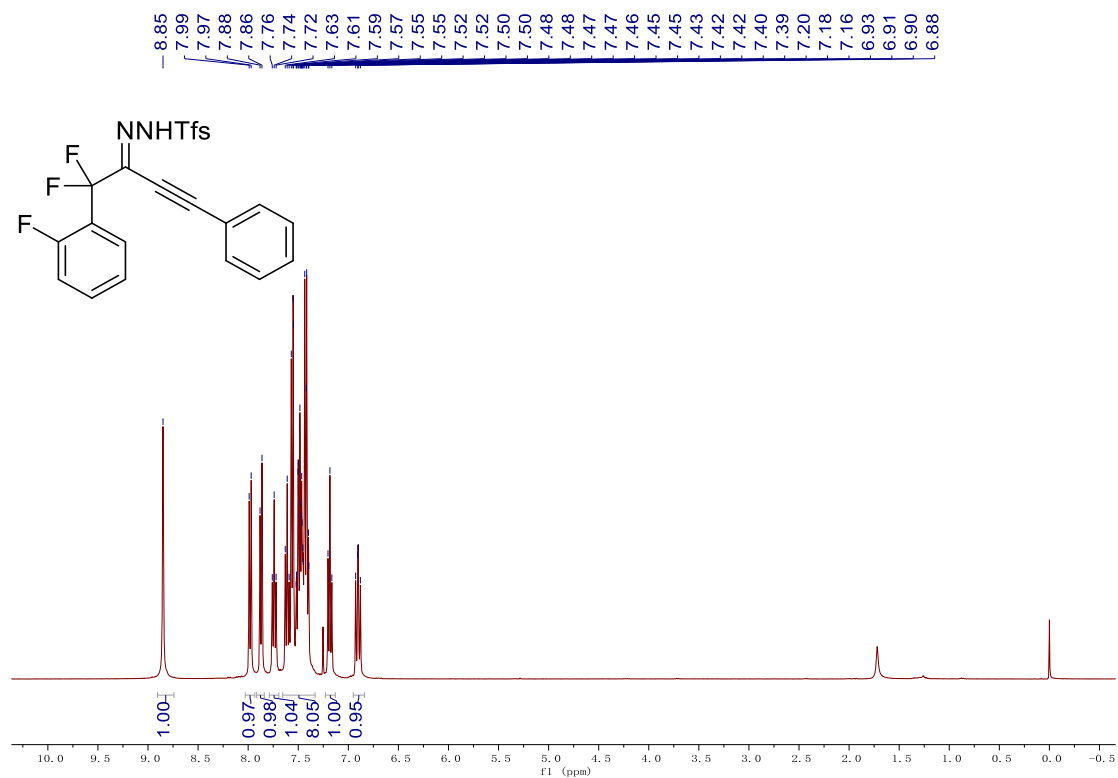

***N'*-(1,1-difluoro-1-(2-fluorophenyl)-4-phenylbut-3-yn-2-ylidene)-2-(trifluoromethyl)benzenesulfonylhydrazine (1g): <sup>13</sup>C NMR (101 MHz, CDCl<sub>3</sub>)**

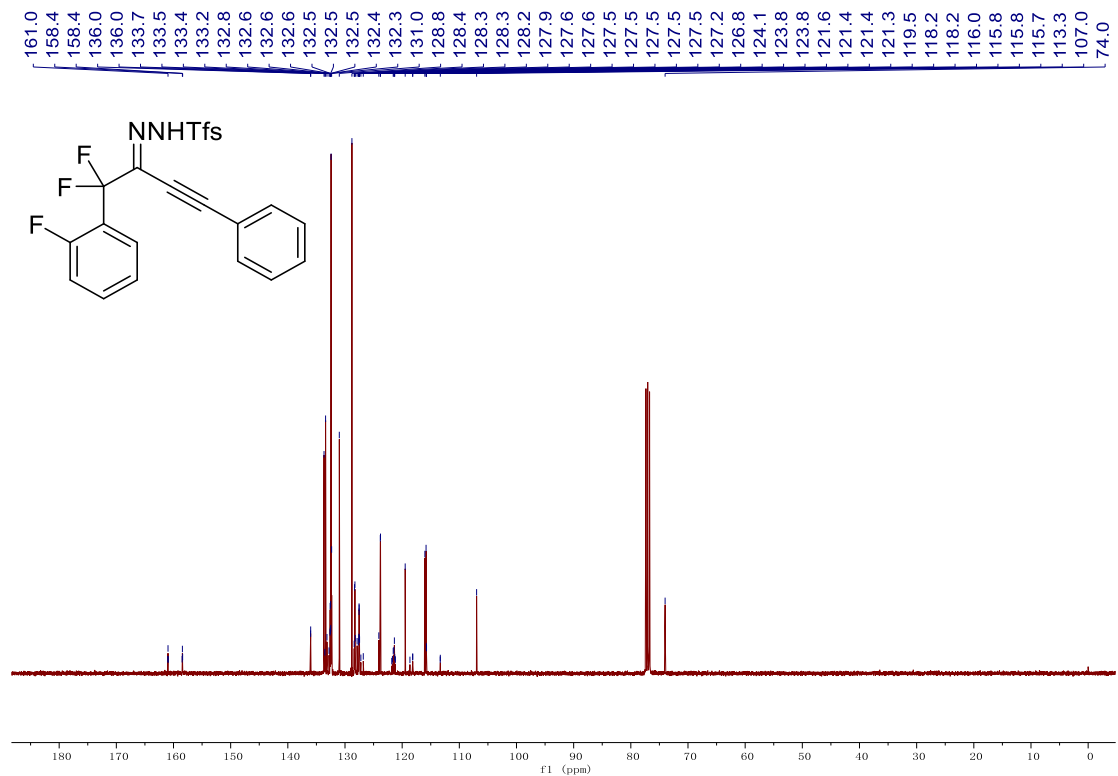

***N'*-(1,1-difluoro-1-(2-fluorophenyl)-4-phenylbut-3-yn-2-ylidene)-2-(trifluoromethyl)benzenesulfonylhydrazide (1g): <sup>19</sup>F NMR (376 MHz, CDCl<sub>3</sub>)**

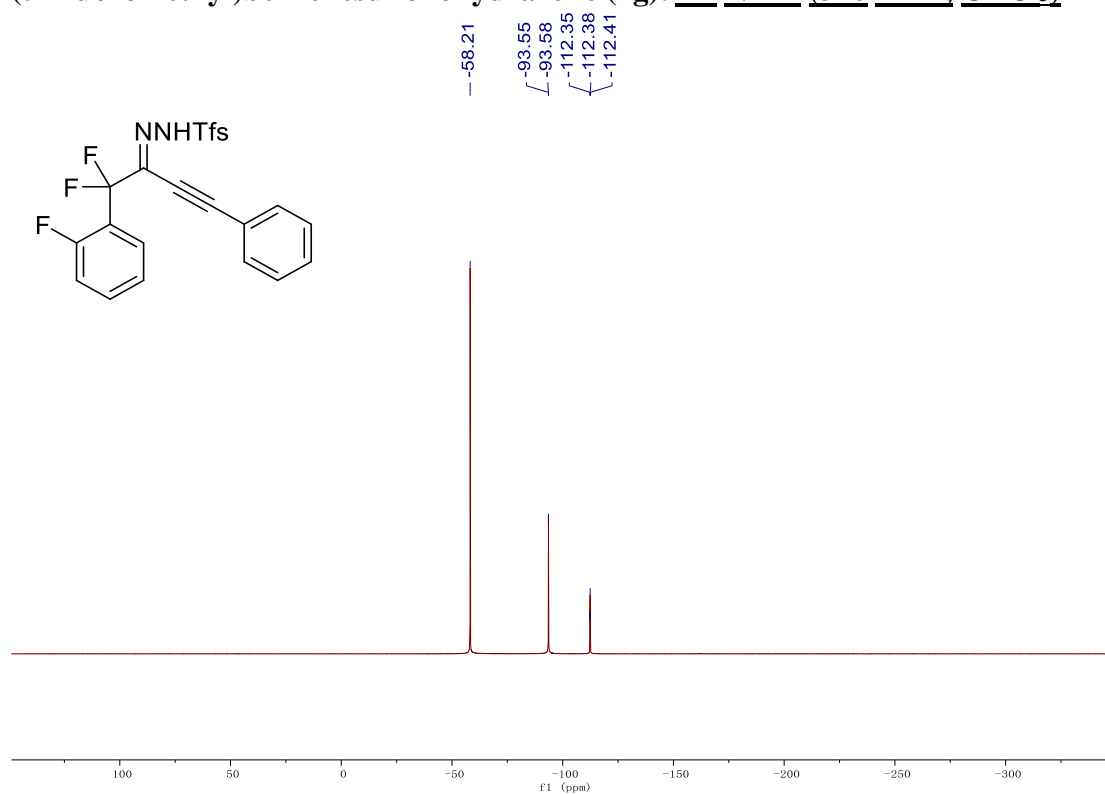

***N'*-(1,1-difluoro-1-(naphthalen-1-yl)-4-phenylbut-3-yn-2-ylidene)-2-(trifluoromethyl)benzenesulfonylhydrazide (1h): <sup>1</sup>H NMR (400 MHz, CDCl<sub>3</sub>)**

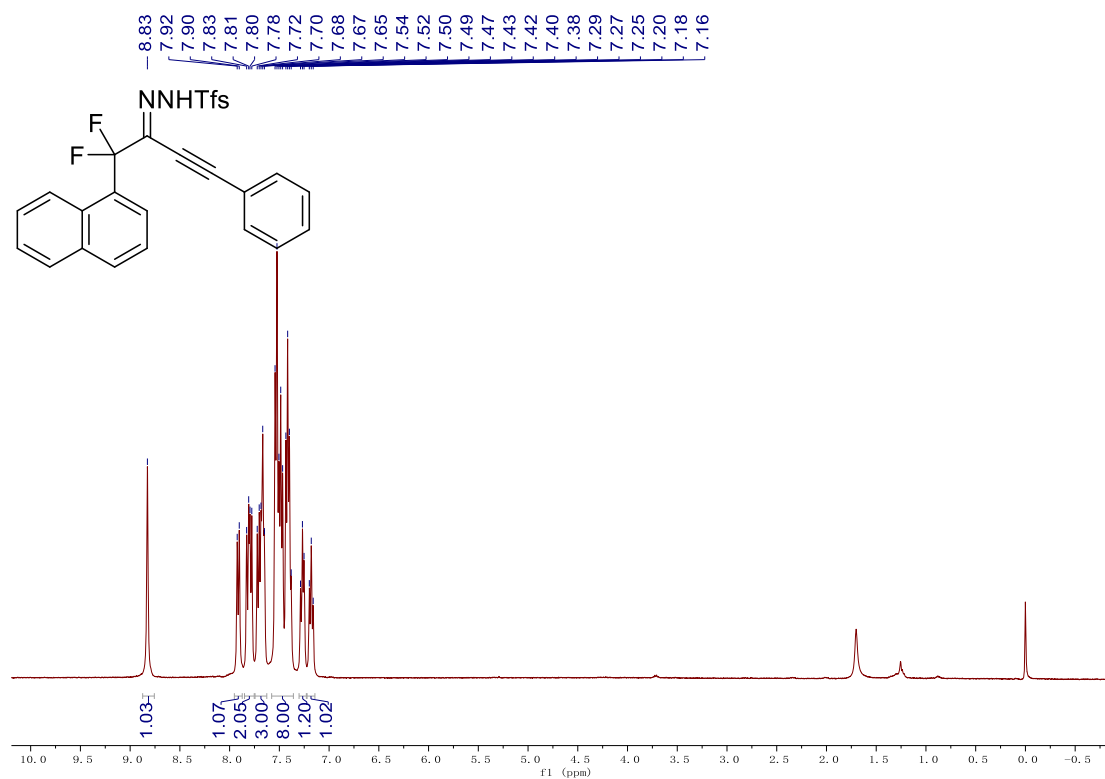

***N'*-(1,1-difluoro-1-(naphthalen-1-yl)-4-phenylbut-3-yn-2-ylidene)-2-(trifluoromethyl)benzenesulfonylhydrazone (1h): <sup>13</sup>C NMR (101 MHz, CDCl<sub>3</sub>)**

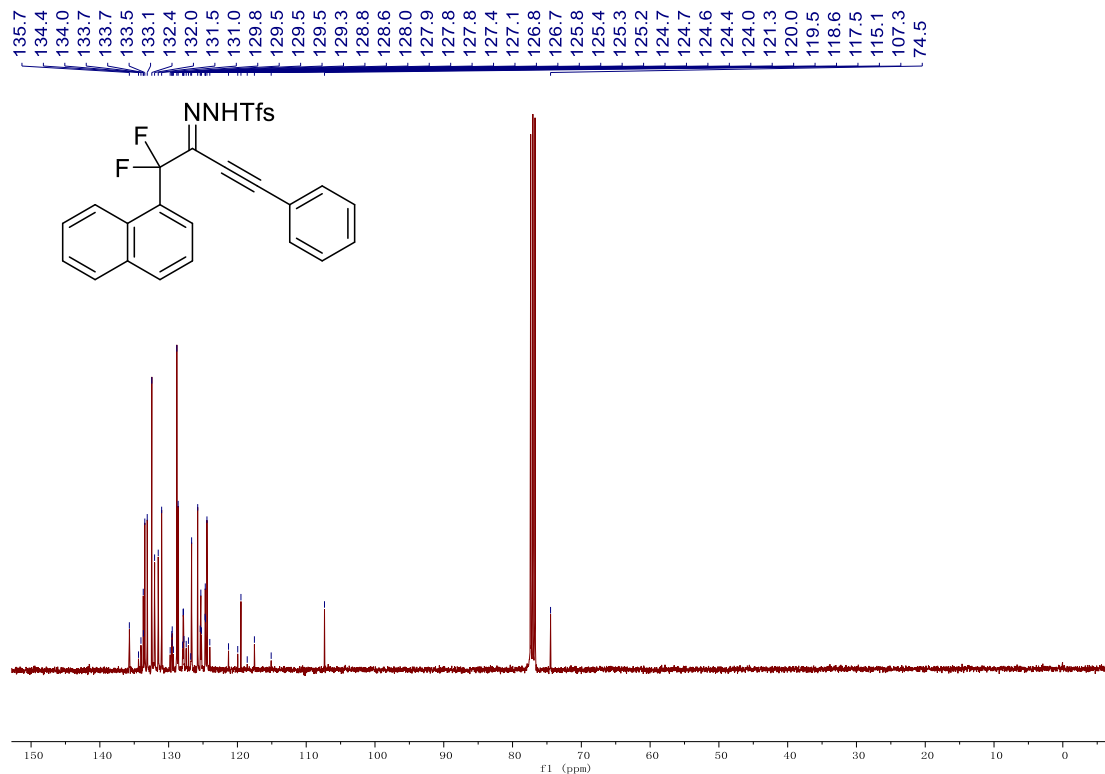

***N'*-(1,1-difluoro-1-(naphthalen-1-yl)-4-phenylbut-3-yn-2-ylidene)-2-(trifluoromethyl)benzenesulfonylhydrazone (1h): <sup>19</sup>F NMR (376 MHz, CDCl<sub>3</sub>)**

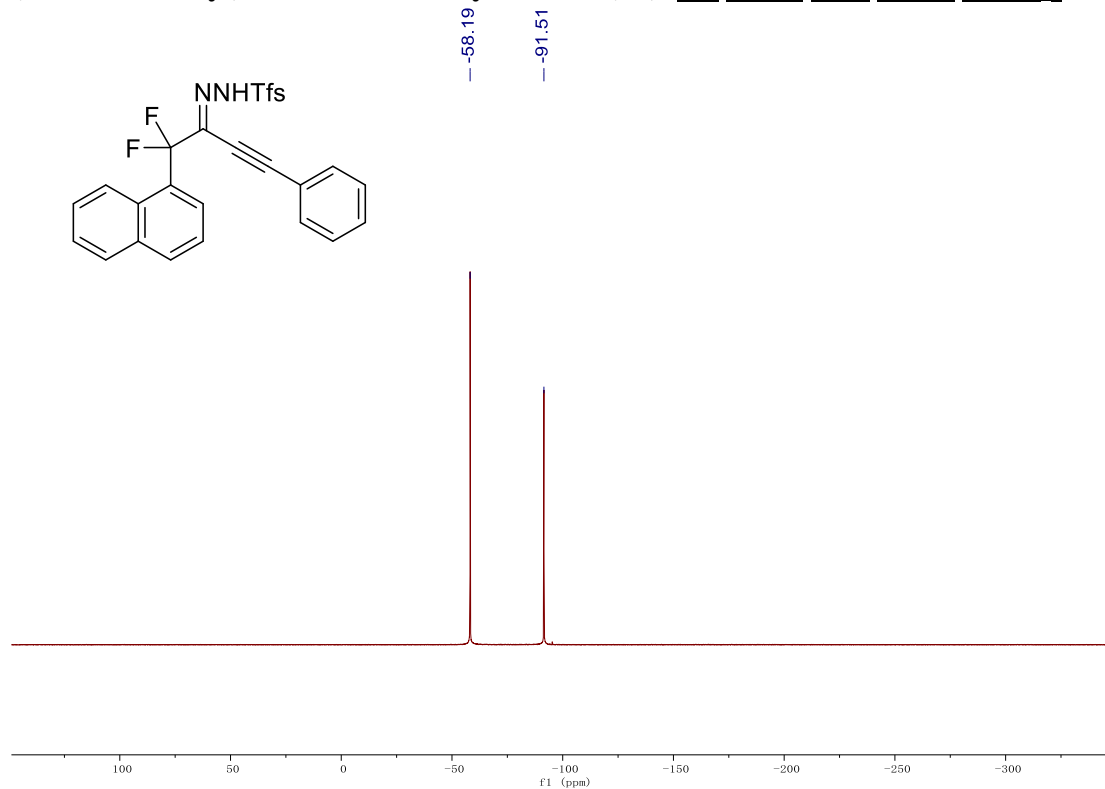



***N'*-(1,1-difluoro-1-(4-nitrophenyl)-4-phenylbut-3-yn-2-ylidene)-2-(trifluoromethyl)benzenesulfonylhydrazide (1i): <sup>1</sup>H NMR (400 MHz, CDCl<sub>3</sub>)**

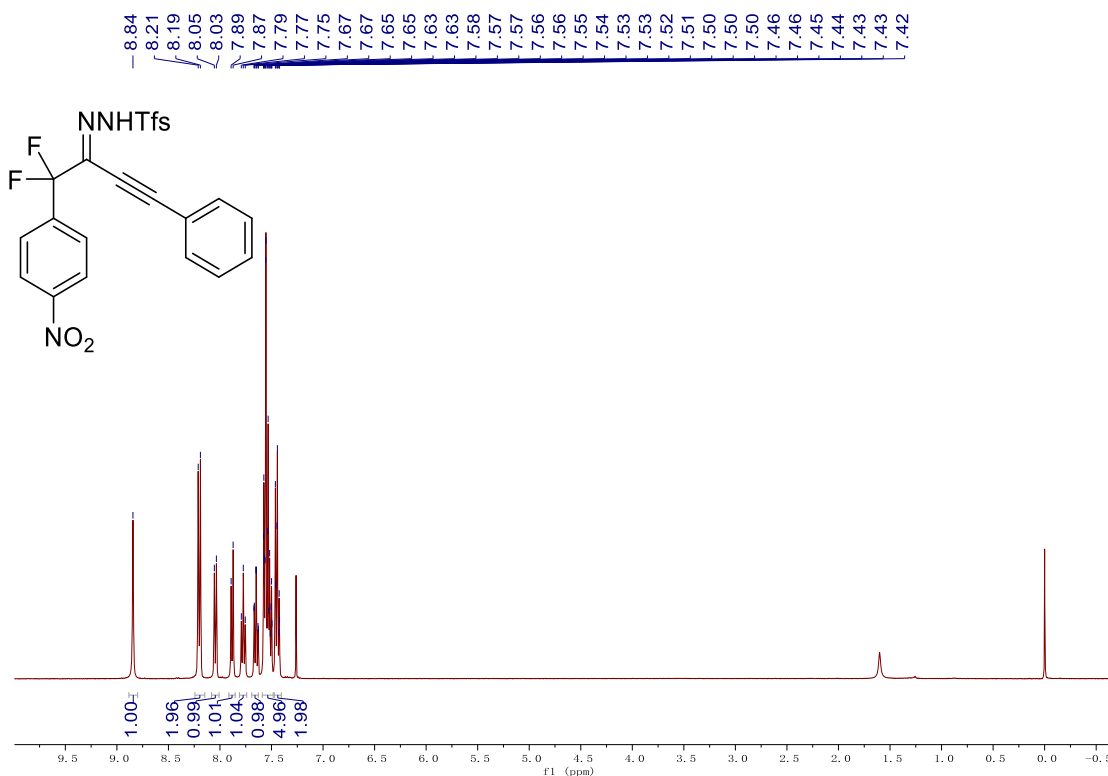

***N'*-(1,1-difluoro-1-(4-nitrophenyl)-4-phenylbut-3-yn-2-ylidene)-2-(trifluoromethyl)benzenesulfonylhydrazide (1i): <sup>13</sup>C NMR (101 MHz, CDCl<sub>3</sub>)**

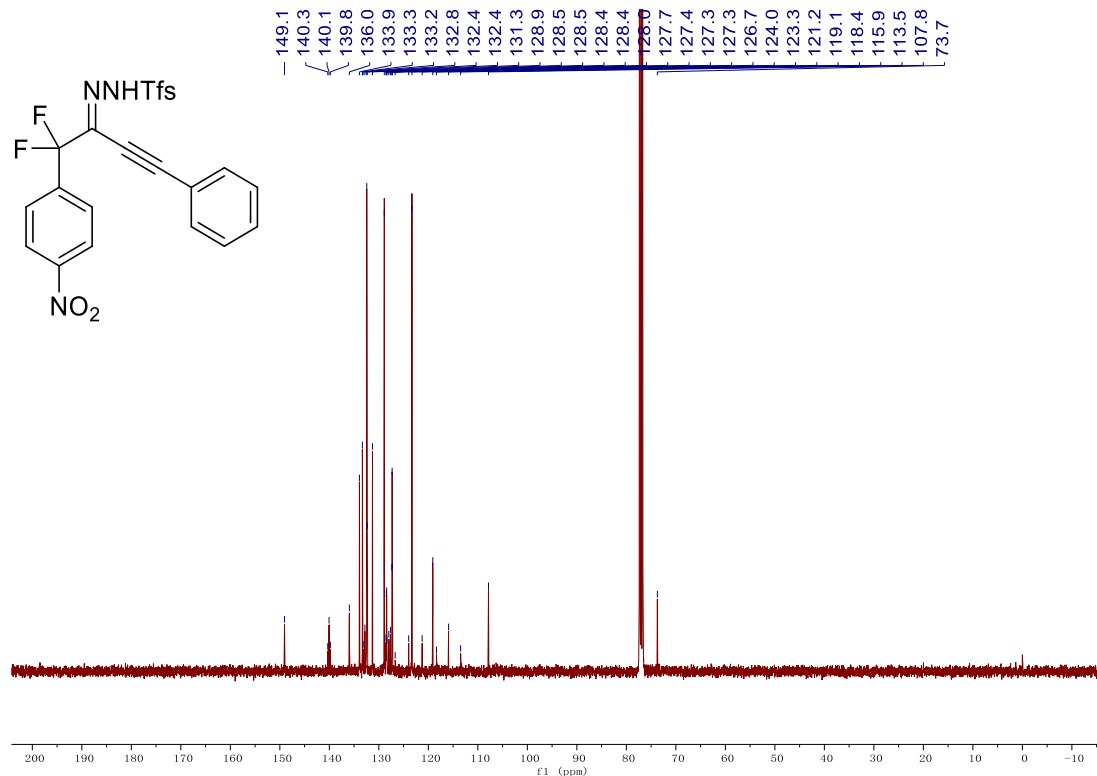

***N'*-(1,1-difluoro-1-(4-nitrophenyl)-4-phenylbut-3-yn-2-ylidene)-2-(trifluoromethyl)benzenesulfonylhydrazide (1i): <sup>19</sup>F NMR (376 MHz, CDCl<sub>3</sub>)**

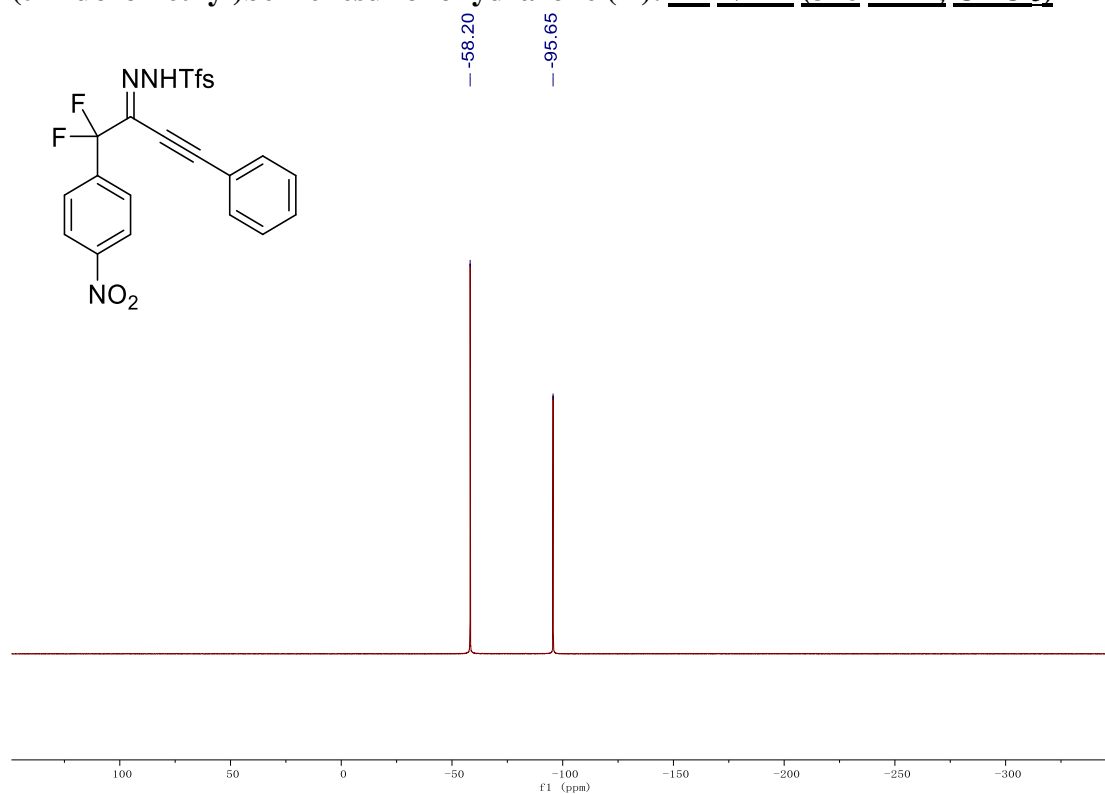

***N'*-(1,1-difluoro-1,4-di-*o*-tolylbut-3-yn-2-ylidene)-2-(trifluoromethyl)benzenesulfonylhydrazide (1j): <sup>1</sup>H NMR (400 MHz, CDCl<sub>3</sub>)**

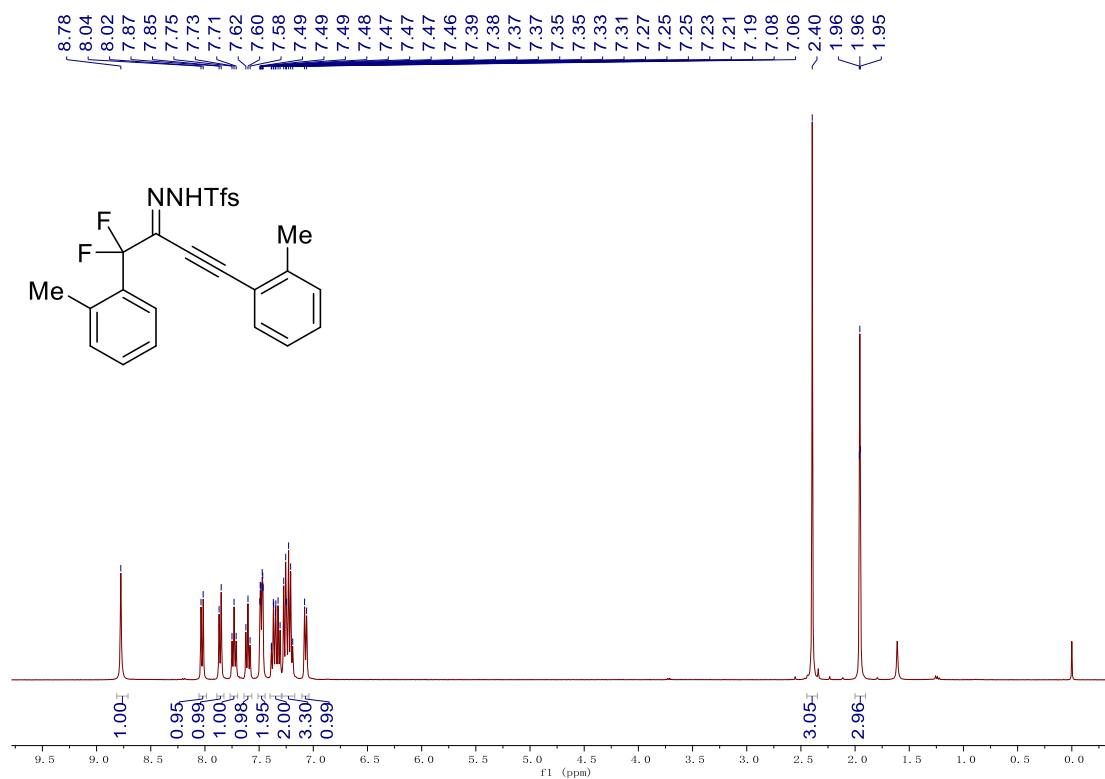

***N'*-(1,1-difluoro-1,4-di-*o*-tolylbut-3-yn-2-ylidene)-2-(trifluoromethyl)benzenesulfonylhydrazone (1j): <sup>13</sup>C NMR (101 MHz, CDCl<sub>3</sub>)**

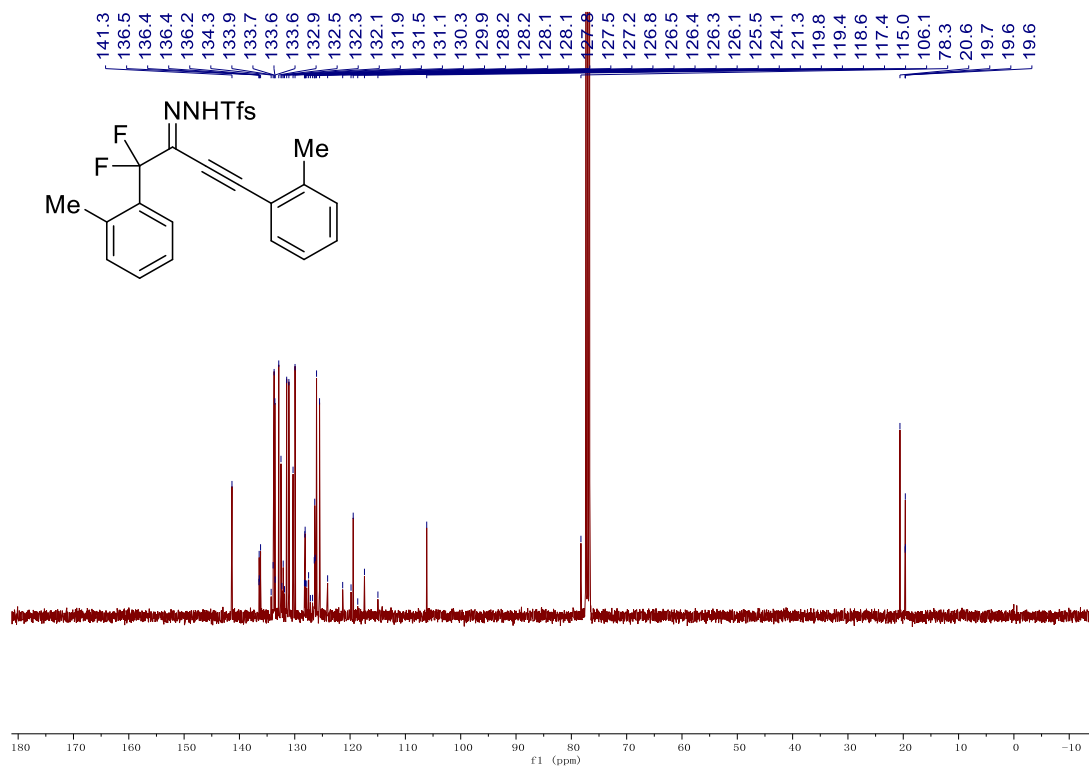

***N'*-(1,1-difluoro-1,4-di-*o*-tolylbut-3-yn-2-ylidene)-2-(trifluoromethyl)benzenesulfonylhydrazone (1j): <sup>19</sup>F NMR (376 MHz, CDCl<sub>3</sub>)**

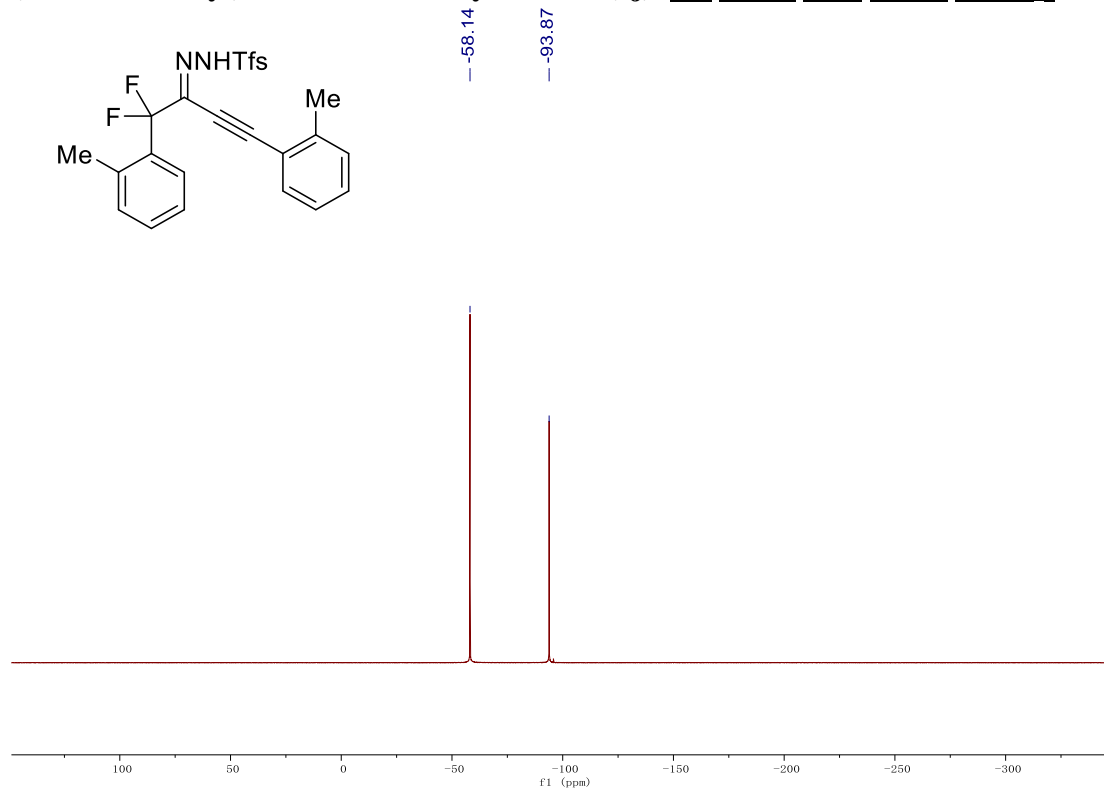

***N'*-(1,1-difluoro-4-(*m*-tolyl)-1-(*o*-tolyl)but-3-yn-2-ylidene)-2-(trifluoromethyl)benzenesulfonylhydrazone (1k): <sup>1</sup>H NMR (400 MHz, CDCl<sub>3</sub>)**

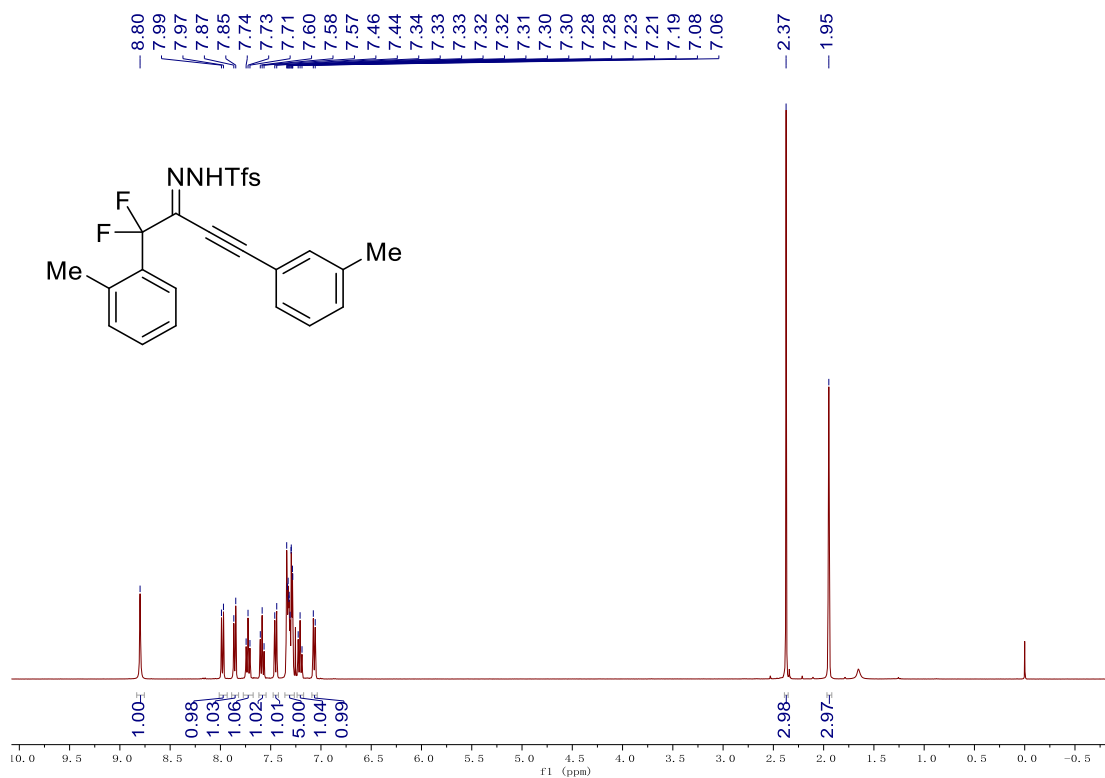

***N'*-(1,1-difluoro-4-(*m*-tolyl)-1-(*o*-tolyl)but-3-yn-2-ylidene)-2-(trifluoromethyl)benzenesulfonylhydrazone (1k): <sup>13</sup>C NMR (101 MHz, CDCl<sub>3</sub>)**

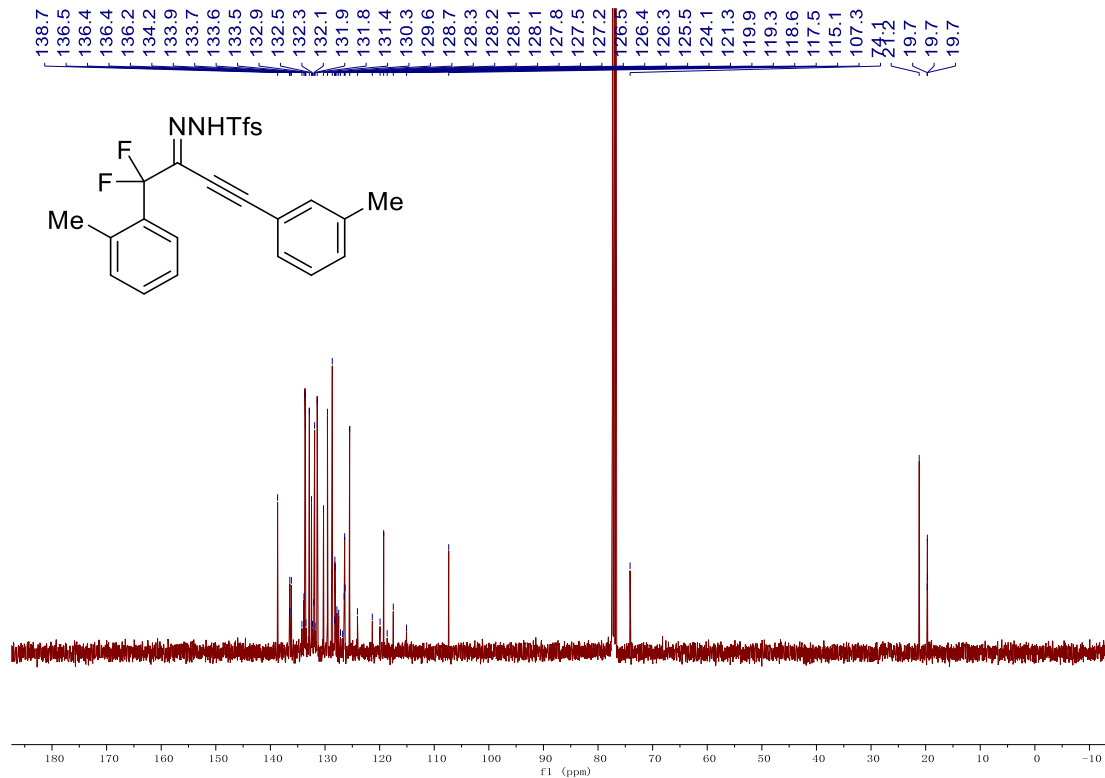

***N'*-(1,1-difluoro-4-(*m*-tolyl)-1-(*o*-tolyl)but-3-yn-2-ylidene)-2-(trifluoromethyl)benzenesulfonylhydrazide (1k): <sup>19</sup>F NMR (376 MHz, CDCl<sub>3</sub>)**

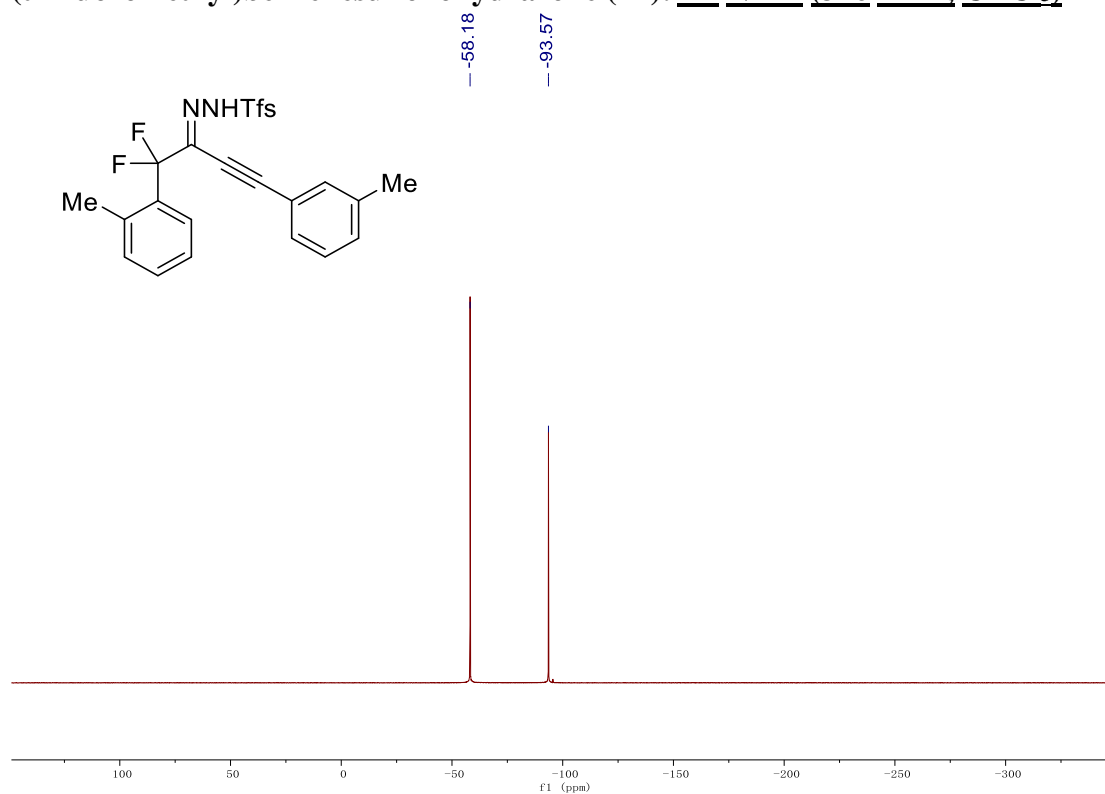

***N'*-(1,1-difluoro-1-(*o*-tolyl)-4-(*p*-tolyl)but-3-yn-2-ylidene)-2-(trifluoromethyl)benzenesulfonylhydrazide (1l): <sup>1</sup>H NMR (400 MHz, CDCl<sub>3</sub>)**

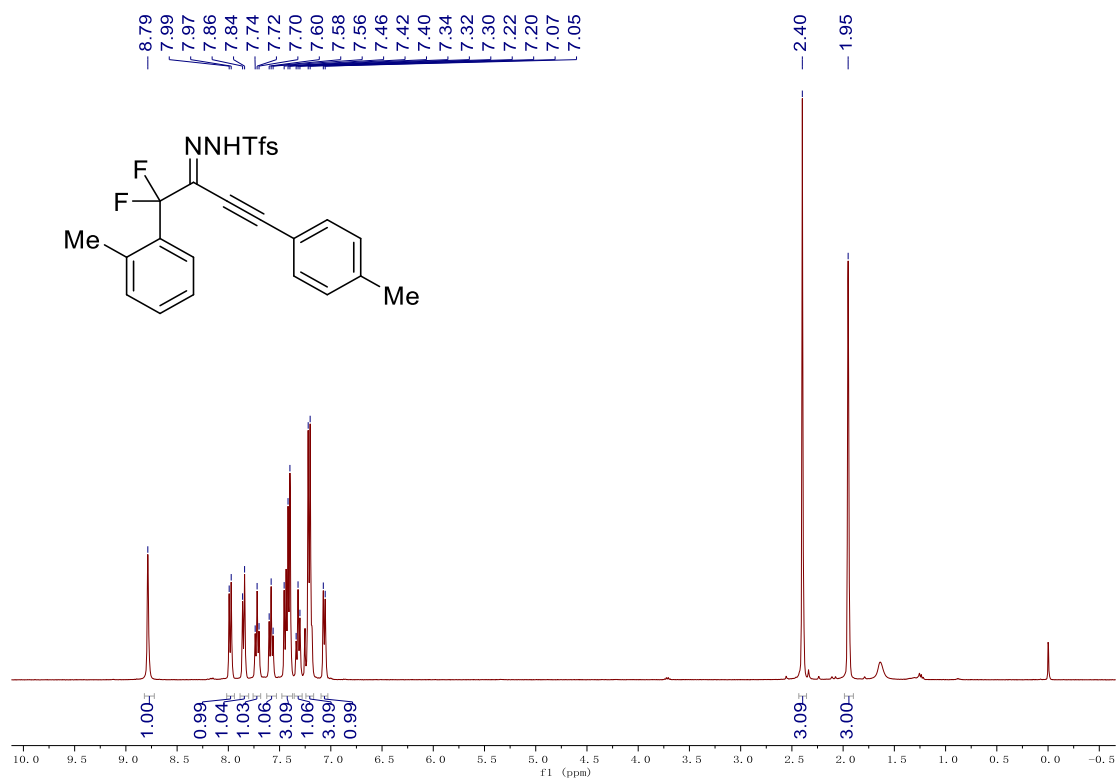

***N'*-(1,1-difluoro-1-(*o*-tolyl)-4-(*p*-tolyl)but-3-yn-2-ylidene)-2-(trifluoromethyl)benzenesulfonylhydrazone (1): <sup>13</sup>C NMR (101 MHz, CDCl<sub>3</sub>)**

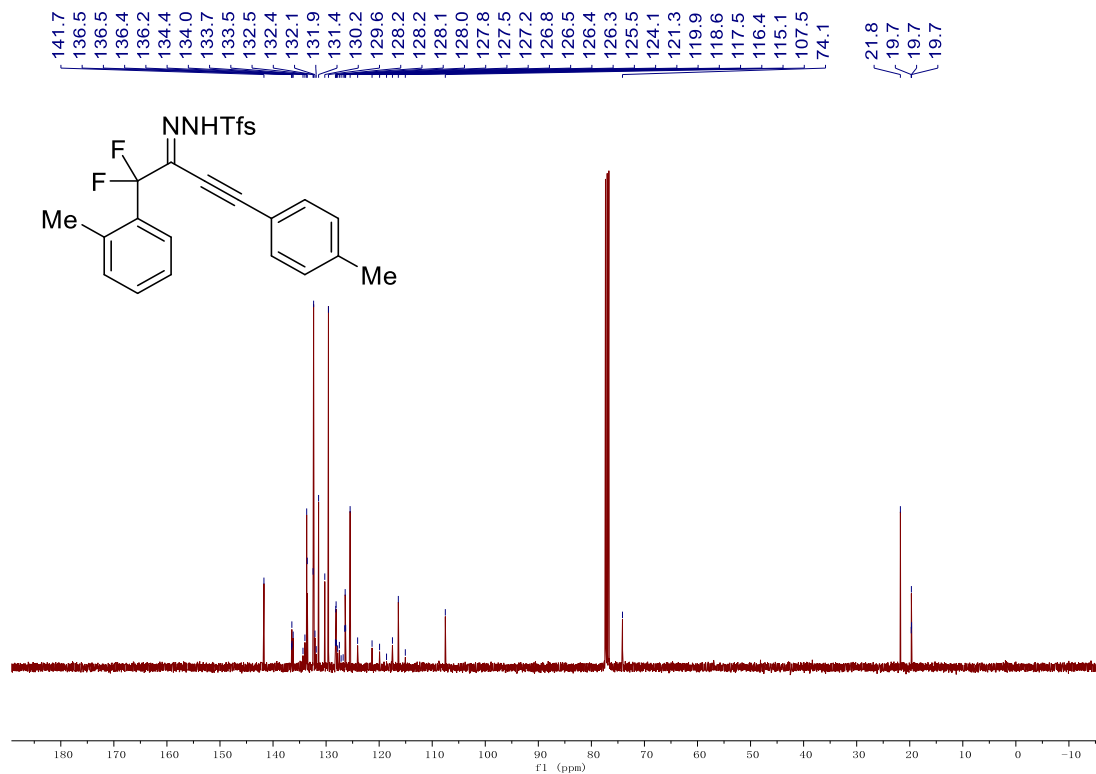

***N'*-(1,1-difluoro-1-(*o*-tolyl)-4-(*p*-tolyl)but-3-yn-2-ylidene)-2-(trifluoromethyl)benzenesulfonylhydrazone (1): <sup>19</sup>F NMR (376 MHz, CDCl<sub>3</sub>)**

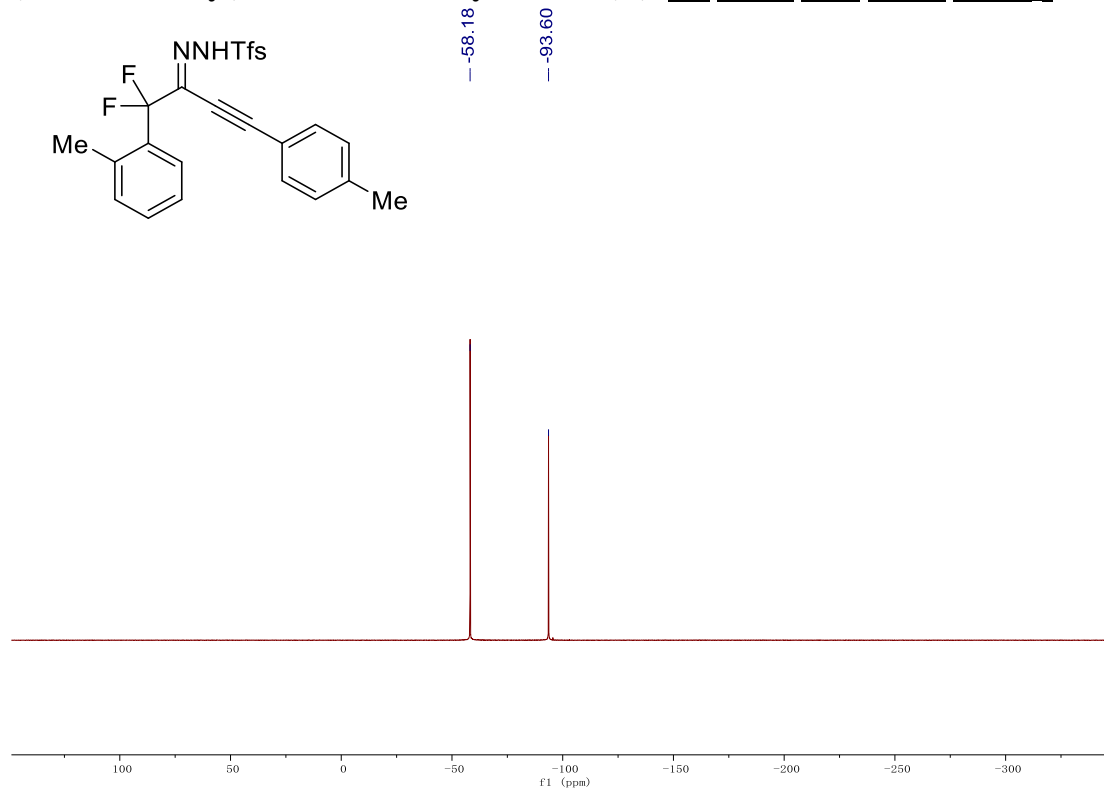

***N'*-(4-(2-chlorophenyl)-1,1-difluoro-1-(*o*-tolyl)but-3-yn-2-ylidene)-2-(trifluoromethyl)benzenesulfonohydrazone (1m): <sup>1</sup>H NMR (400 MHz, CDCl<sub>3</sub>)**

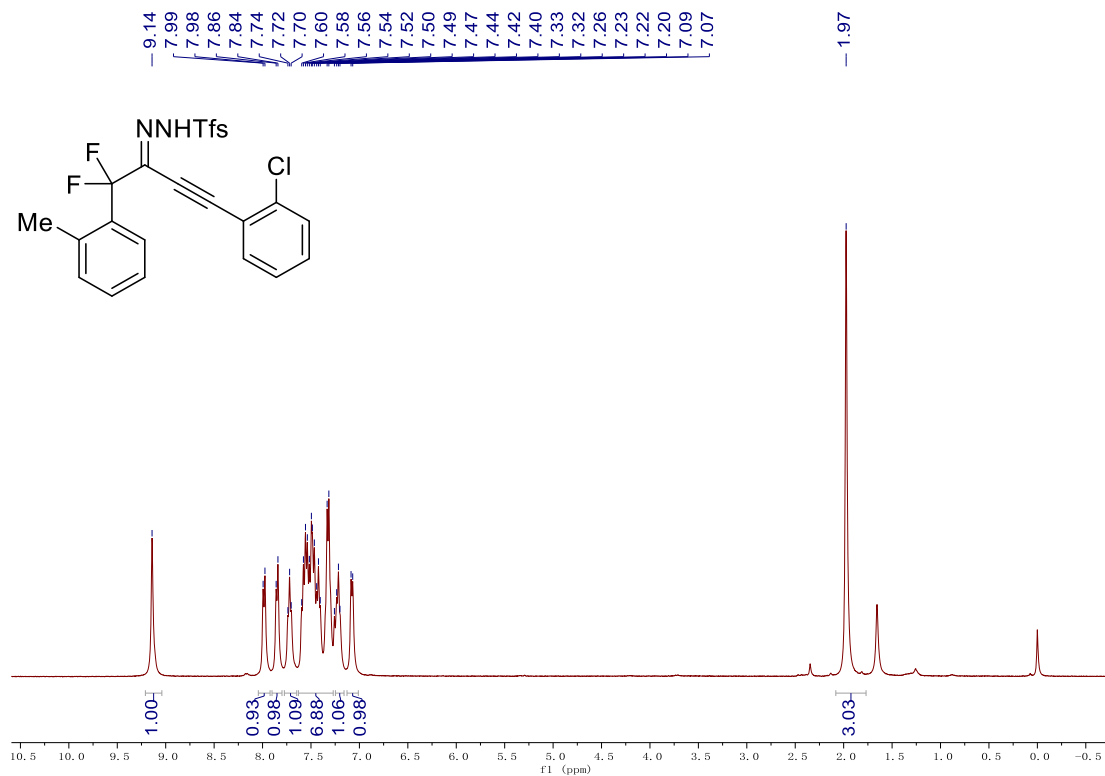

***N'*-(4-(2-chlorophenyl)-1,1-difluoro-1-(*o*-tolyl)but-3-yn-2-ylidene)-2-(trifluoromethyl)benzenesulfonohydrazone (1m): <sup>13</sup>C NMR (101 MHz, CDCl<sub>3</sub>)**

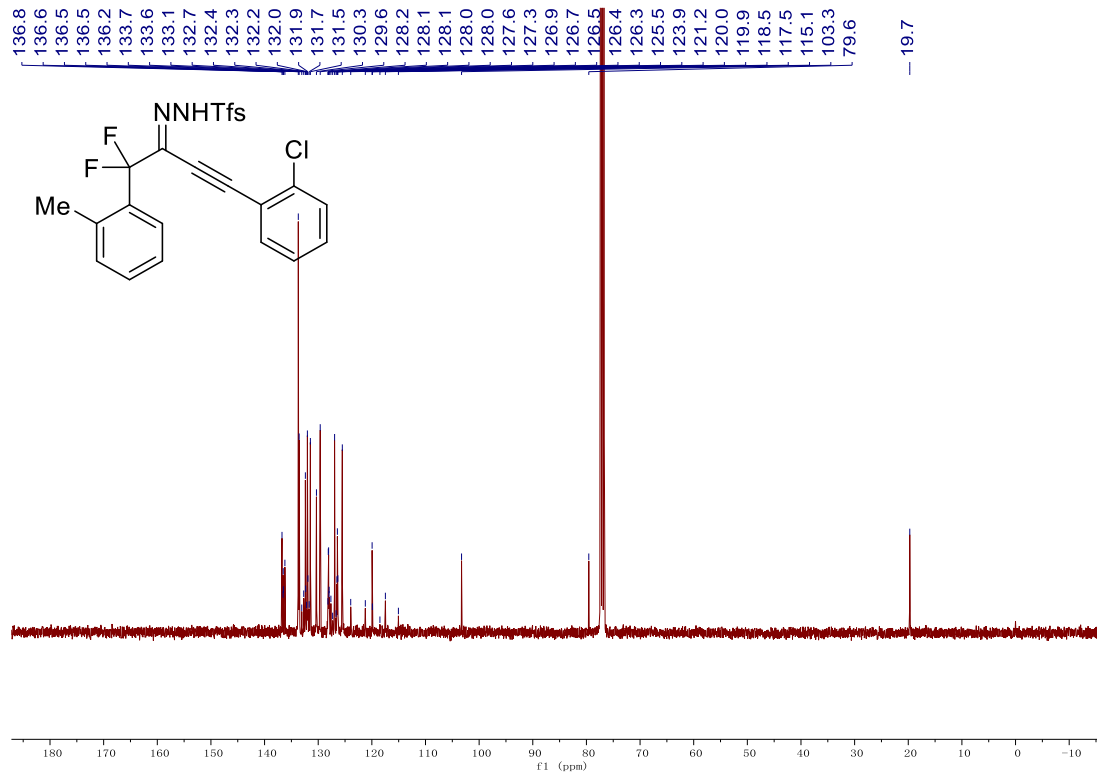

***N'*-(4-(2-chlorophenyl)-1,1-difluoro-1-(*o*-tolyl)but-3-yn-2-ylidene)-2-(trifluoromethyl)benzenesulfonylhydrazide (1m):  $^{19}\text{F}$  NMR (376 MHz,  $\text{CDCl}_3$ )**

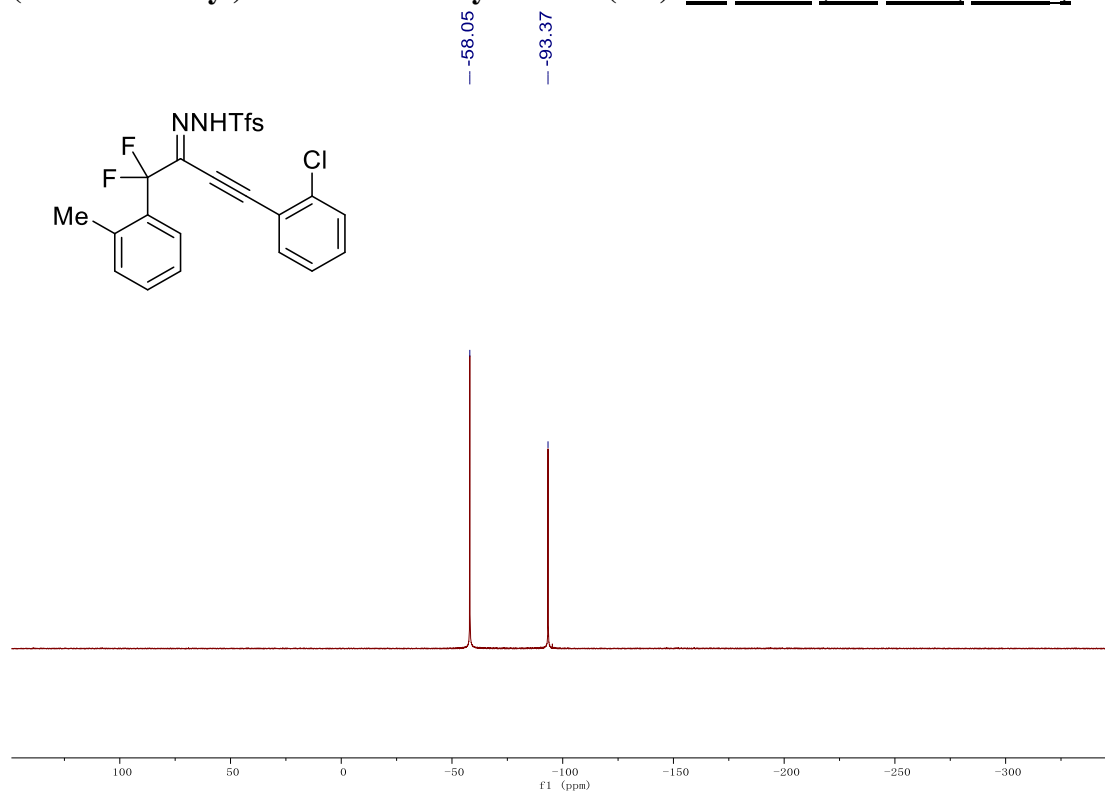

***N'*-(4-(3-chlorophenyl)-1,1-difluoro-1-(*o*-tolyl)but-3-yn-2-ylidene)-2-(trifluoromethyl)benzenesulfonylhydrazide (1n):  $^1\text{H}$  NMR (400 MHz,  $\text{CDCl}_3$ )**

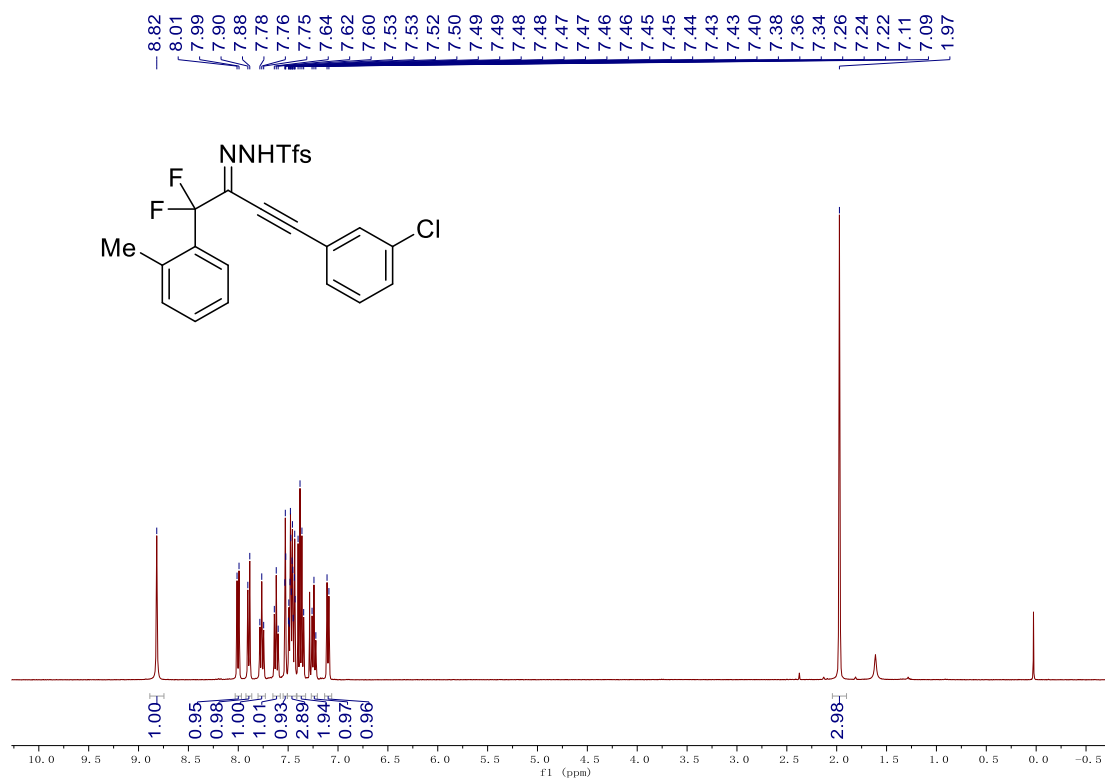



***N'*-(4-(3-chlorophenyl)-1,1-difluoro-1-(*o*-tolyl)but-3-yn-2-ylidene)-2-(trifluoromethyl)benzenesulfonylhydrazone (1n): <sup>13</sup>C NMR (101 MHz, CDCl<sub>3</sub>)**

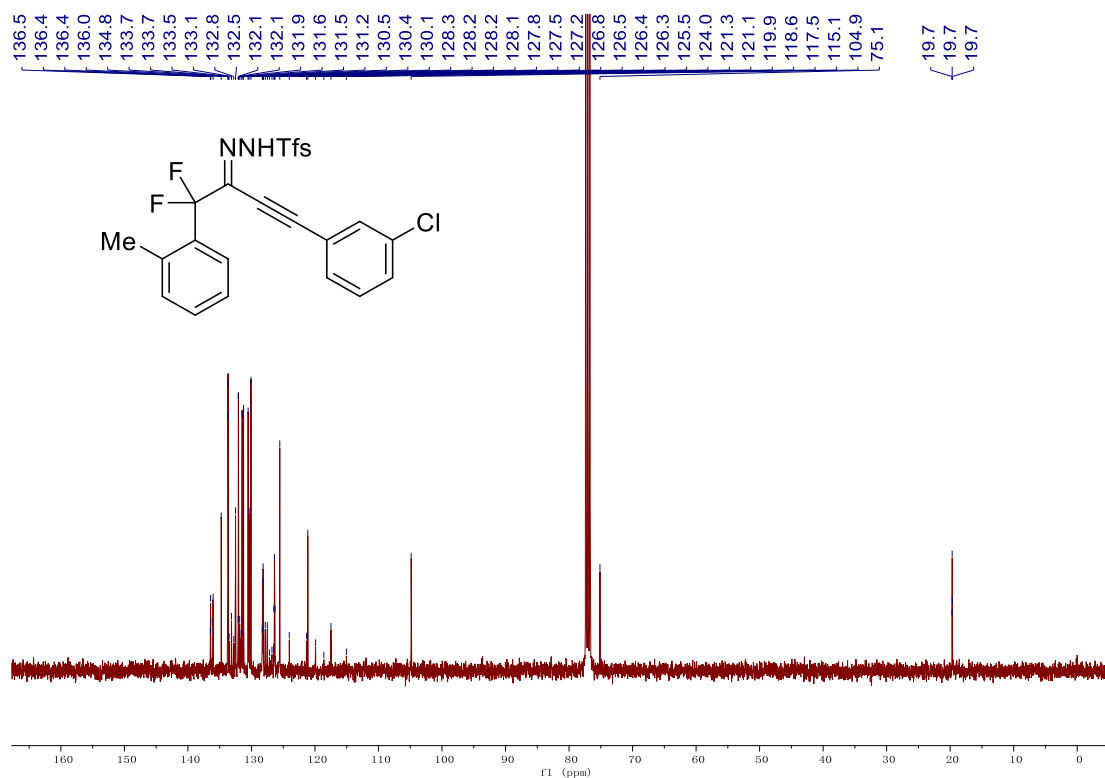

***N'*-(4-(3-chlorophenyl)-1,1-difluoro-1-(*o*-tolyl)but-3-yn-2-ylidene)-2-(trifluoromethyl)benzenesulfonylhydrazone (1n): <sup>19</sup>F NMR (376 MHz, CDCl<sub>3</sub>)**

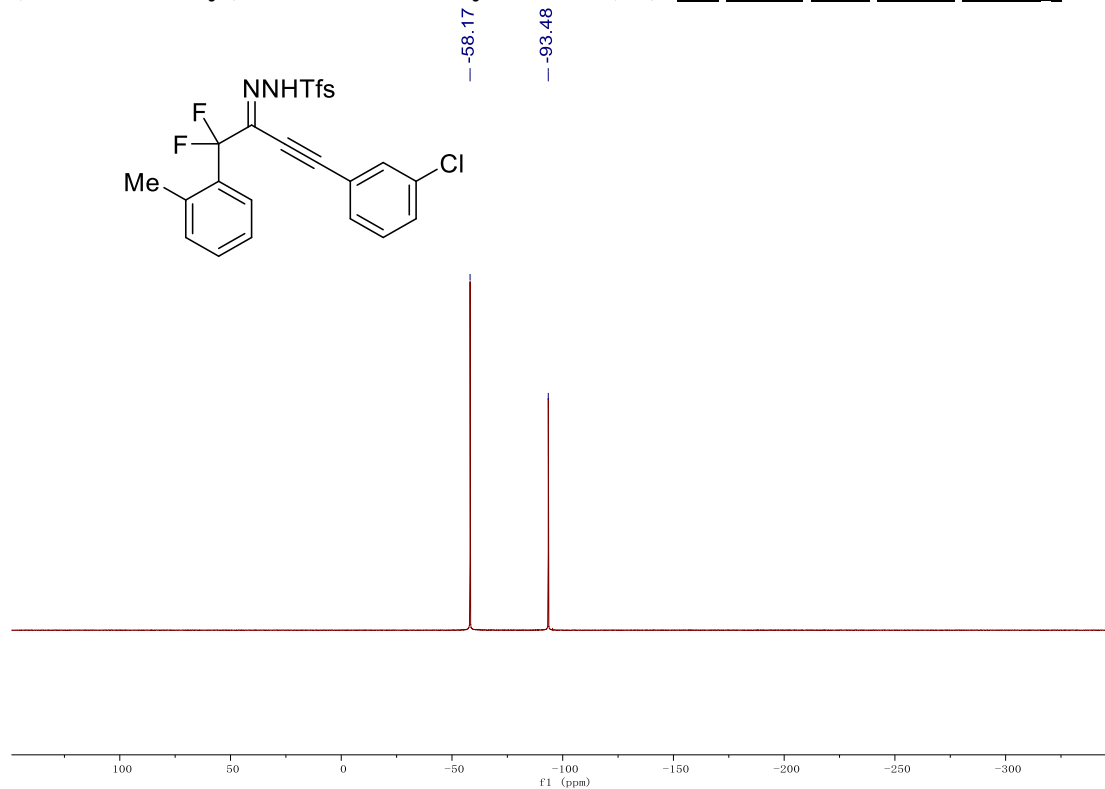

***N'*-(4-(4-chlorophenyl)-1,1-difluoro-1-(*o*-tolyl)but-3-yn-2-ylidene)-2-(trifluoromethyl)benzenesulfonohydrazone (1o): <sup>1</sup>H NMR (400 MHz, CDCl<sub>3</sub>)**

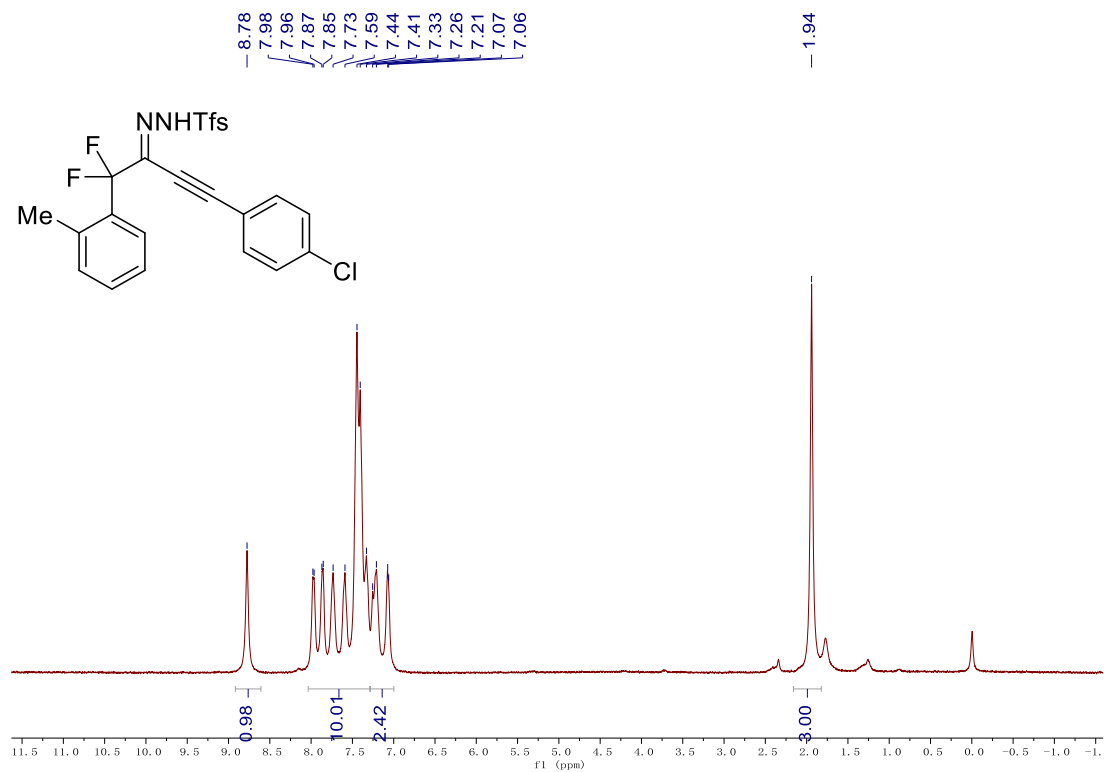

***N'*-(4-(4-chlorophenyl)-1,1-difluoro-1-(*o*-tolyl)but-3-yn-2-ylidene)-2-(trifluoromethyl)benzenesulfonohydrazone (1o): <sup>13</sup>C NMR (101 MHz, CDCl<sub>3</sub>)**

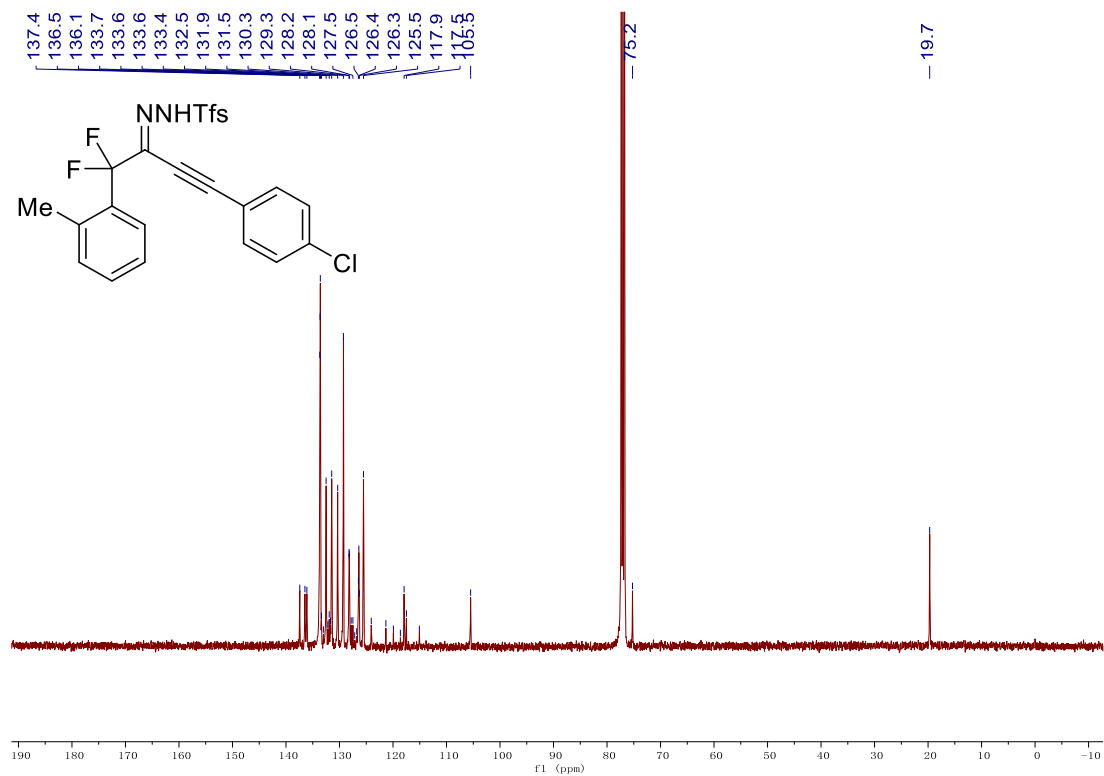

***N'*-(4-(4-chlorophenyl)-1,1-difluoro-1-(*o*-tolyl)but-3-yn-2-ylidene)-2-(trifluoromethyl)benzenesulfonylhydrazide (1o): <sup>19</sup>F NMR (376 MHz, CDCl<sub>3</sub>)**

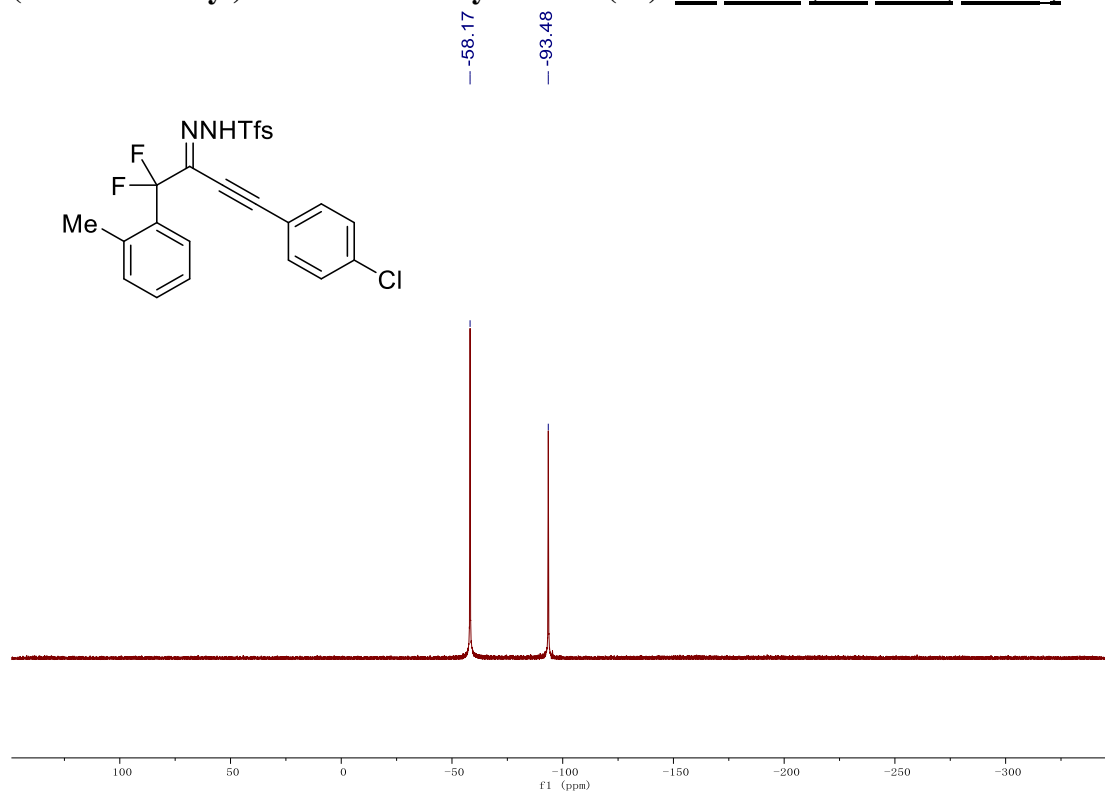

***N'*-(4-(3-chlorophenyl)-1,1-difluoro-1-(*o*-tolyl)but-3-yn-2-ylidene)-2-(trifluoromethyl)benzenesulfonylhydrazide (1p): <sup>1</sup>H NMR (400 MHz, CDCl<sub>3</sub>)**

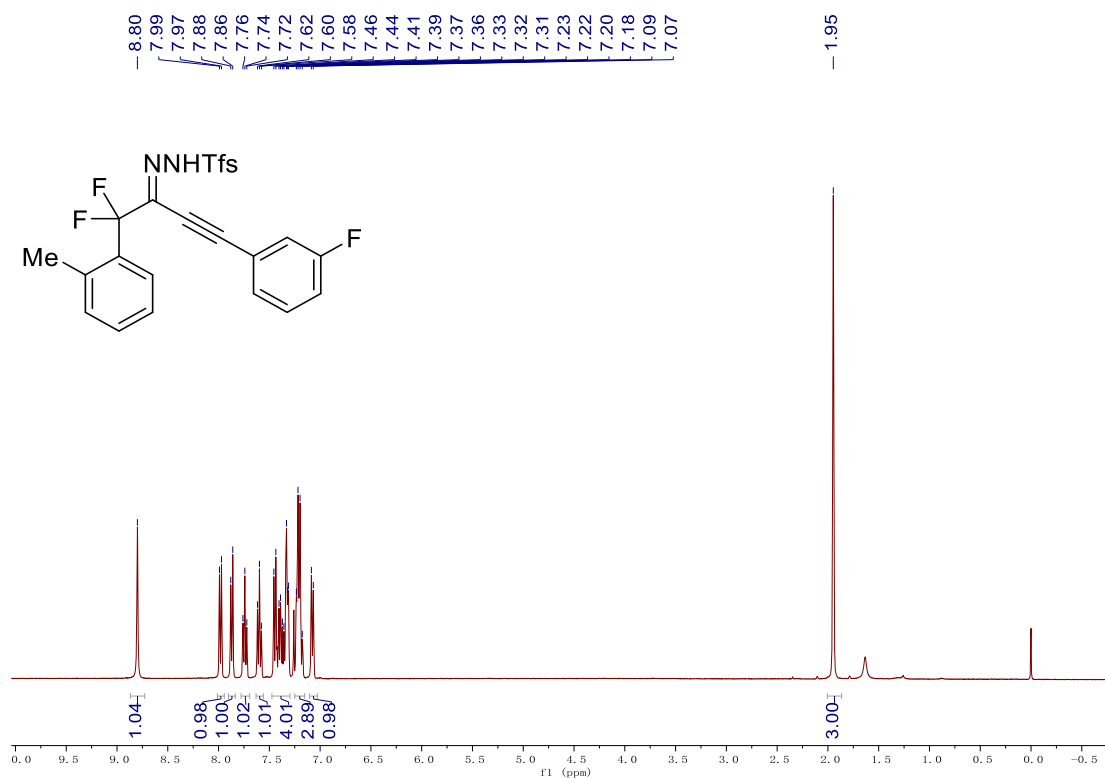

***N'*-1,1-difluoro-4-(3-chlorophenyl)-1-(*o*-tolyl)but-3-yn-2-ylidene)-2-(trifluoromethyl)benzenesulfonylhydrazone (1p):  $^{13}\text{C}$  NMR (101 MHz,  $\text{CDCl}_3$ )**

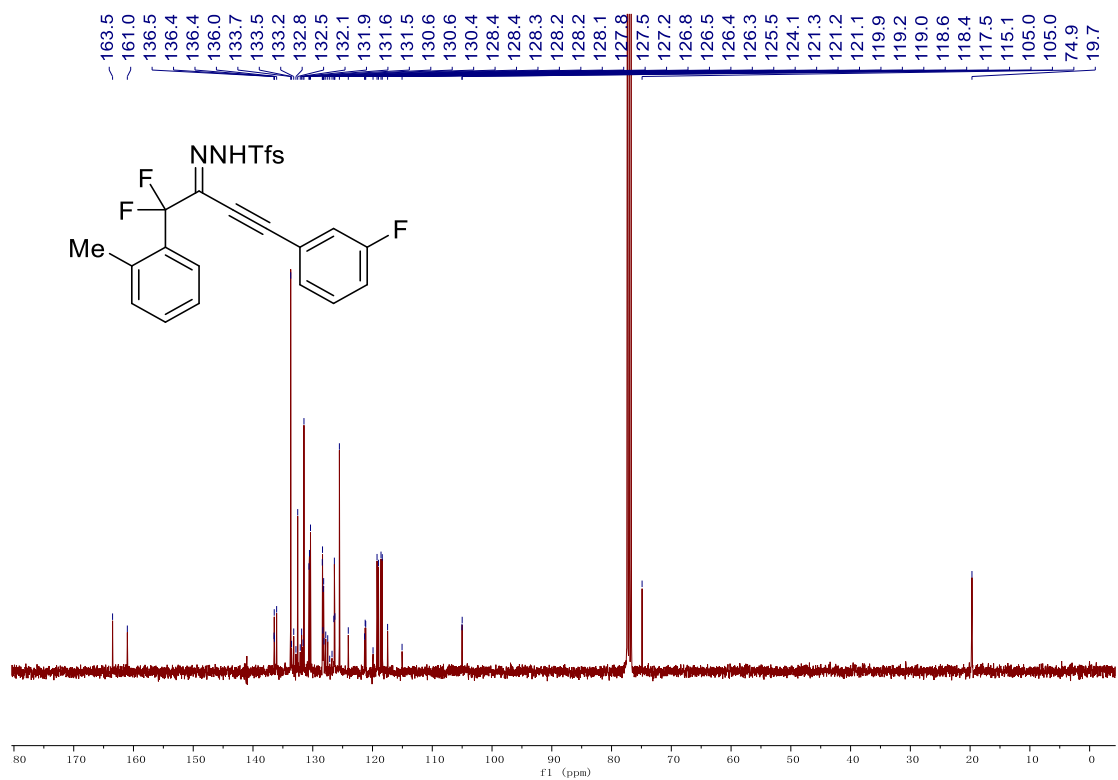

***N'*-1,1-difluoro-(4-(3-chlorophenyl)-1-(*o*-tolyl)but-3-yn-2-ylidene)-2-(trifluoromethyl)benzenesulfonylhydrazone (1p):  $^{19}\text{F}$  NMR (376 MHz,  $\text{CDCl}_3$ )**

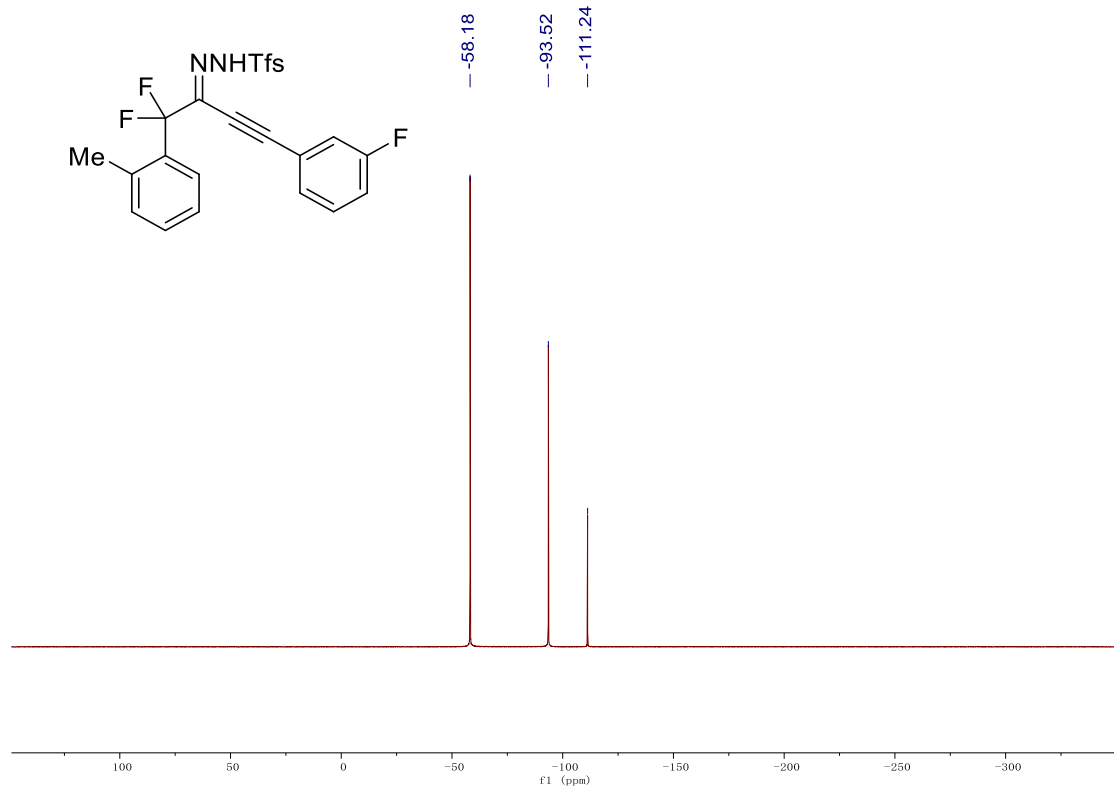

***N'*-(1,1-difluoro-1-(*o*-tolyl)-4-(4-(trifluoromethyl)phenyl)but-3-yn-2-ylidene)-2-(trifluoromethyl)benzenesulfonylhydrazide (1q): <sup>1</sup>H NMR (400 MHz, THF-d<sub>8</sub>)**

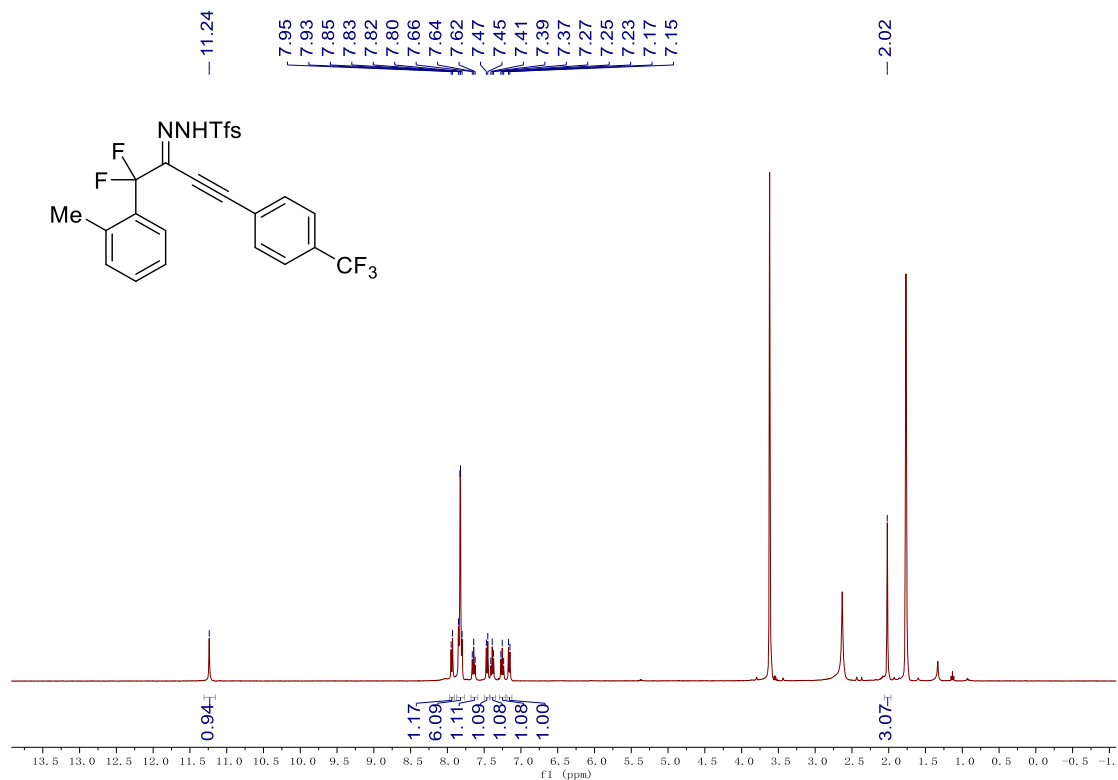

***N'*-(1,1-difluoro-1-(*o*-tolyl)-4-(4-(trifluoromethyl)phenyl)but-3-yn-2-ylidene)-2-(trifluoromethyl)benzenesulfonylhydrazide (1q): <sup>13</sup>C NMR (151 MHz, THF-d<sub>8</sub>)**

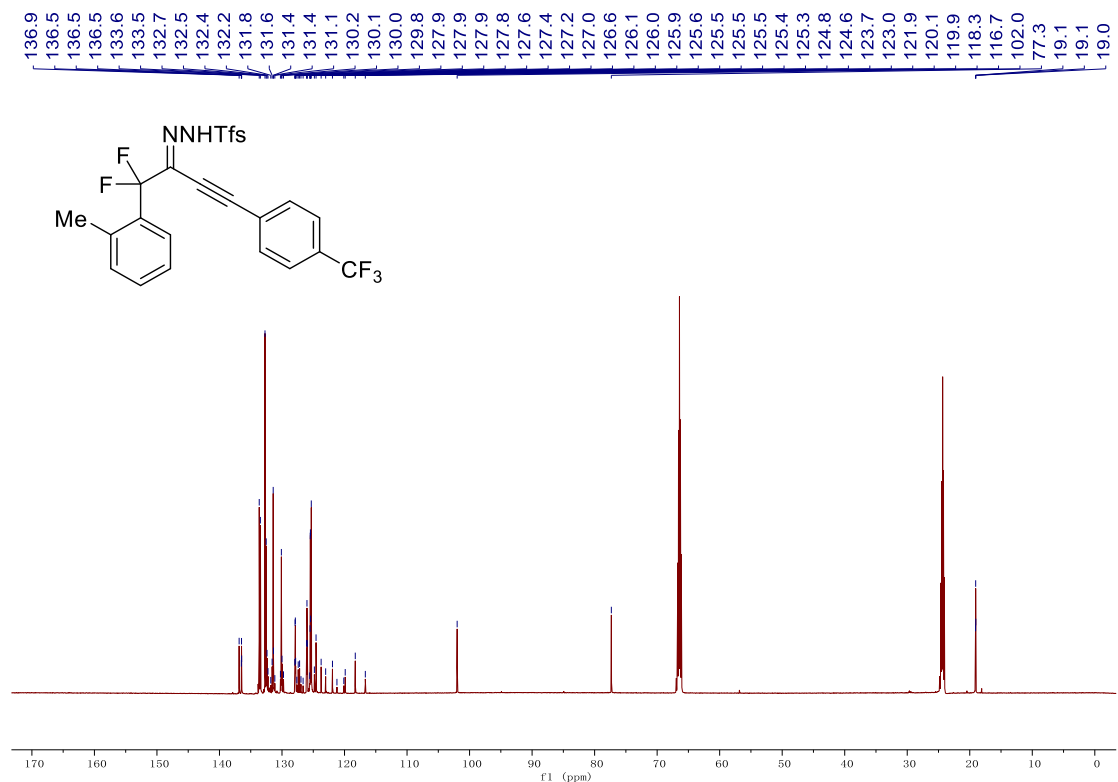

***N'*-(1,1-difluoro-1-(*o*-tolyl)-4-(4-(trifluoromethyl)phenyl)but-3-yn-2-ylidene)-2-(trifluoromethyl)benzenesulfonylhydrazide (1q):  $^{19}\text{F}$  NMR (376 MHz, THF- $d_8$ )**

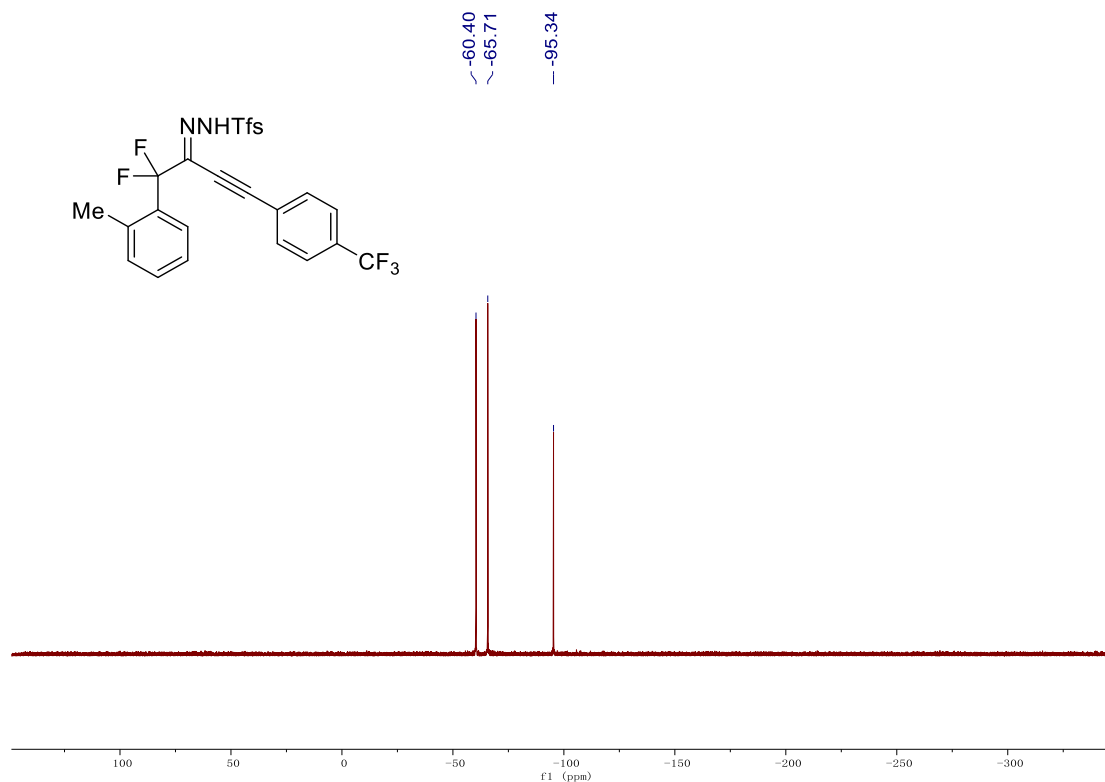

***N'*-(1,1-difluoro-4-(naphthalen-1-yl)-1-(*o*-tolyl)but-3-yn-2-ylidene)-2-(trifluoromethyl)benzenesulfonylhydrazide (1r):  $^1\text{H}$  NMR (400 MHz, THF- $d_6$ )**

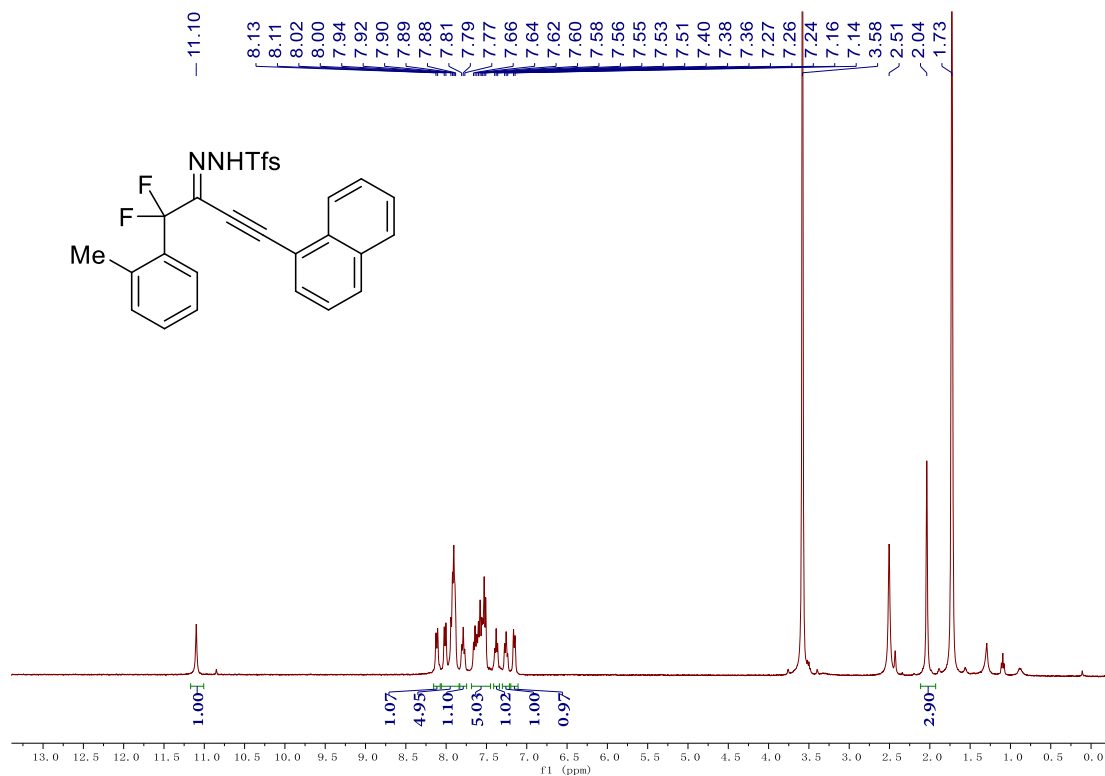

***N'*-(1,1-difluoro-4-(naphthalen-1-yl)-1-(*o*-tolyl)but-3-yn-2-ylidene)-2-(trifluoromethyl)benzenesulfonylhydrazide (1r): <sup>13</sup>C NMR (101 MHz, THF-*d*<sub>6</sub>)**

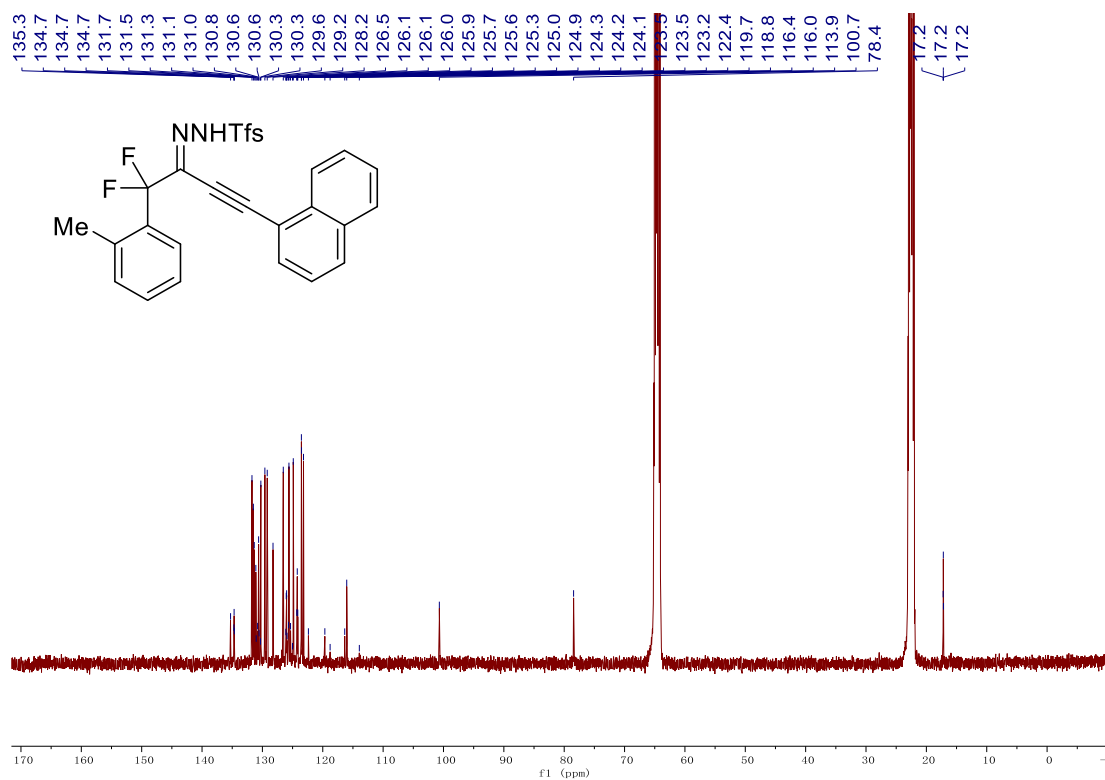

***N'*-(1,1-difluoro-4-(naphthalen-1-yl)-1-(*o*-tolyl)but-3-yn-2-ylidene)-2-(trifluoromethyl)benzenesulfonylhydrazide (1r): <sup>19</sup>F NMR (376 MHz, THF-*d*<sub>6</sub>)**

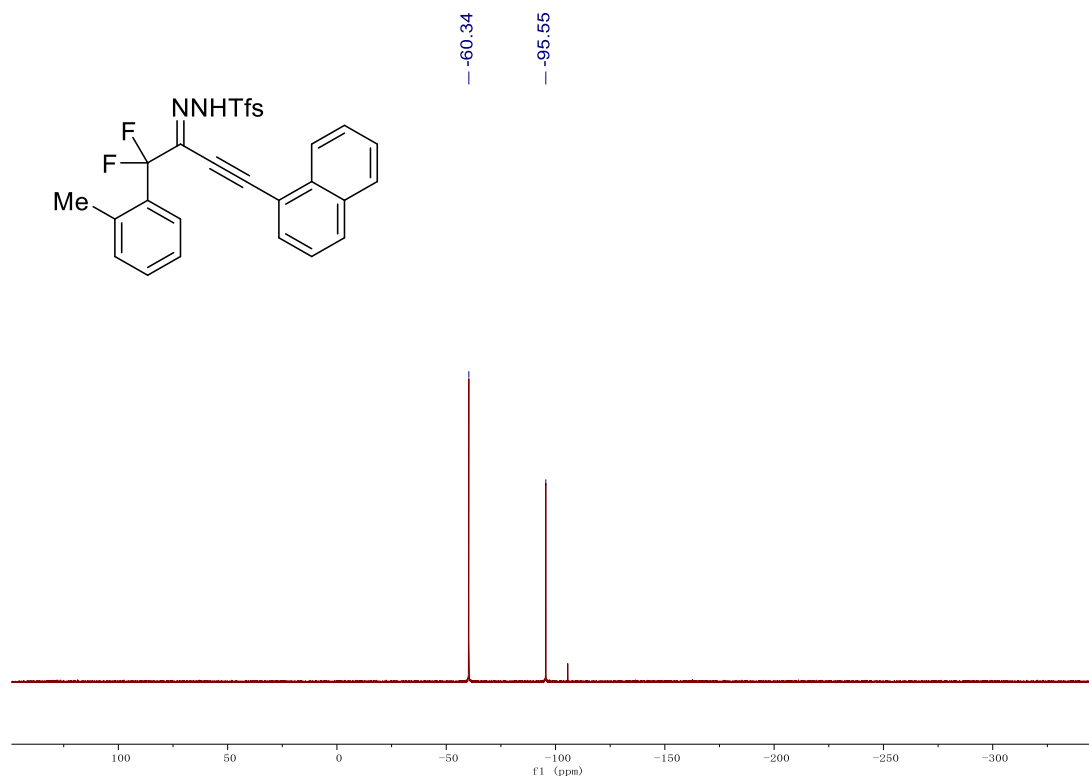

***N'*-(1,1-difluoro-4-(thiophen-2-yl)-1-(*o*-tolyl)but-3-yn-2-ylidene)-2-(trifluoromethyl)benzenesulfonylhydrazone (1s): <sup>1</sup>H NMR (400 MHz, CDCl<sub>3</sub>)**

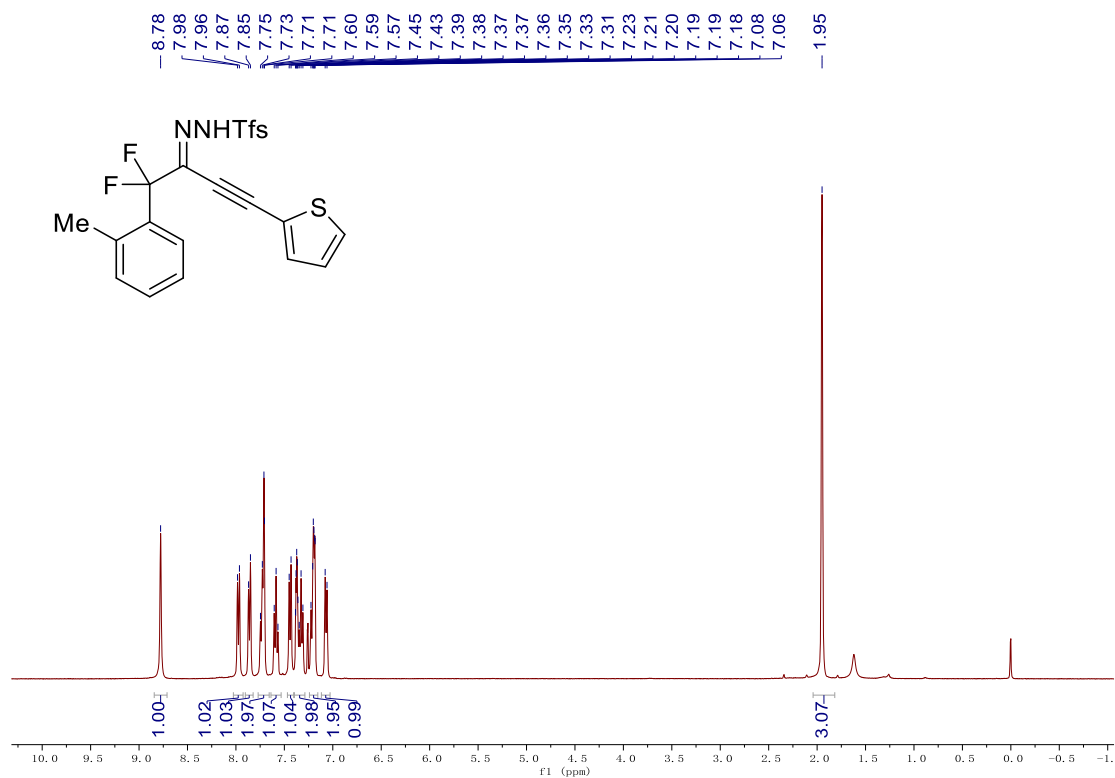

***N'*-(1,1-difluoro-4-(thiophen-2-yl)-1-(*o*-tolyl)but-3-yn-2-ylidene)-2-(trifluoromethyl)benzenesulfonylhydrazone (1s): <sup>13</sup>C NMR (101 MHz, CDCl<sub>3</sub>)**

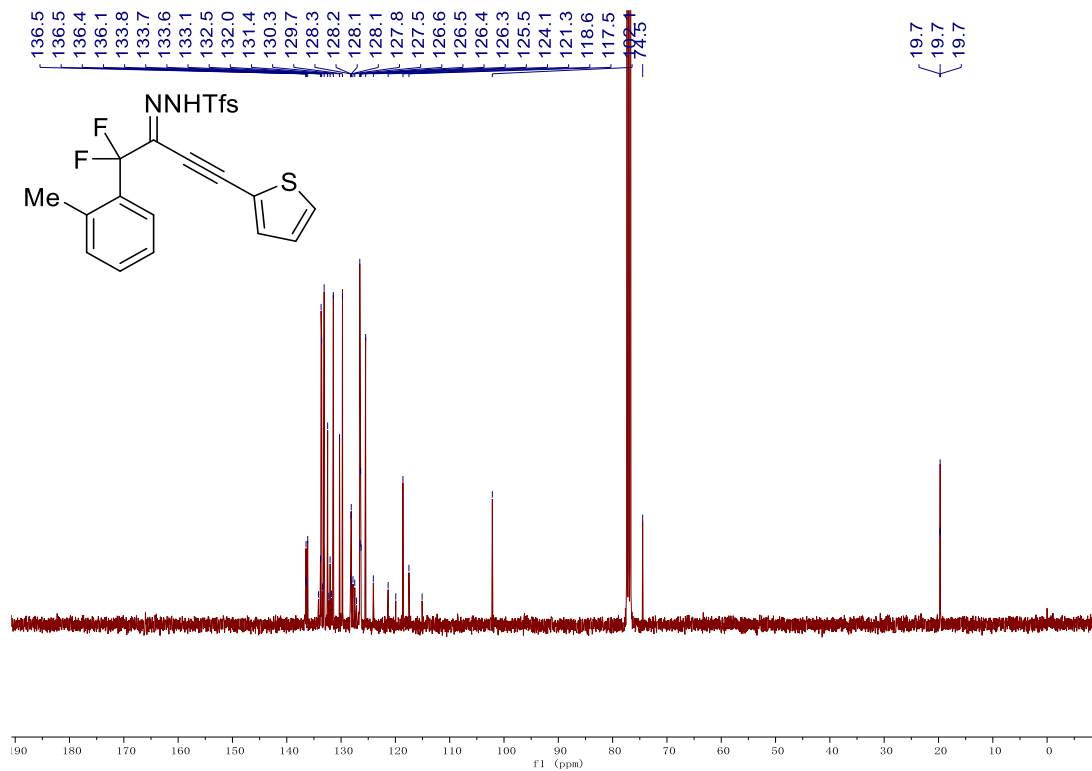



***N'*-(1,1-difluoro-4-(thiophen-2-yl)-1-(*o*-tolyl)but-3-yn-2-ylidene)-2-(trifluoromethyl)benzenesulfonylhydrazide (1s):  $^{19}\text{F}$  NMR (376 MHz,  $\text{CDCl}_3$ )**

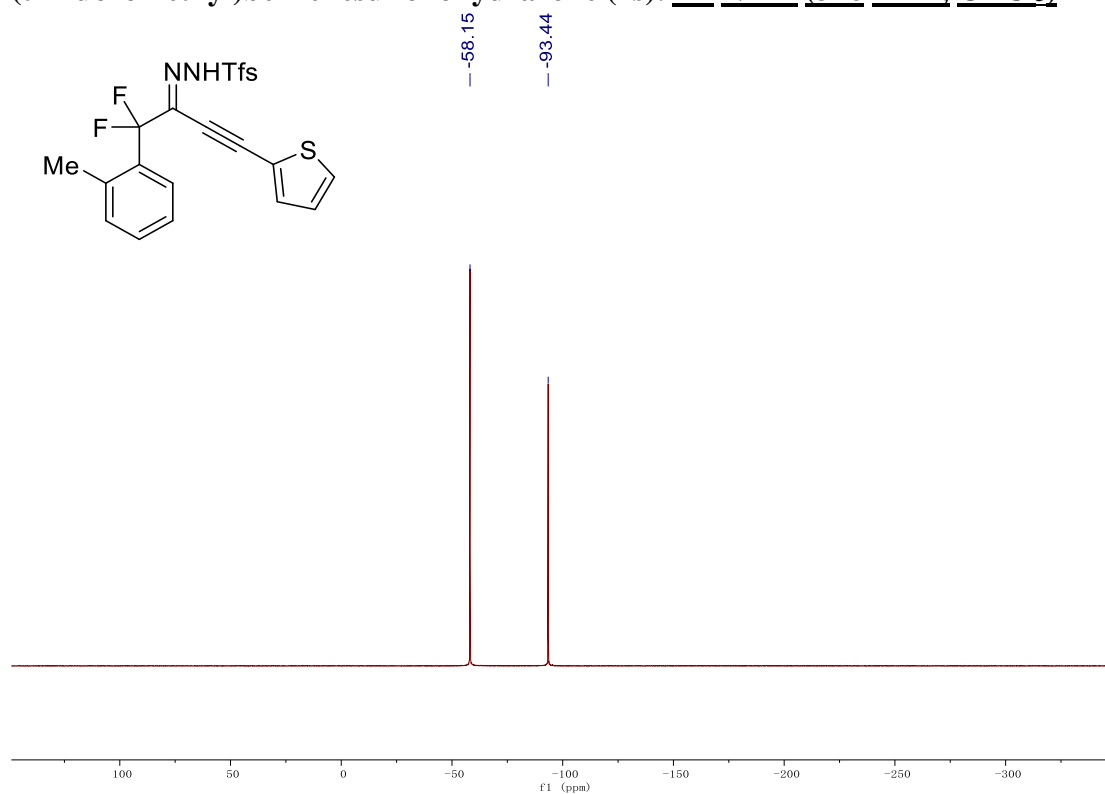

***N'*-(4,4-difluoro-1-(naphthalen-1-yl)pent-1-yn-3-ylidene)-2-(trifluoromethyl)benzenesulfonylhydrazide (1t):  $^1\text{H}$  NMR (400 MHz,  $\text{CDCl}_3$ )**

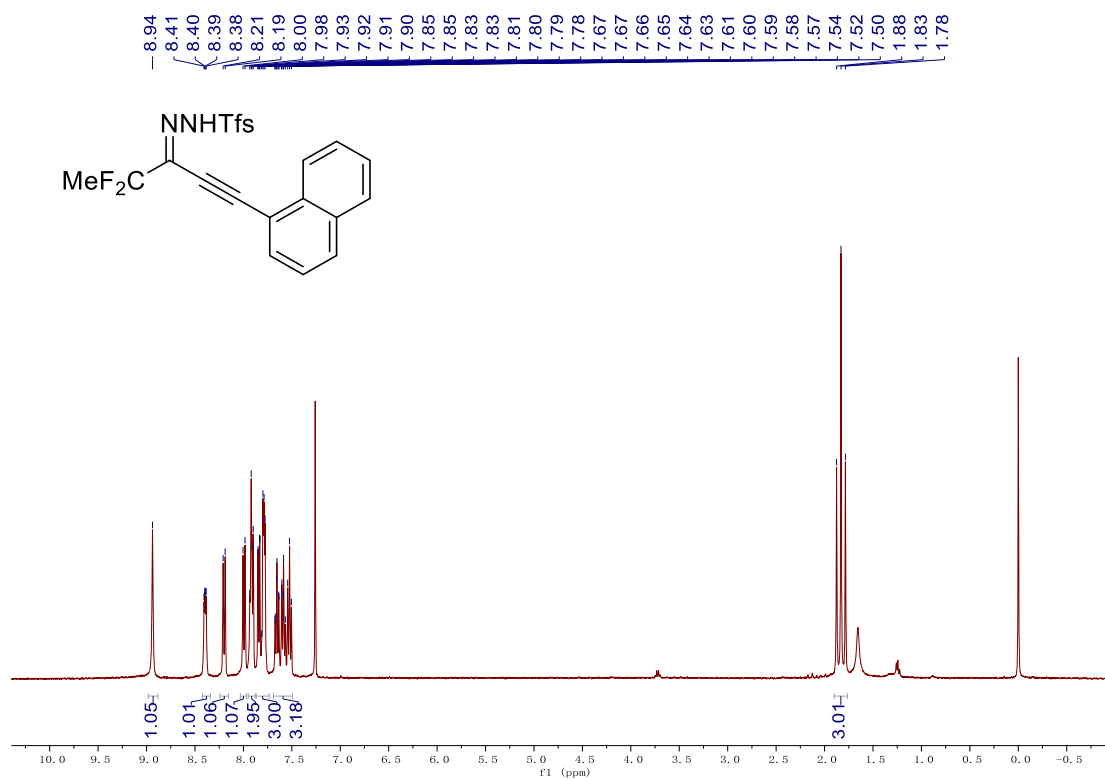

***N'*-(4,4-difluoro-1-(naphthalen-1-yl)pent-1-yn-3-ylidene)-2-(trifluoromethyl)benzenesulfonylhydrazide (1t): <sup>13</sup>C NMR (101 MHz, CDCl<sub>3</sub>)**

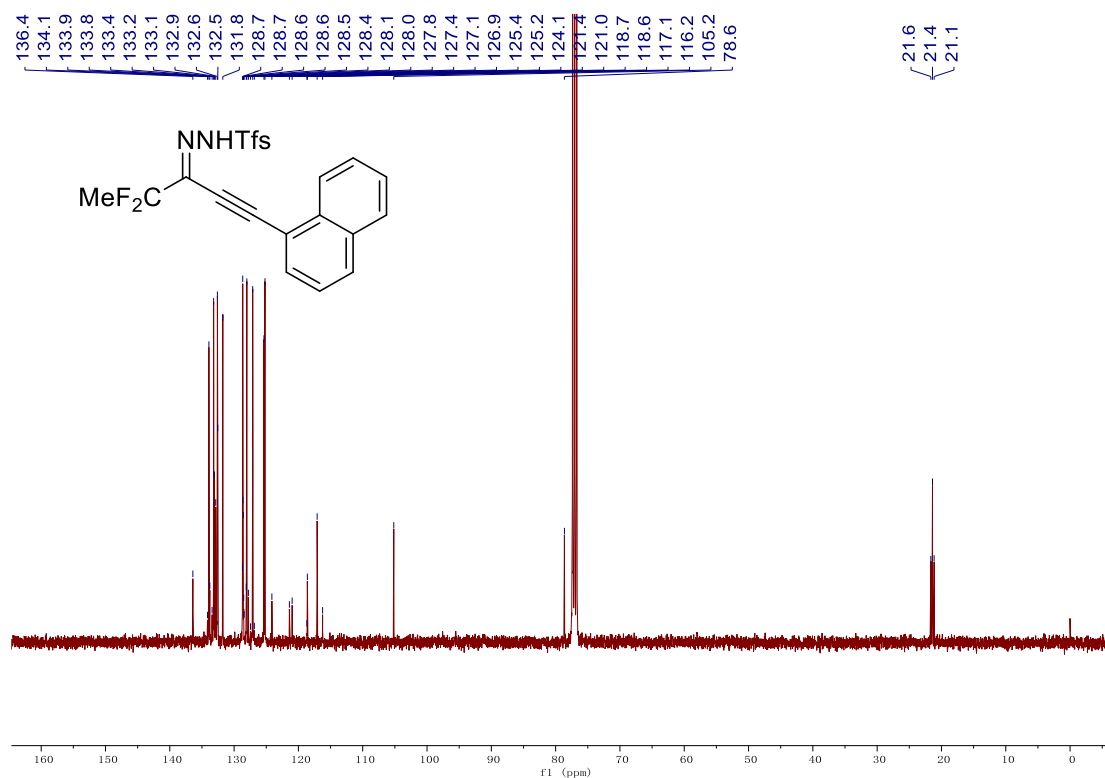

***N'*-(4,4-difluoro-1-(naphthalen-1-yl)pent-1-yn-3-ylidene)-2-(trifluoromethyl)benzenesulfonylhydrazide (1t): <sup>19</sup>F NMR (376 MHz, CDCl<sub>3</sub>)**

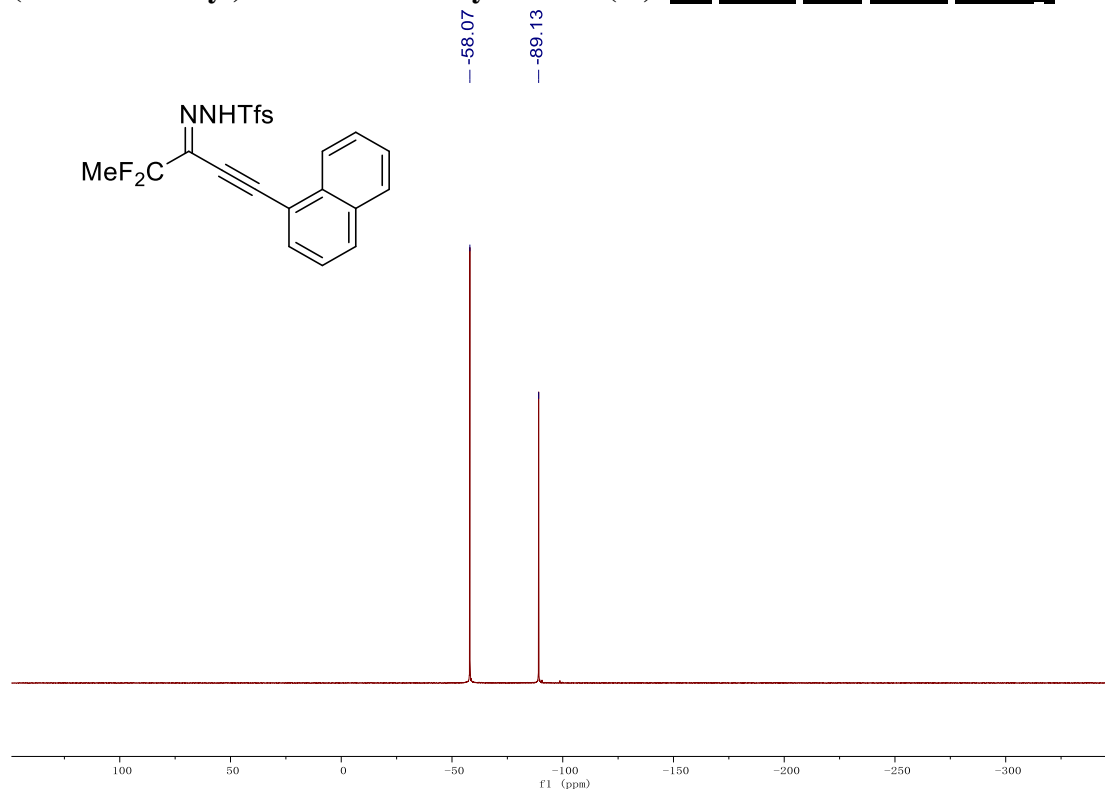

**(-)-Trimethylamine-(1,1-difluoro-1,4-diphenylbut-3-yn-2-yl)borane (3aa):  $^1\text{H}$   
NMR (400 MHz,  $\text{CDCl}_3$ )**

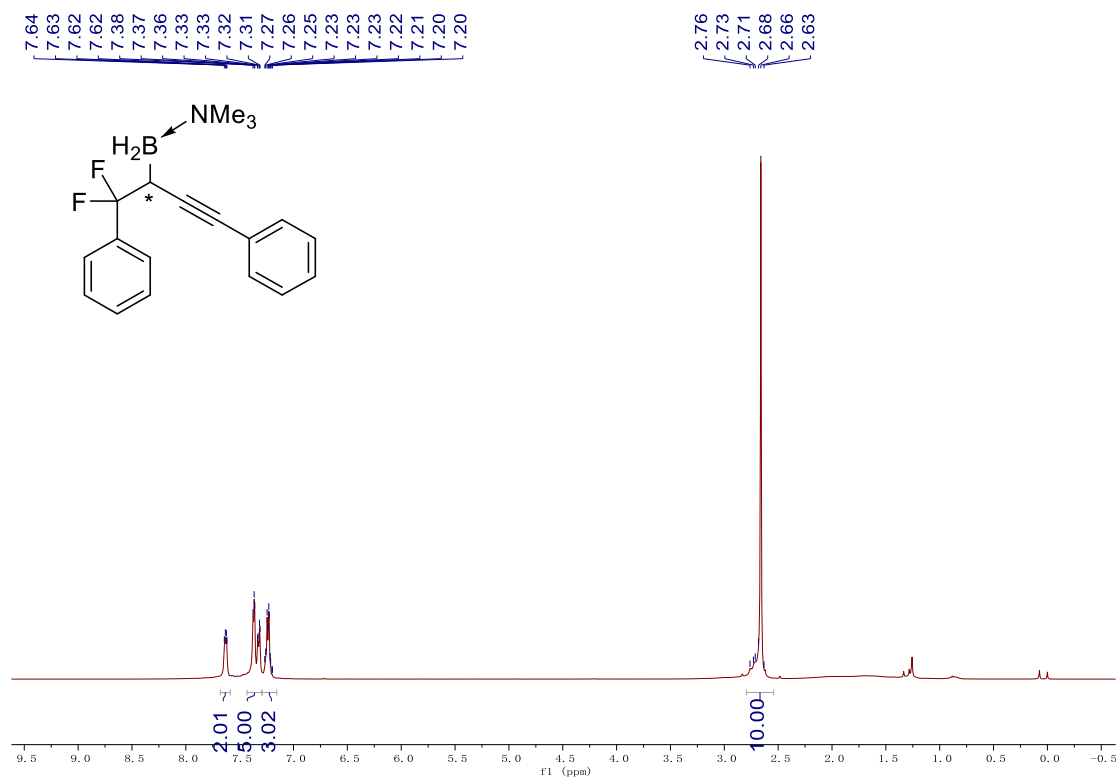

**(-)-Trimethylamine-(1,1-difluoro-1,4-diphenylbut-3-yn-2-yl)borane (3aa):  $^{13}\text{C}$   
NMR (101 MHz,  $\text{CDCl}_3$ )**

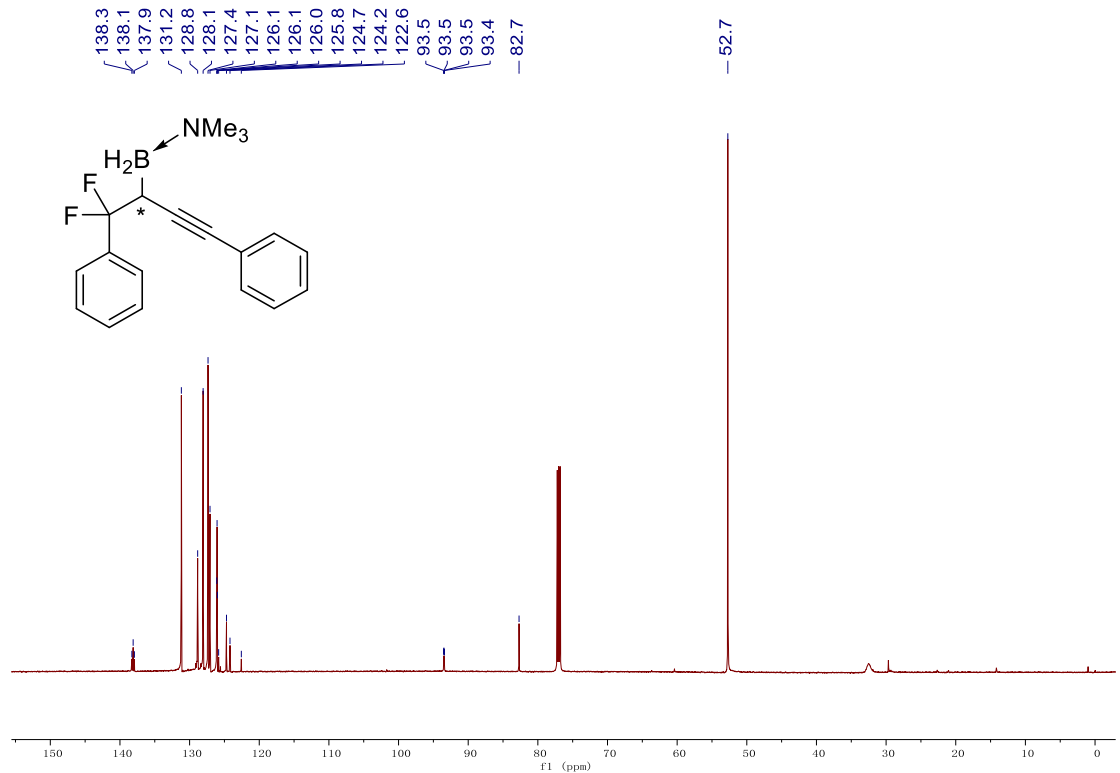

**(-)-Trimethylamine-(1,1-difluoro-1,4-diphenylbut-3-yn-2-yl)borane (3aa):  $^{19}\text{F}$   
NMR (376 MHz,  $\text{CDCl}_3$ )**

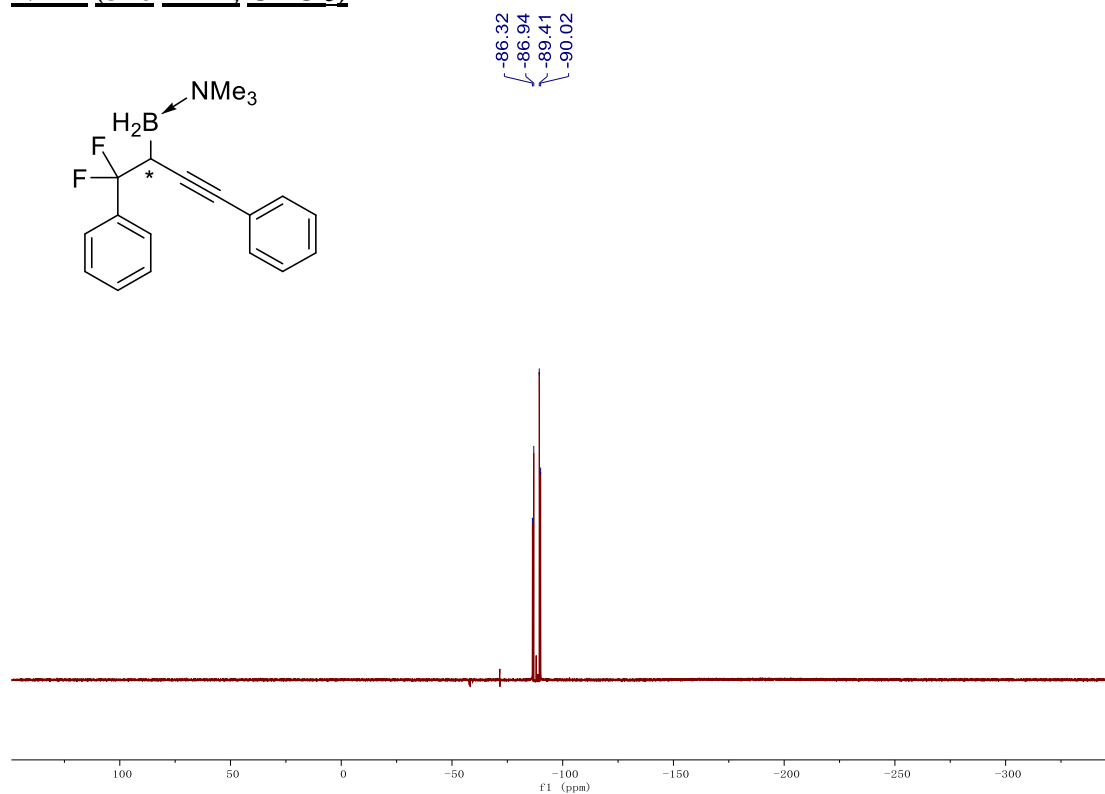

**(-)-1-methylpyrrolidine-(1,1-difluoro-1,4-diphenylbut-3-yn-2-yl)borane (3ab):  $^1\text{H}$   
NMR (400 MHz,  $\text{CDCl}_3$ )**

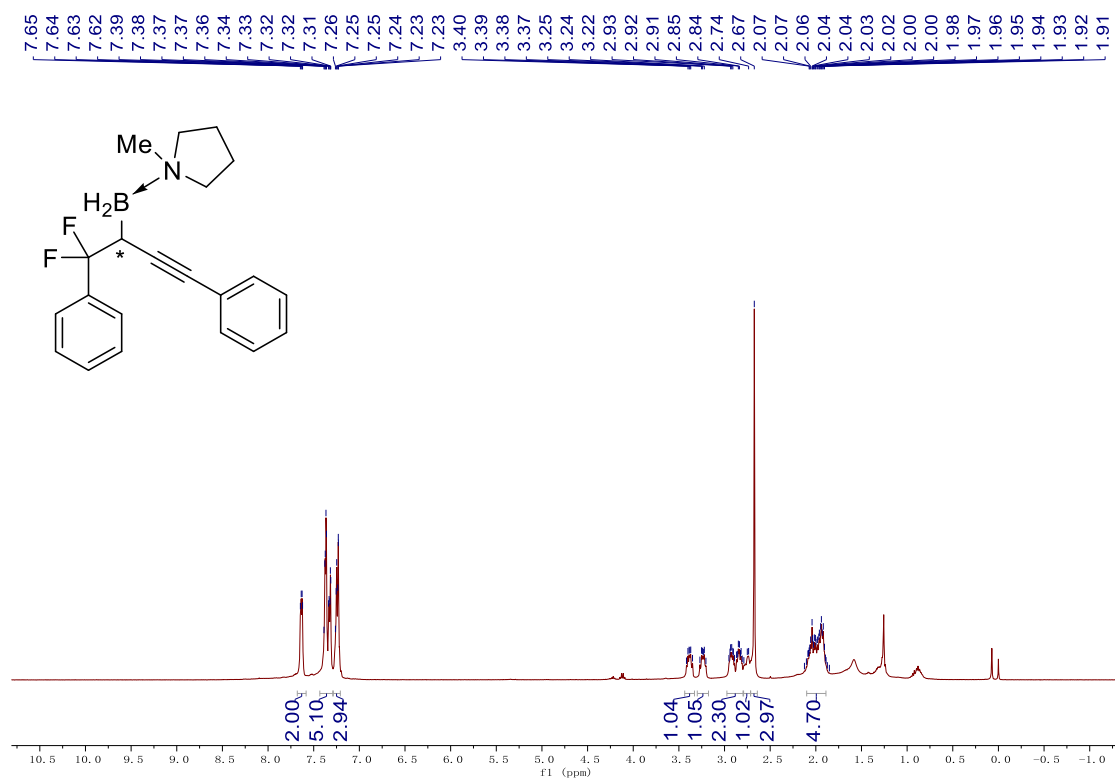

**(-)-1-methylpyrrolidine-(1,1-difluoro-1,4-diphenylbut-3-yn-2-yl)borane (3ab):**

**$^{13}\text{C}$  NMR (101 MHz,  $\text{CDCl}_3$ )**

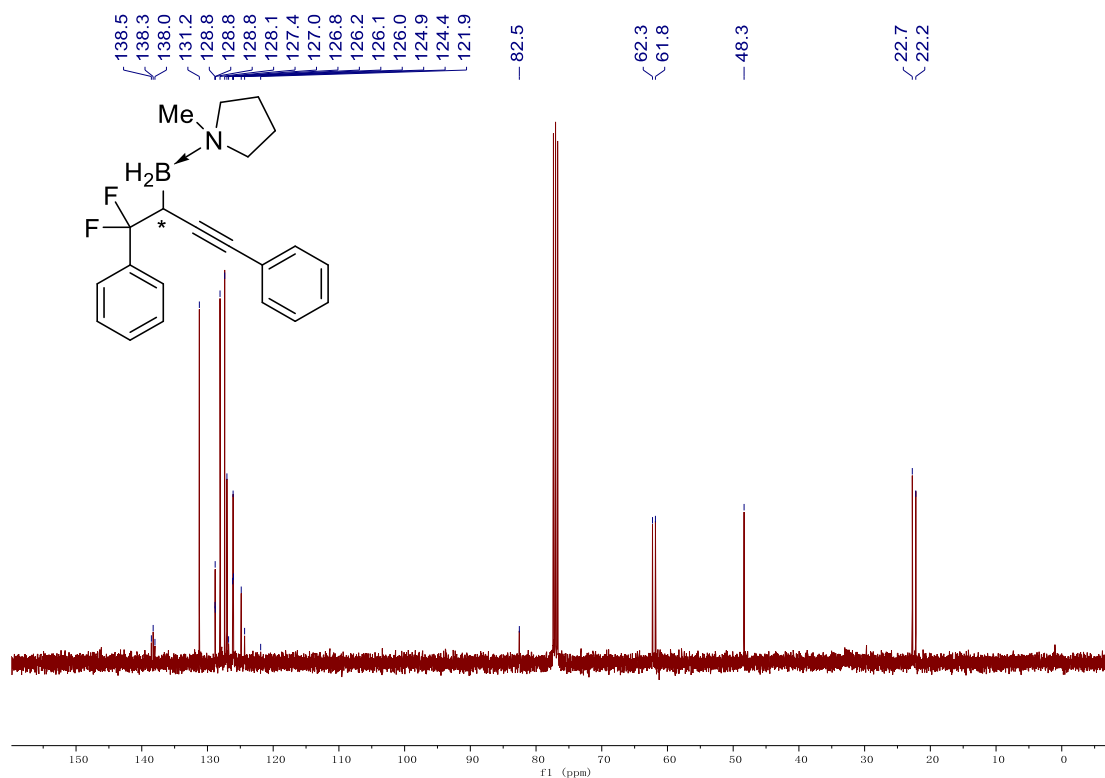

**(-)-1-methylpyrrolidine-(1,1-difluoro-1,4-diphenylbut-3-yn-2-yl)borane (3ab):  $^{19}\text{F}$  NMR (376 MHz,  $\text{CDCl}_3$ )**

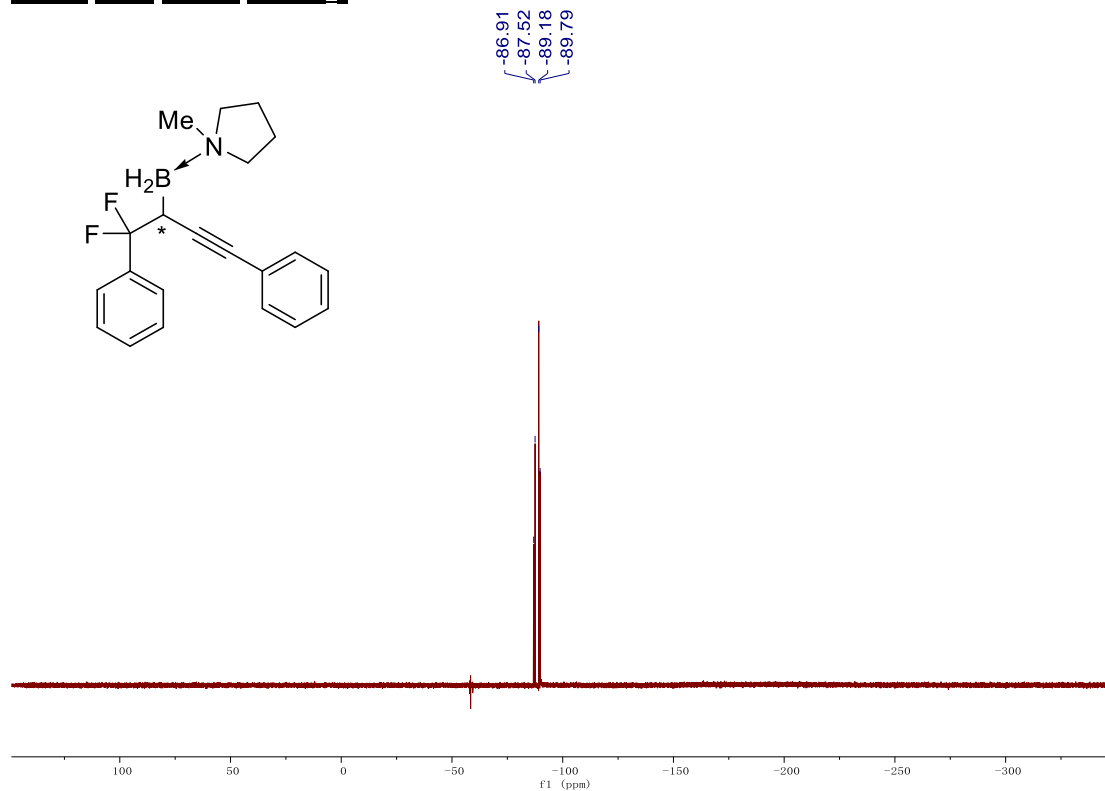

**(+)-3,5-dimethylpyridine-(1,1-difluoro-1,4-diphenylbut-3-yn-2-yl)borane (3ac):**

**<sup>1</sup>H NMR (400 MHz, CDCl<sub>3</sub>)**

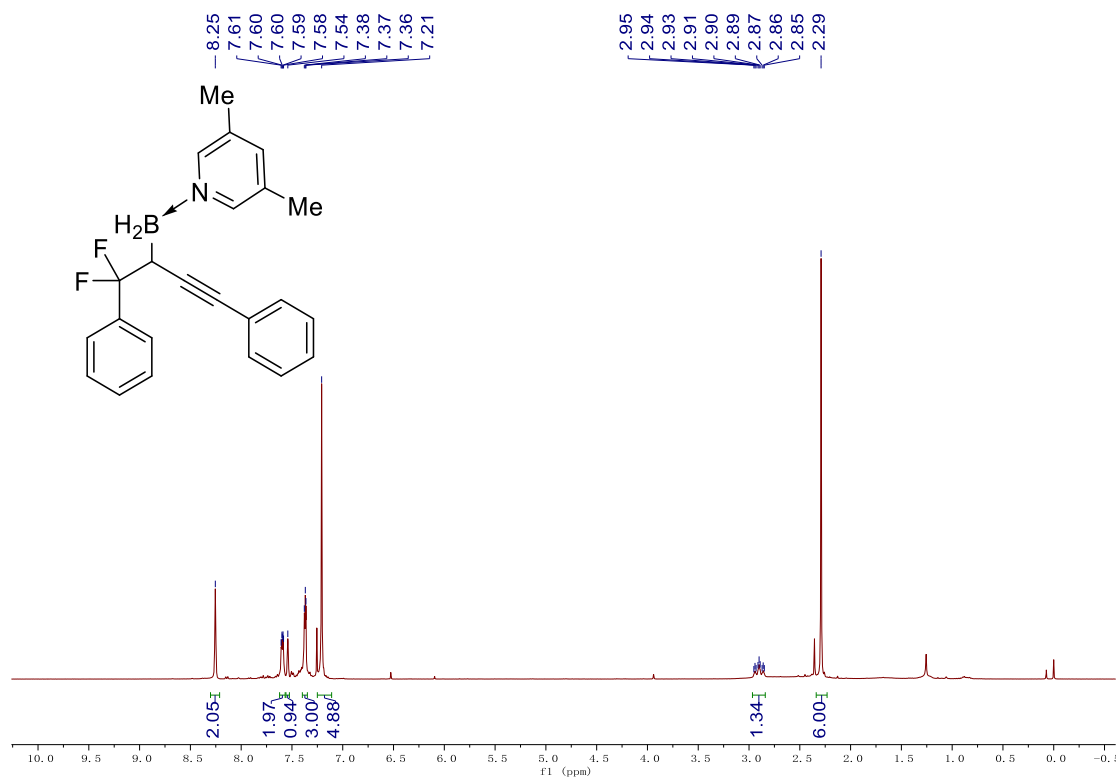

**(+)-3,5-dimethylpyridine-(1,1-difluoro-1,4-diphenylbut-3-yn-2-yl)borane (3ac):**

**<sup>13</sup>C NMR (101 MHz, CDCl<sub>3</sub>)**

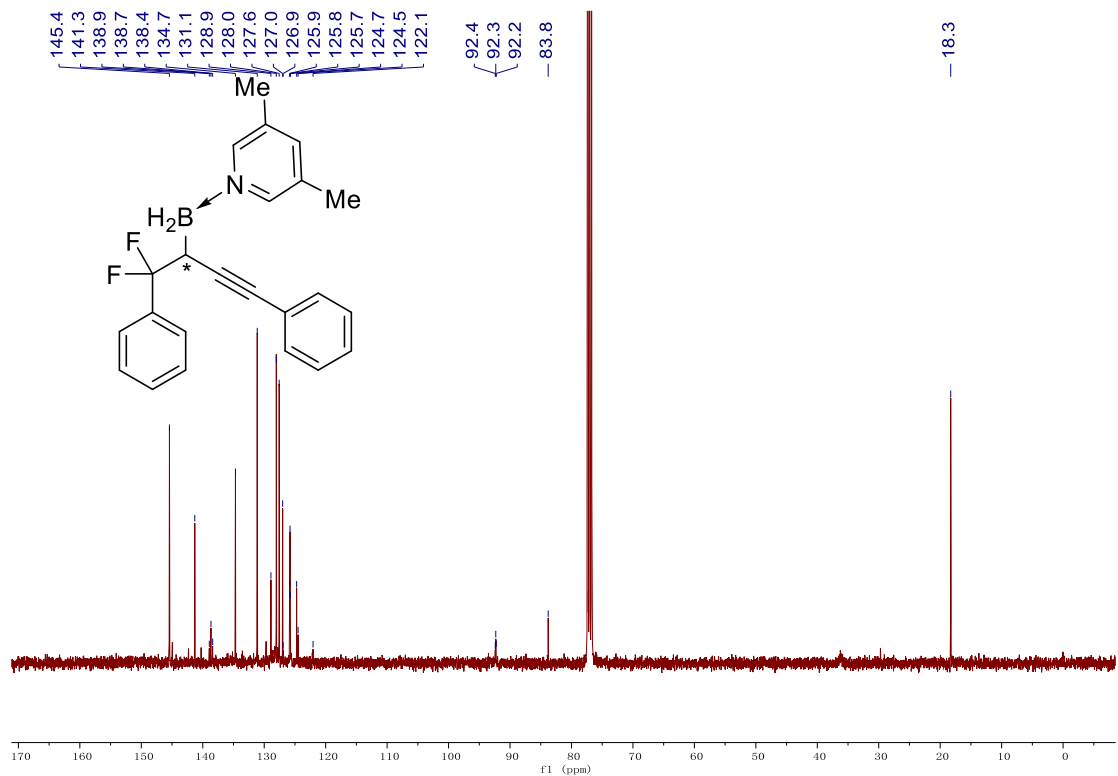

**(+)-3,5-dimethylpyridine-(1,1-difluoro-1,4-diphenylbut-3-yn-2-yl)borane (3ac):**  
 **$^{19}\text{F}$  NMR (376 MHz,  $\text{CDCl}_3$ )**

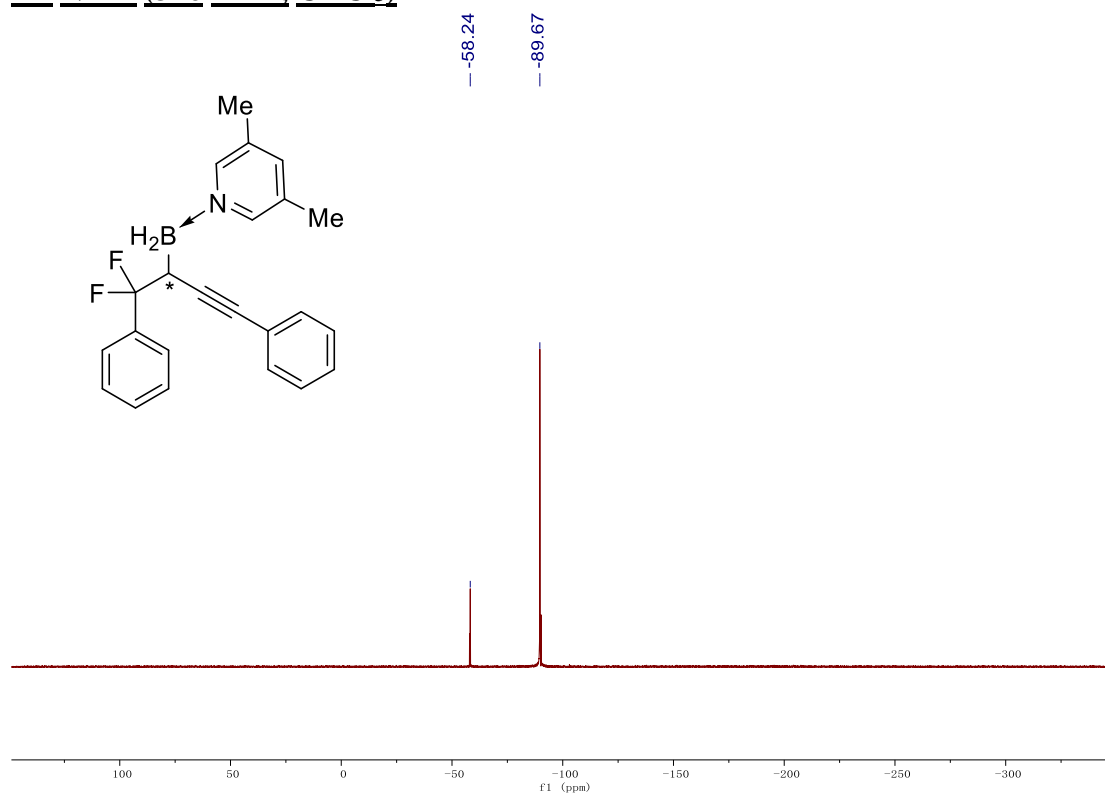

**(-)-tributylphosphane-(1,1-difluoro-1,4-diphenylbut-3-yn-2-yl)borane (3ad):**  **$^1\text{H}$  NMR (400 MHz,  $\text{CDCl}_3$ )**

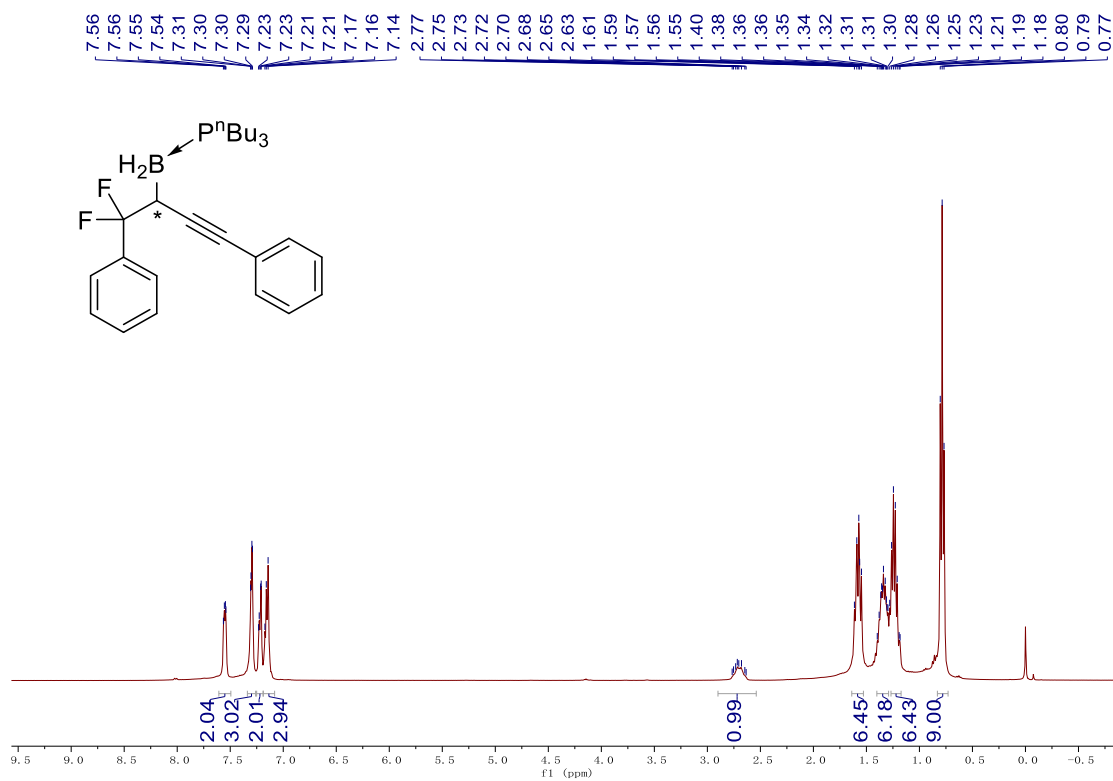

**(-)-tributylphosphane-(1,1-difluoro-1,4-diphenylbut-3-yn-2-yl)borane (3ad):  $^{13}\text{C}$**   
**NMR (101 MHz,  $\text{CDCl}_3$ )**

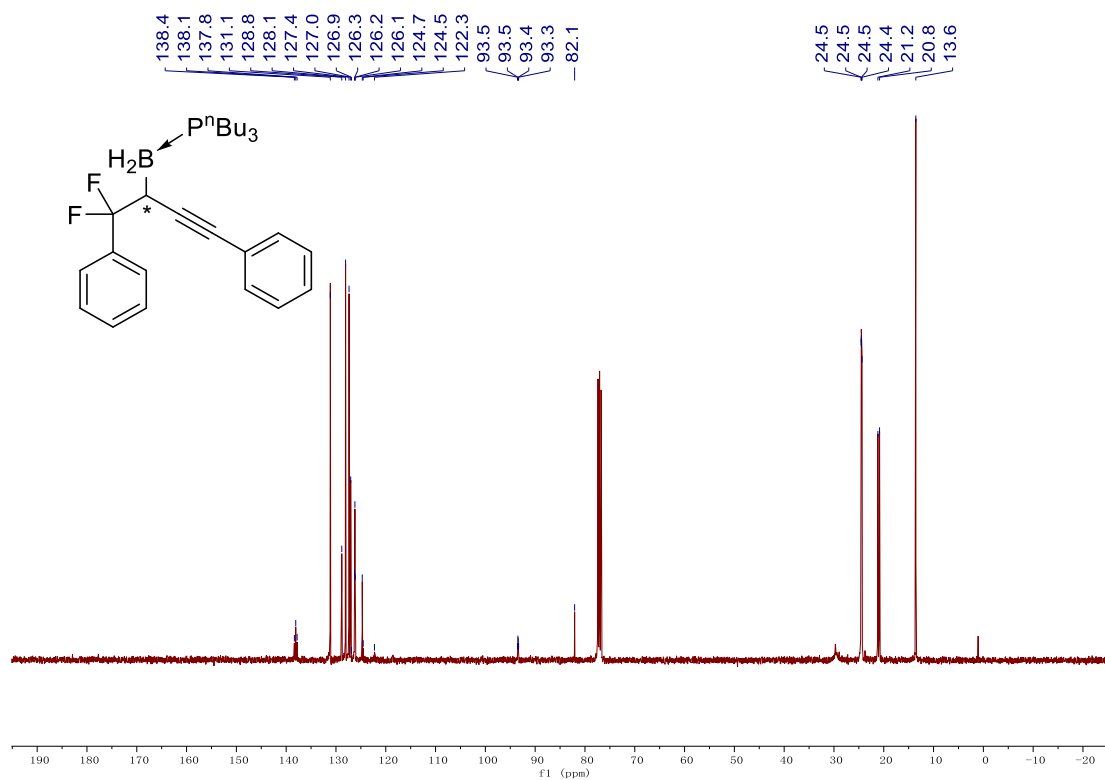

**(-)-tributylphosphane-(1,1-difluoro-1,4-diphenylbut-3-yn-2-yl)borane (3ad):  $^{19}\text{F}$**   
**NMR (376 MHz,  $\text{CDCl}_3$ )**

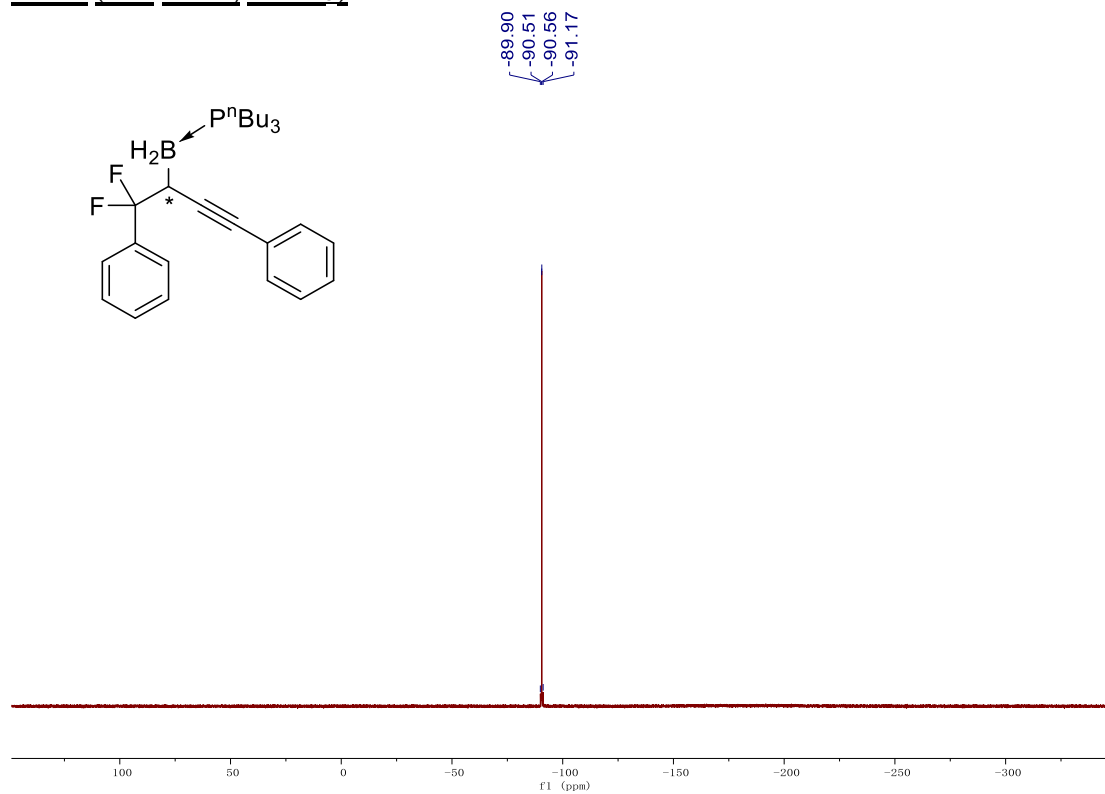



**(+)-(R)-Trimethylamine-(1,1-difluoro-4-phenyl-1-(*o*-tolyl)but-3-yn-2-yl)borane  
(3ba): <sup>1</sup>H NMR (400 MHz, CDCl<sub>3</sub>)**

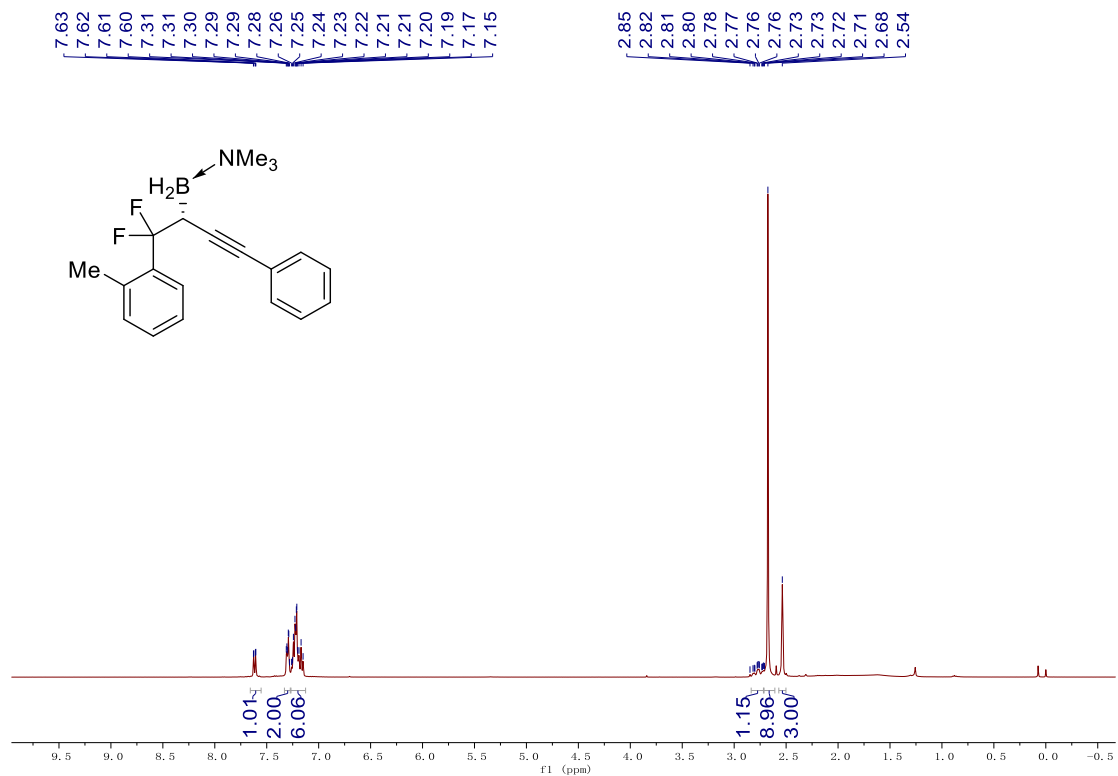

**(+)-(R)-Trimethylamine-(1,1-difluoro-4-phenyl-1-(*o*-tolyl)but-3-yn-2-yl)borane  
(3ba): <sup>13</sup>C NMR (101 MHz, CDCl<sub>3</sub>)**

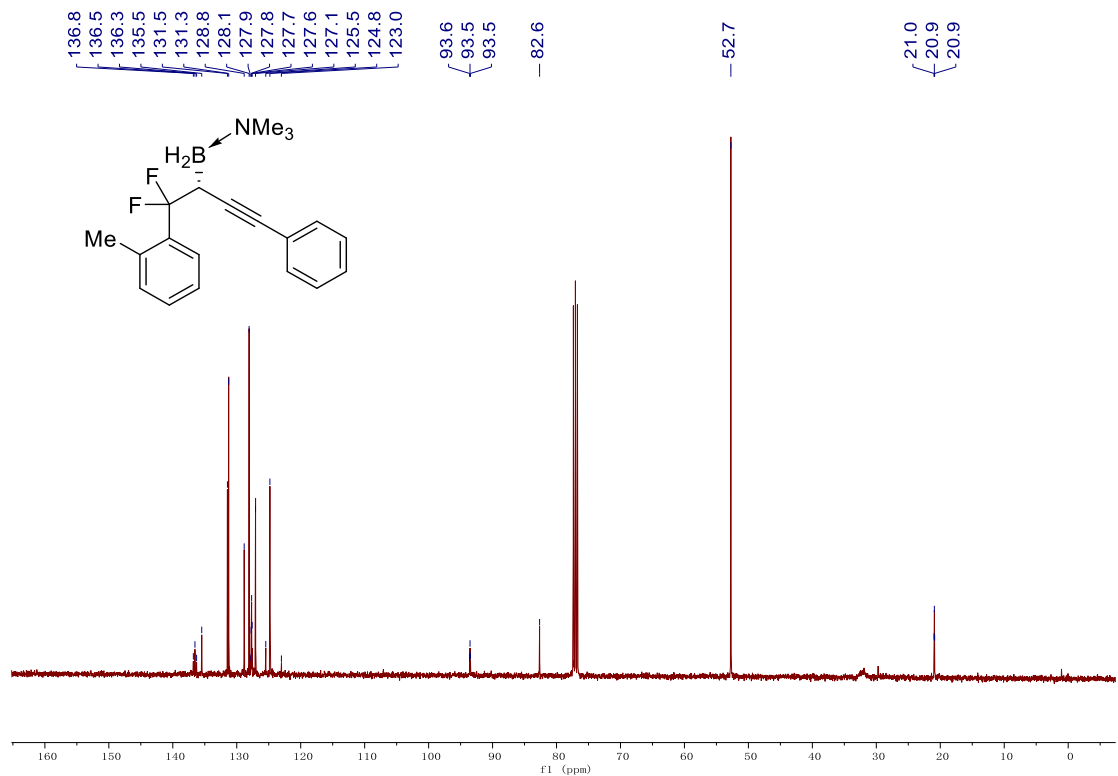

**(+)-(R)-Trimethylamine-(1,1-difluoro-4-phenyl-1-(*o*-tolyl)but-3-yn-2-yl)borane (3ba):  $^{19}\text{F}$  NMR (376 MHz,  $\text{CDCl}_3$ )**

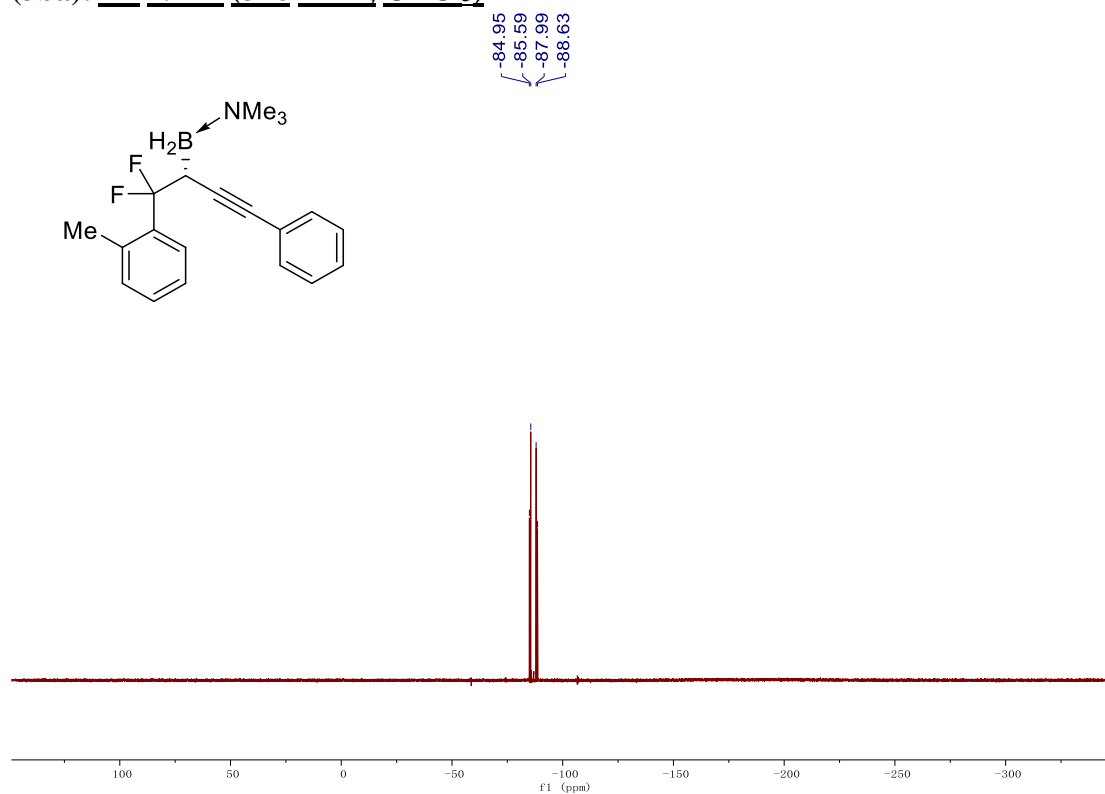

**(-)-Trimethylamine-(1,1-difluoro-4-phenyl-1-(*m*-tolyl)but-3-yn-2-yl)borane (3ca):  $^1\text{H}$  NMR (400 MHz,  $\text{CDCl}_3$ )**

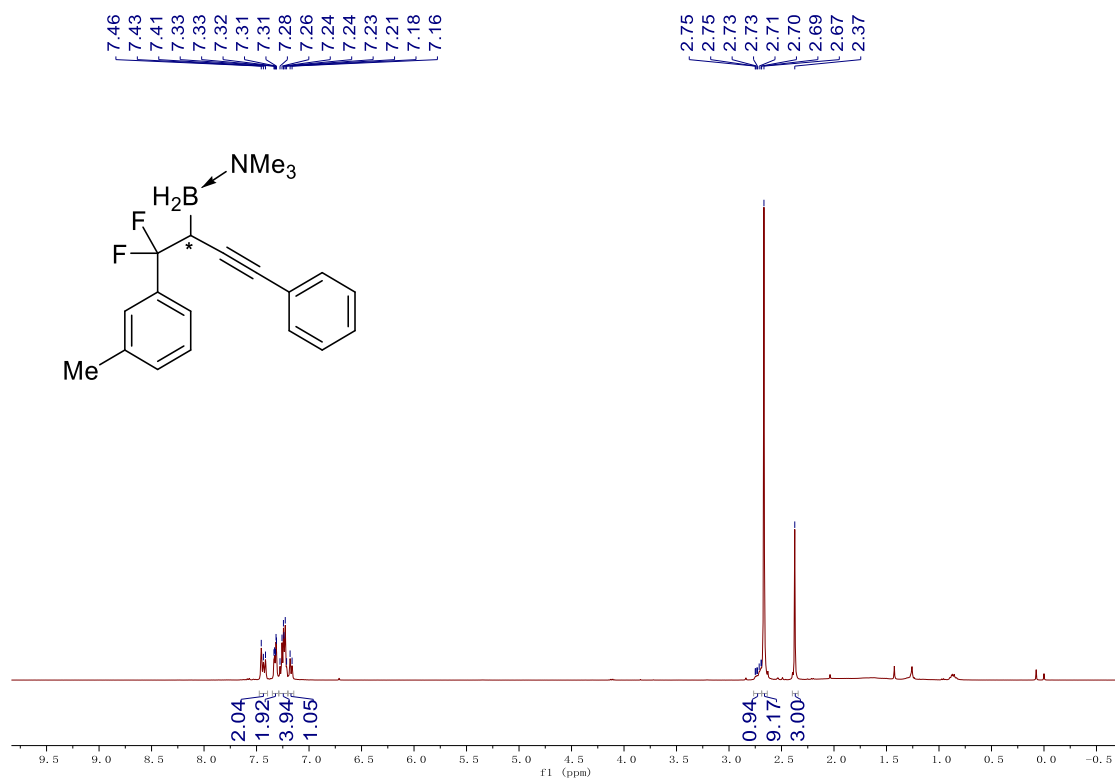

**(-)-Trimethylamine-(1,1-difluoro-4-phenyl-1-(*m*-tolyl)but-3-yn-2-yl)borane (3ca):**

**$^{13}\text{C}$  NMR (101 MHz,  $\text{CDCl}_3$ )**

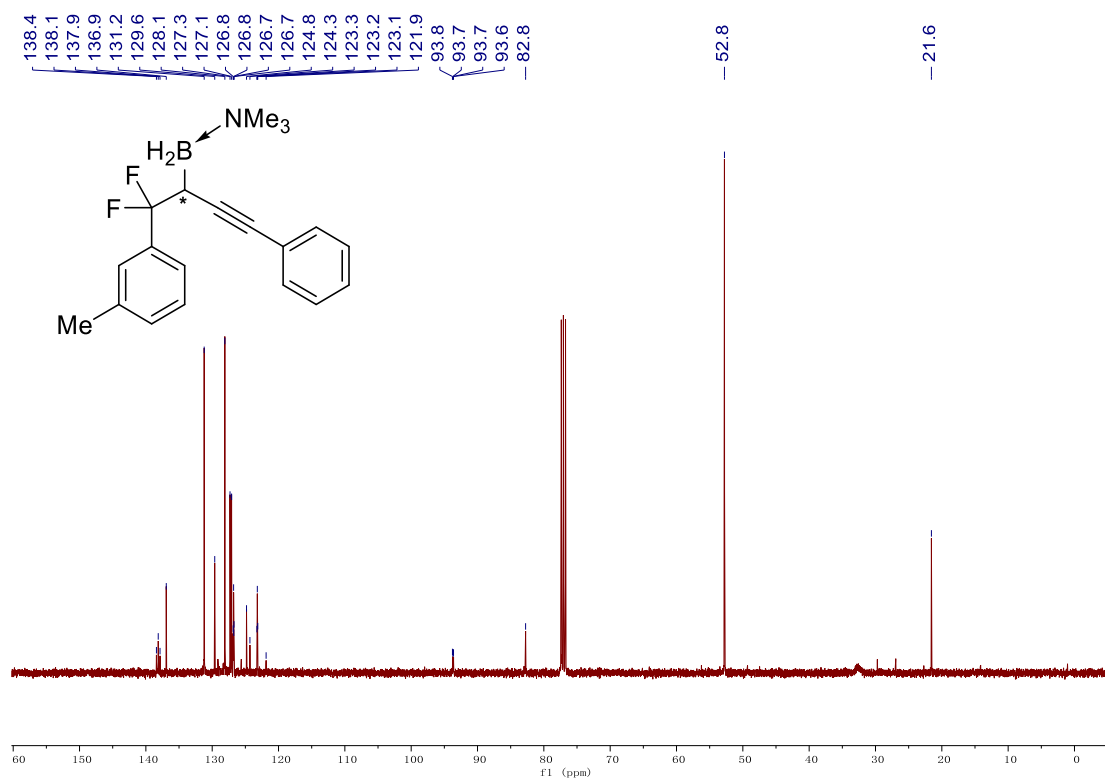

**(-)-Trimethylamine-(1,1-difluoro-4-phenyl-1-(*m*-tolyl)but-3-yn-2-yl)borane (3ca):**

**$^{19}\text{F}$  NMR (376 MHz,  $\text{CDCl}_3$ )**

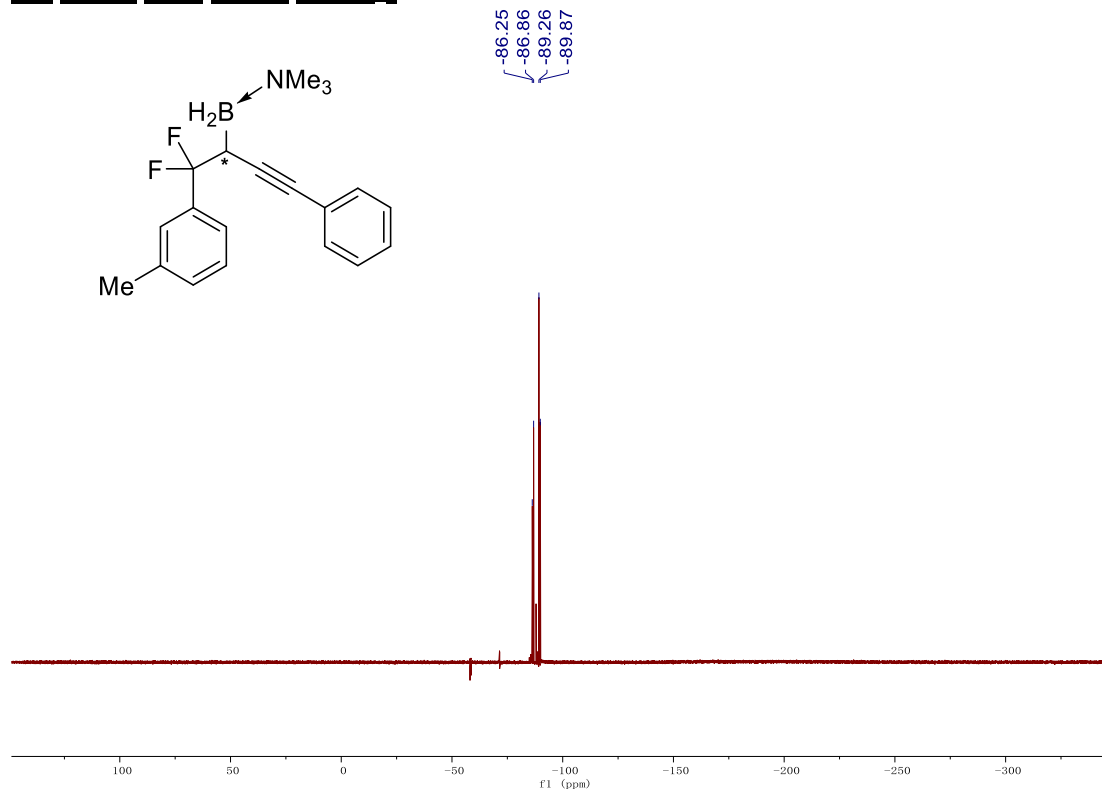

**(+)-Trimethylamine-(1-(2-chlorophenyl)-1,1-difluoro-4-phenylbut-3-yn-2-yl)borane (3da):  $^1\text{H}$  NMR (400 MHz,  $\text{CDCl}_3$ )**

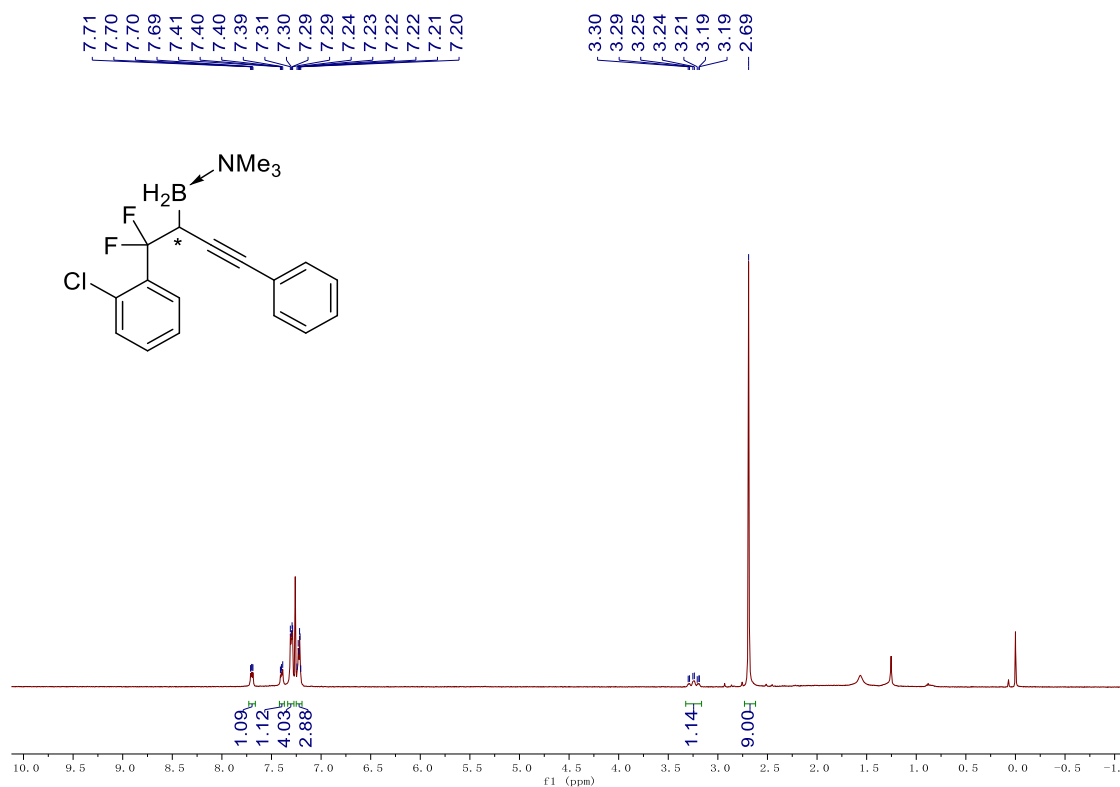

**(+)-Trimethylamine-(1-(2-chlorophenyl)-1,1-difluoro-4-phenylbut-3-yn-2-yl)borane (3da):  $^{13}\text{C}$  NMR (101 MHz,  $\text{CDCl}_3$ )**

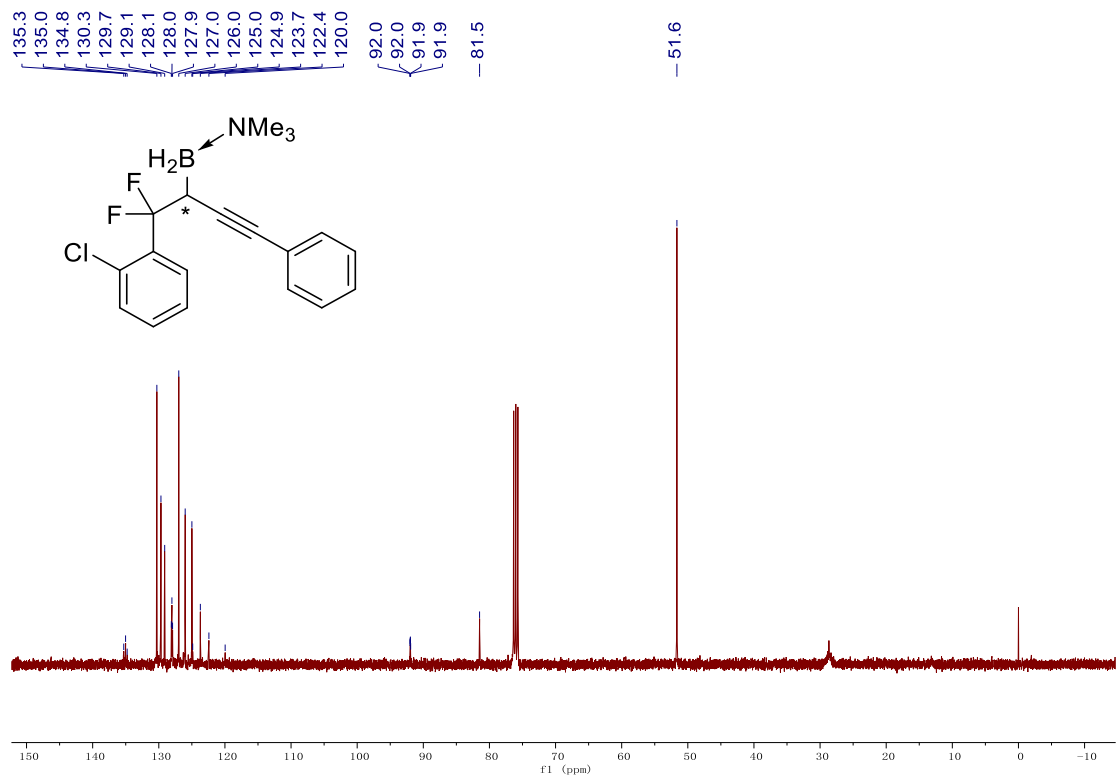

**(+)-Trimethylamine-(1-(2-chlorophenyl)-1,1-difluoro-4-phenylbut-3-yn-2-yl)borane (3da):  $^{19}\text{F}$  NMR (376 MHz,  $\text{CDCl}_3$ )**

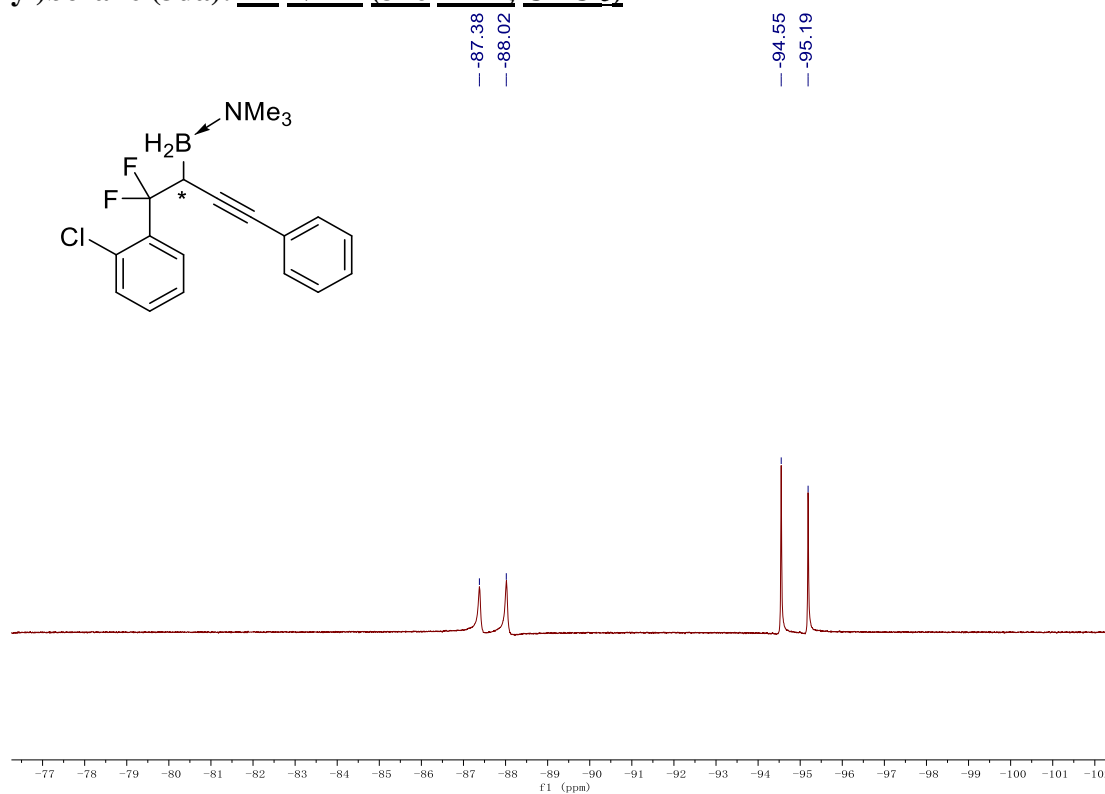

**(-)-Trimethylamine-(1-(3-chlorophenyl)-1,1-difluoro-4-phenylbut-3-yn-2-yl)borane (3ea):  $^1\text{H}$  NMR (400 MHz,  $\text{CDCl}_3$ )**

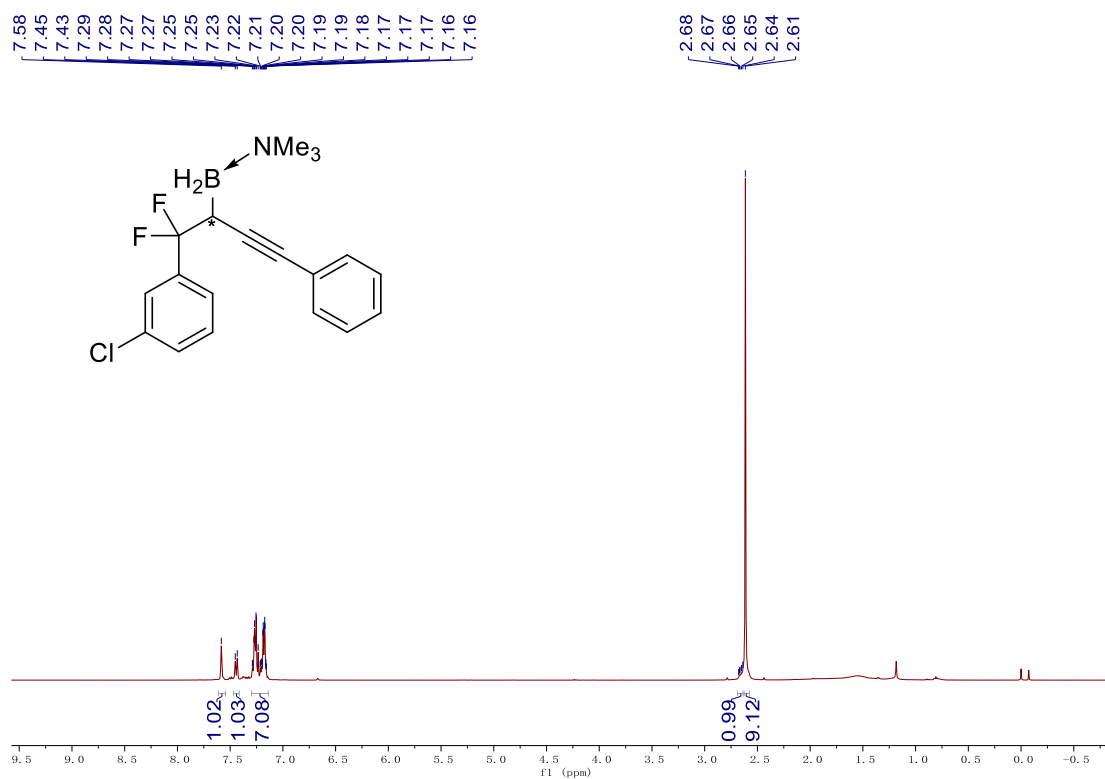

**(-)-Trimethylamine-(1-(3-chlorophenyl)-1,1-difluoro-4-phenylbut-3-yn-2-yl)borane (3ea):  $^{13}\text{C}$  NMR (101 MHz,  $\text{CDCl}_3$ )**

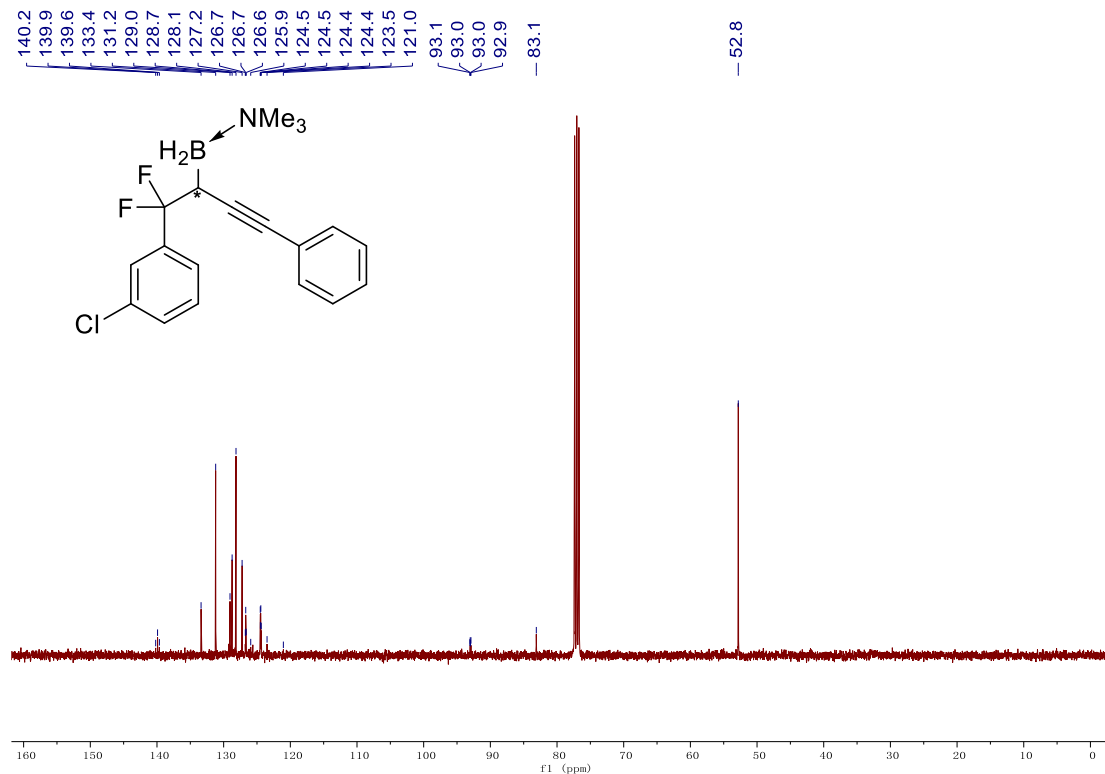

**(-)-Trimethylamine-(1-(3-chlorophenyl)-1,1-difluoro-4-phenylbut-3-yn-2-yl)borane (3ea):  $^{19}\text{F}$  NMR (376 MHz,  $\text{CDCl}_3$ )**

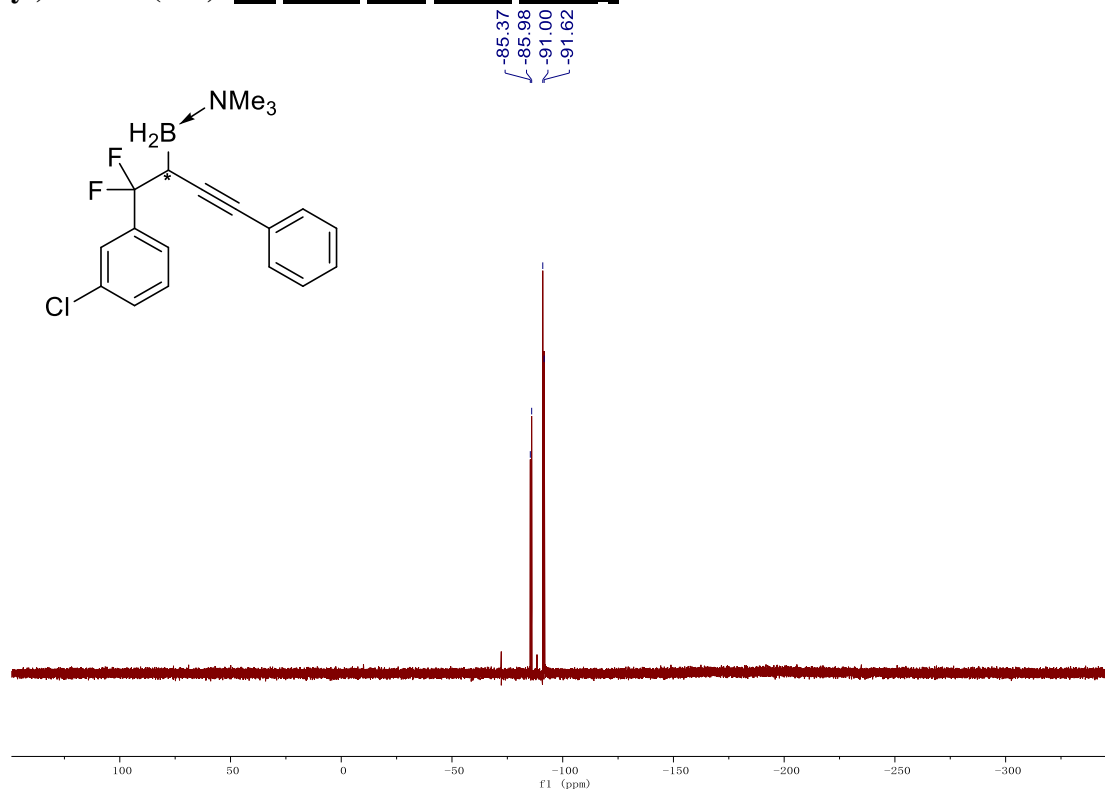

**(-)-(R)-Trimethylamine-(1-(4-chlorophenyl)-1,1-difluoro-4-phenylbut-3-yn-2-yl)borane (3fa):  $^1\text{H}$  NMR (400 MHz,  $\text{CDCl}_3$ )**

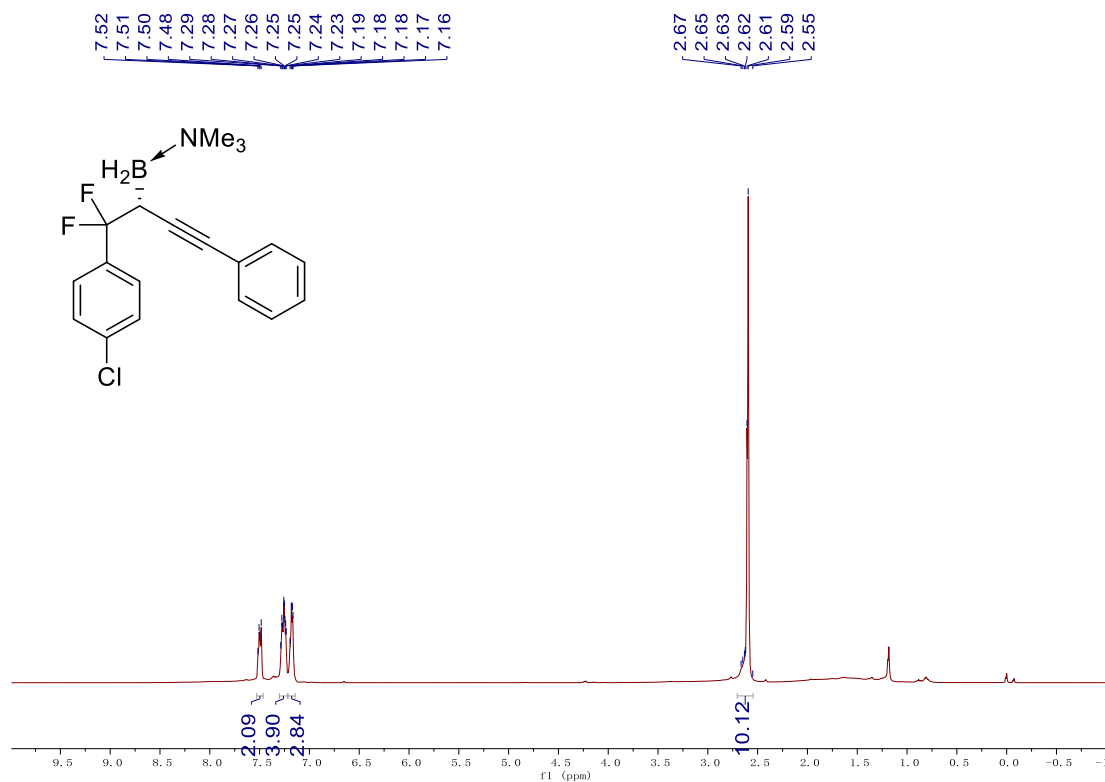

**(-)-(R)-Trimethylamine-(1-(4-chlorophenyl)-1,1-difluoro-4-phenylbut-3-yn-2-yl)borane (3fa):  $^{13}\text{C}$  NMR (101 MHz,  $\text{CDCl}_3$ )**

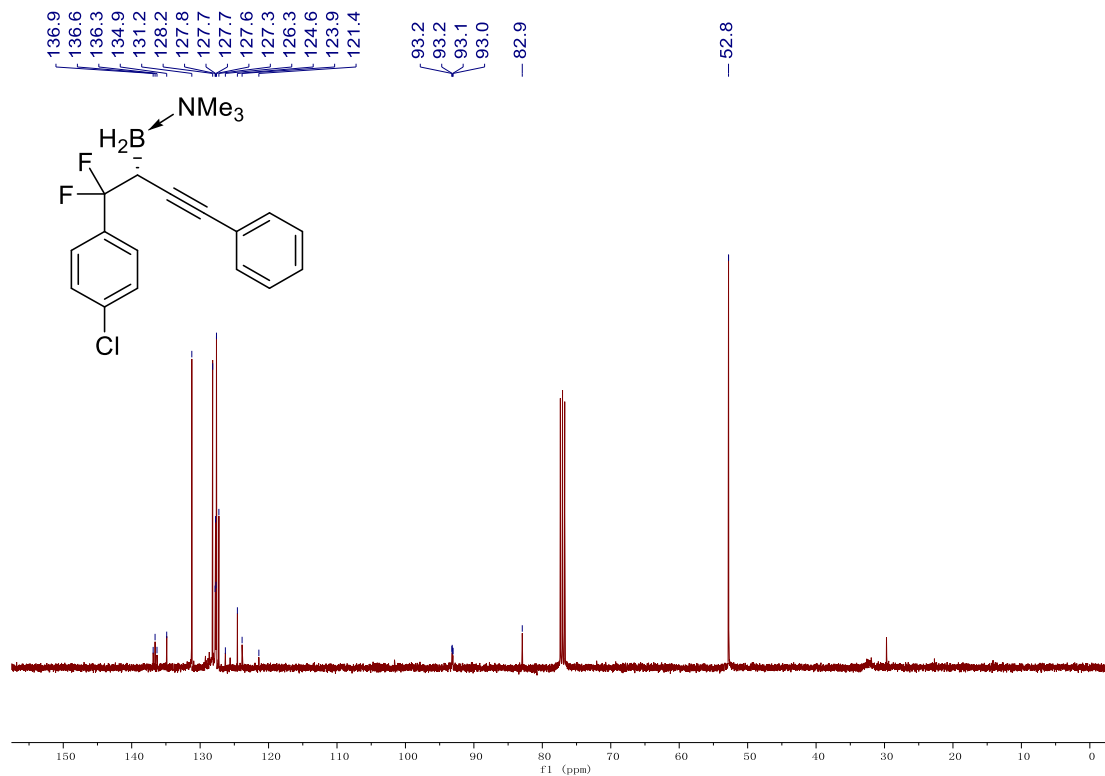

**(-)-(R)-Trimethylamine-(1-(4-chlorophenyl)-1,1-difluoro-4-phenylbut-3-yn-2-yl)borane (3fa):  $^{19}\text{F}$  NMR (376 MHz,  $\text{CDCl}_3$ )**

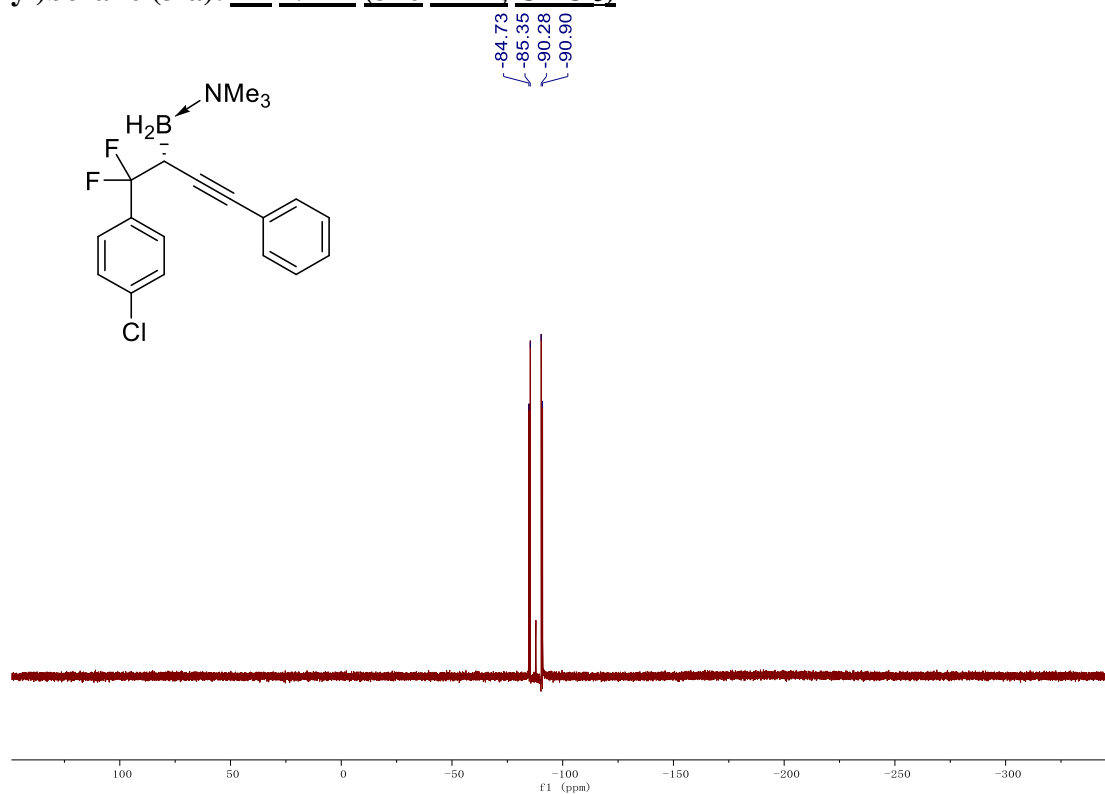

**(+)-Trimethylamine-(1,1-difluoro-1-(2-fluorophenyl)-4-phenylbut-3-yn-2-yl)borane (3ga):  $^1\text{H}$  NMR (400 MHz,  $\text{CDCl}_3$ )**

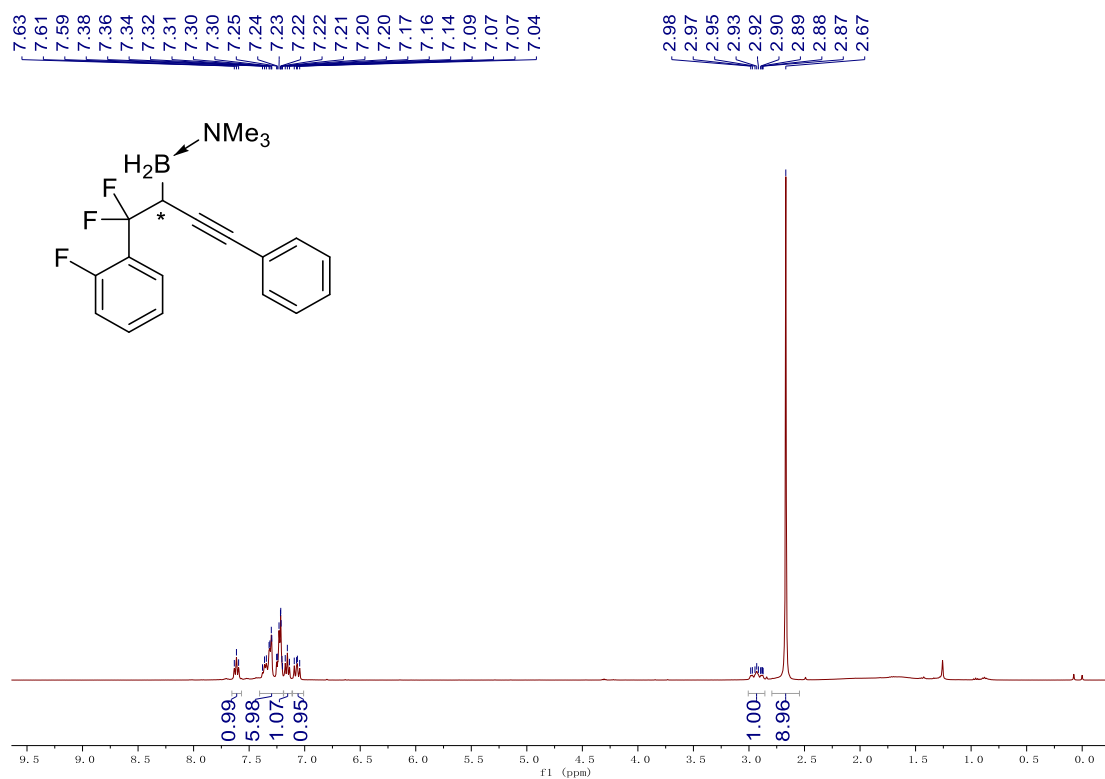



**(+)-Trimethylamine-(1,1-difluoro-1-(2-fluorophenyl)-4-phenylbut-3-yn-2-yl)borane (3ga):  $^{13}\text{C}$  NMR (101 MHz,  $\text{CDCl}_3$ )**

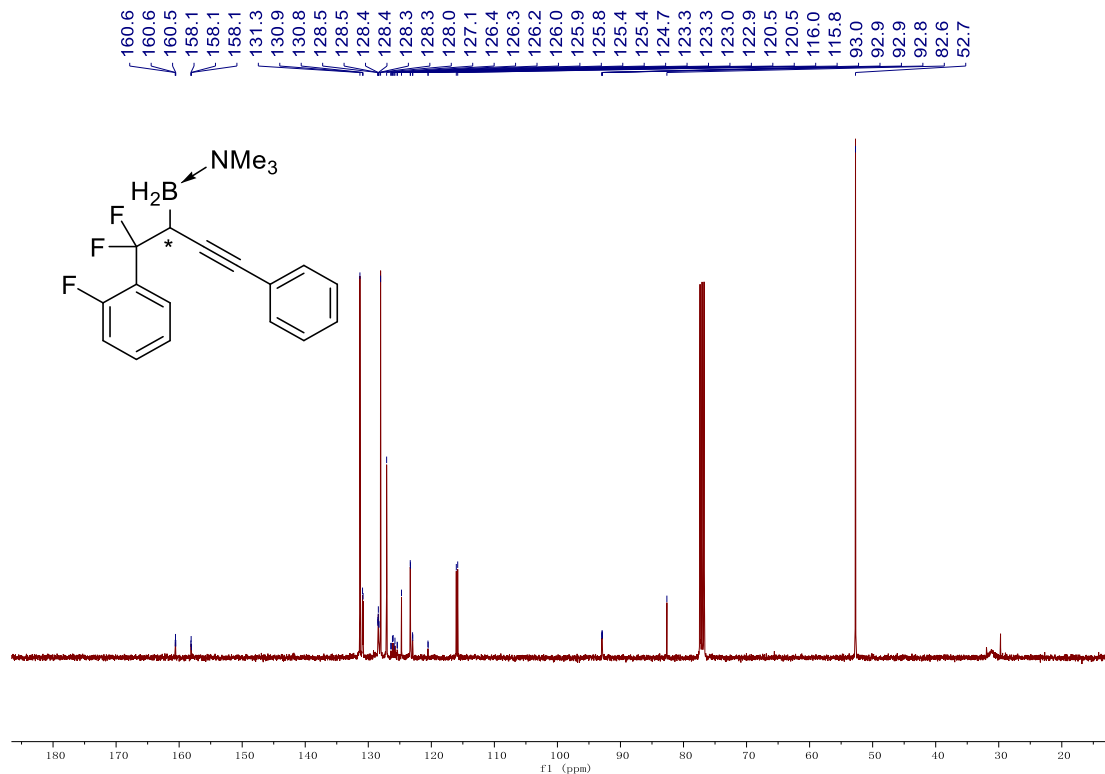

**(+)-Trimethylamine-(1,1-difluoro-1-(2-fluorophenyl)-4-phenylbut-3-yn-2-yl)borane (3ga):  $^{19}\text{F}$  NMR (376 MHz,  $\text{CDCl}_3$ )**

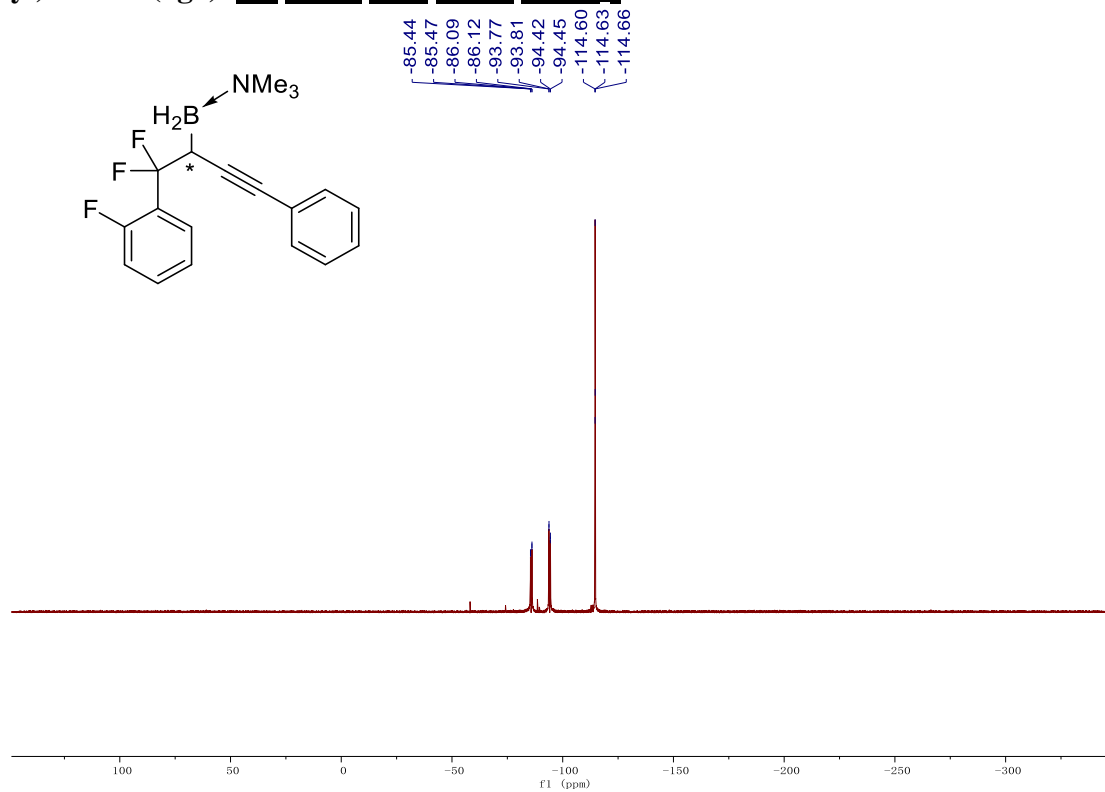

**(+)-Trimethylamine-(1,1-difluoro-1-(naphthalen-1-yl)-4-phenylbut-3-yn-2-yl)borane (3ha):  $^1\text{H}$  NMR (400 MHz,  $\text{CDCl}_3$ )**

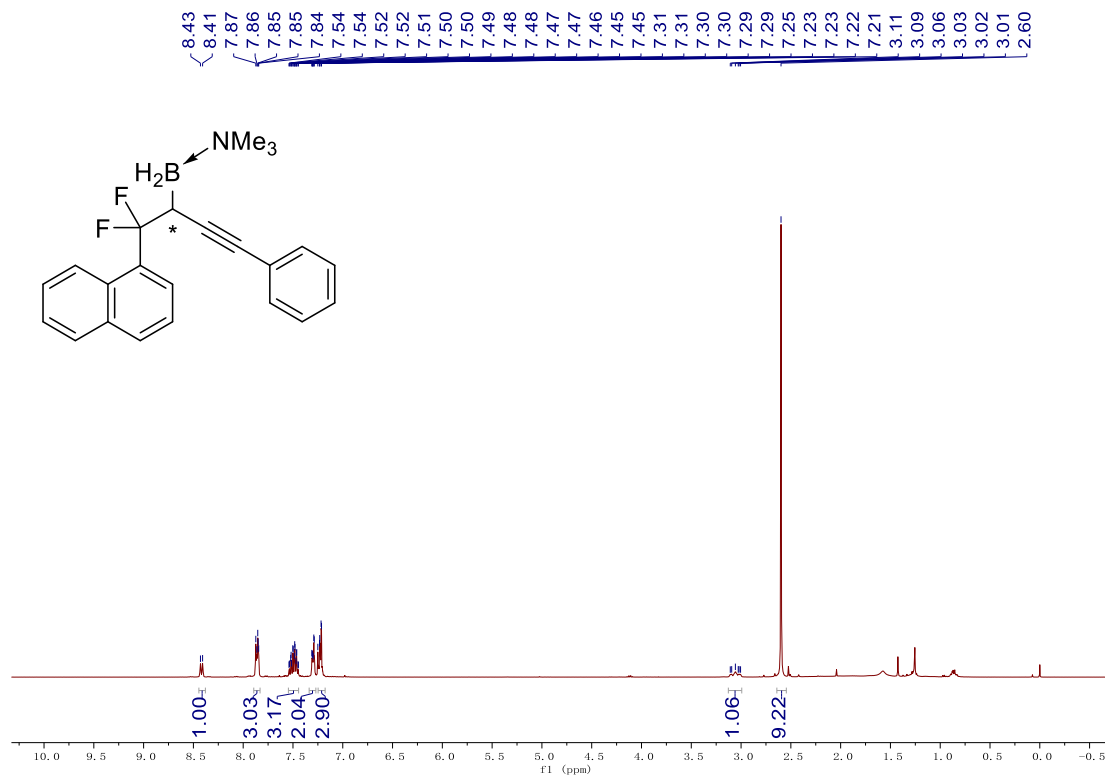

**(+)-Trimethylamine-(1,1-difluoro-1-(naphthalen-1-yl)-4-phenylbut-3-yn-2-yl)borane (3ha):  $^{13}\text{C}$  NMR (101 MHz,  $\text{CDCl}_3$ )**

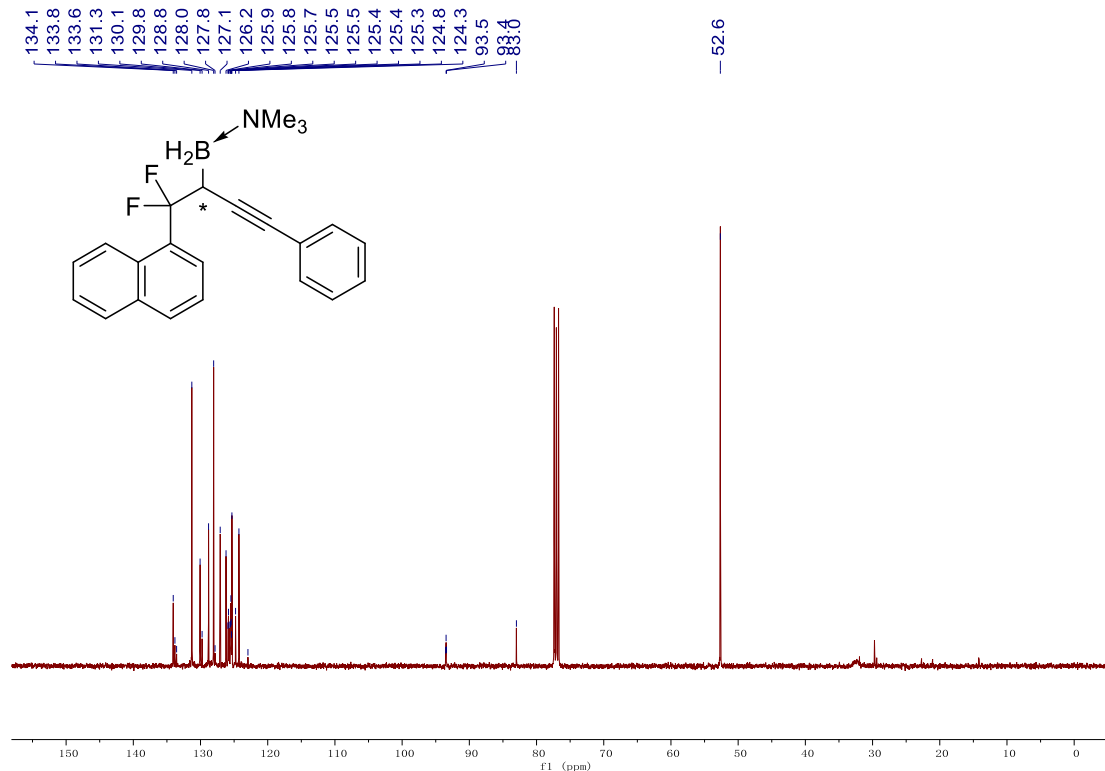

**(+)-Trimethylamine-(1,1-difluoro-1-(naphthalen-1-yl)-4-phenylbut-3-yn-2-yl)borane (3ha):  $^{19}\text{F}$  NMR (376 MHz,  $\text{CDCl}_3$ )**

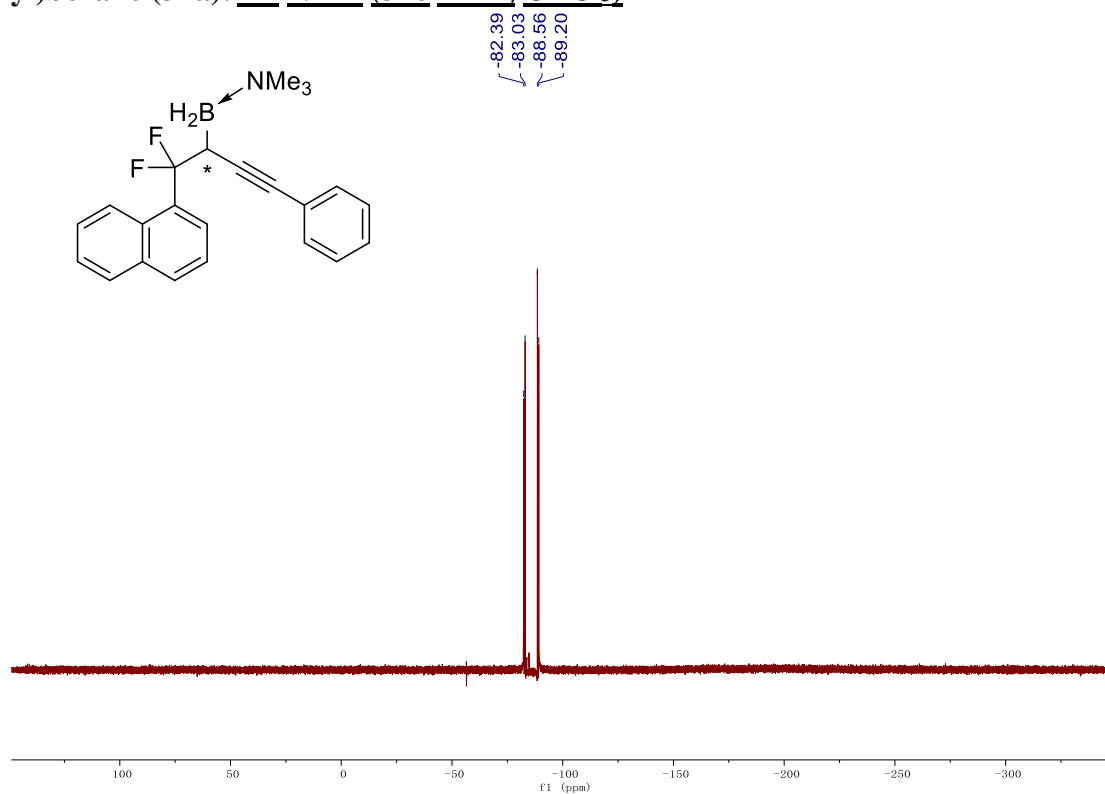

**(-)-Trimethylamine-(1,1-difluoro-1-(4-nitrophenyl)-4-phenylbut-3-yn-2-yl)borane (3ia):  $^1\text{H}$  NMR (400 MHz,  $\text{CDCl}_3$ )**

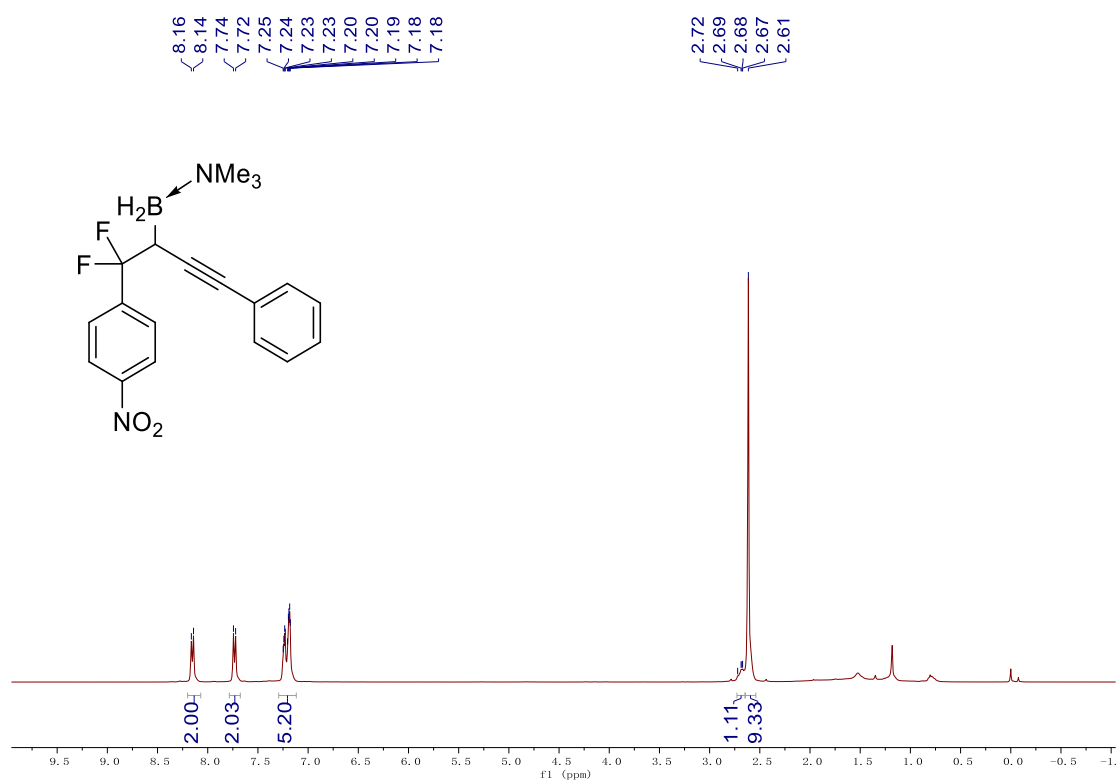

**(-)-Trimethylamine-(1,1-difluoro-1-(4-nitrophenyl)-4-phenylbut-3-yn-2-yl)borane (3ia):  $^{13}\text{C}$  NMR (101 MHz,  $\text{CDCl}_3$ )**

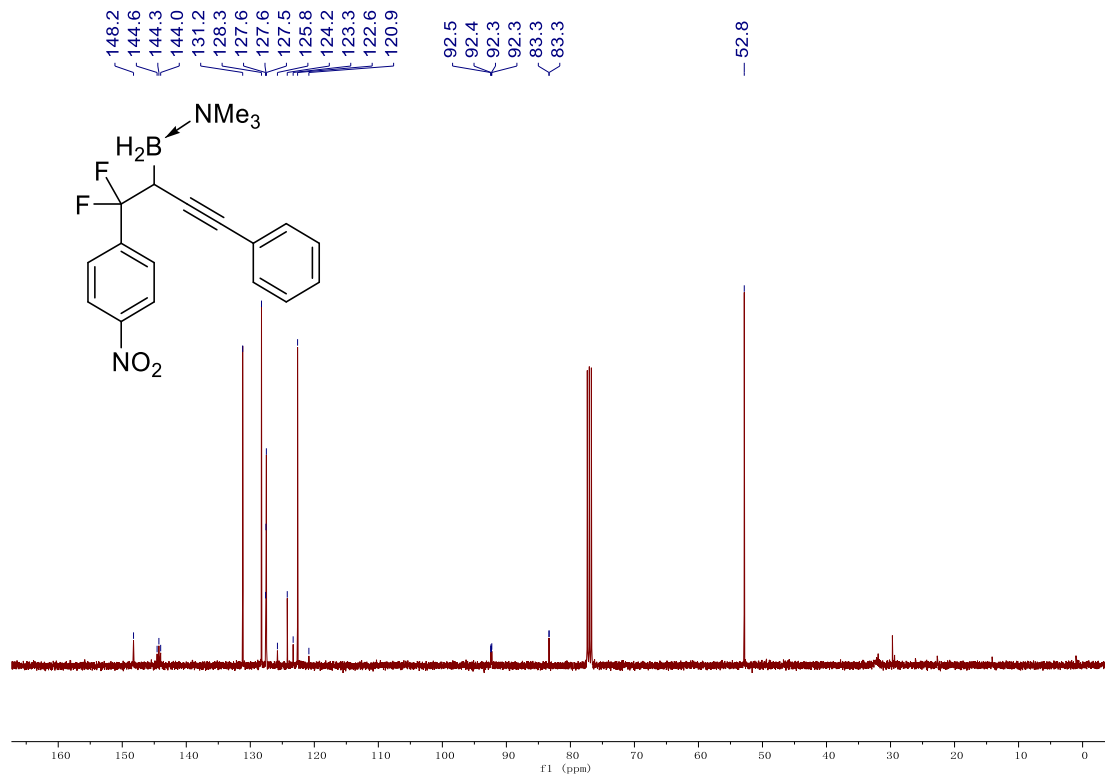

**(-)-Trimethylamine-(1,1-difluoro-1-(4-nitrophenyl)-4-phenylbut-3-yn-2-yl)borane (3ia):  $^{19}\text{F}$  NMR (376 MHz,  $\text{CDCl}_3$ )**

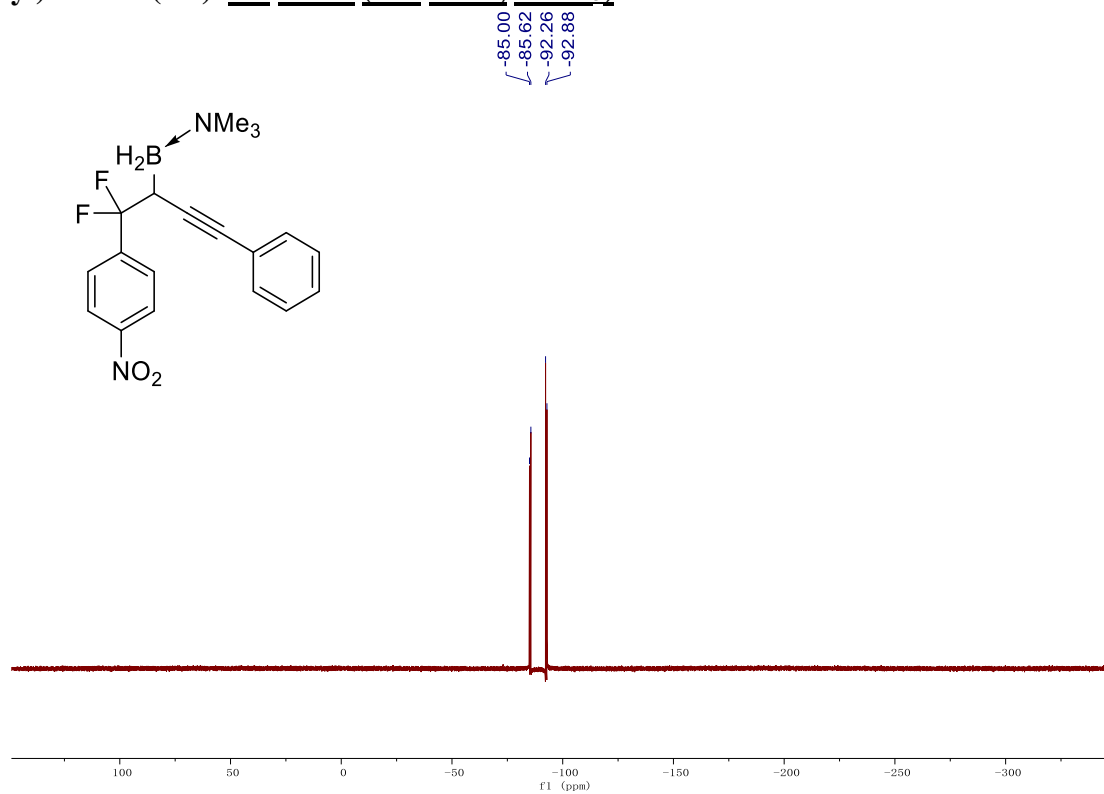

**(+)-Trimethylamine-(1,1-difluoro-1,4-di-*o*-tolylbut-3-yn-2-yl)borane (3ja): <sup>1</sup>H NMR (400 MHz, CDCl<sub>3</sub>)**

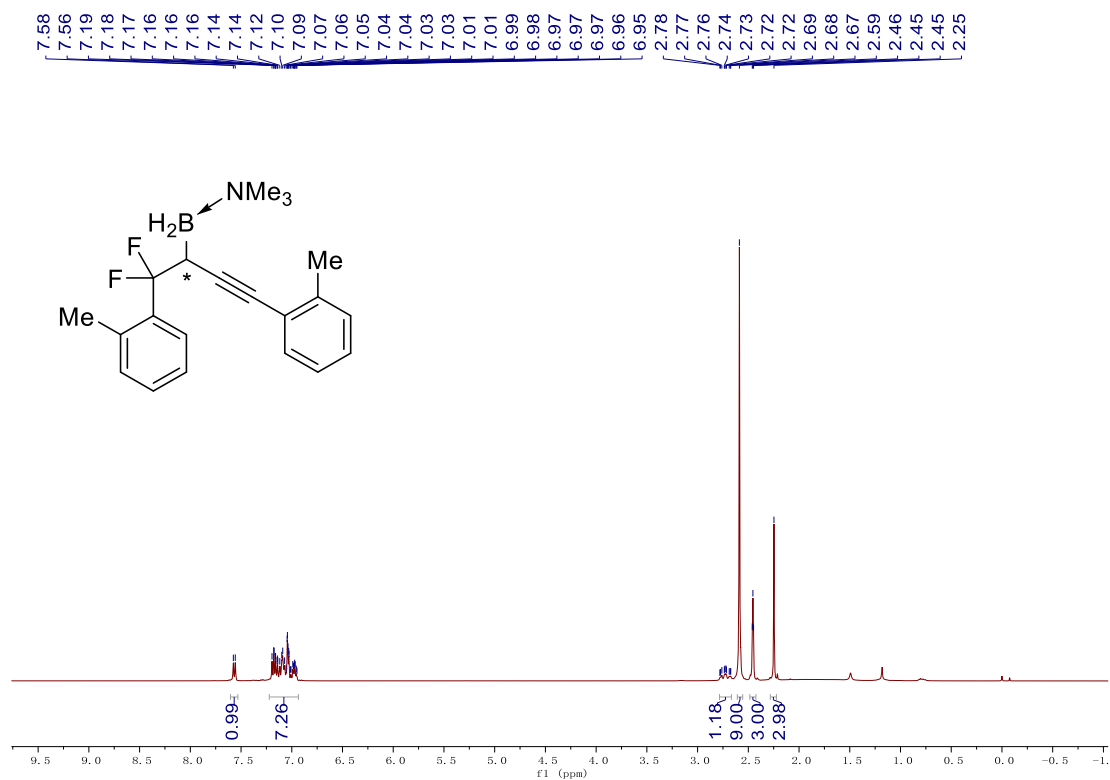

**(+)-Trimethylamine-(1,1-difluoro-1,4-di-*o*-tolylbut-3-yn-2-yl)borane (3ja): <sup>13</sup>C NMR (101 MHz, CDCl<sub>3</sub>)**

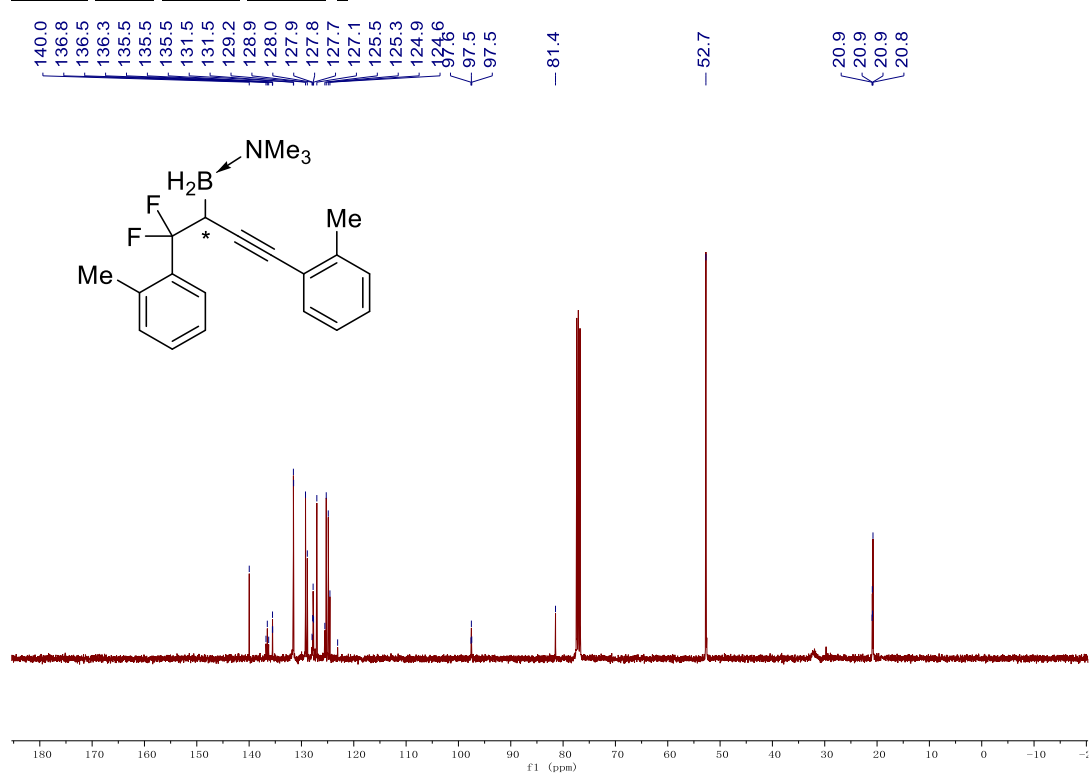

**(+)-Trimethylamine-(1,1-difluoro-1,4-di-*o*-tolylbut-3-yn-2-yl)borane (3ja):  $^{19}\text{F}$  NMR (376 MHz,  $\text{CDCl}_3$ )**

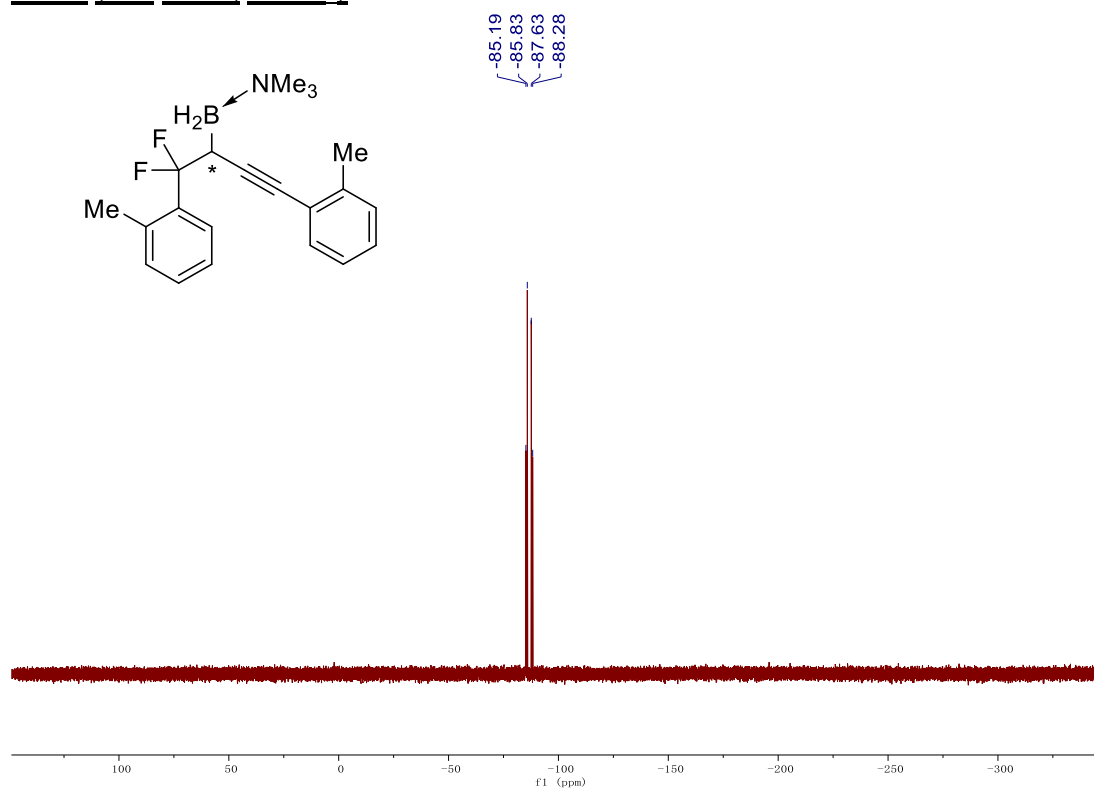

**(+)-Trimethylamine-(1,1-difluoro-4-(*m*-tolyl)-1-(*o*-tolyl)but-3-yn-2-yl)borane (3ka):  $^1\text{H}$  NMR (400 MHz,  $\text{CDCl}_3$ )**

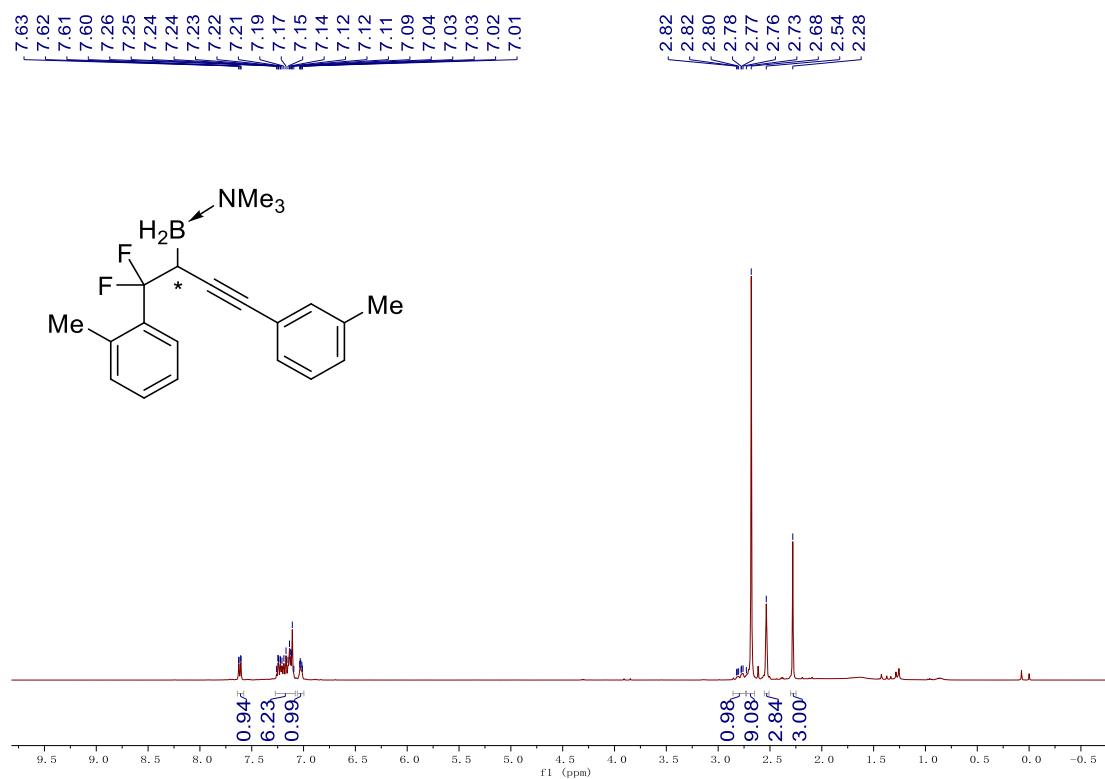

**(+)-Trimethylamine-(1,1-difluoro-4-(*m*-tolyl)-1-(*o*-tolyl)but-3-yn-2-yl)borane**

**(3ka):  $^{13}\text{C}$  NMR (101 MHz,  $\text{CDCl}_3$ )**

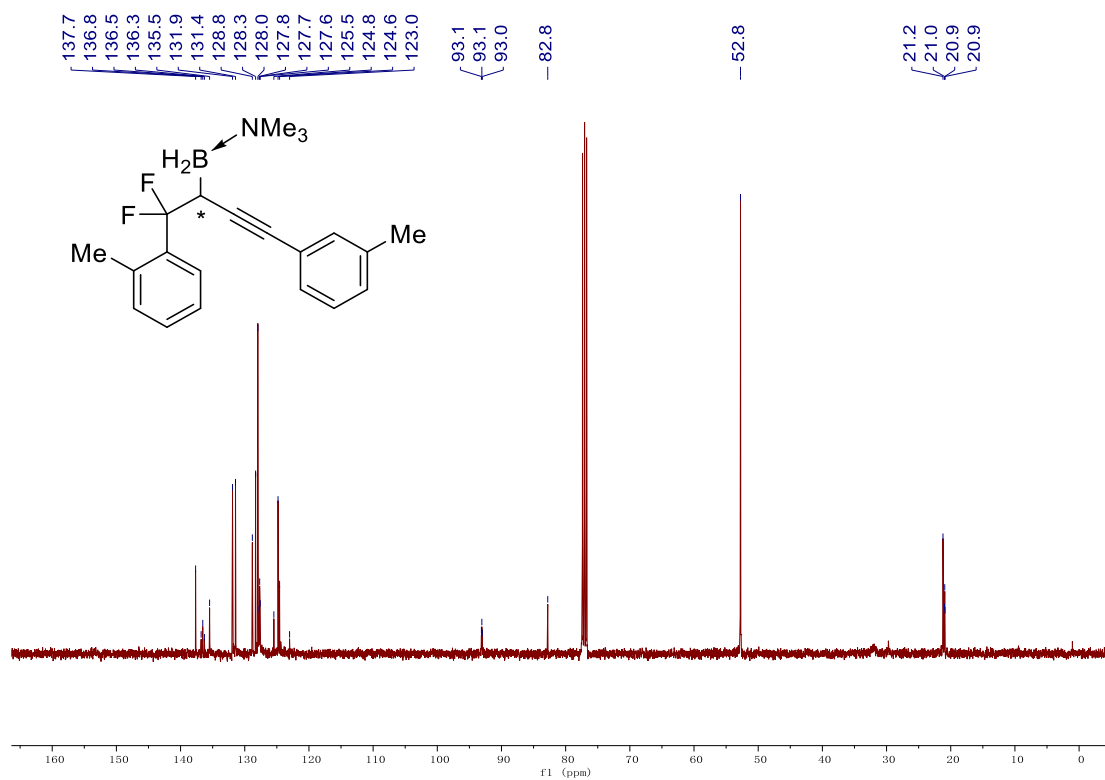

**(+)-Trimethylamine-(1,1-difluoro-4-(*m*-tolyl)-1-(*o*-tolyl)but-3-yn-2-yl)borane**

**(3ka):  $^{19}\text{F}$  NMR (376 MHz,  $\text{CDCl}_3$ )**

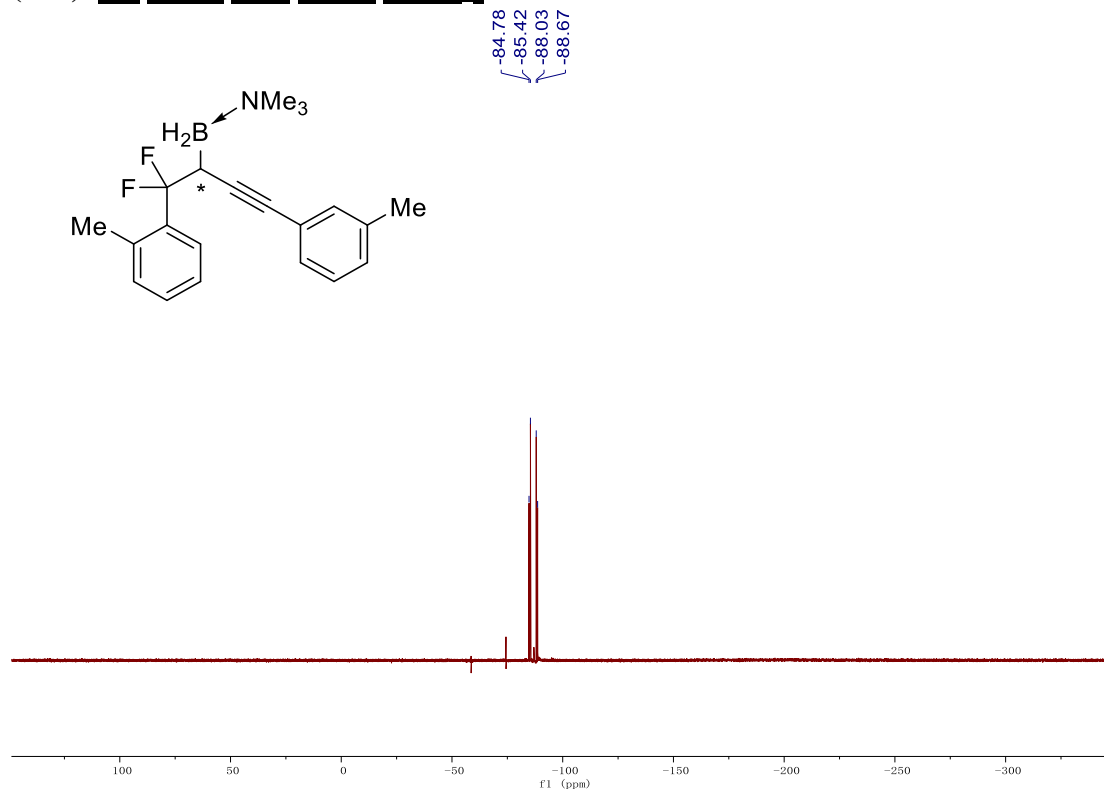

**(+)-Trimethylamine-(1,1-difluoro-1-(*o*-tolyl)-4-(*p*-tolyl)but-3-yn-2-yl)borane  
(3a):  $^1\text{H}$  NMR (400 MHz,  $\text{CDCl}_3$ )**

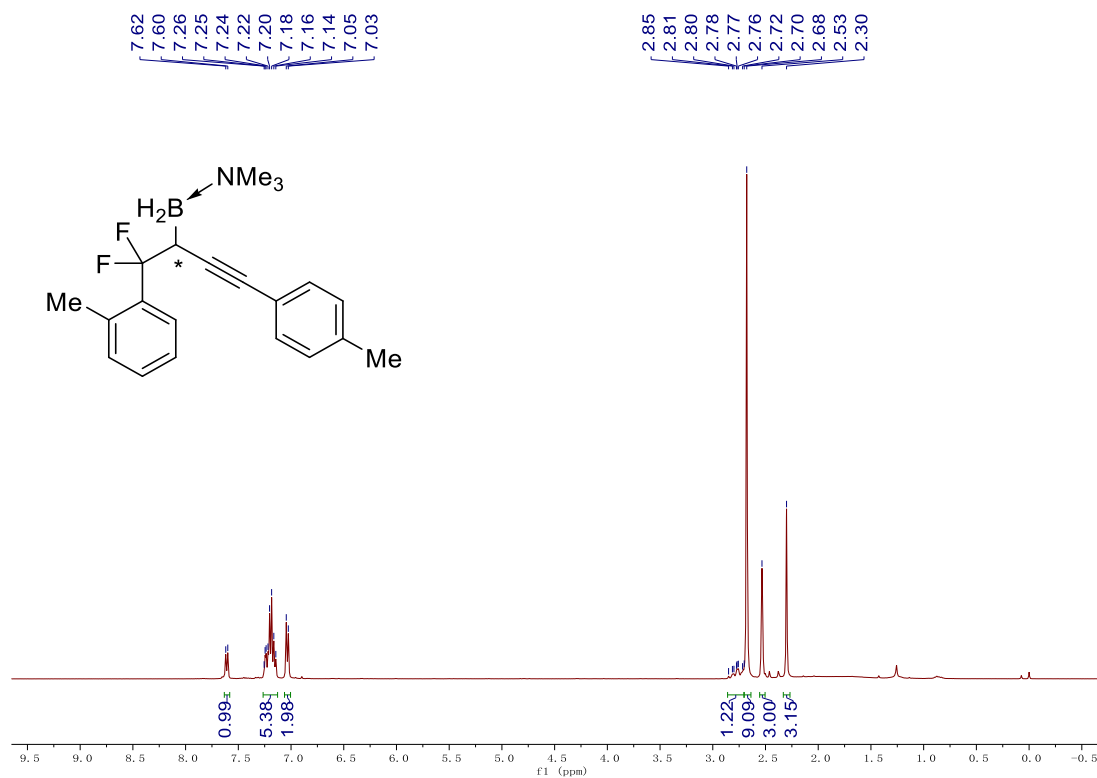

**(+)-Trimethylamine-(1,1-difluoro-1-(*o*-tolyl)-4-(*p*-tolyl)but-3-yn-2-yl)borane  
(3a):  $^{13}\text{C}$  NMR (101 MHz,  $\text{CDCl}_3$ )**

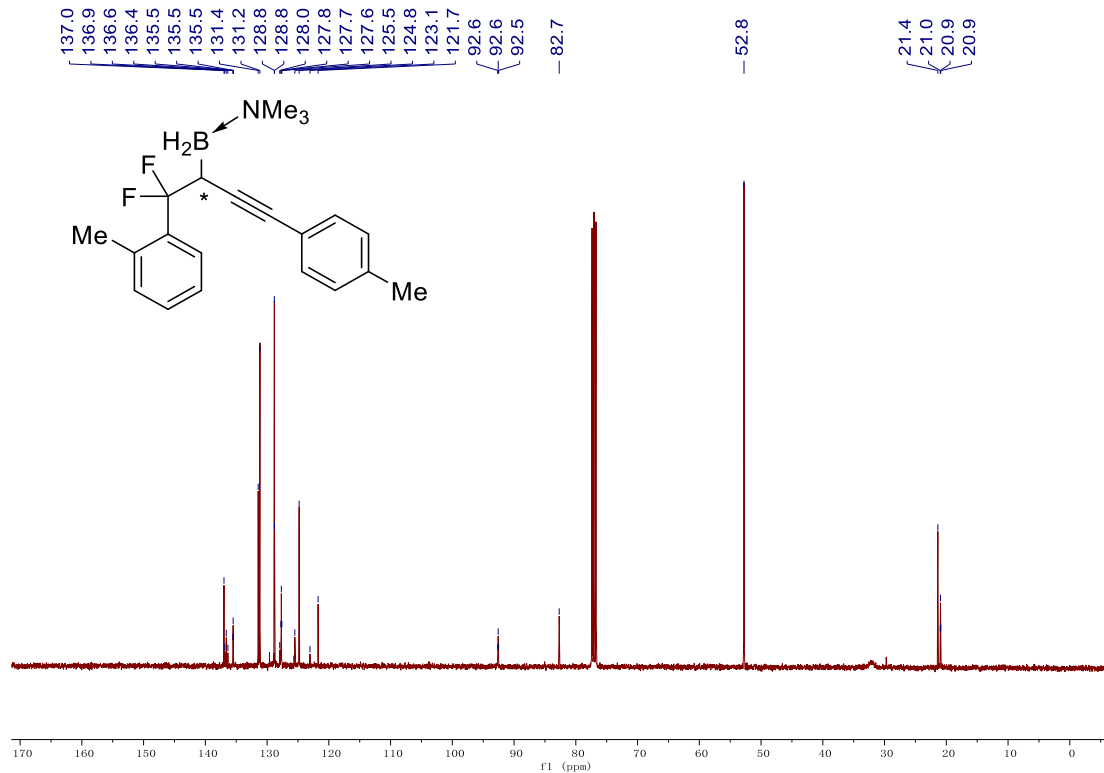



**(+)-Trimethylamine-(1,1-difluoro-1-(*o*-tolyl)-4-(*p*-tolyl)but-3-yn-2-yl)borane  
(3la): <sup>19</sup>F NMR (376 MHz, CDCl<sub>3</sub>)**

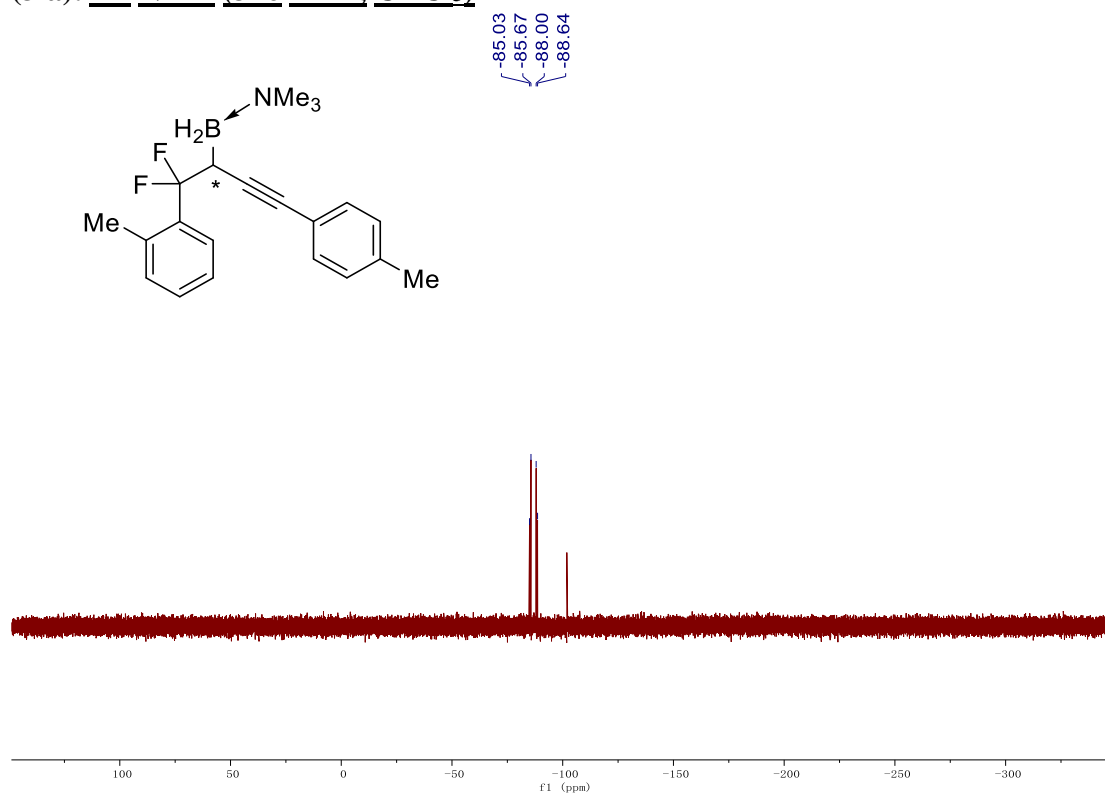

**(+)-Trimethylamine-(4-(2-chlorophenyl)-1,1-difluoro-1-(*o*-tolyl)but-3-yn-2-yl)borane (3ma): <sup>1</sup>H NMR (400 MHz, CDCl<sub>3</sub>)**

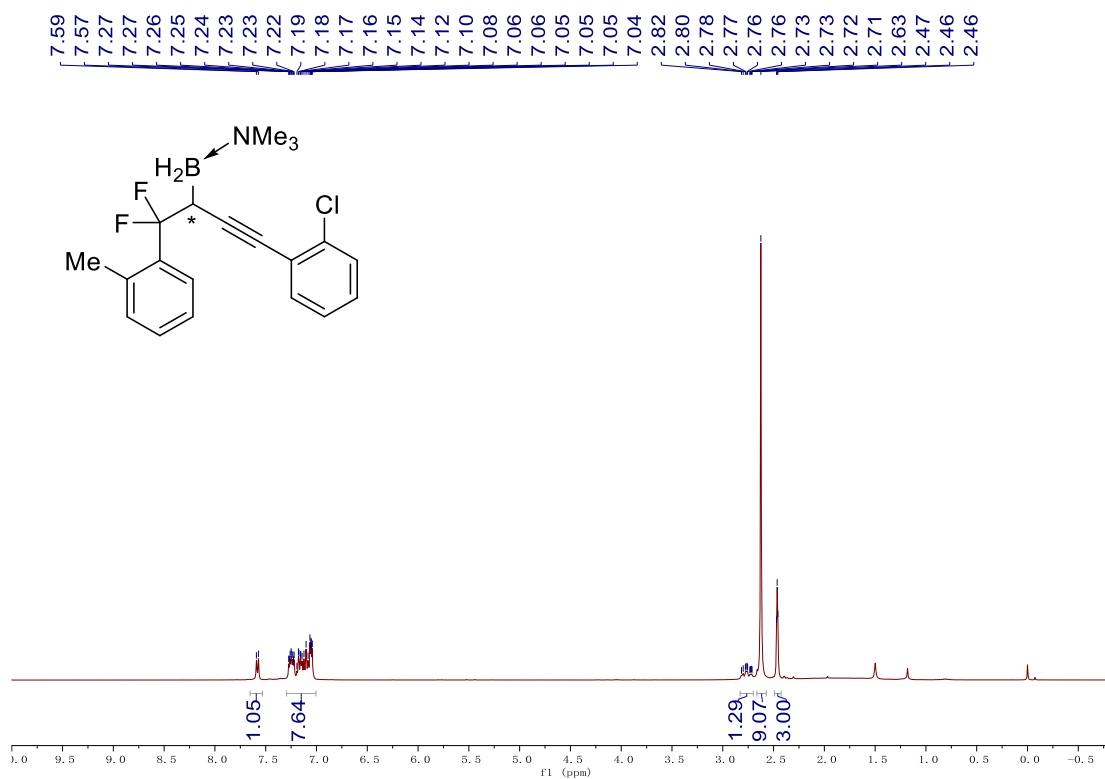

**(+)-Trimethylamine-(4-(2-chlorophenyl)-1,1-difluoro-1-(*o*-tolyl)but-3-yn-2-yl)borane (3ma):  $^{13}\text{C}$  NMR (101 MHz,  $\text{CDCl}_3$ )**

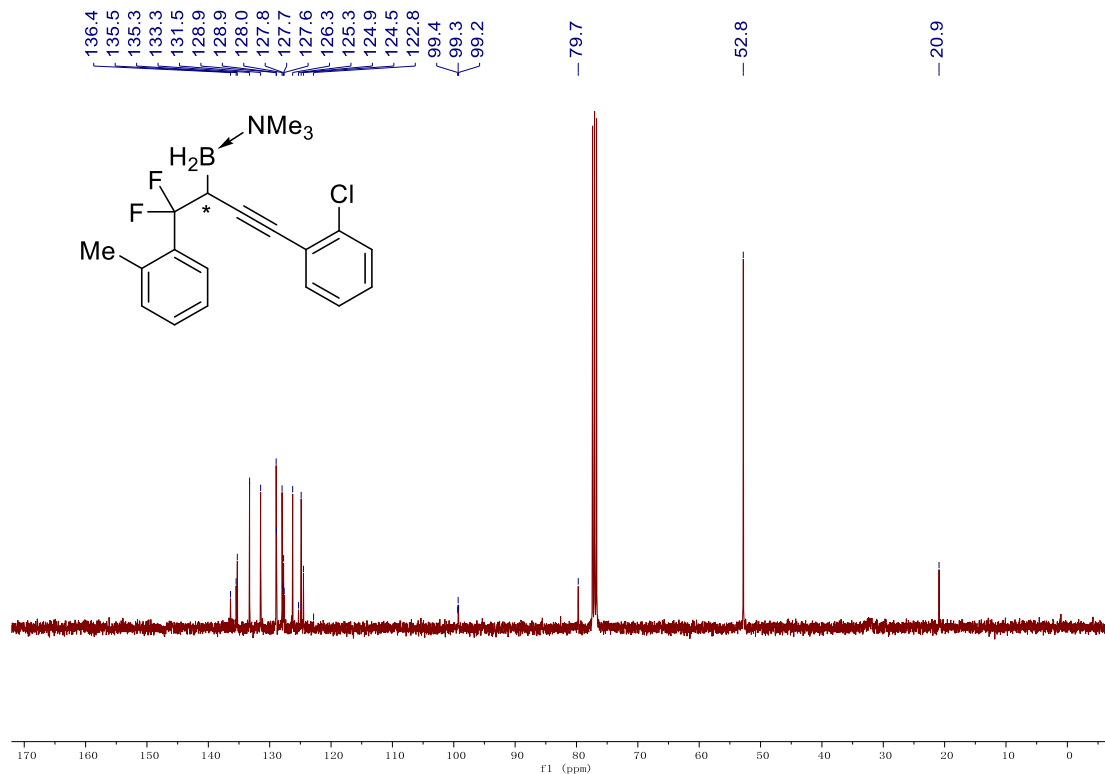

**(+)-Trimethylamine-(4-(2-chlorophenyl)-1,1-difluoro-1-(*o*-tolyl)but-3-yn-2-yl)borane (3ma):  $^{19}\text{F}$  NMR (376 MHz,  $\text{CDCl}_3$ )**

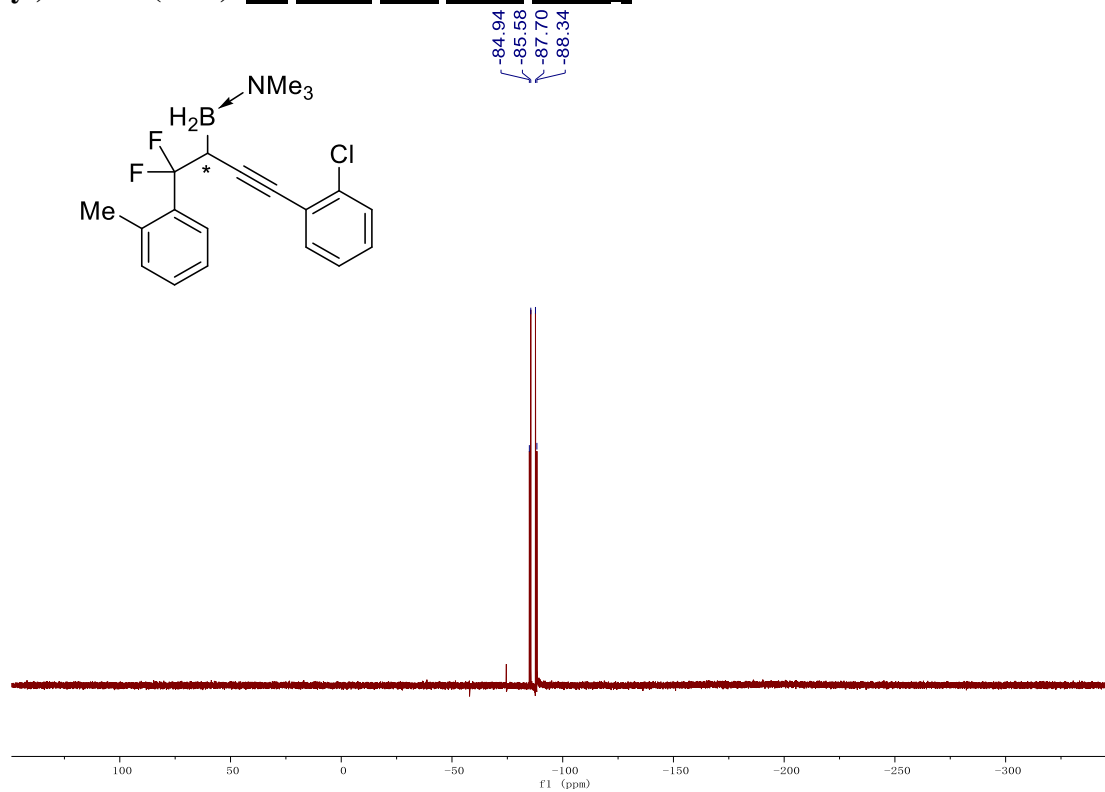

**(+)-Trimethylamine-(4-(3-chlorophenyl)-1,1-difluoro-1-(*o*-tolyl)but-3-yn-2-yl)borane (3na):  $^1\text{H}$  NMR (400 MHz,  $\text{CDCl}_3$ )**

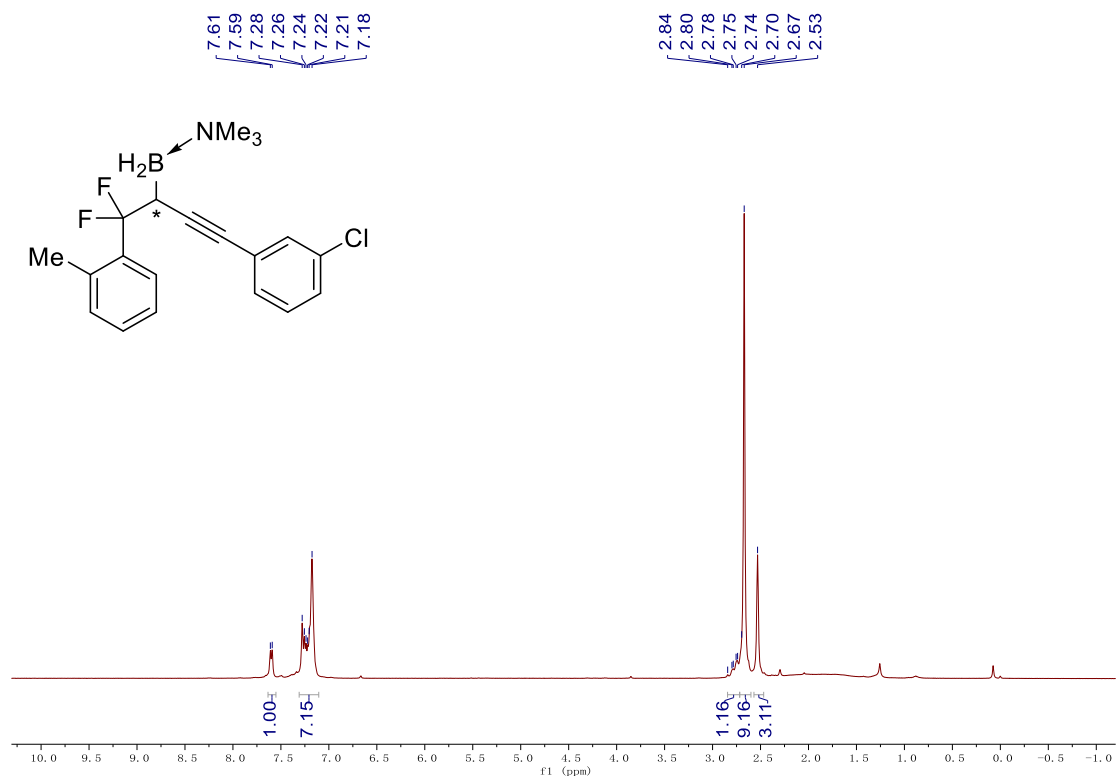

**(+)-Trimethylamine-(4-(3-chlorophenyl)-1,1-difluoro-1-(*o*-tolyl)but-3-yn-2-yl)borane (3na):  $^{13}\text{C}$  NMR (101 MHz,  $\text{CDCl}_3$ )**

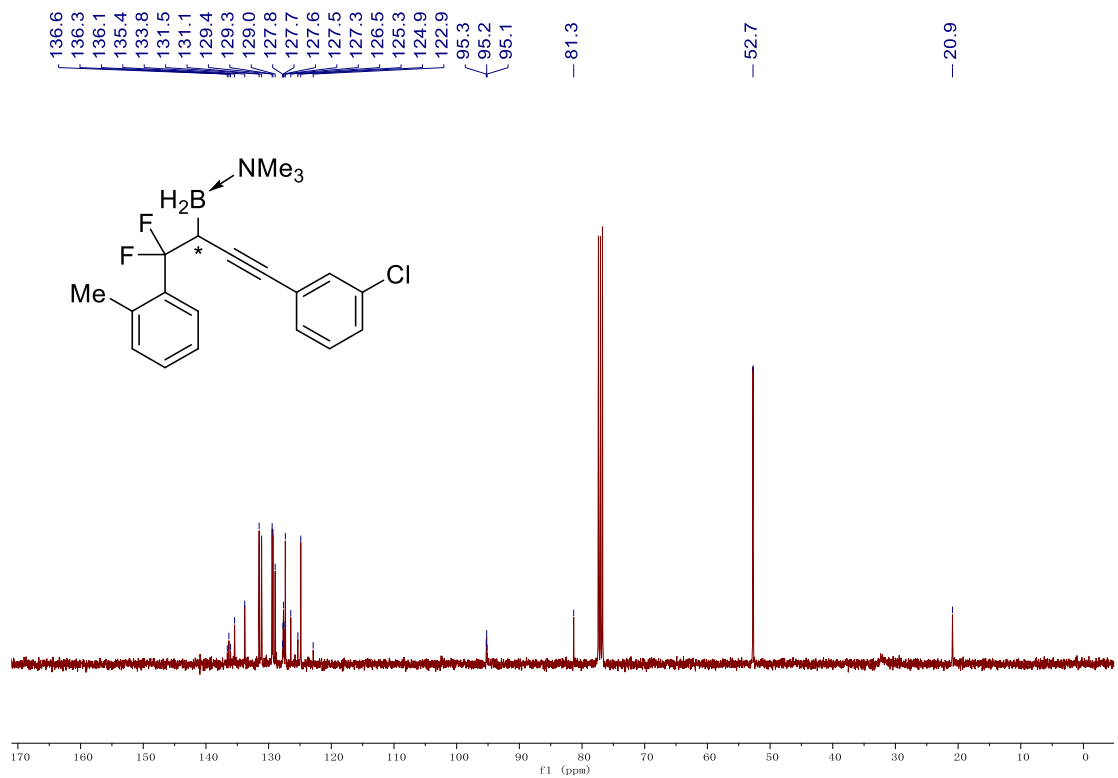

**(+)-Trimethylamine-(4-(3-chlorophenyl)-1,1-difluoro-1-(*o*-tolyl)but-3-yn-2-yl)borane (3na):  $^{19}\text{F}$  NMR (376 MHz,  $\text{CDCl}_3$ )**

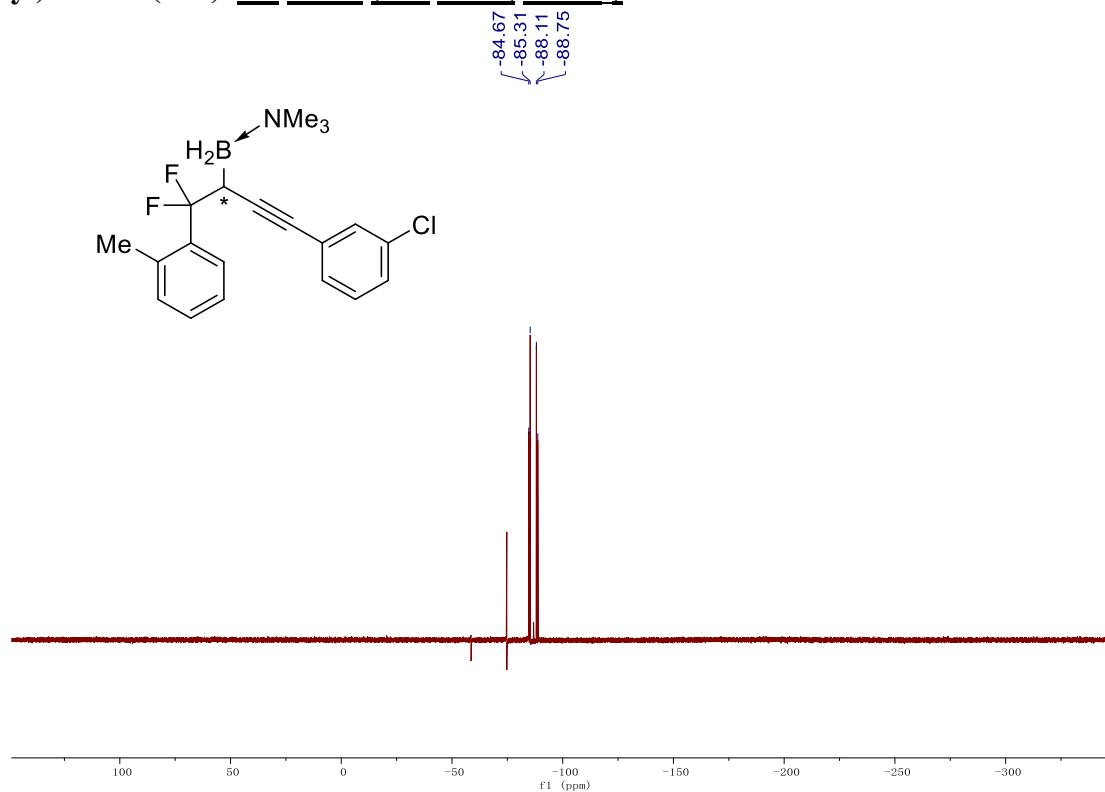

**(+)-Trimethylamine-(4-(4-chlorophenyl)-1,1-difluoro-1-(*o*-tolyl)but-3-yn-2-yl)borane (3oa):  $^1\text{H}$  NMR (400 MHz,  $\text{CDCl}_3$ )**

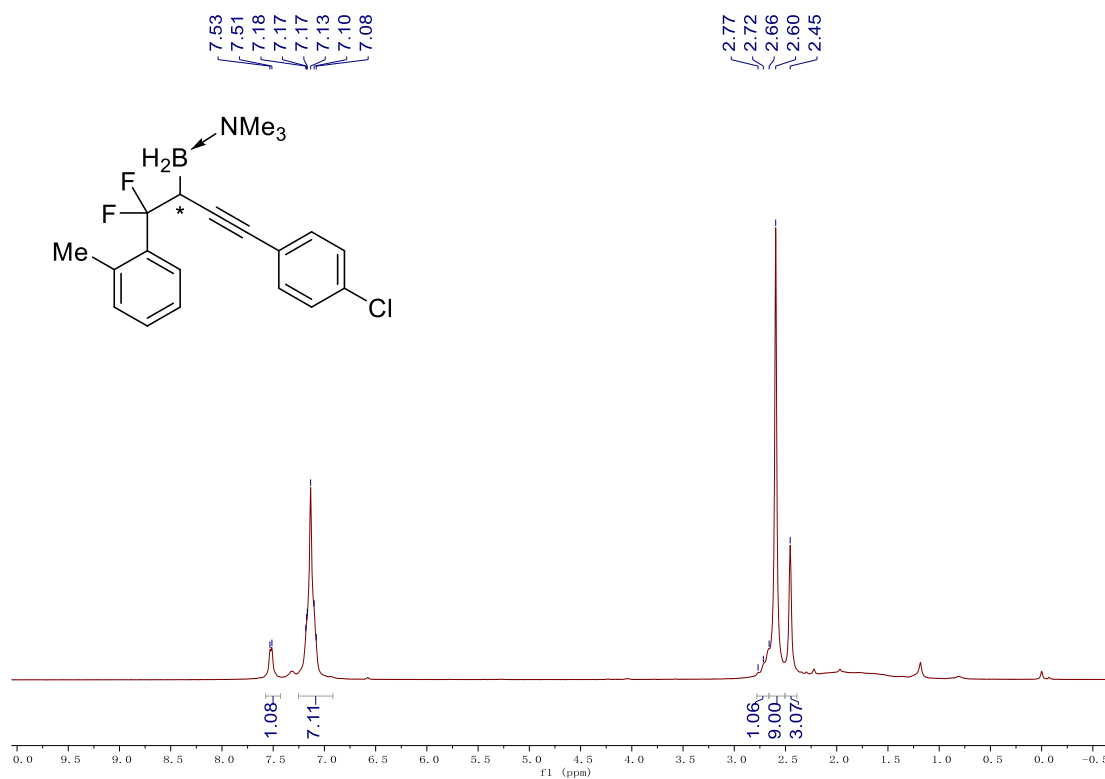

**(+)-Trimethylamine-(4-(4-chlorophenyl)-1,1-difluoro-1-(*o*-tolyl)but-3-yn-2-yl)borane (30a):  $^{13}\text{C}$  NMR (101 MHz,  $\text{CDCl}_3$ )**

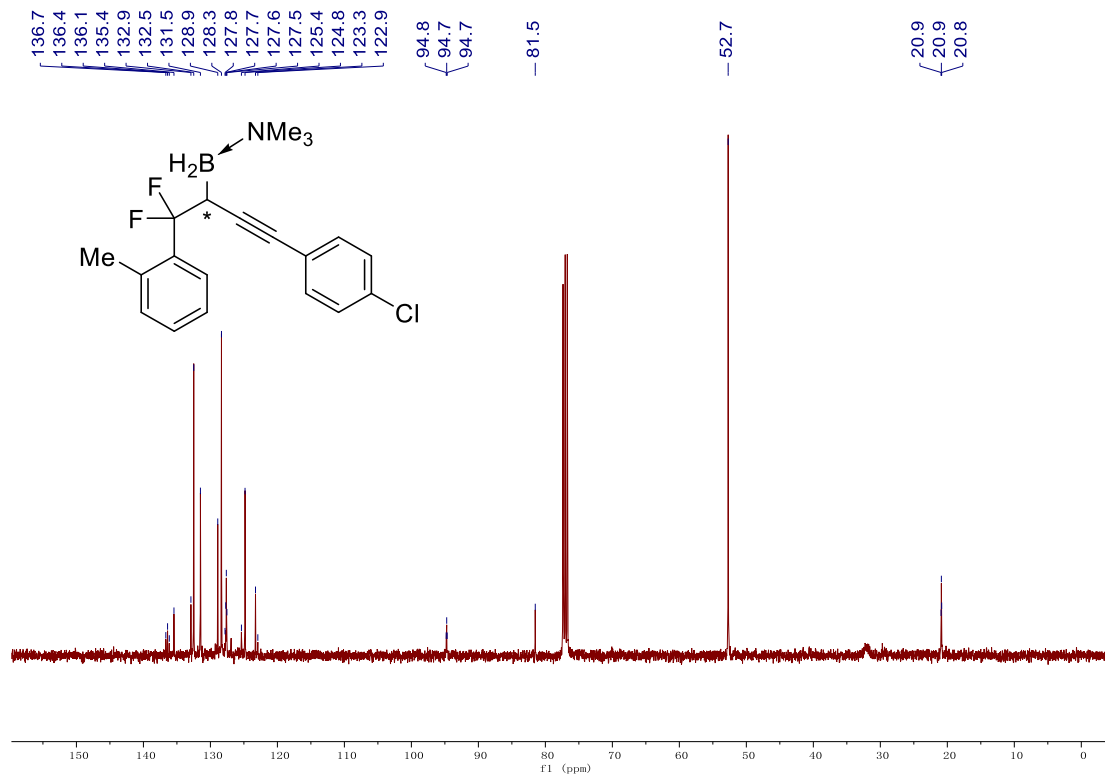

**(+)-Trimethylamine-(4-(4-chlorophenyl)-1,1-difluoro-1-(*o*-tolyl)but-3-yn-2-yl)borane (30a):  $^{19}\text{F}$  NMR (376 MHz,  $\text{CDCl}_3$ )**

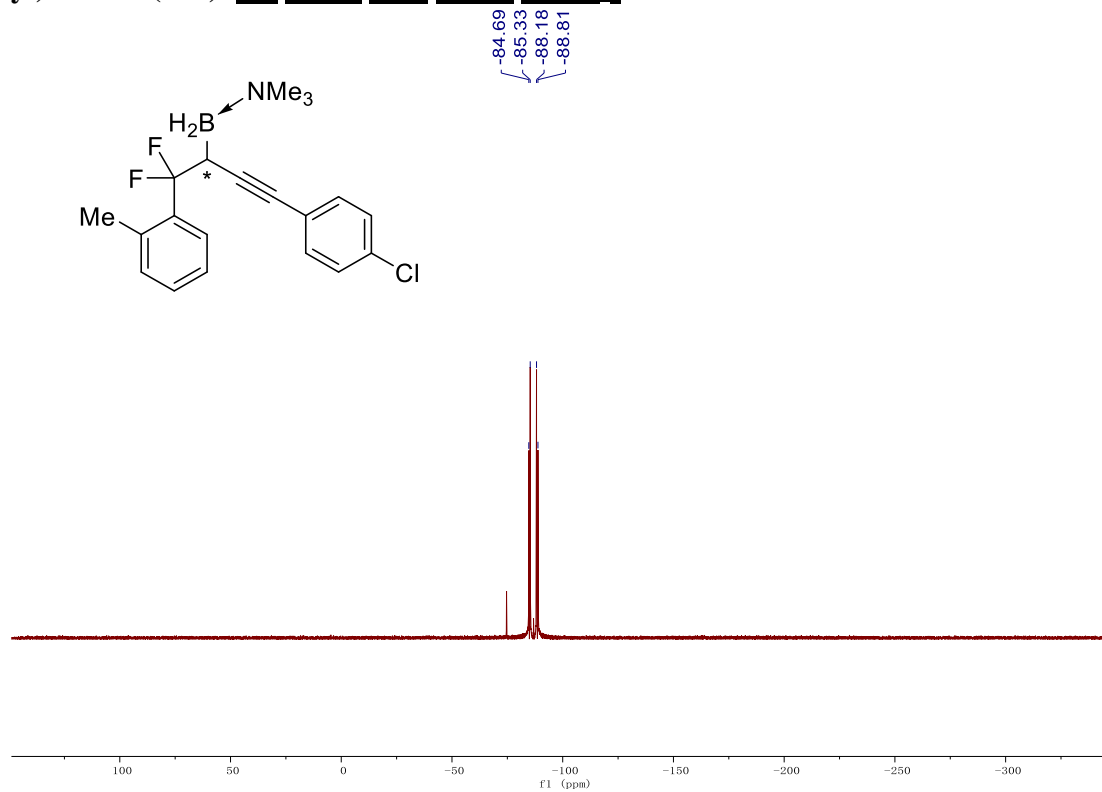

**(+)-Trimethylamine-(1,1-difluoro-4-(3-fluorophenyl)-1-(*o*-tolyl)but-3-yn-2-yl)borane (3pa):  $^1\text{H}$  NMR (400 MHz,  $\text{CDCl}_3$ )**

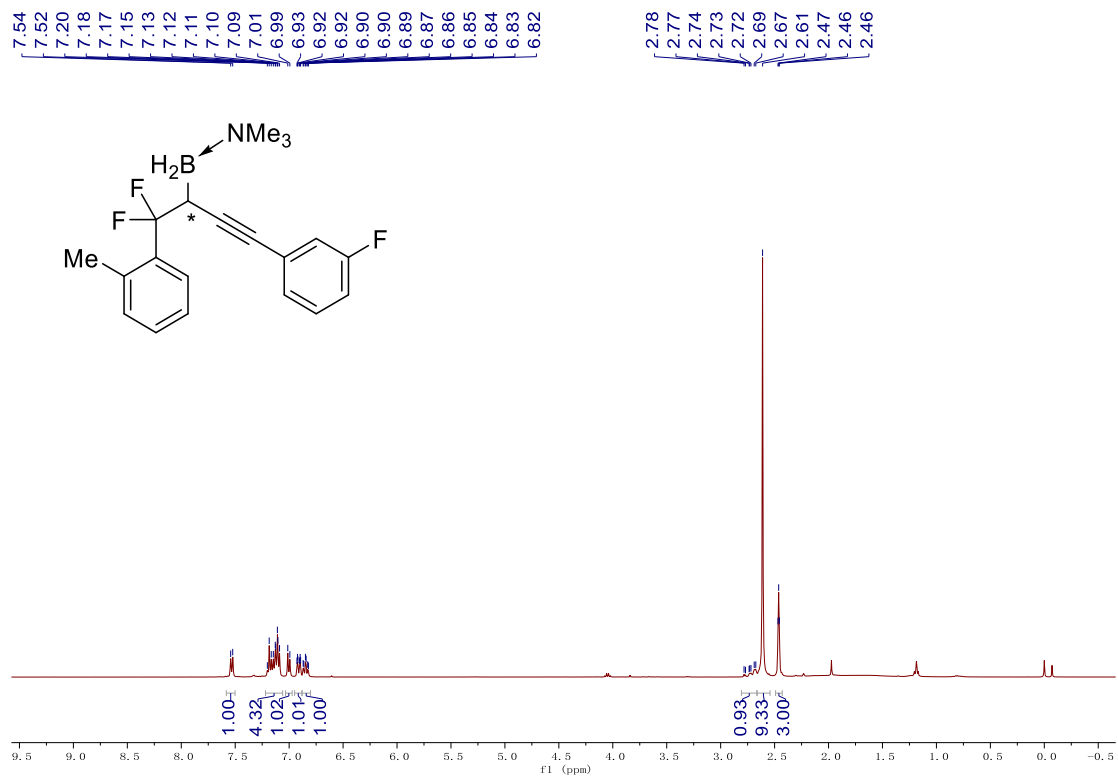

**(+)-Trimethylamine-(1,1-difluoro-4-(3-fluorophenyl)-1-(*o*-tolyl)but-3-yn-2-yl)borane (3pa):  $^{13}\text{C}$  NMR (101 MHz,  $\text{CDCl}_3$ )**

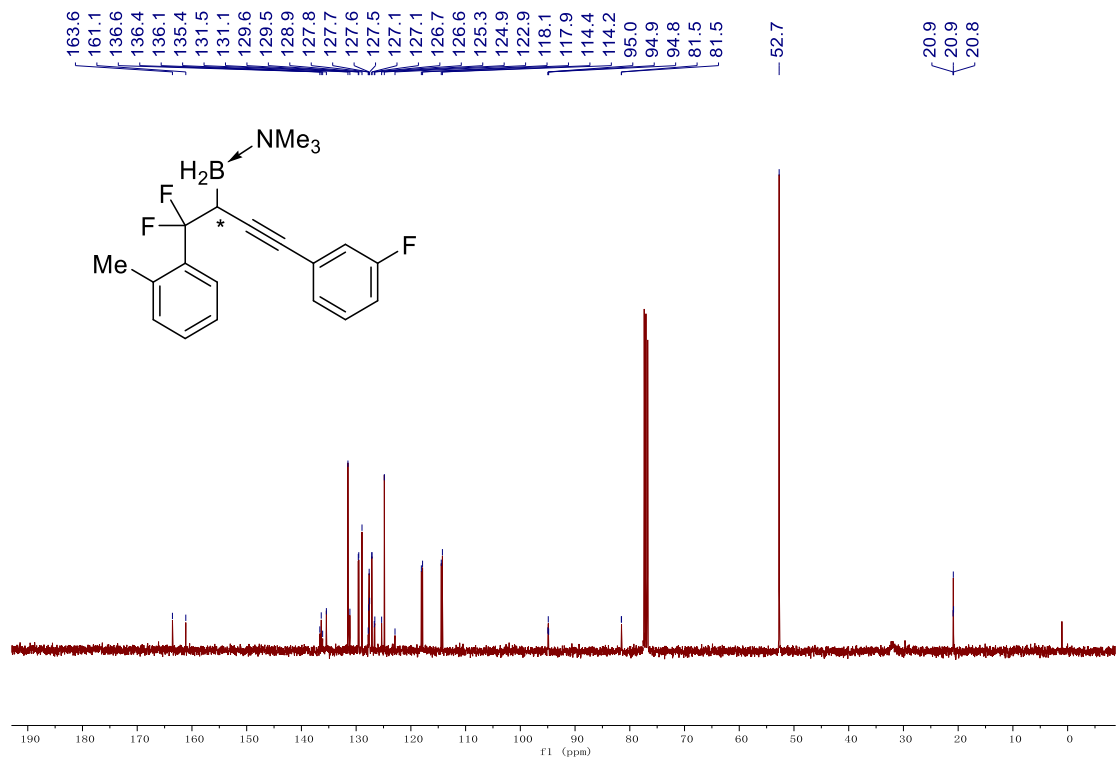

**(+)-Trimethylamine-(1,1-difluoro-4-(3-fluorophenyl)-1-(*o*-tolyl)but-3-yn-2-yl)borane (3pa):  $^{19}\text{F}$  NMR (376 MHz,  $\text{CDCl}_3$ )**

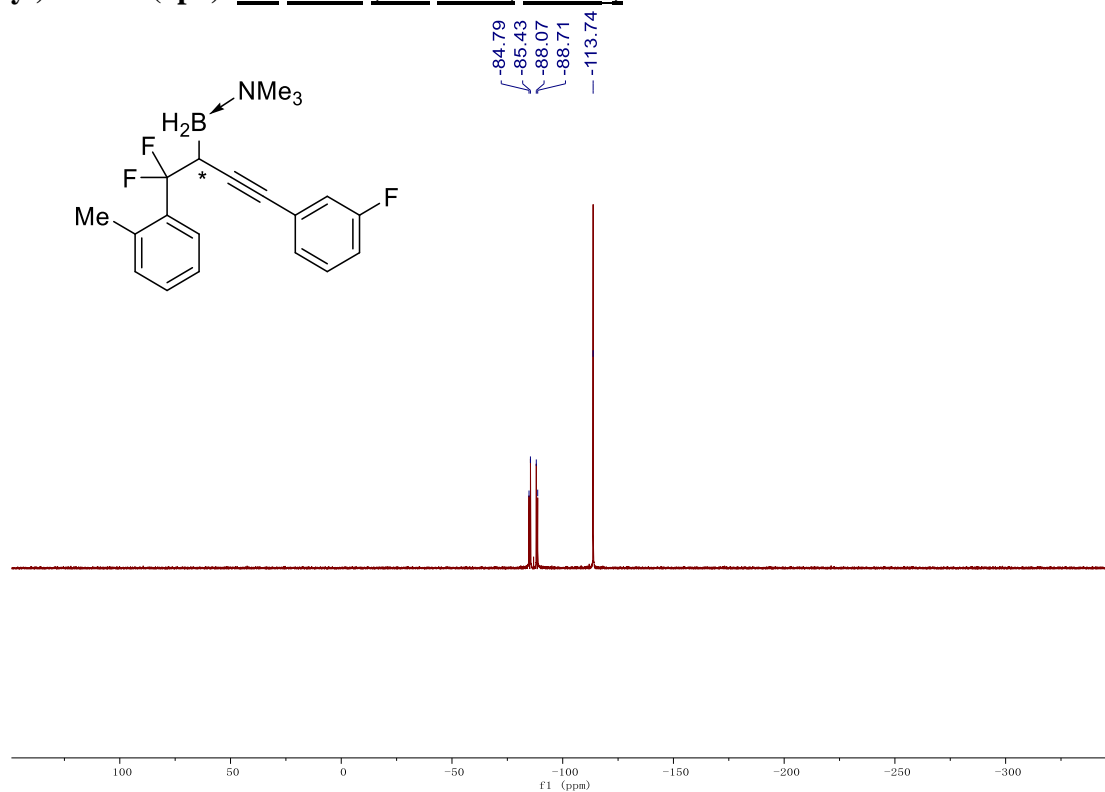

**(+)-Trimethylamine-(1,1-difluoro-1-(*o*-tolyl)-4-(4-(trifluoromethyl)phenyl)but-3-yn-2-yl)borane (3qa):  $^1\text{H}$  NMR (400 MHz,  $\text{CDCl}_3$ )**

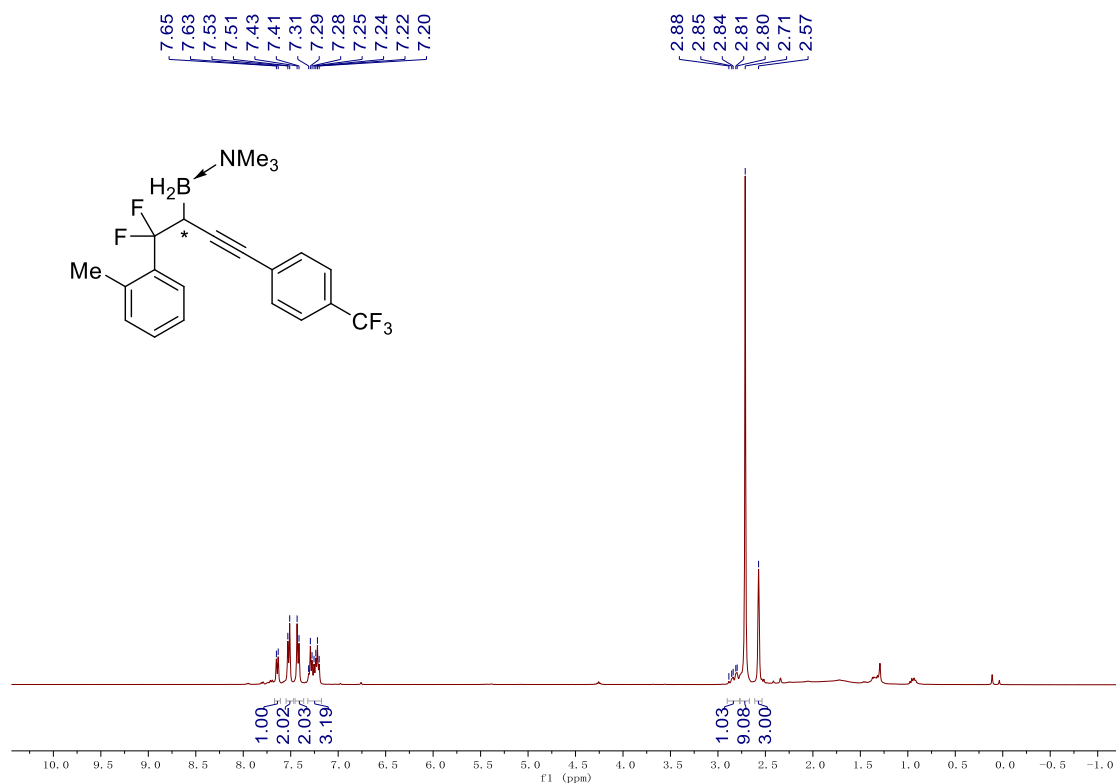

**(+)-Trimethylamine-(1,1-difluoro-1-(*o*-tolyl)-4-(4-(trifluoromethyl)phenyl)but-3-yn-2-yl)borane (3qa):  $^{13}\text{C}$  NMR (101 MHz,  $\text{CDCl}_3$ )**

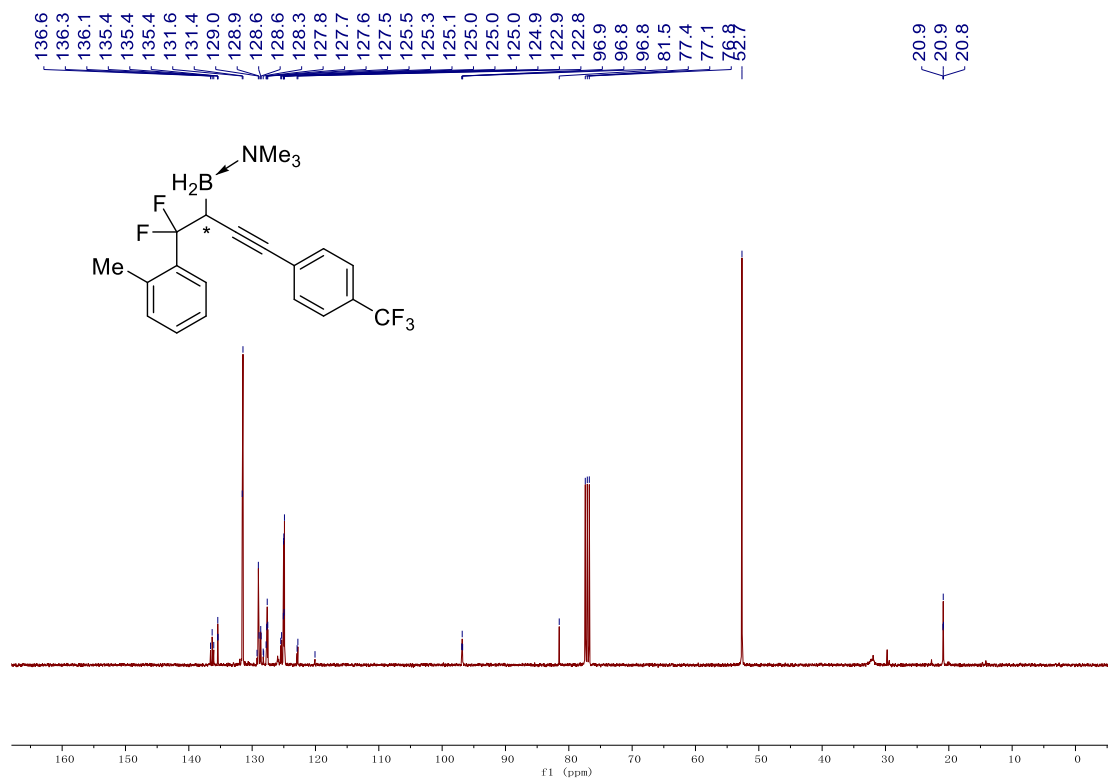

**(+)-Trimethylamine-(1,1-difluoro-1-(*o*-tolyl)-4-(4-(trifluoromethyl)phenyl)but-3-yn-2-yl)borane (3qa):  $^{19}\text{F}$  NMR (376 MHz,  $\text{CDCl}_3$ )**

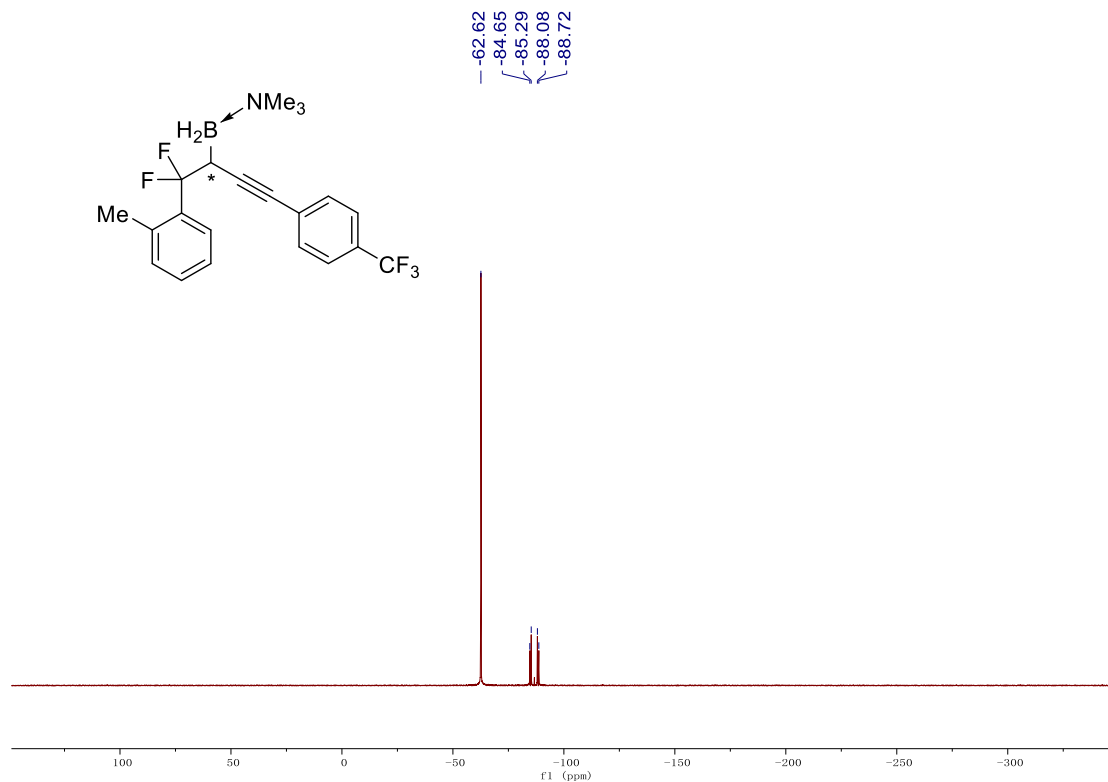



**(-)-Trimethylamine-(1,1-difluoro-4-(naphthalen-1-yl)-1-(*o*-tolyl)but-3-yn-2-yl)borane (3ra):  $^1\text{H}$  NMR (400 MHz,  $\text{CDCl}_3$ )**

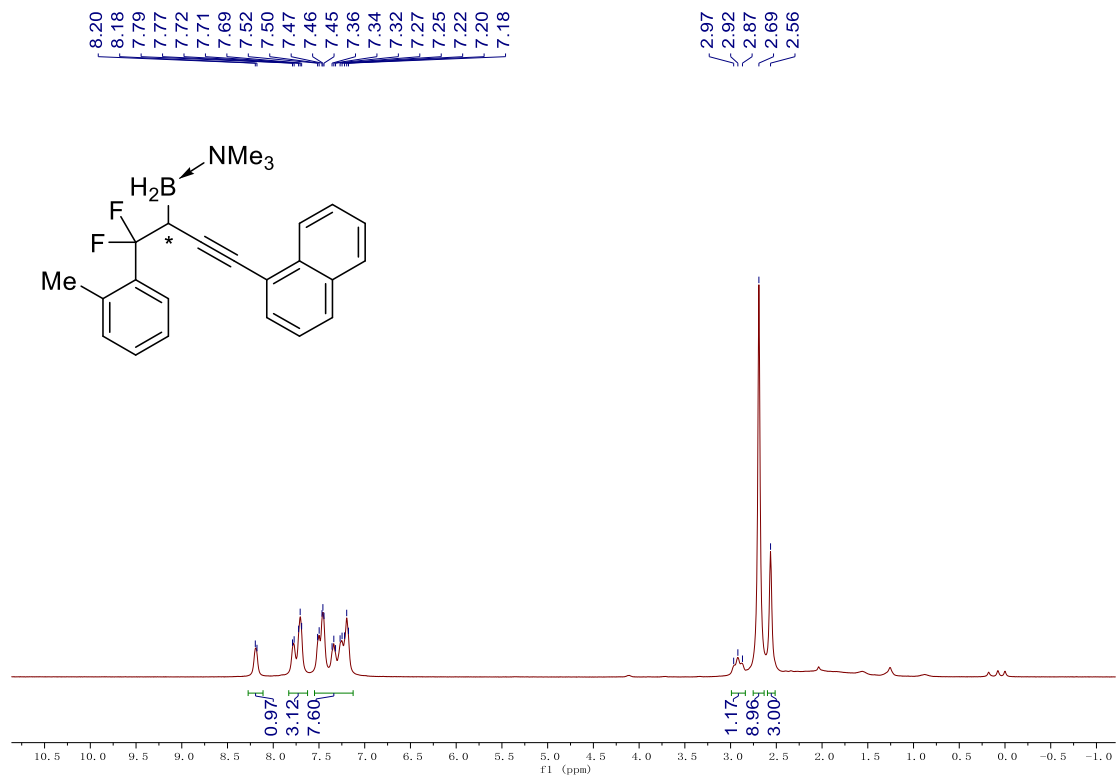

**(-)-Trimethylamine-(1,1-difluoro-4-(naphthalen-1-yl)-1-(*o*-tolyl)but-3-yn-2-yl)borane (3ra):  $^{13}\text{C}$  NMR (101 MHz,  $\text{CDCl}_3$ )**

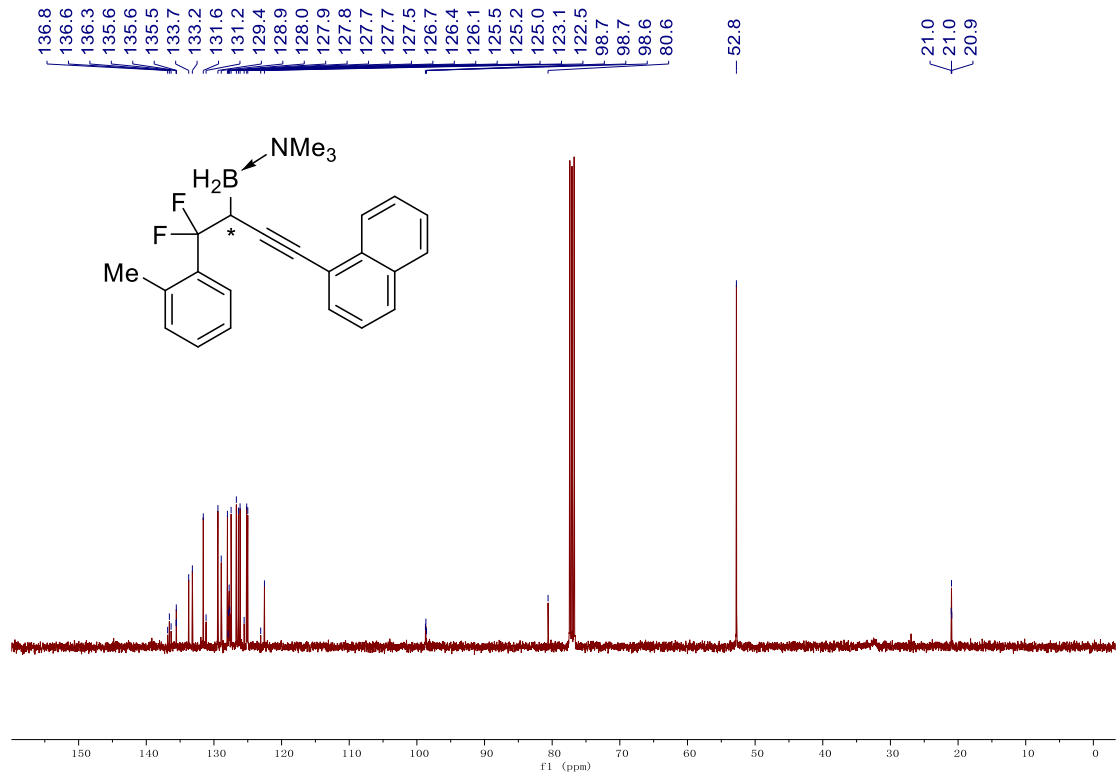

**(-)-Trimethylamine-(1,1-difluoro-4-(naphthalen-1-yl)-1-(*o*-tolyl)but-3-yn-2-yl)borane (3ra):  $^{19}\text{F}$  NMR (376 MHz,  $\text{CDCl}_3$ )**

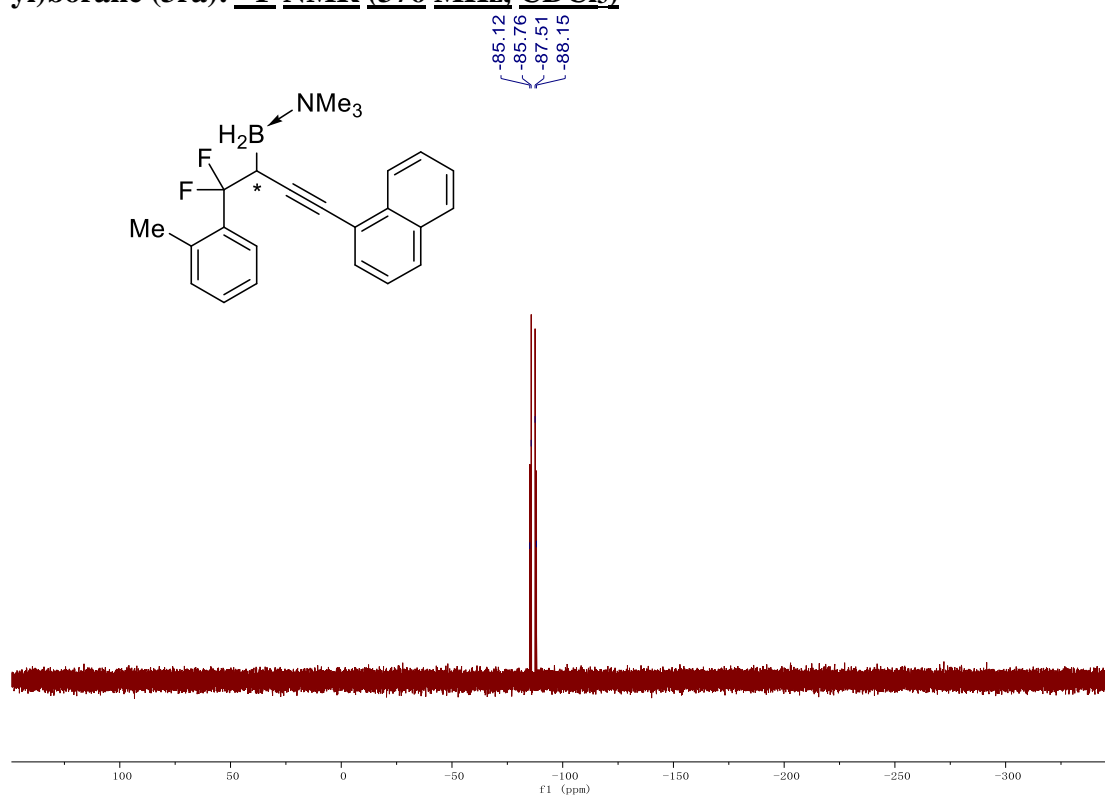

**(+)-Trimethylamine-(1,1-difluoro-4-(thiophen-2-yl)-1-(*o*-tolyl)but-3-yn-2-yl)borane (3sa):  $^1\text{H}$  NMR (400 MHz,  $\text{CDCl}_3$ )**

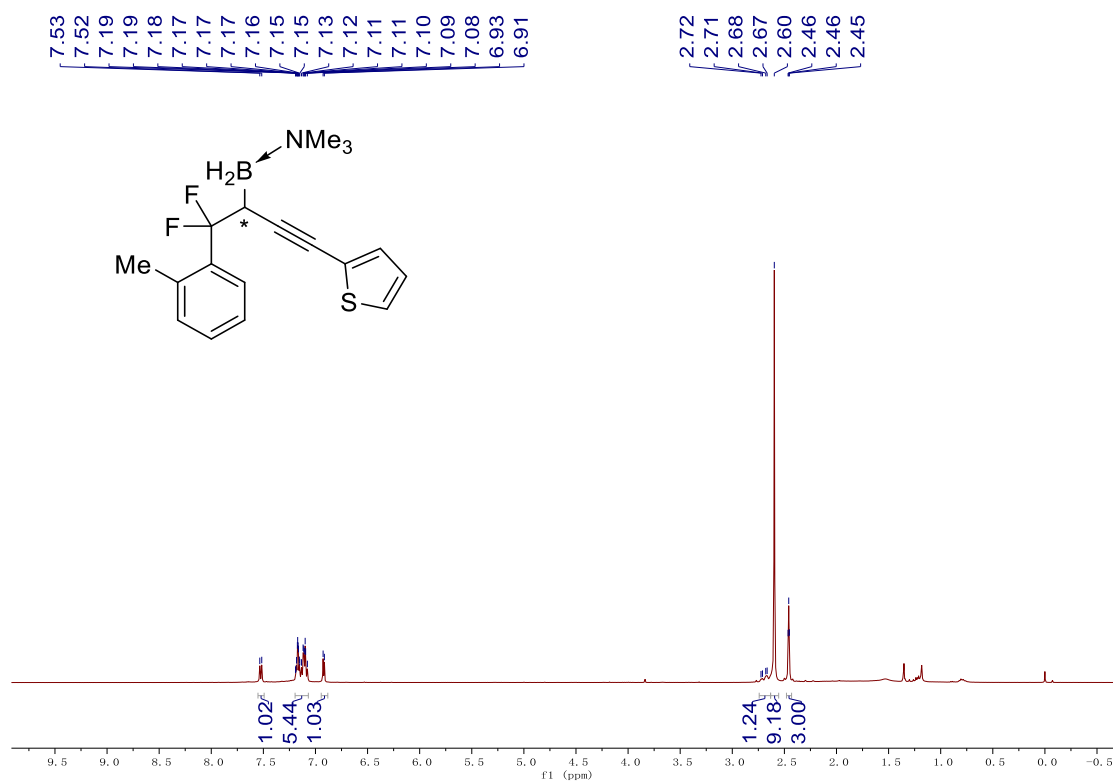

**(+)-Trimethylamine-(1,1-difluoro-4-(thiophen-2-yl)-1-(*o*-tolyl)but-3-yn-2-yl)borane (3sa):  $^{13}\text{C}$  NMR (101 MHz,  $\text{CDCl}_3$ )**

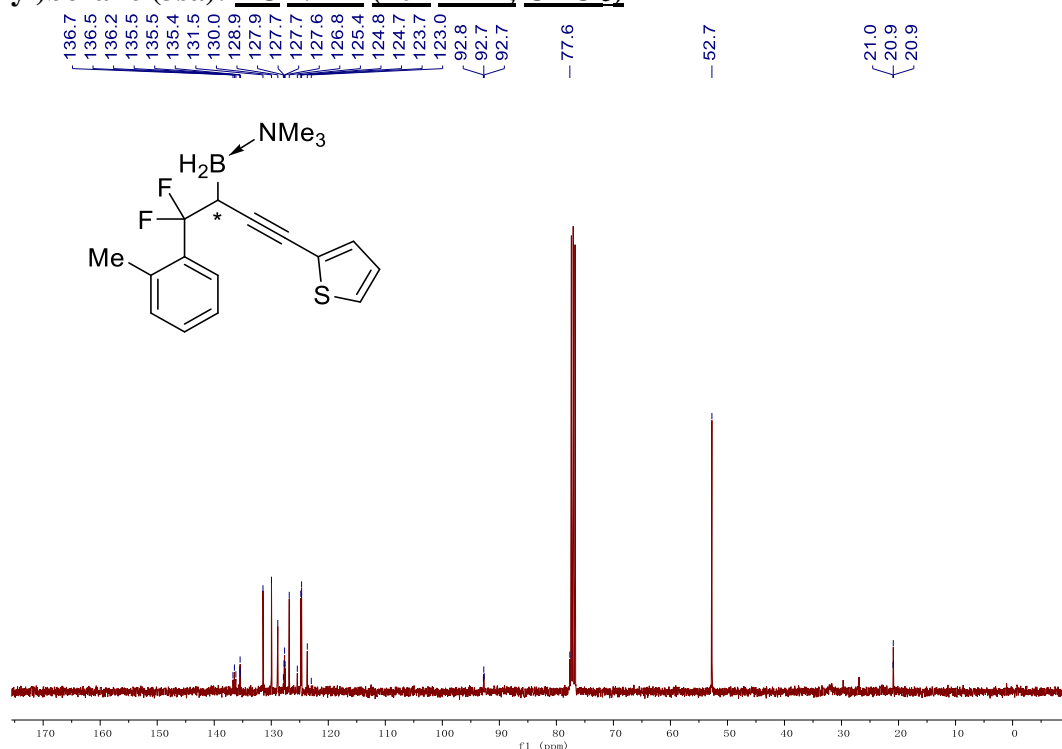

**(+)-Trimethylamine-(1,1-difluoro-4-(thiophen-2-yl)-1-(*o*-tolyl)but-3-yn-2-yl)borane (3sa):  $^{19}\text{F}$  NMR (376 MHz,  $\text{CDCl}_3$ )**

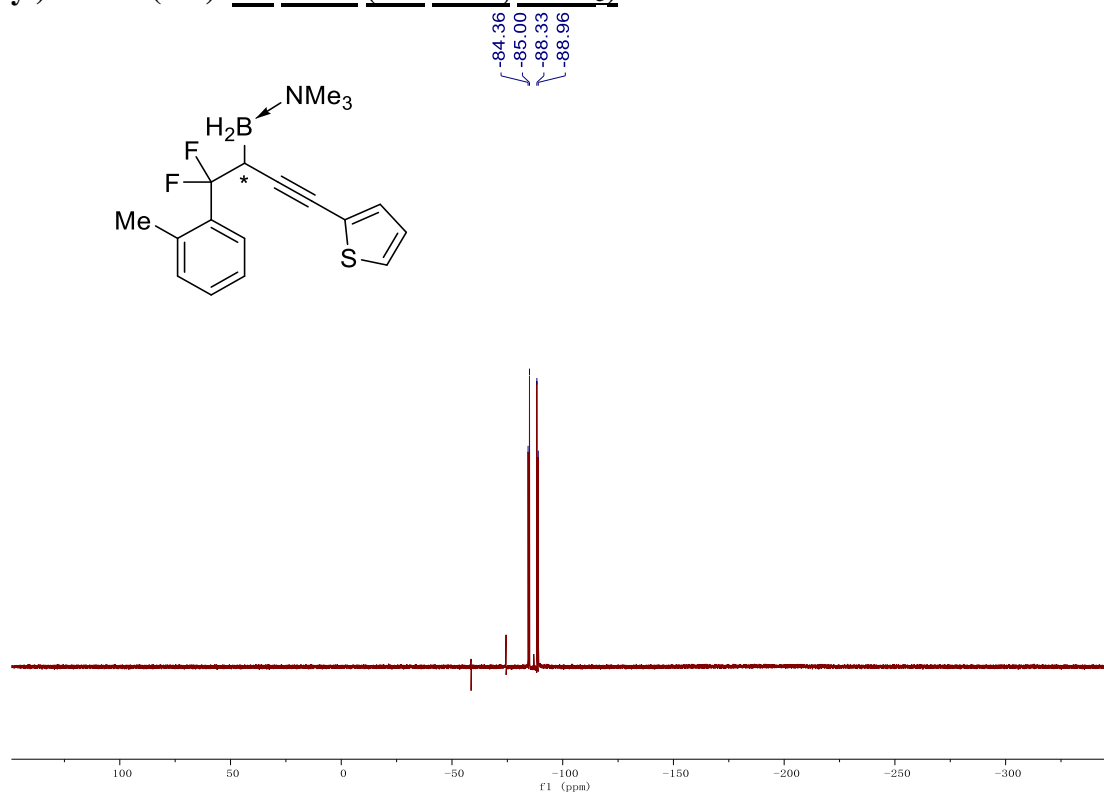

**(-)-Trimethylamine-(4,4-difluoro-1-(naphthalen-1-yl)pent-1-yn-3-yl) borane**  
**(3ta):  $^1\text{H NMR}$  (400 MHz,  $\text{CDCl}_3$ )**

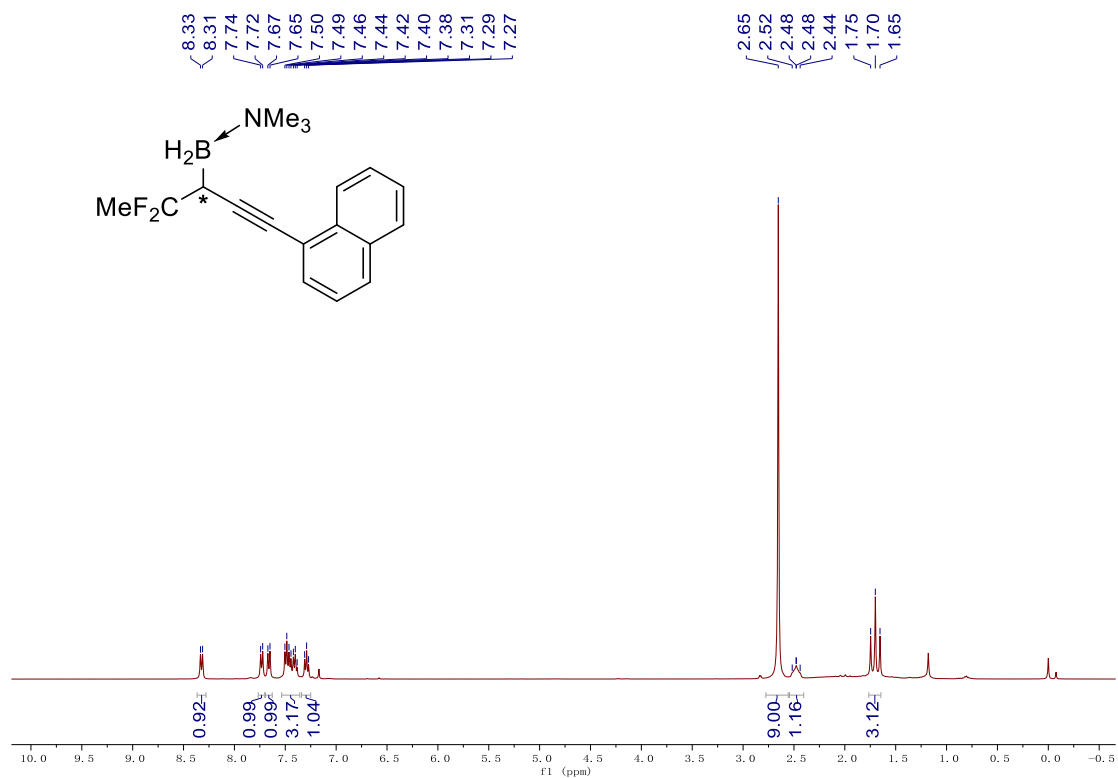

**(-)-Trimethylamine-(4,4-difluoro-1-(naphthalen-1-yl)pent-1-yn-3-yl) borane**  
**(3ta):  $^{13}\text{C NMR}$  (101 MHz,  $\text{CDCl}_3$ )**

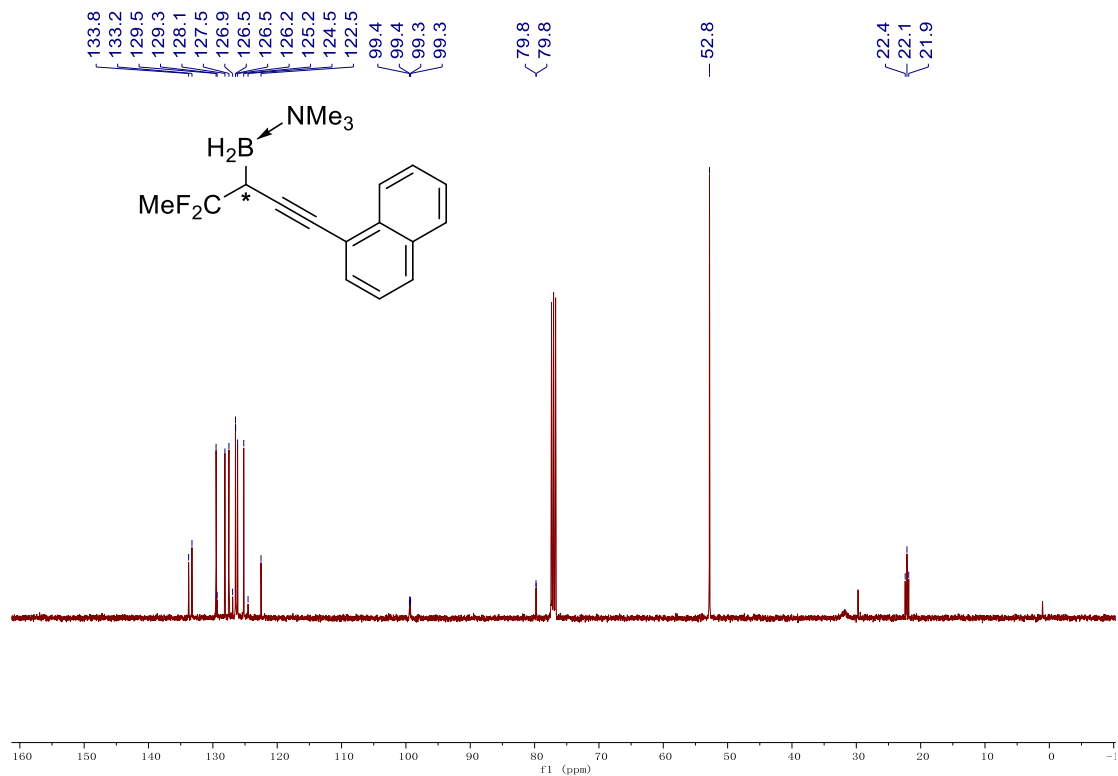

**(-)-Trimethylamine-(4,4-difluoro-1-(naphthalen-1-yl)pent-1-yn-3-yl) borane**

**(3ta):  $^{19}\text{F}$  NMR (376 MHz,  $\text{CDCl}_3$ )**

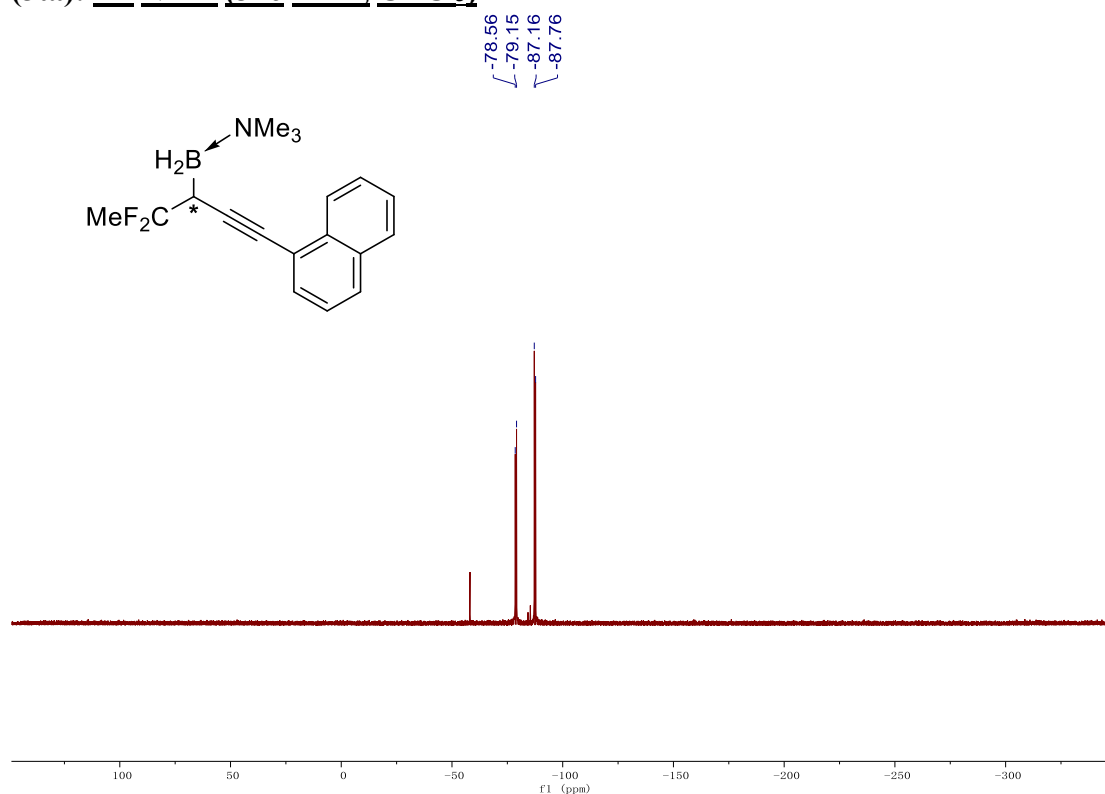

**(-)-(*S*)-5,5-difluoro-2-phenyl-5-(*o*-tolyl)penta-2,3-dien-1-ol (5a):  $^1\text{H}$  NMR (400 MHz,  $\text{CDCl}_3$ )**

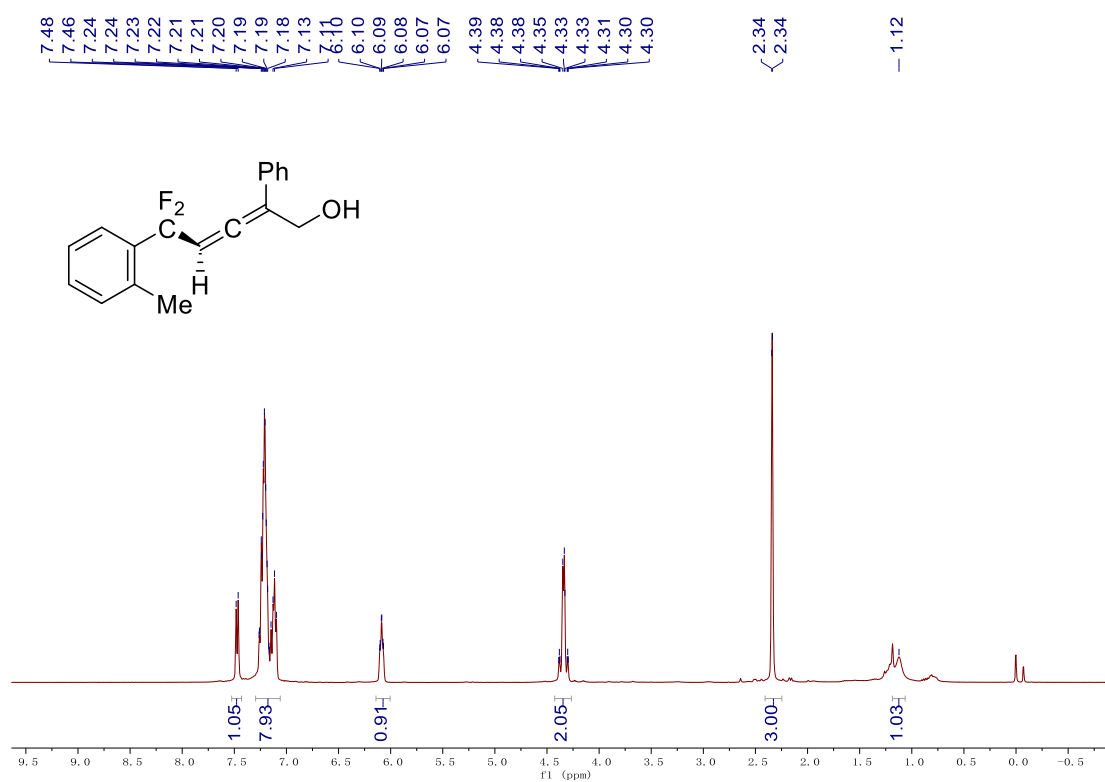

**(-)-(S)-5,5-difluoro-2-phenyl-5-(*o*-tolyl)penta-2,3-dien-1-ol (5a): <sup>13</sup>C NMR (101 MHz, CDCl<sub>3</sub>)**

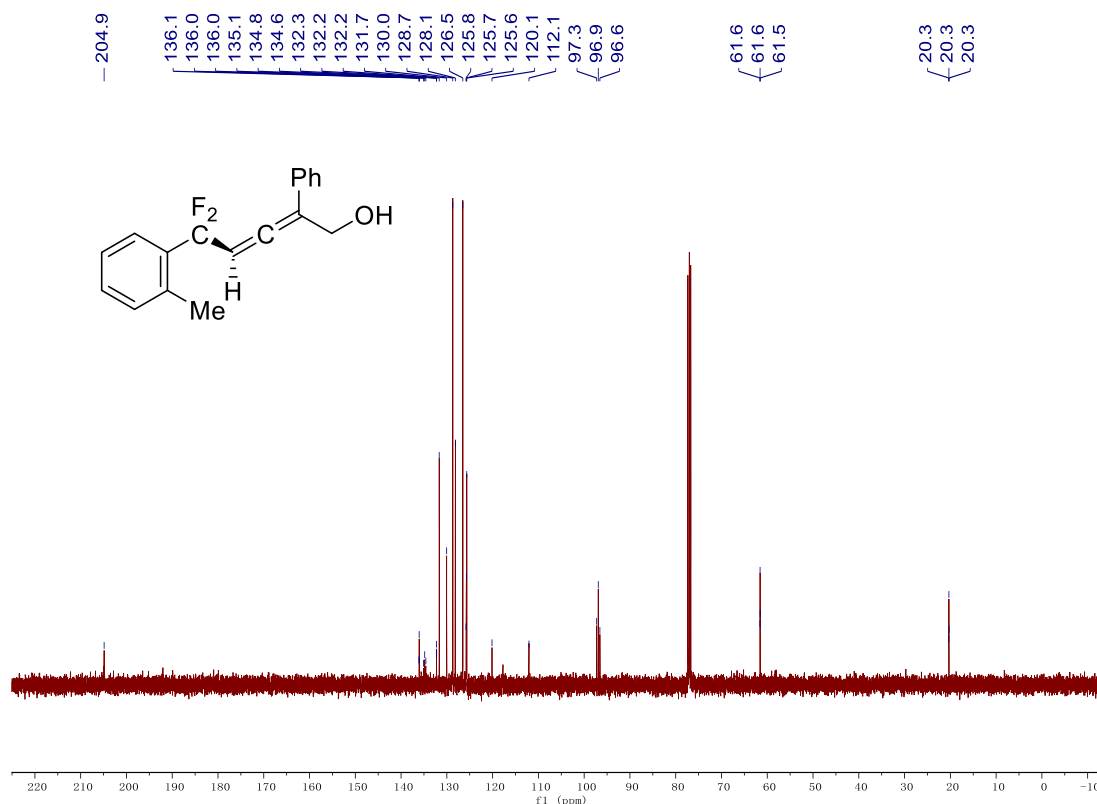

**(-)-(S)-5,5-difluoro-2-phenyl-5-(*o*-tolyl)penta-2,3-dien-1-ol (5a): <sup>19</sup>F NMR (376 MHz, CDCl<sub>3</sub>)**

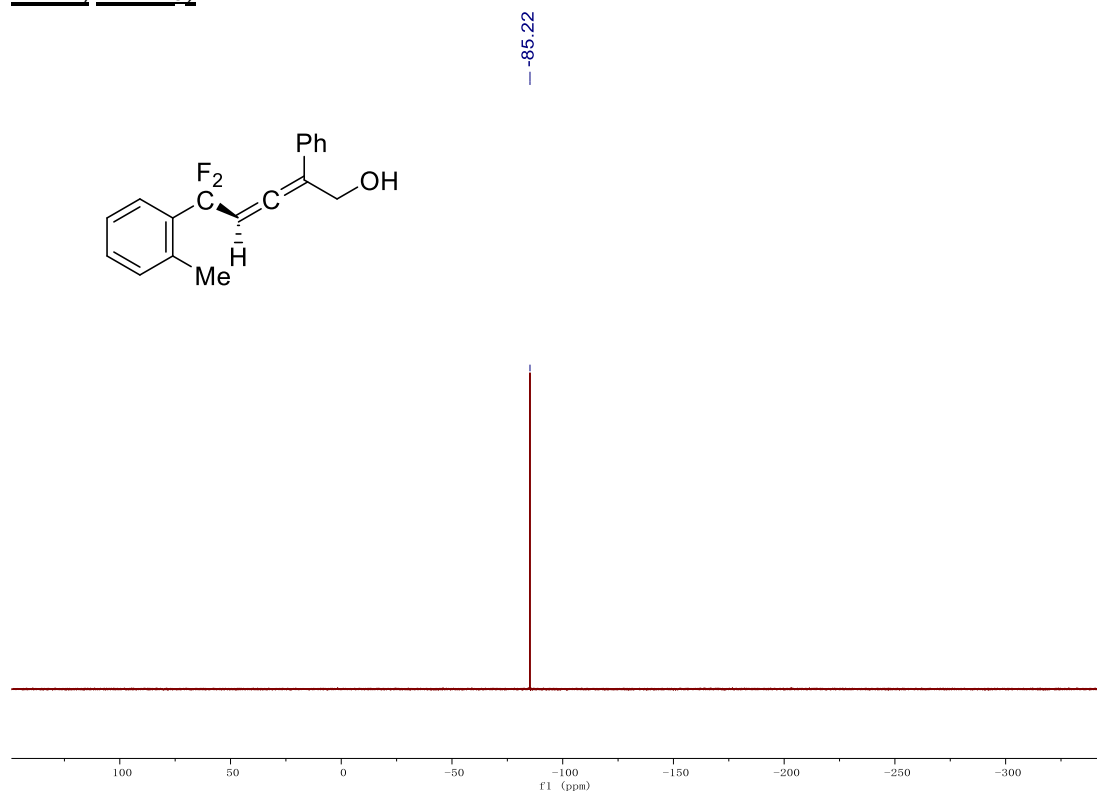

**(-)-(1R,3S)-1-([1,1'-biphenyl]-4-yl)-5,5-difluoro-2-phenyl-5-(*o*-tolyl)penta-2,3-dien-1-ol (5b):  $^1\text{H NMR}$  (400 MHz,  $\text{CDCl}_3$ )**

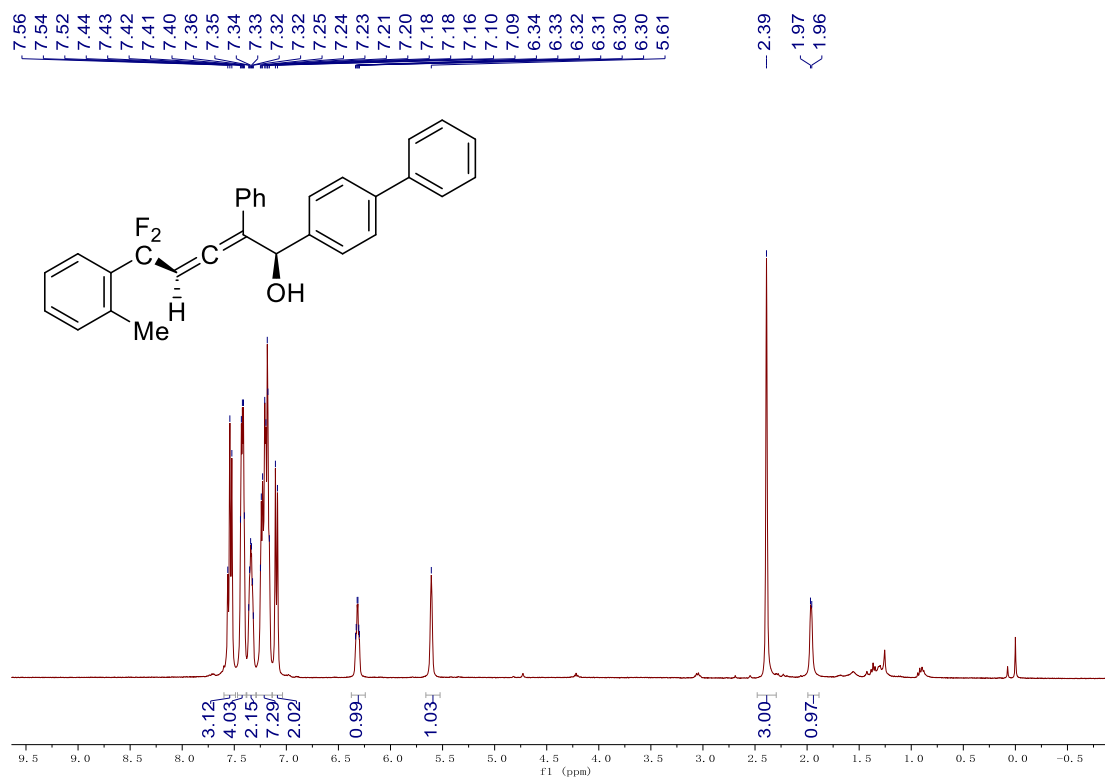

**(-)-(1R,3S)-1-([1,1'-biphenyl]-4-yl)-5,5-difluoro-2-phenyl-5-(*o*-tolyl)penta-2,3-dien-1-ol (5b):  $^{13}\text{C NMR}$  (101 MHz,  $\text{CDCl}_3$ )**

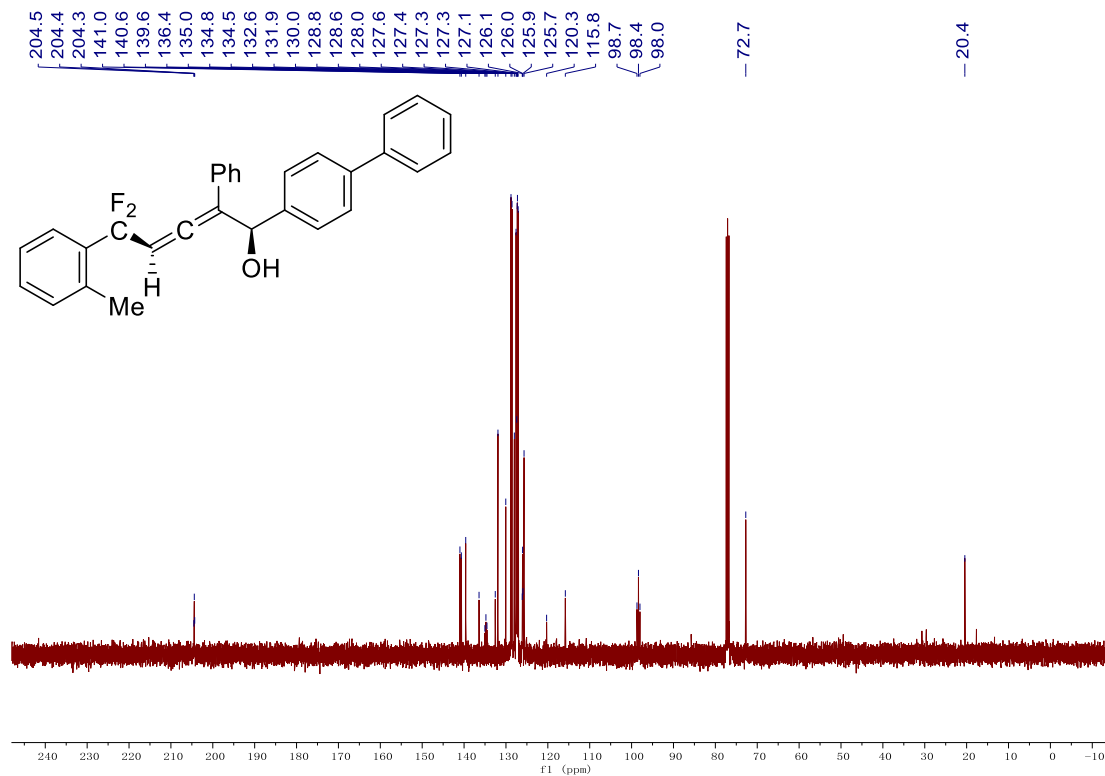

**(-)-(1R,3S)-1-([1,1'-biphenyl]-4-yl)-5,5-difluoro-2-phenyl-5-(*o*-tolyl)penta-2,3-dien-1-ol (5b): <sup>19</sup>F NMR (376 MHz, CDCl<sub>3</sub>)**

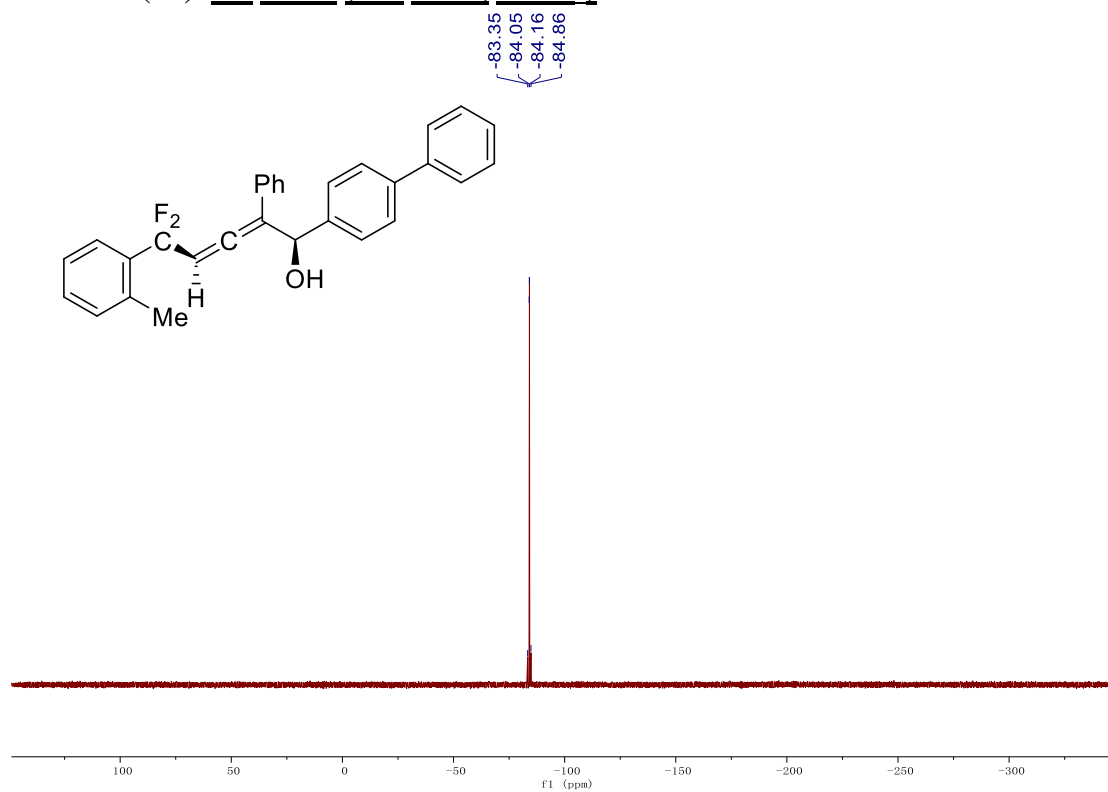

**(-)-(1R,3S)-1-(4-chlorophenyl)-5,5-difluoro-2-phenyl-5-(*o*-tolyl)penta-2,3-dien-1-ol (5c): <sup>1</sup>H NMR (400 MHz, CDCl<sub>3</sub>)**

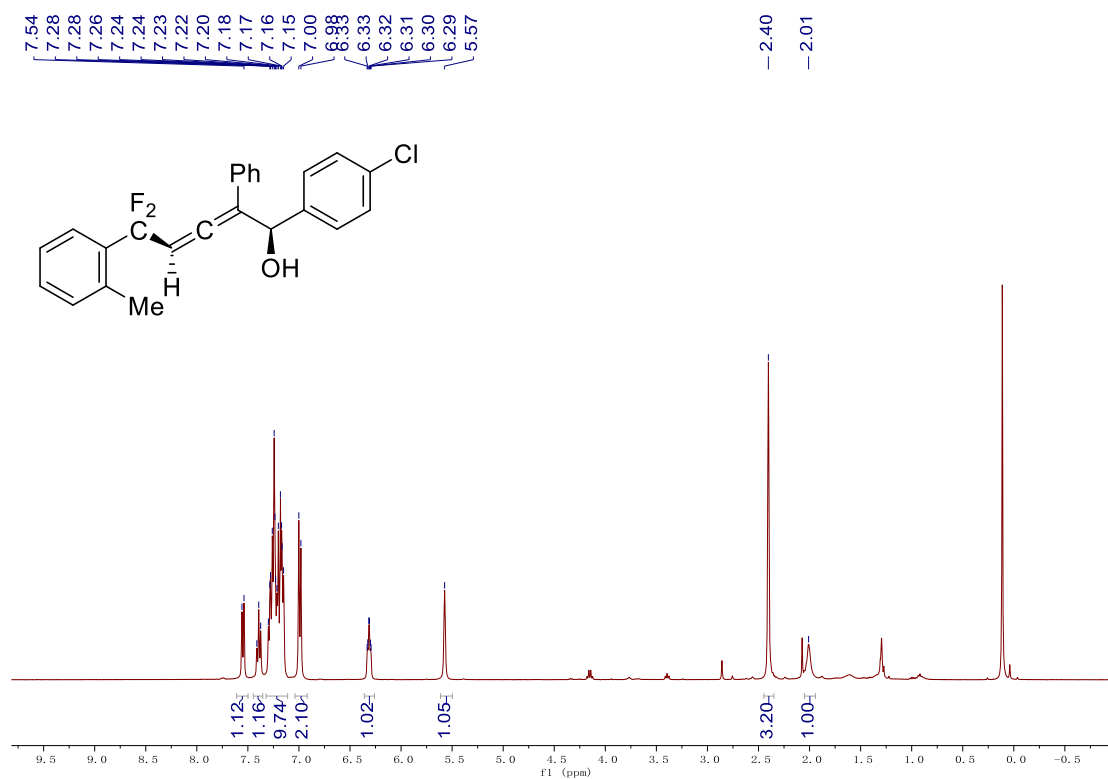



**(-)-(1R,3S)-1-(4-chlorophenyl)-5,5-difluoro-2-phenyl-5-(*o*-tolyl)penta-2,3-dien-1-ol (5c):  $^{13}\text{C}$  NMR (101 MHz,  $\text{CDCl}_3$ )**

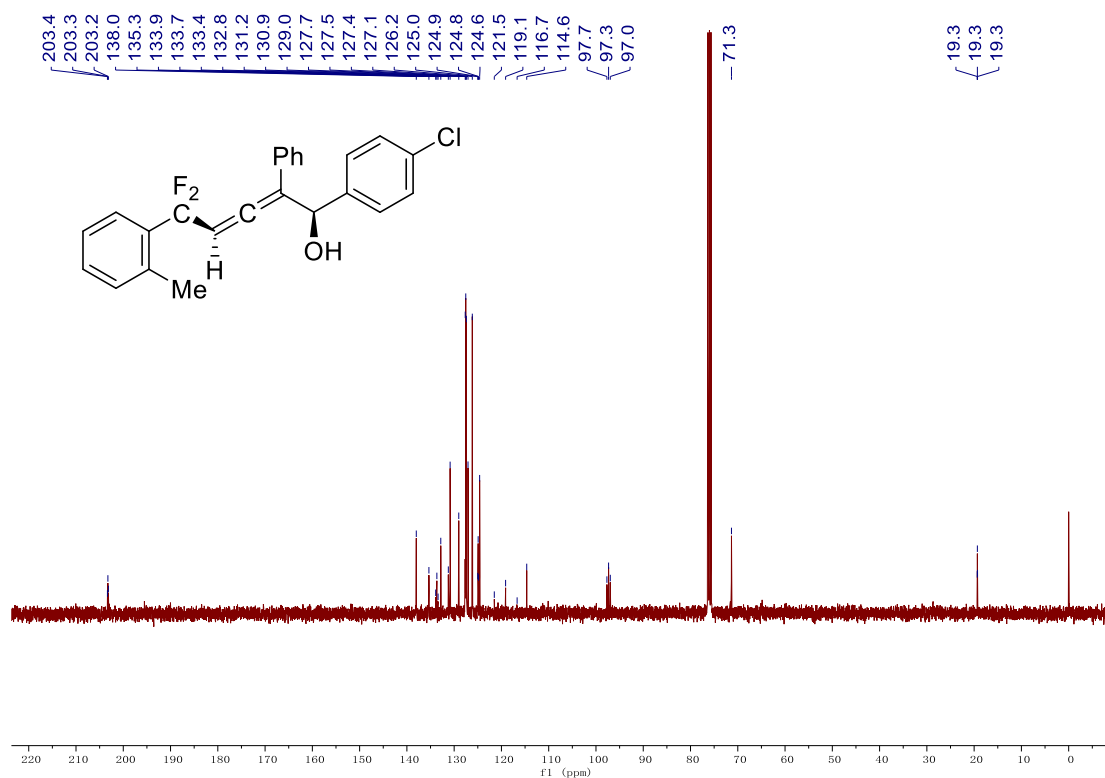

**(-)-(1R,3S)-1-(4-chlorophenyl)-5,5-difluoro-2-phenyl-5-(*o*-tolyl)penta-2,3-dien-1-ol (5c):  $^{19}\text{F}$  NMR (376 MHz,  $\text{CDCl}_3$ )**

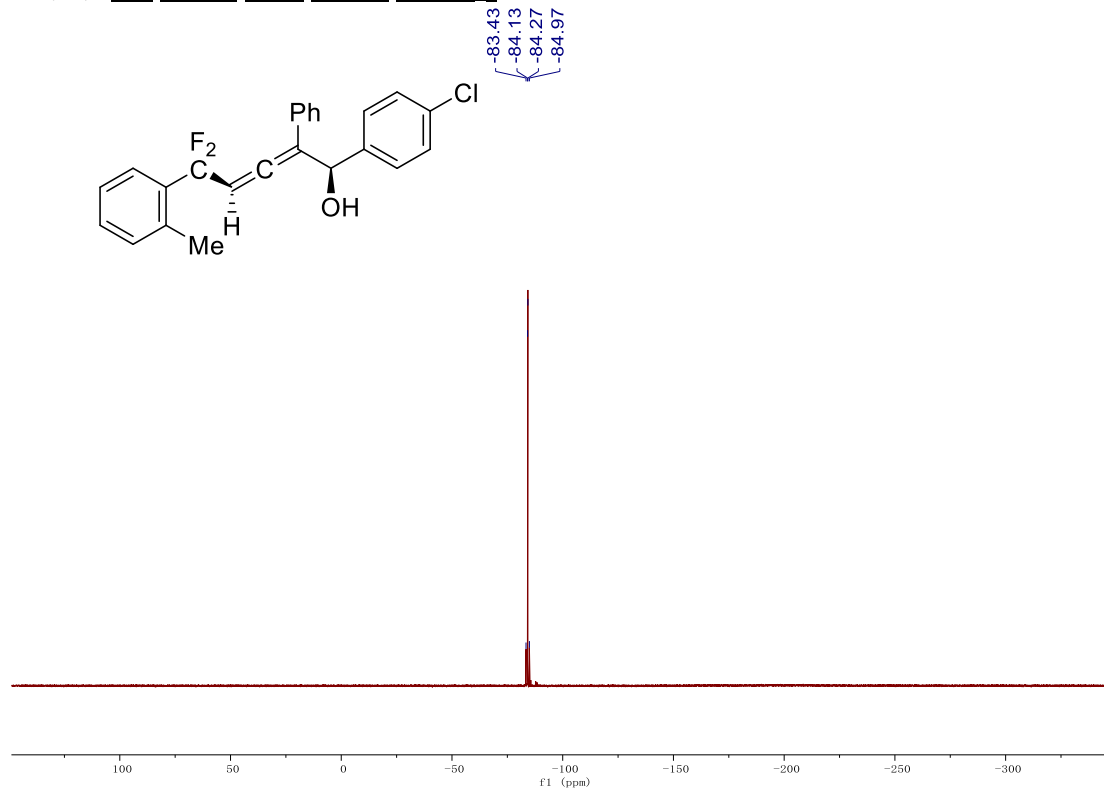

**(-)-(1R,3S)-1-(4-bromophenyl)-5,5-difluoro-2-phenyl-5-(*o*-tolyl)penta-2,3-dien-1-ol (5d): <sup>1</sup>H NMR (400 MHz, CDCl<sub>3</sub>)**

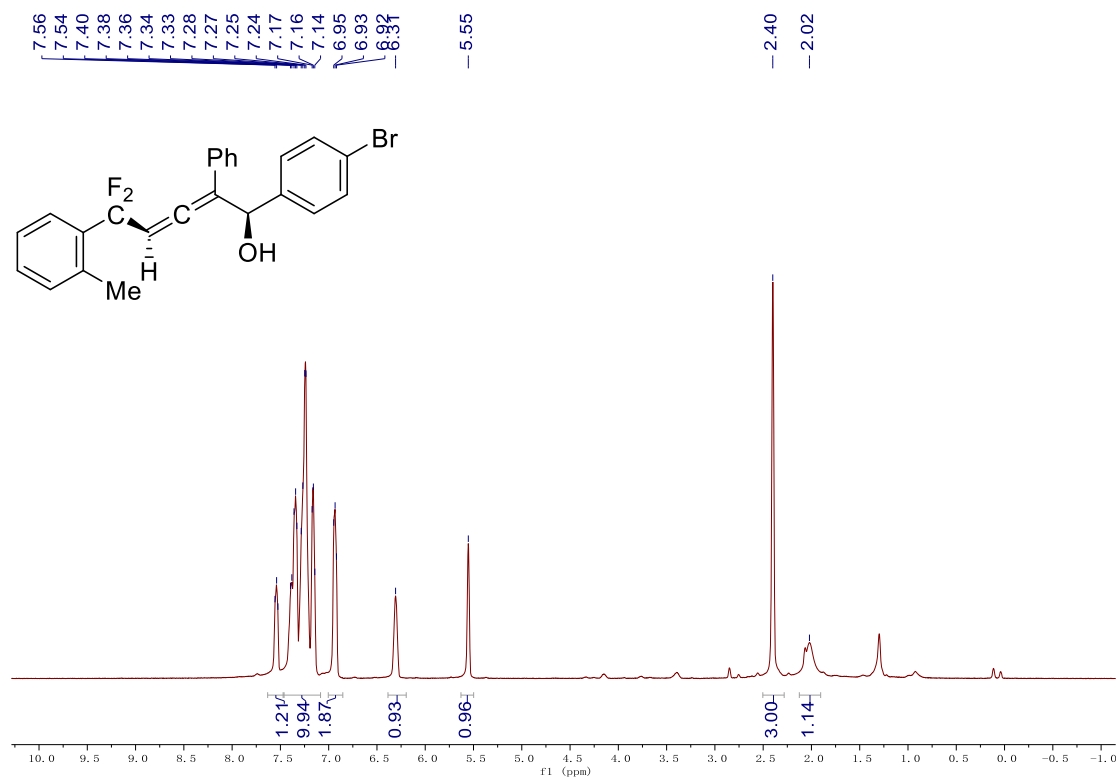

**(-)-(1R,3S)-1-(4-bromophenyl)-5,5-difluoro-2-phenyl-5-(*o*-tolyl)penta-2,3-dien-1-ol (5d): <sup>13</sup>C NMR (101 MHz, CDCl<sub>3</sub>)**

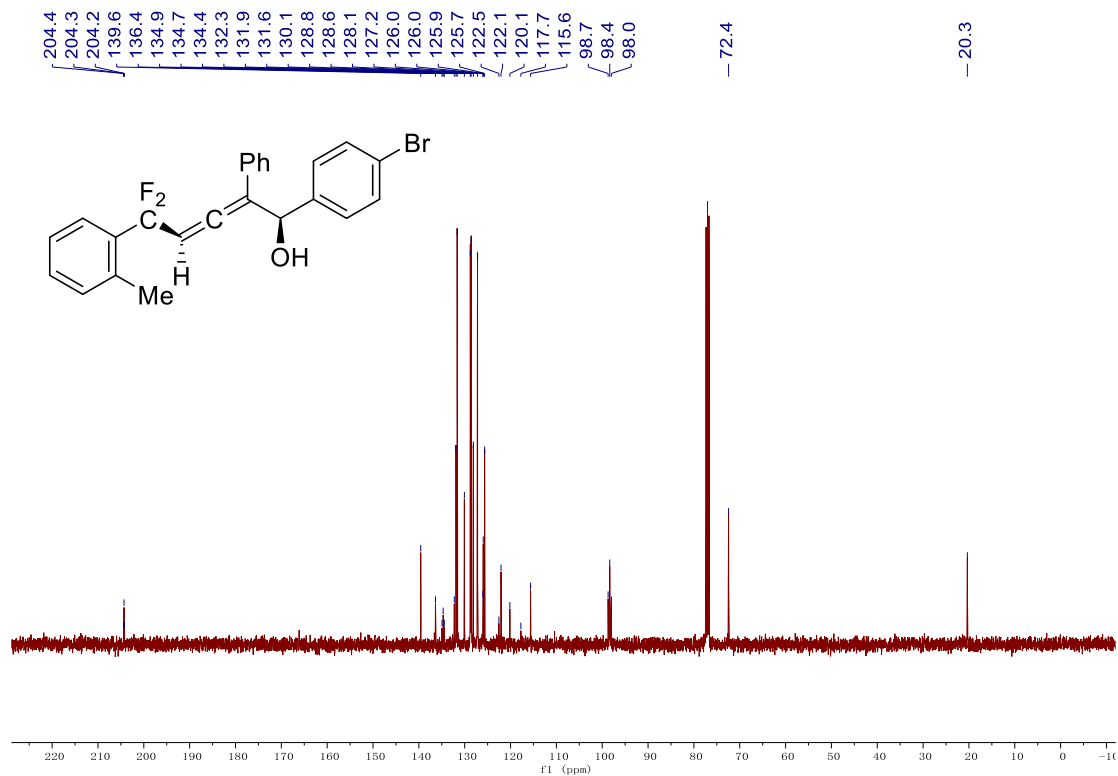

**(-)-(1R,3S)-1-(4-bromophenyl)-5,5-difluoro-2-phenyl-5-(*o*-tolyl)penta-2,3-dien-1-ol (5d):  $^{19}\text{F}$  NMR (376 MHz,  $\text{CDCl}_3$ )**

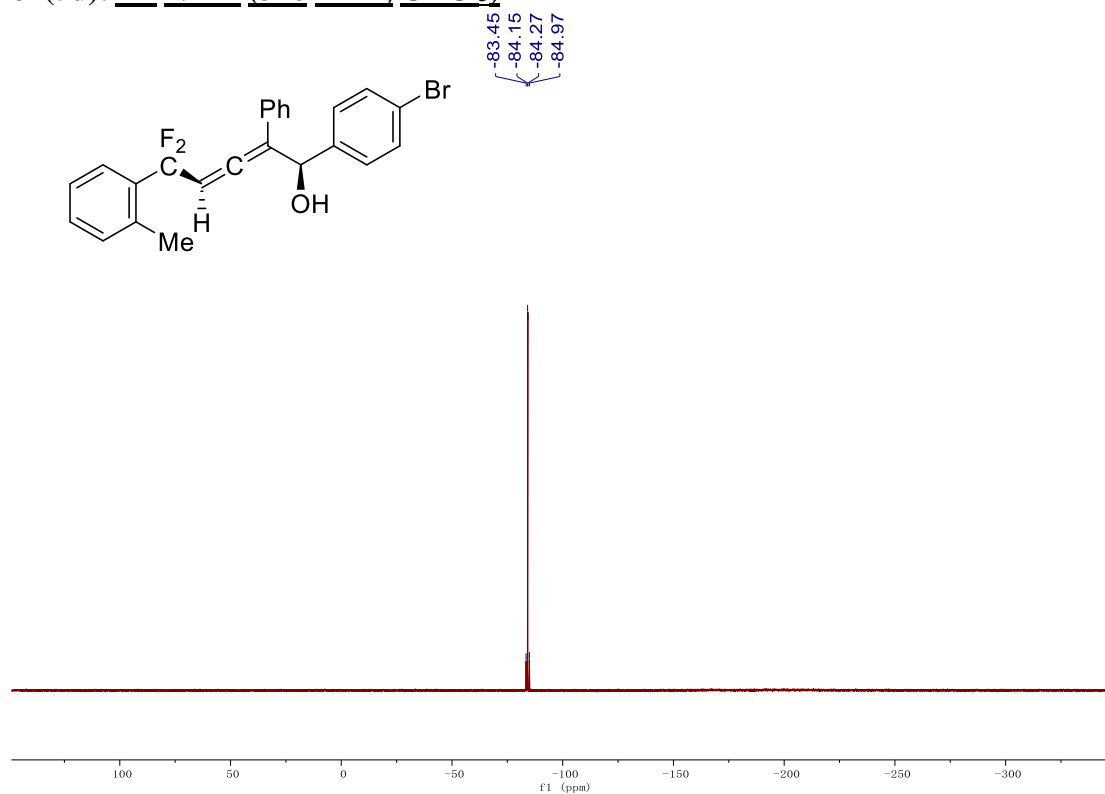

**(-)-(1R,3S)-5,5-difluoro-1-(4-methoxyphenyl)-2-phenyl-5-(*o*-tolyl)penta-2,3-dien-1-ol (5e):  $^1\text{H}$  NMR (400 MHz,  $\text{CDCl}_3$ )**

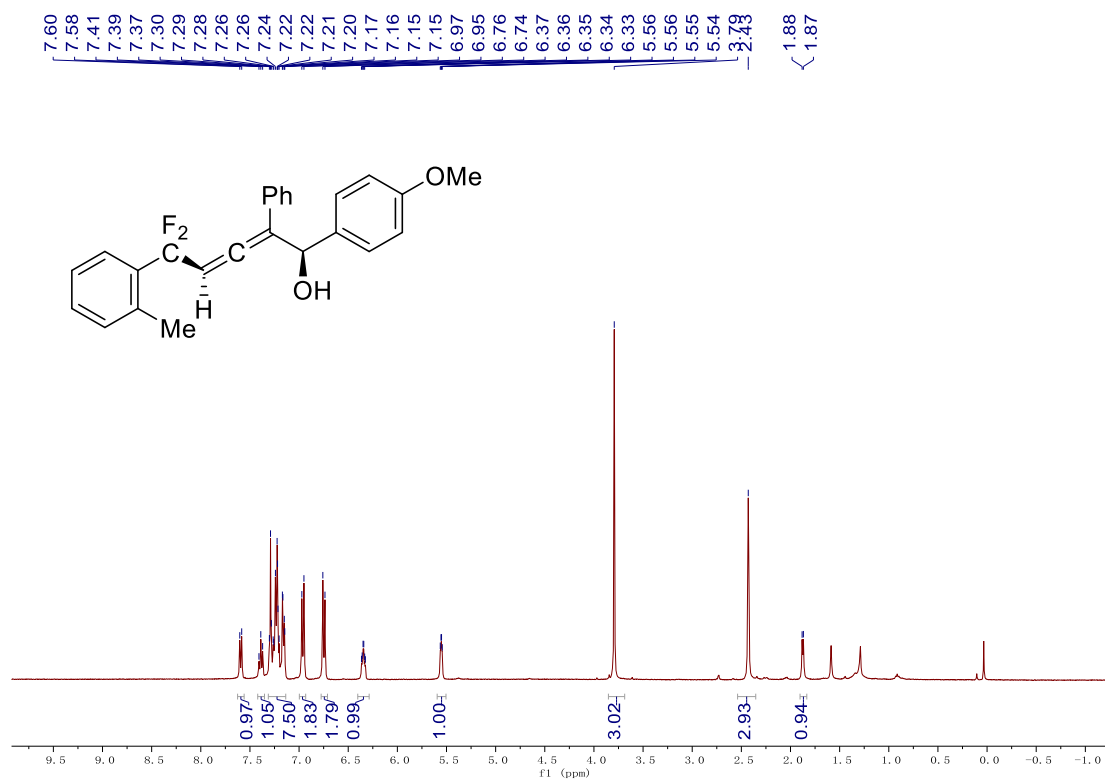

**(-)-(1R,3S)-5,5-difluoro-1-(4-methoxyphenyl)-2-phenyl-5-(*o*-tolyl)penta-2,3-dien-1-ol (5e):  $^{13}\text{C}$  NMR (101 MHz,  $\text{CDCl}_3$ )**

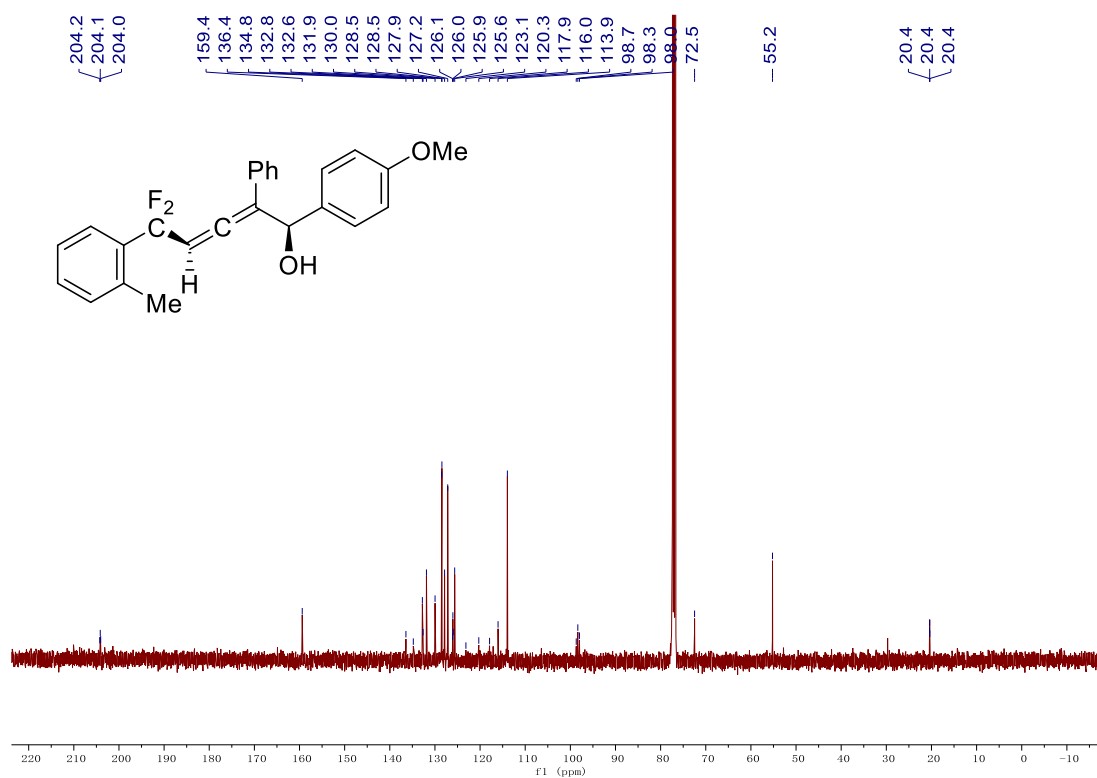

**(-)-(1R,3S)-5,5-difluoro-1-(4-methoxyphenyl)-2-phenyl-5-(*o*-tolyl)penta-2,3-dien-1-ol (5e):  $^{19}\text{F}$  NMR (376 MHz,  $\text{CDCl}_3$ )**

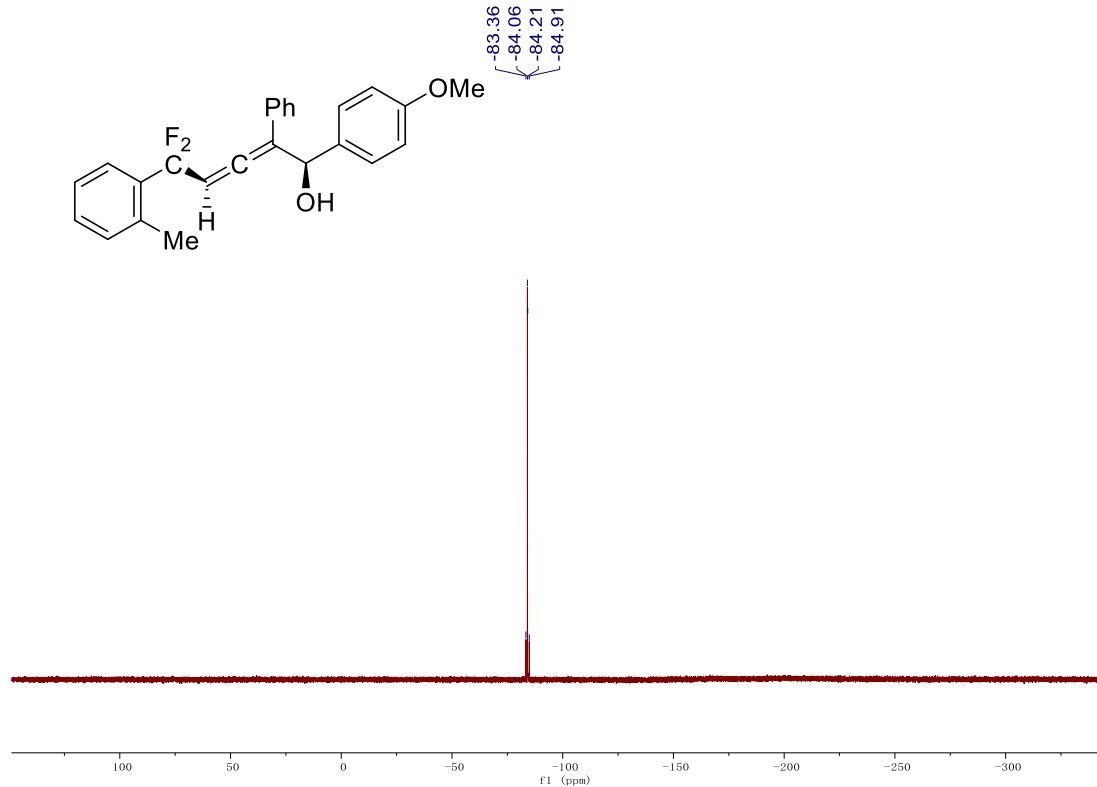

**(-)-(1*S*,3*S*)-5,5-difluoro-2-phenyl-1-(thiophen-2-yl)-5-(*o*-tolyl)penta-2,3-dien-1-ol**  
**(5f): <sup>1</sup>H NMR (400 MHz, CDCl<sub>3</sub>)**

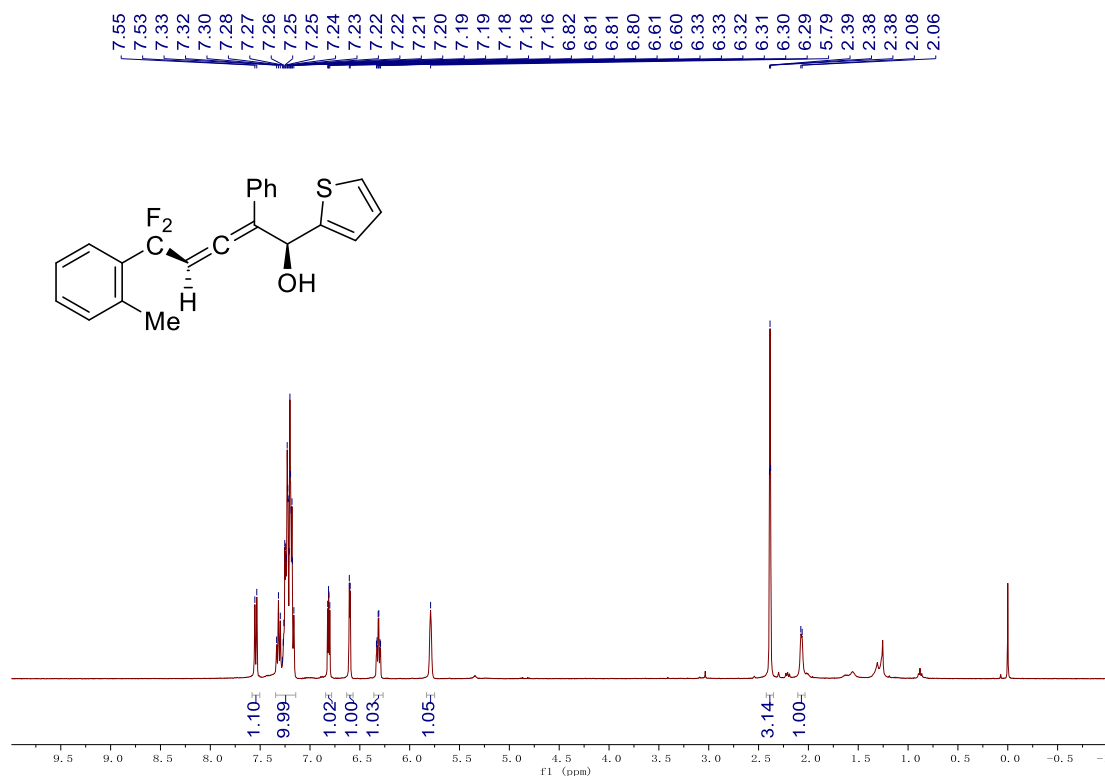

**(-)-(1*S*,3*S*)-5,5-difluoro-2-phenyl-1-(thiophen-2-yl)-5-(*o*-tolyl)penta-2,3-dien-1-ol**  
**(5f): <sup>13</sup>C NMR (101 MHz, CDCl<sub>3</sub>)**

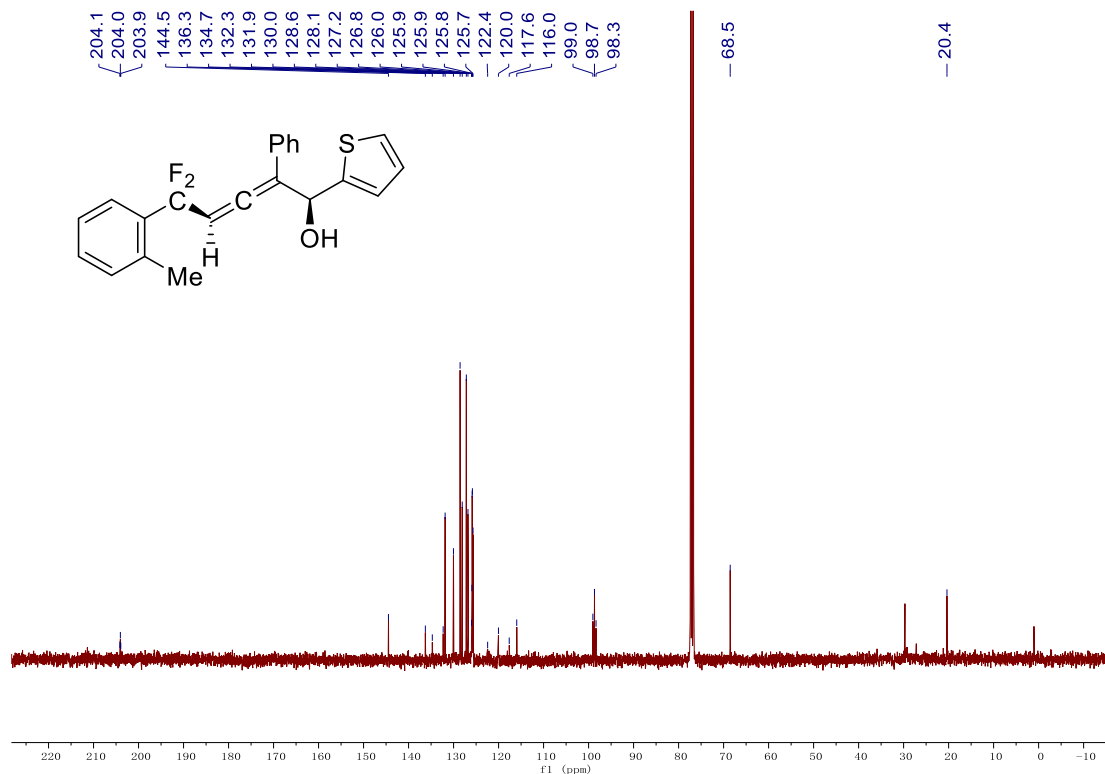

**(-)-(1*S*,3*S*)-5,5-difluoro-2-phenyl-1-(thiophen-2-yl)-5-(*o*-tolyl)penta-2,3-dien-1-ol (5f):  $^{19}\text{F}$  NMR (376 MHz,  $\text{CDCl}_3$ )**

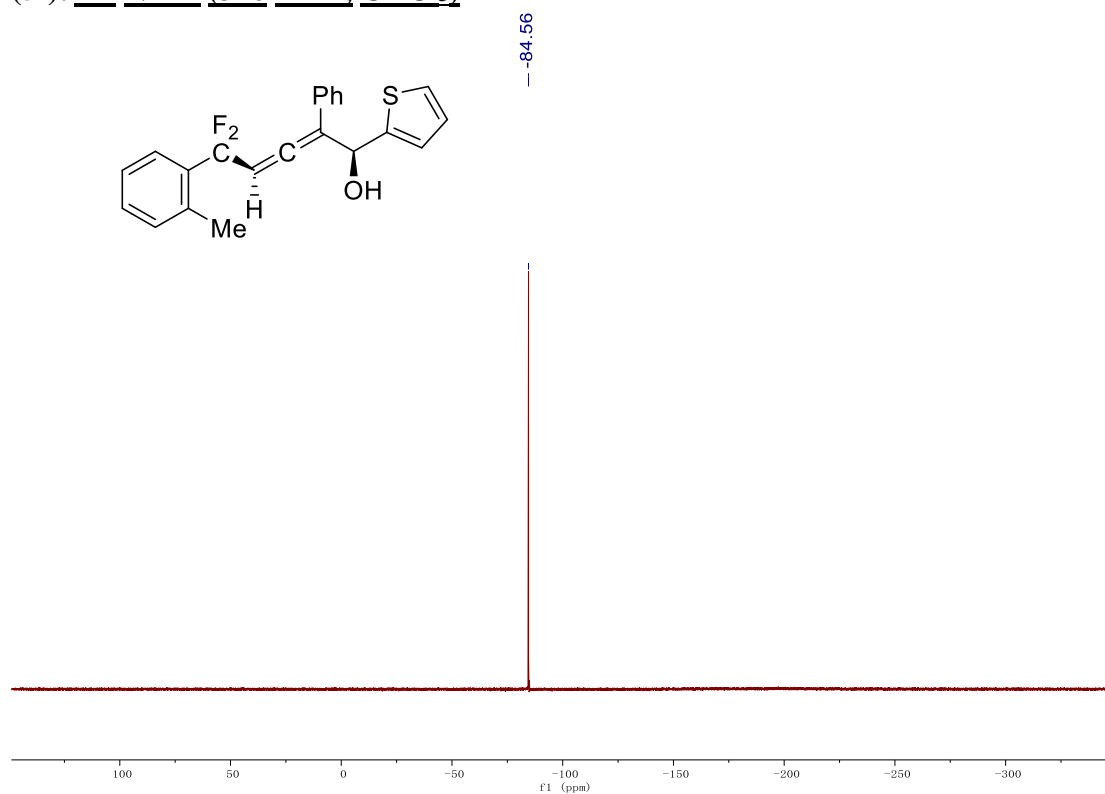

**(-)-(1*S*,3*S*)-5,5-difluoro-1-(furan-2-yl)-2-phenyl-5-(*o*-tolyl)penta-2,3-dien-1-ol (5g):  $^1\text{H}$  NMR (400 MHz,  $\text{CDCl}_3$ )**

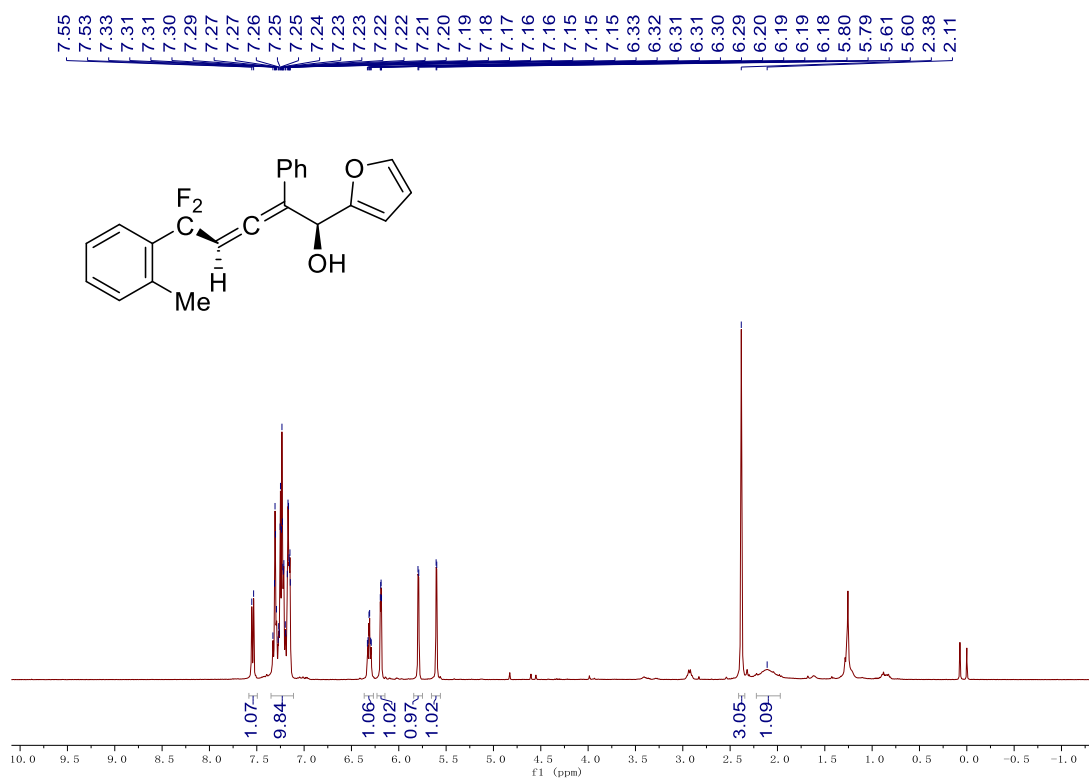

**(-)-(1*S*,3*S*)-5,5-difluoro-1-(furan-2-yl)-2-phenyl-5-(*o*-tolyl)penta-2,3-dien-1-ol**

**(5g): <sup>13</sup>C NMR (101 MHz, CDCl<sub>3</sub>)**

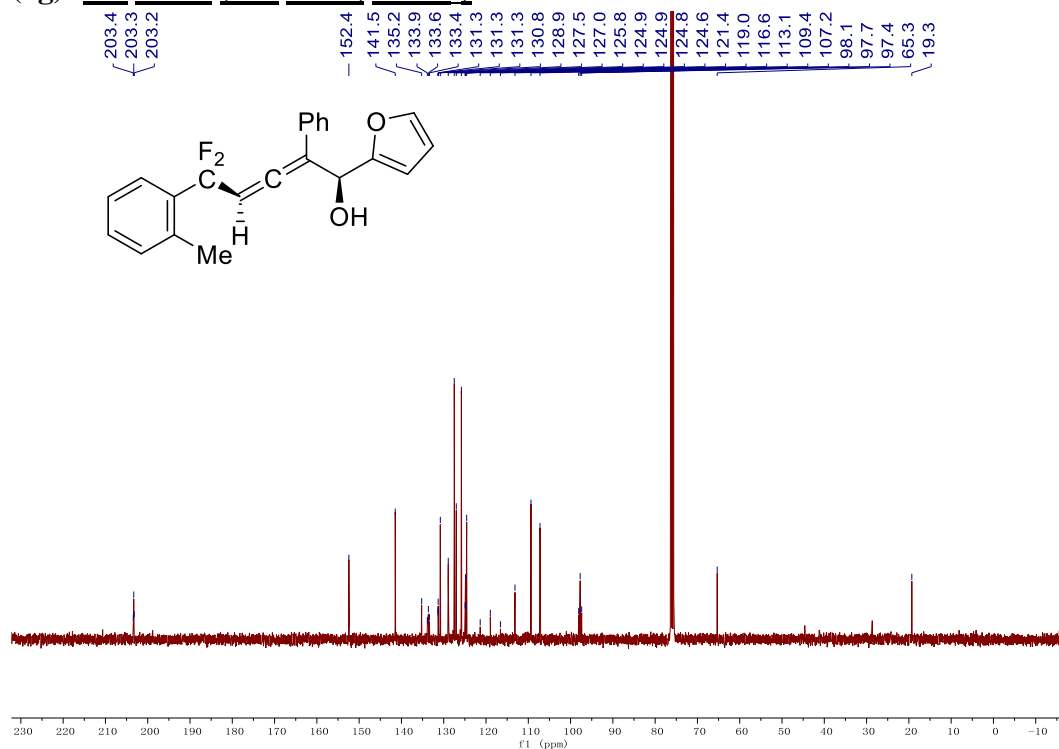

**(-)-(1*S*,3*S*)-5,5-difluoro-1-(furan-2-yl)-2-phenyl-5-(*o*-tolyl)penta-2,3-dien-1-ol (5g):**

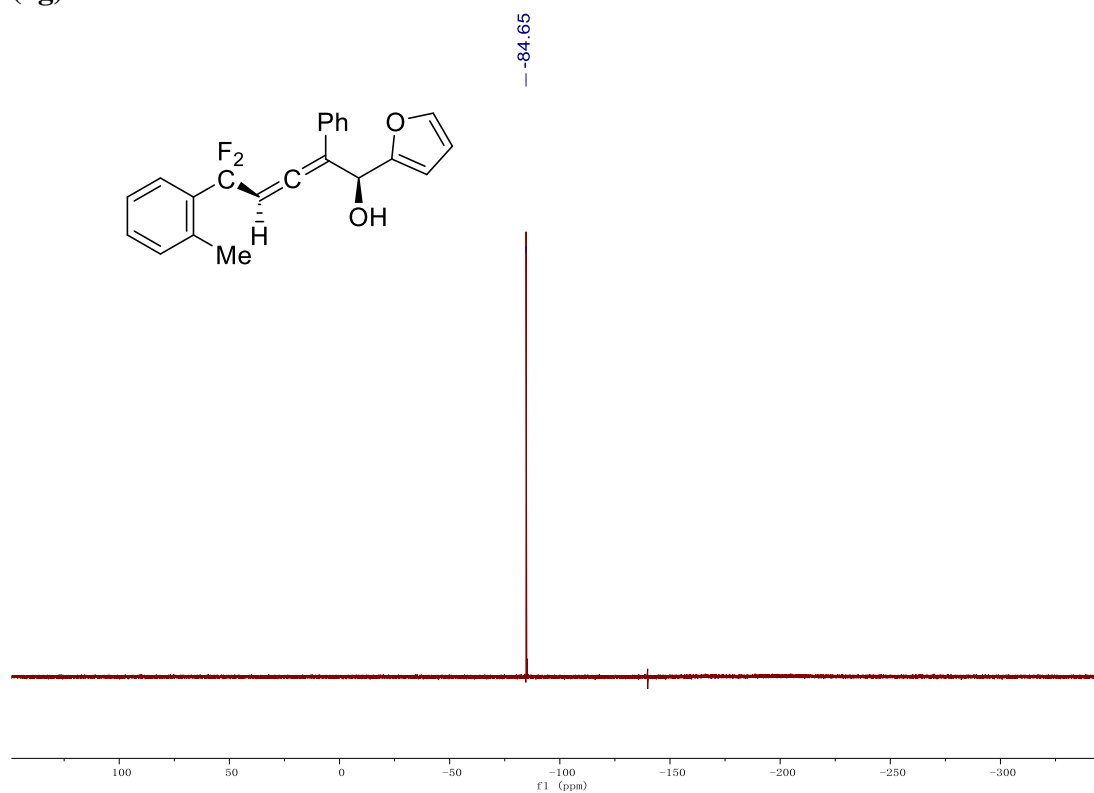

**(-)-(3R,5S)-7,7-difluoro-1,4-diphenyl-7-(*o*-tolyl)hepta-4,5-dien-3-ol (5h):  $^1\text{H}$  NMR (400 MHz,  $\text{CDCl}_3$ )**

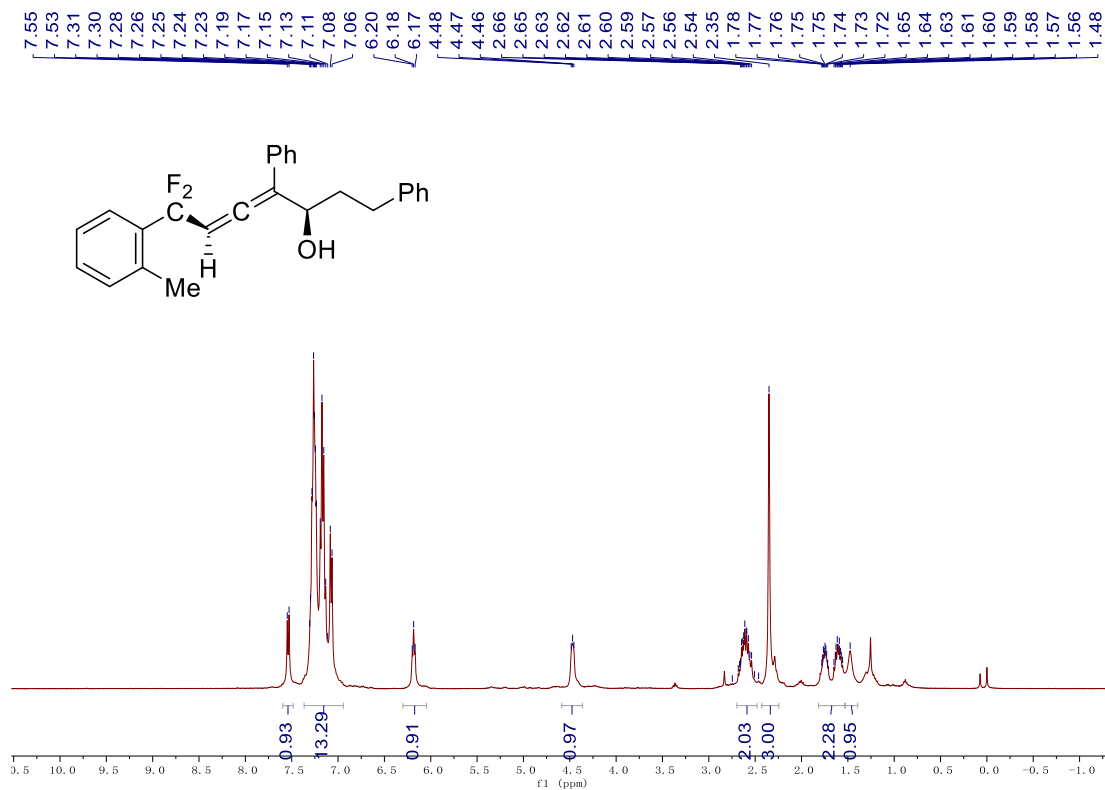

**(-)-(3R,5S)-7,7-difluoro-1,4-diphenyl-7-(*o*-tolyl)hepta-4,5-dien-3-ol (5h):  $^{13}\text{C}$  NMR (101 MHz,  $\text{CDCl}_3$ )**

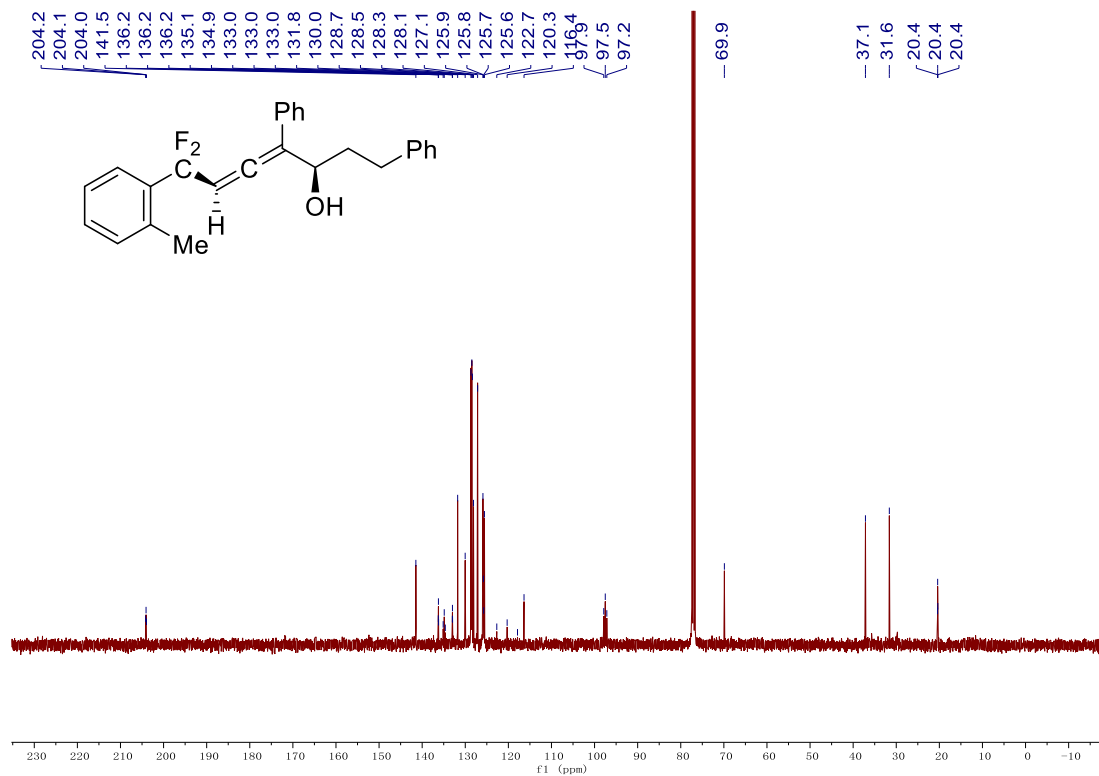



**(-)-(3*R*,5*S*)-7,7-difluoro-1,4-diphenyl-7-(*o*-tolyl)hepta-4,5-dien-3-ol (5h): <sup>19</sup>F NMR (376 MHz, CDCl<sub>3</sub>)**

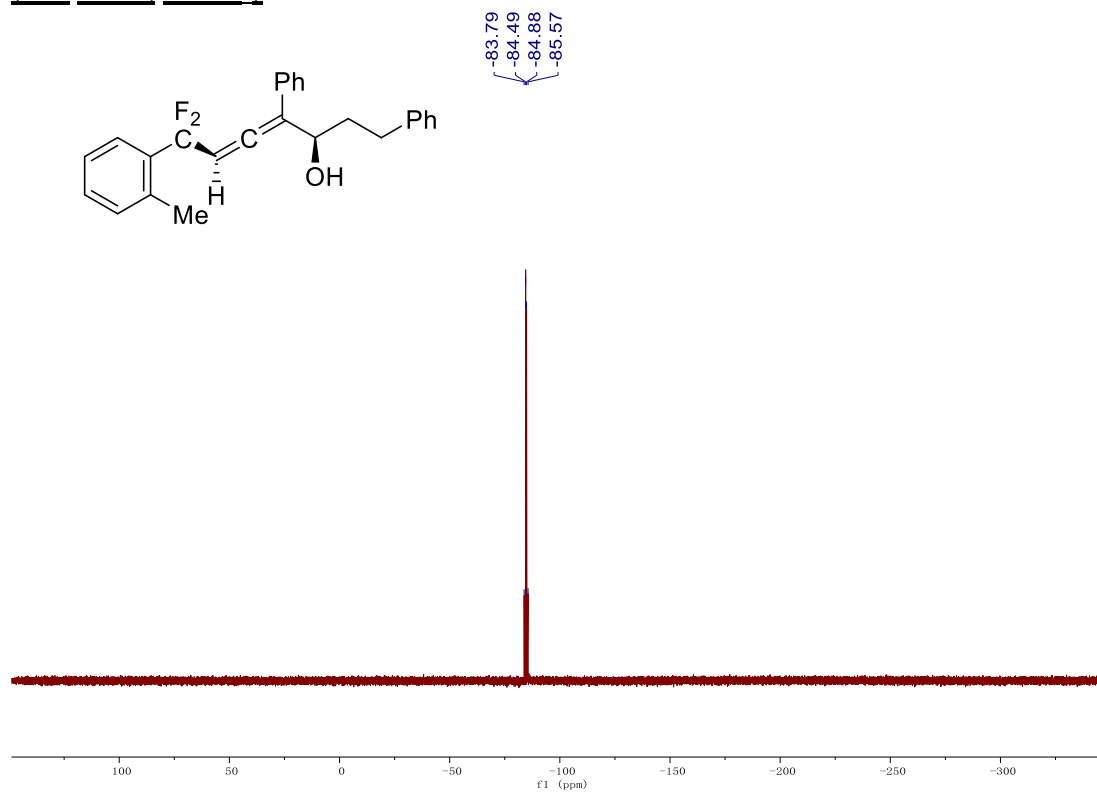

**(-)-(2*R*,4*S*)-6,6-difluoro-1,3-diphenyl-6-(*o*-tolyl)hexa-3,4-dien-2-ol (5i): <sup>1</sup>H NMR (400 MHz, CDCl<sub>3</sub>)**

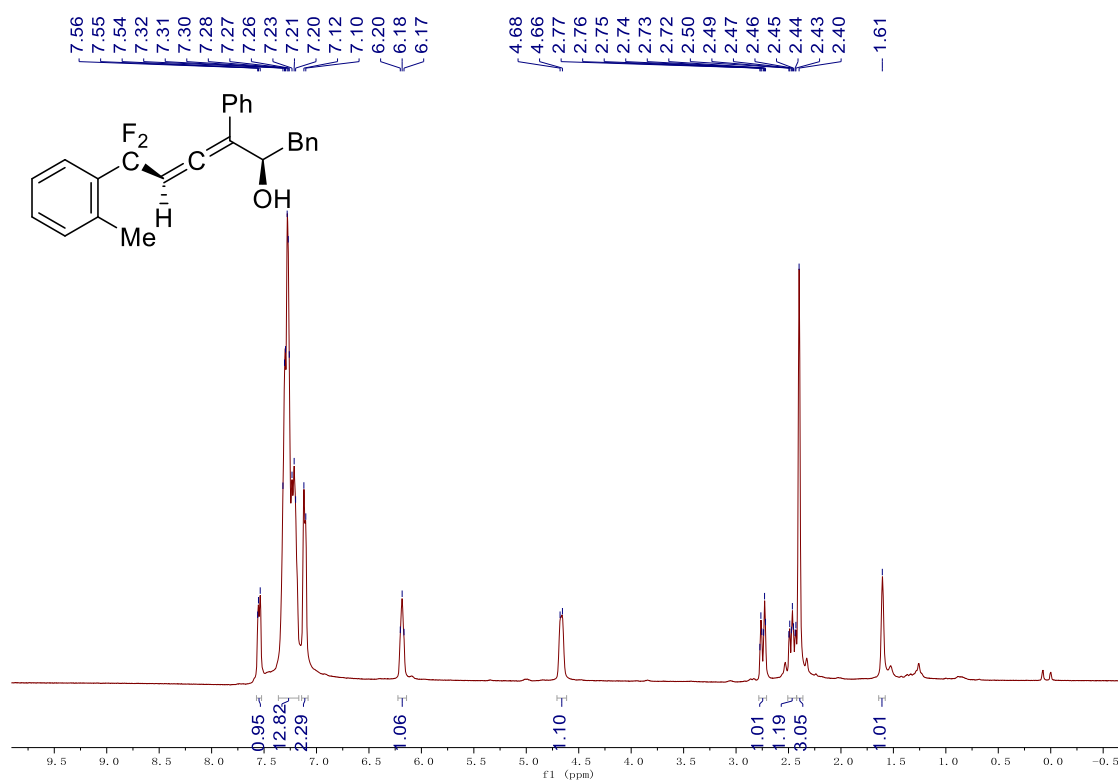

**(-)-(2*R*,4*S*)-6,6-difluoro-1,3-diphenyl-6-(*o*-tolyl)hexa-3,4-dien-2-ol (5i):  $^{13}\text{C}$  NMR**  
**(101 MHz,  $\text{CDCl}_3$ )**

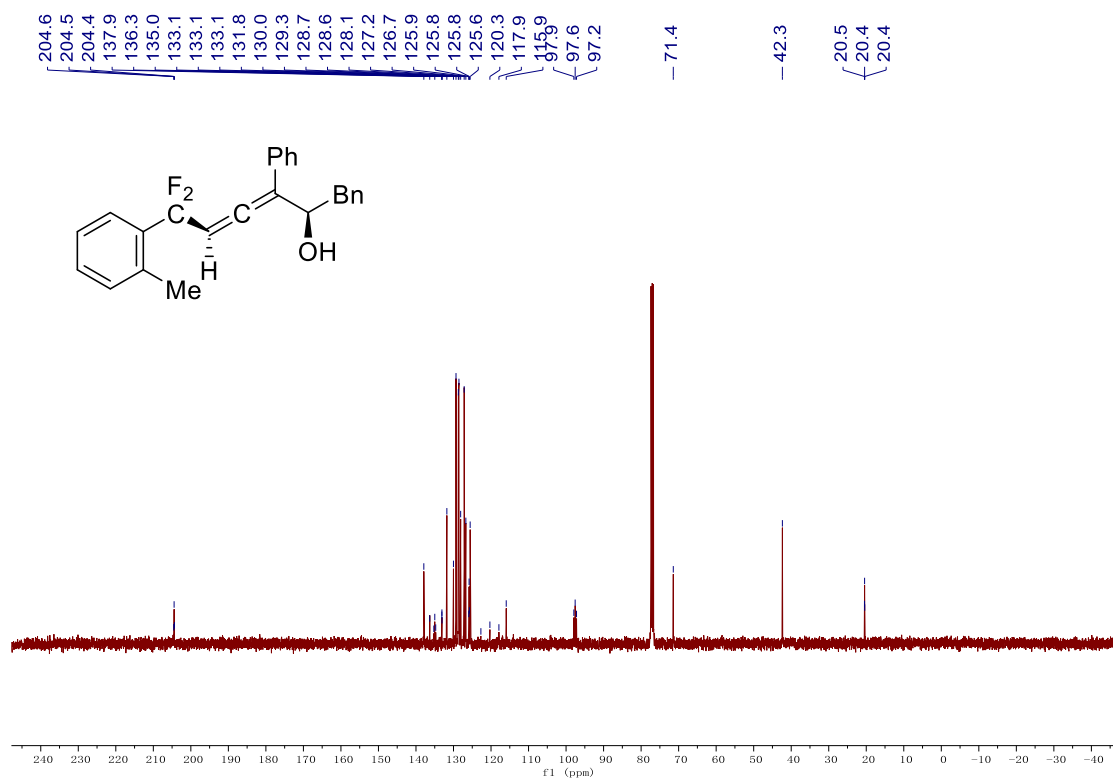

**(-)-(2*R*,4*S*)-6,6-difluoro-1,3-diphenyl-6-(*o*-tolyl)hexa-3,4-dien-2-ol (5i):  $^{19}\text{F}$  NMR**  
**(376 MHz,  $\text{CDCl}_3$ )**

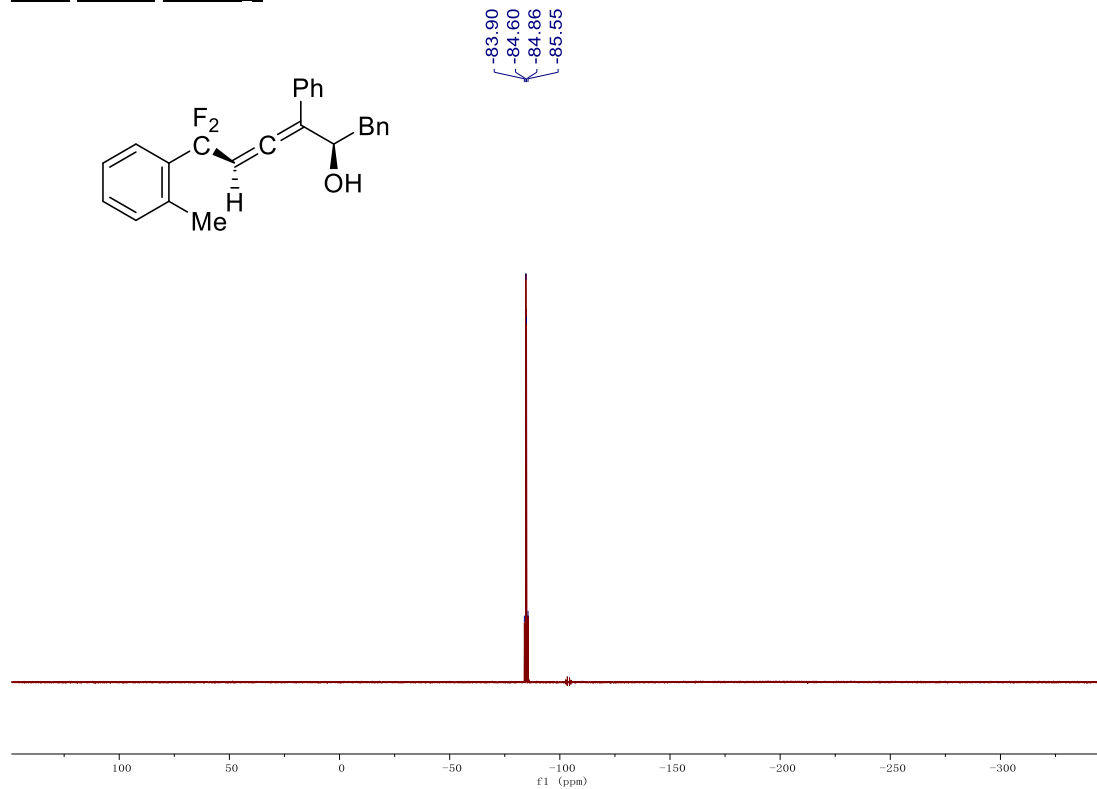

**(-)-(1R,3S)-1-cyclopentyl-5,5-difluoro-2-phenyl-5-(*o*-tolyl)penta-2,3-dien-1-ol (5j):**

**<sup>1</sup>H NMR (400 MHz, CDCl<sub>3</sub>)**

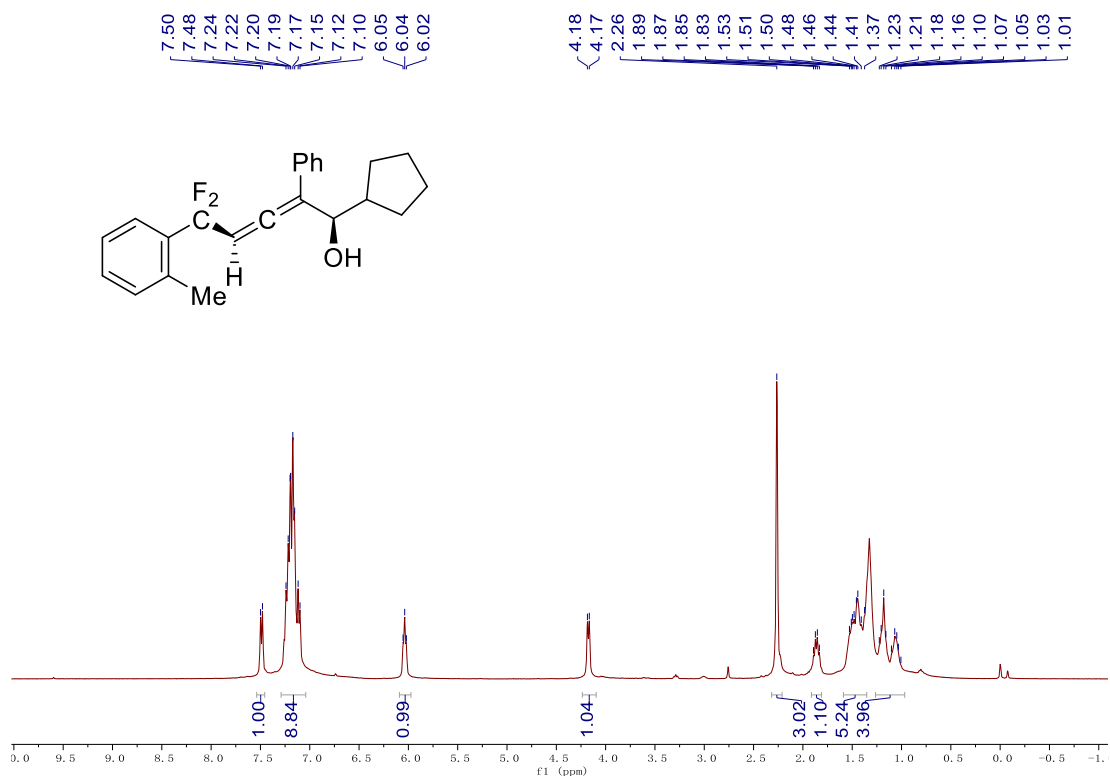

**(-)-(1R,3S)-1-cyclopentyl-5,5-difluoro-2-phenyl-5-(*o*-tolyl)penta-2,3-dien-1-ol (5j):**

**<sup>13</sup>C NMR (101 MHz, CDCl<sub>3</sub>)**

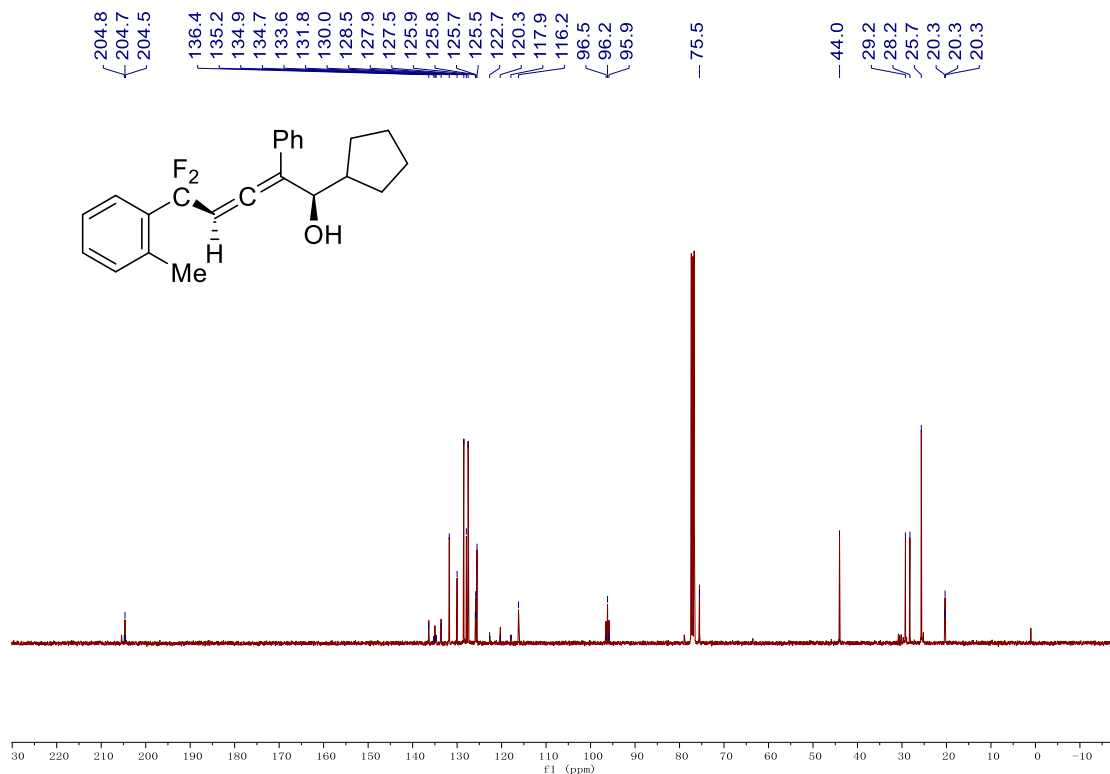

**(-)-(1R,3S)-1-cyclopentyl-5,5-difluoro-2-phenyl-5-(*o*-tolyl)penta-2,3-dien-1-ol (5j):**  
**<sup>19</sup>F NMR (376 MHz, CDCl<sub>3</sub>)**

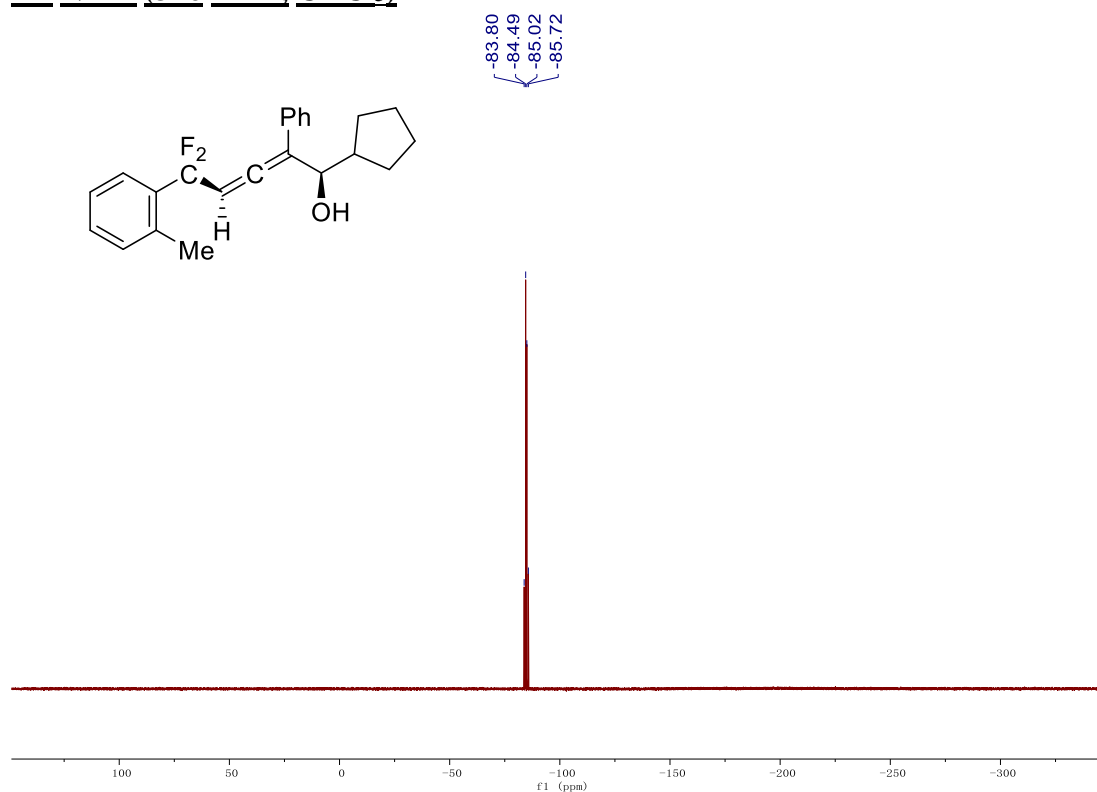

**(-)-tert-butyl((2S,3S,5S)-7,7-difluoro-3-hydroxy-1,4-diphenyl-7-(*o*-tolyl)hepta-4,5-dien-2-yl)carbamate (5k):**  
**<sup>1</sup>H NMR (400 MHz, CDCl<sub>3</sub>)**

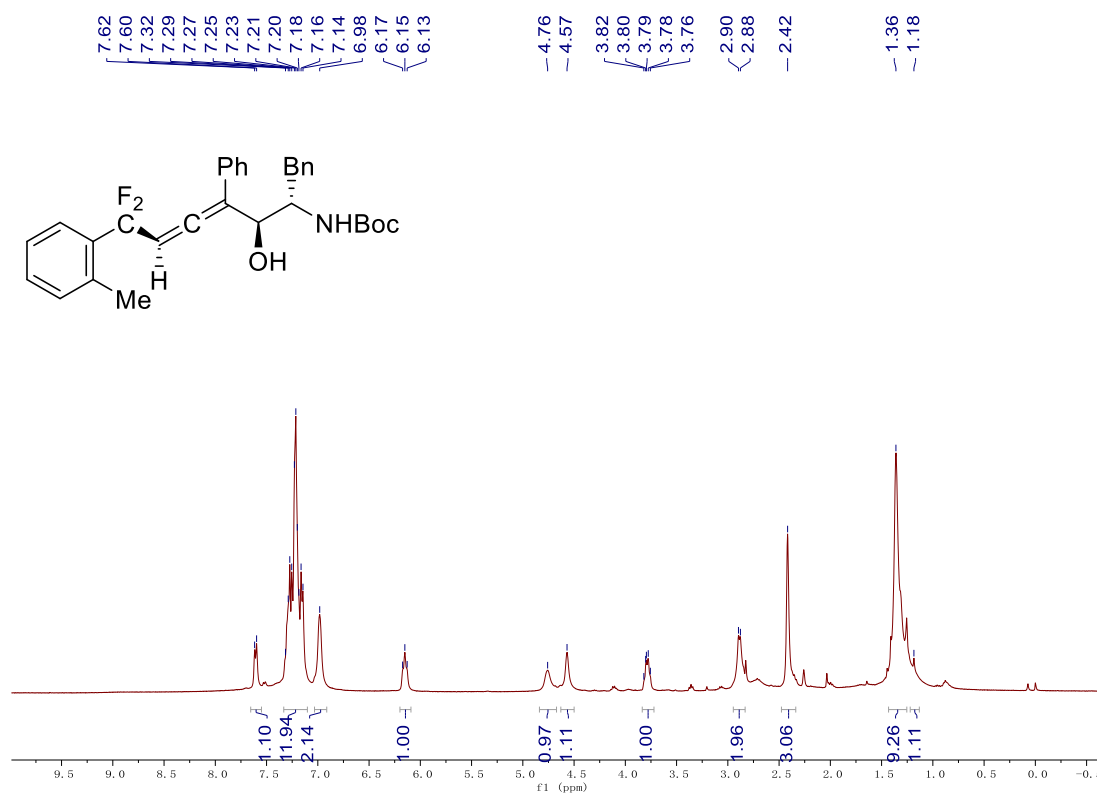

**(-)-tert-butyl((2*S*,3*S*,5*S*)-7,7-difluoro-3-hydroxy-1,4-diphenyl-7-(*o*-tolyl)hepta-4,5-dien-2-yl)carbamate (5k): <sup>13</sup>C NMR (101 MHz, CDCl<sub>3</sub>)**

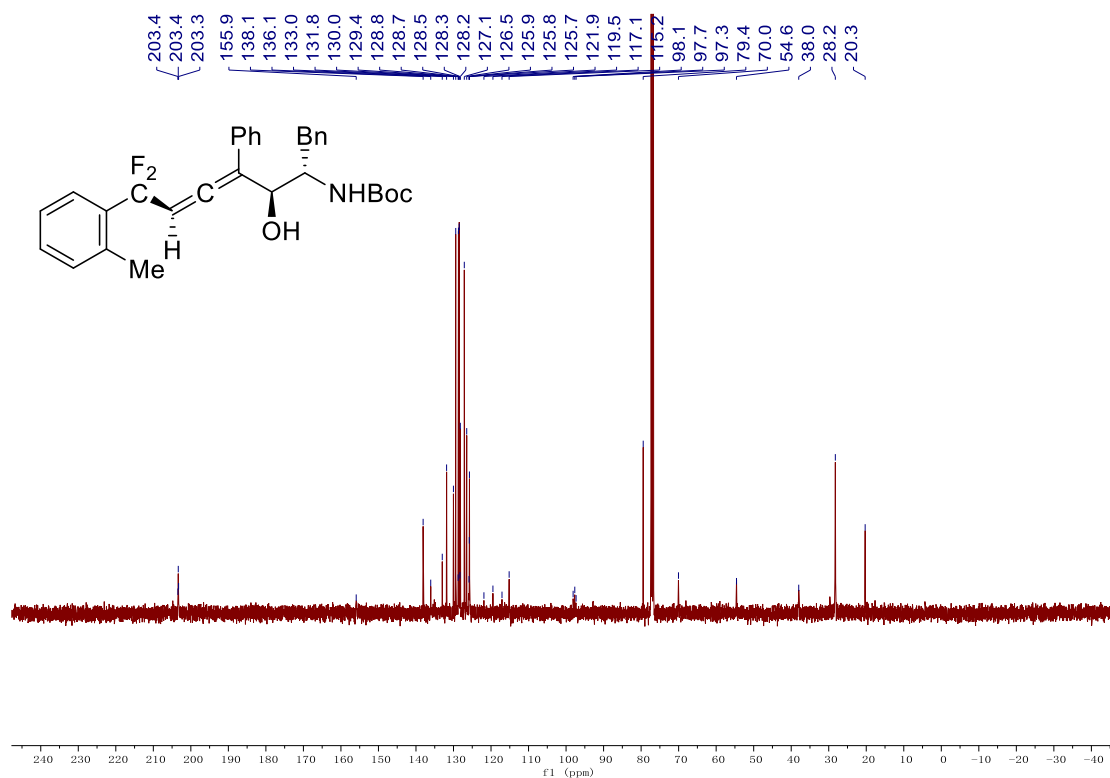

**(-)-tert-butyl((2*S*,3*S*,5*S*)-7,7-difluoro-3-hydroxy-1,4-diphenyl-7-(*o*-tolyl)hepta-4,5-dien-2-yl)carbamate (5k): <sup>19</sup>F NMR (376 MHz, CDCl<sub>3</sub>)**

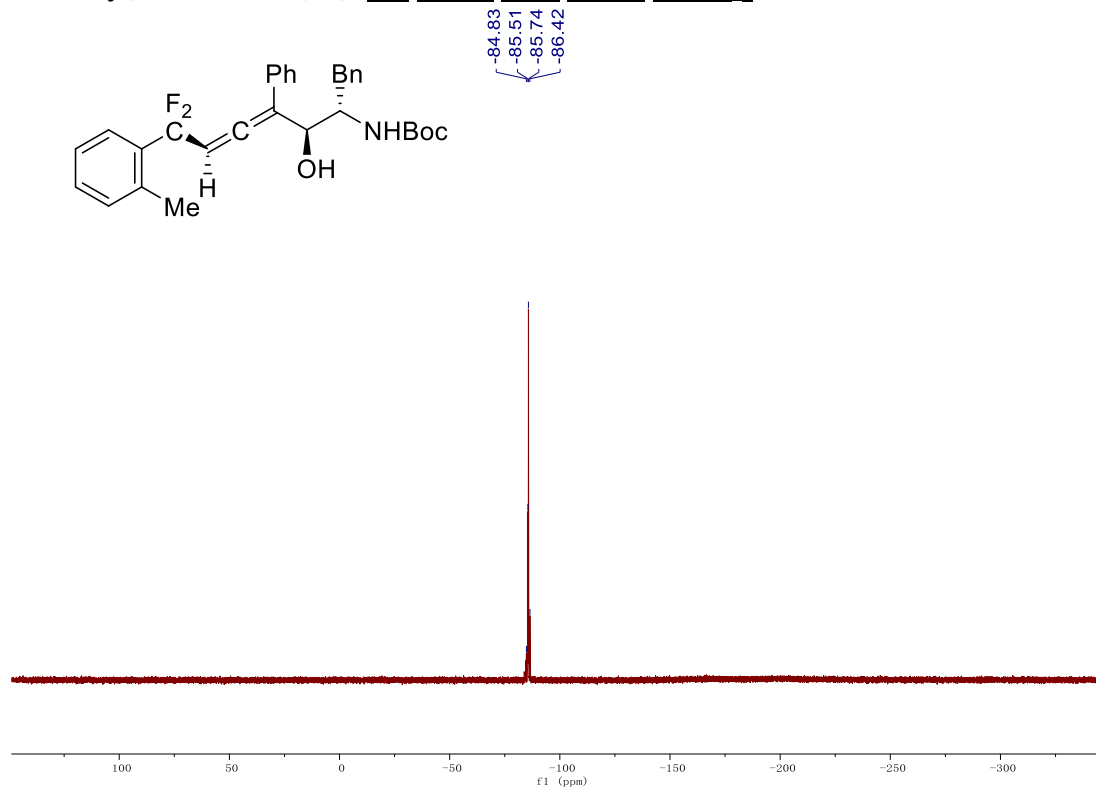

**(-)-tert-butyl((2*S*,3*S*,5*S*)-7,7-difluoro-3-hydroxy-4-phenyl-7-(*o*-tolyl)hepta-4,5-dien-2-yl)carbamate (51): <sup>1</sup>H NMR (400 MHz, CDCl<sub>3</sub>)**

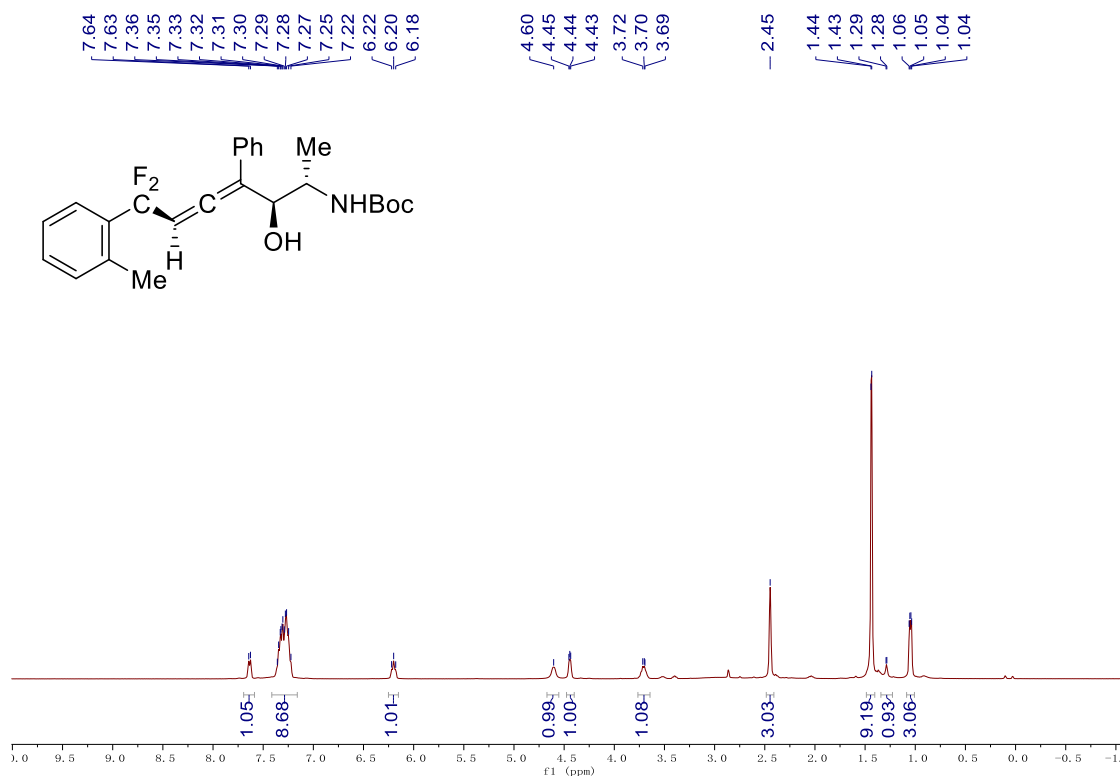

**(-)-tert-butyl((2*S*,3*S*,5*S*)-7,7-difluoro-3-hydroxy-4-phenyl-7-(*o*-tolyl)hepta-4,5-dien-2-yl)carbamate (51): <sup>13</sup>C NMR (101 MHz, CDCl<sub>3</sub>)**

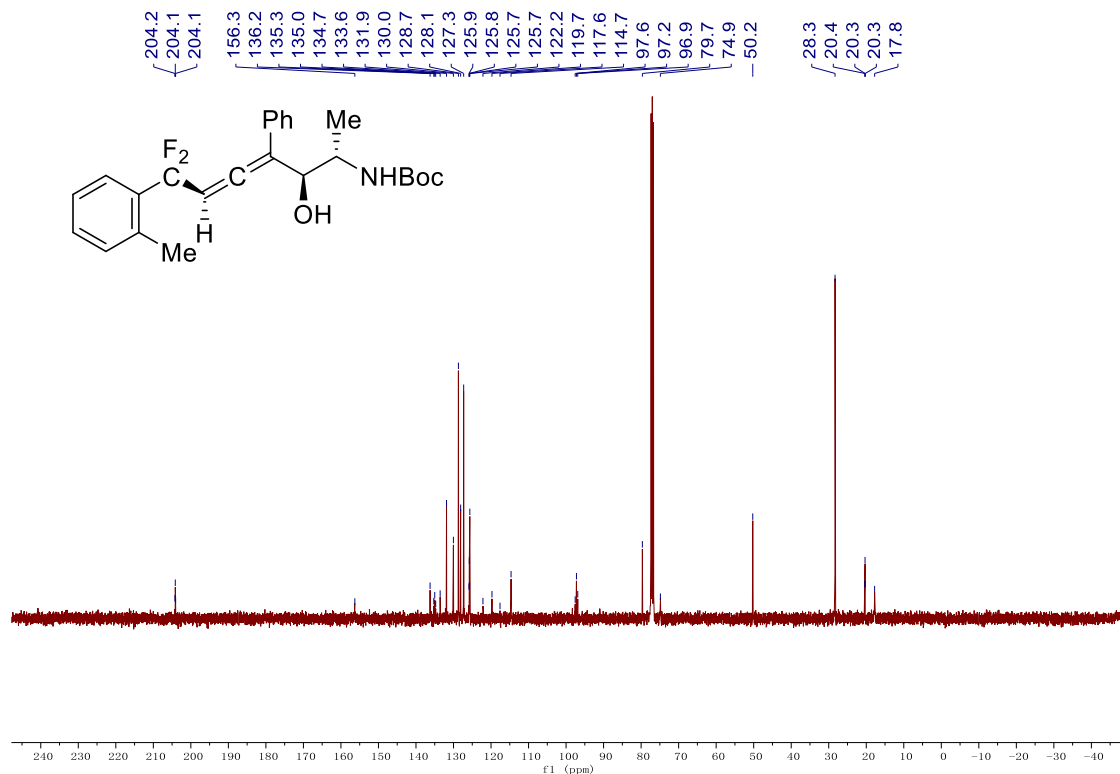

**(-)-tert-butyl((2*S*,3*S*,5*S*)-7,7-difluoro-3-hydroxy-4-phenyl-7-(*o*-tolyl)hepta-4,5-dien-2-yl)carbamate (51): <sup>19</sup>F NMR (376 MHz, CDCl<sub>3</sub>)**

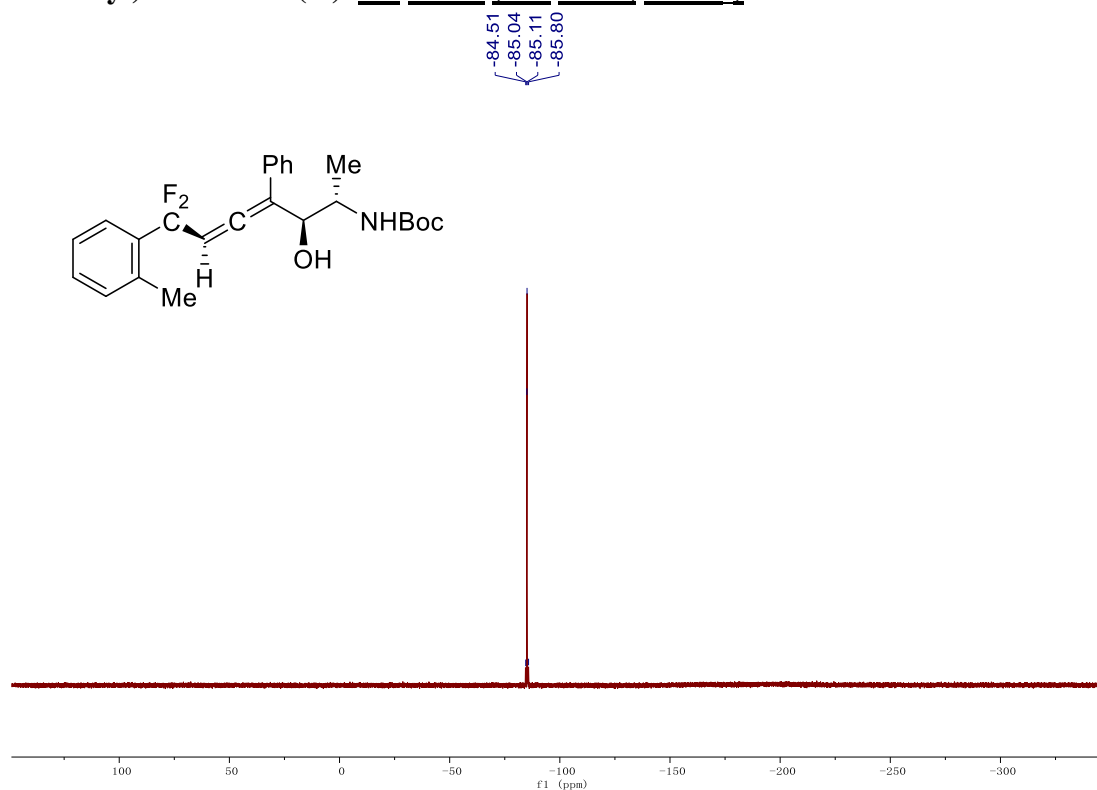

**(-)-(2*R*,5*R*)-2-([1,1'-biphenyl]-4-yl)-5-(difluoro(*o*-tolyl)methyl)-3-phenyl-2,5-dihydrofuran (6): <sup>1</sup>H NMR (400 MHz, CDCl<sub>3</sub>)**

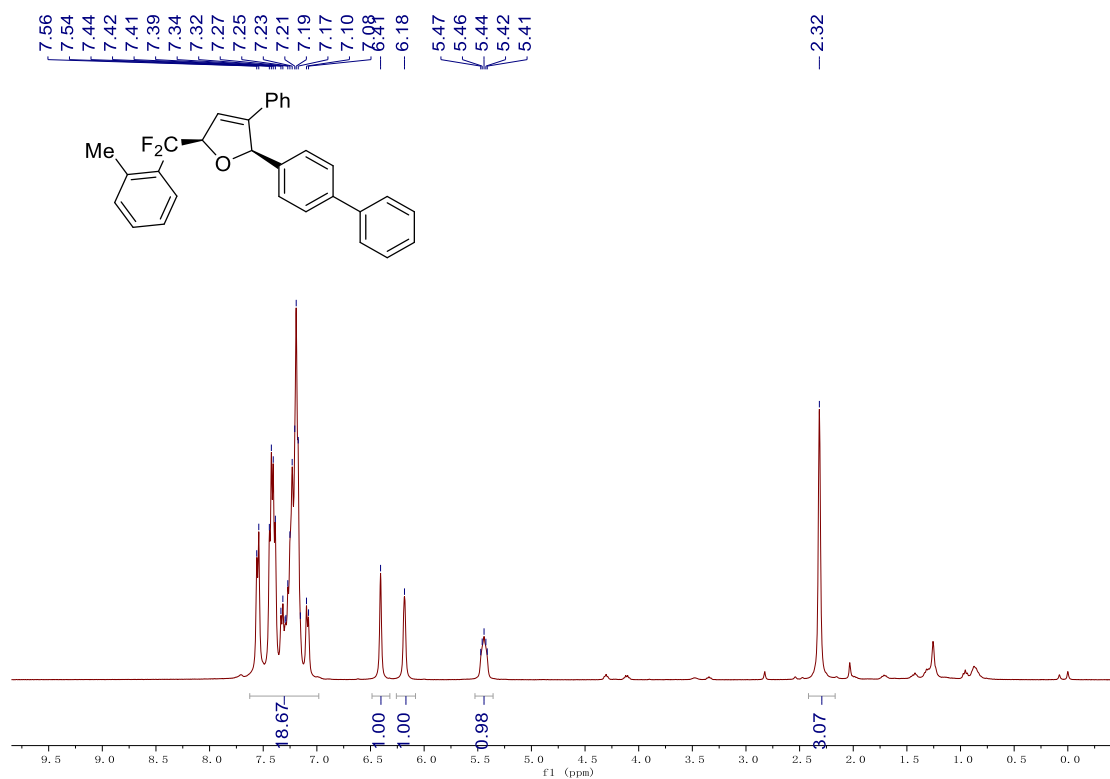

**(-)-(2*R*,5*R*)-2-([1,1'-biphenyl]-4-yl)-5-(difluoro(*o*-tolyl)methyl)-3-phenyl-2,5-dihydrofuran (6): <sup>13</sup>C NMR (101 MHz, CDCl<sub>3</sub>)**

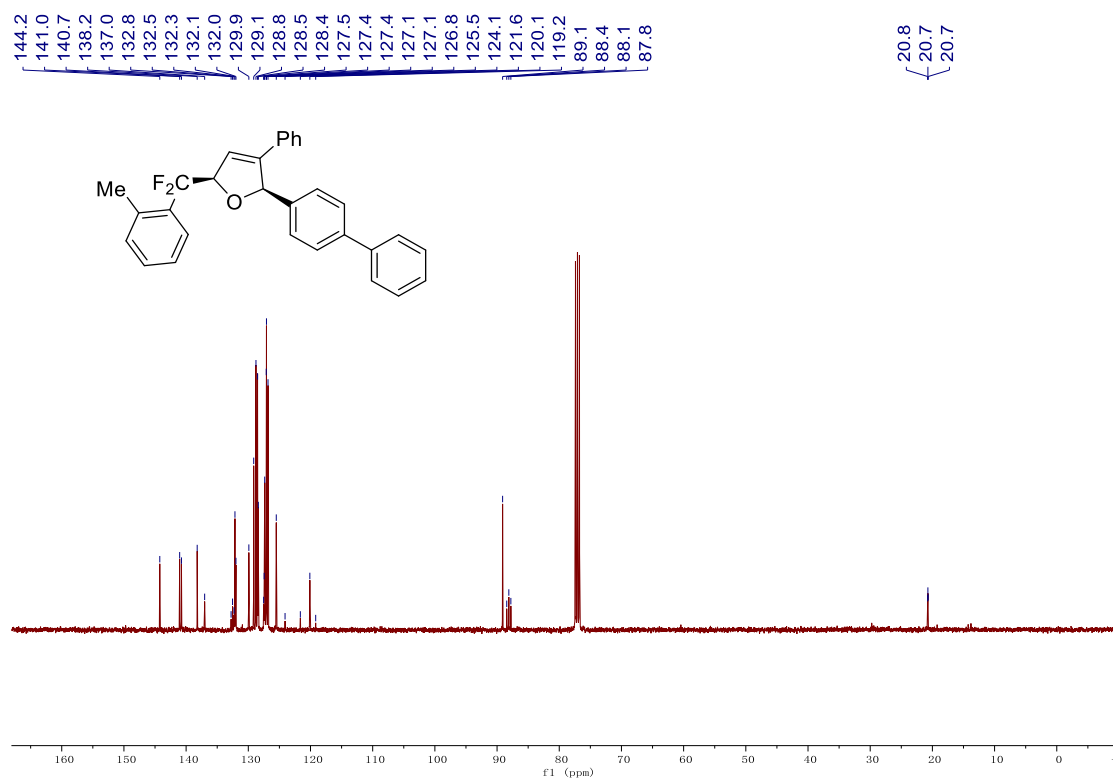

**(-)-(2*R*,5*R*)-2-([1,1'-biphenyl]-4-yl)-5-(difluoro(*o*-tolyl)methyl)-3-phenyl-2,5-dihydrofuran (6):**

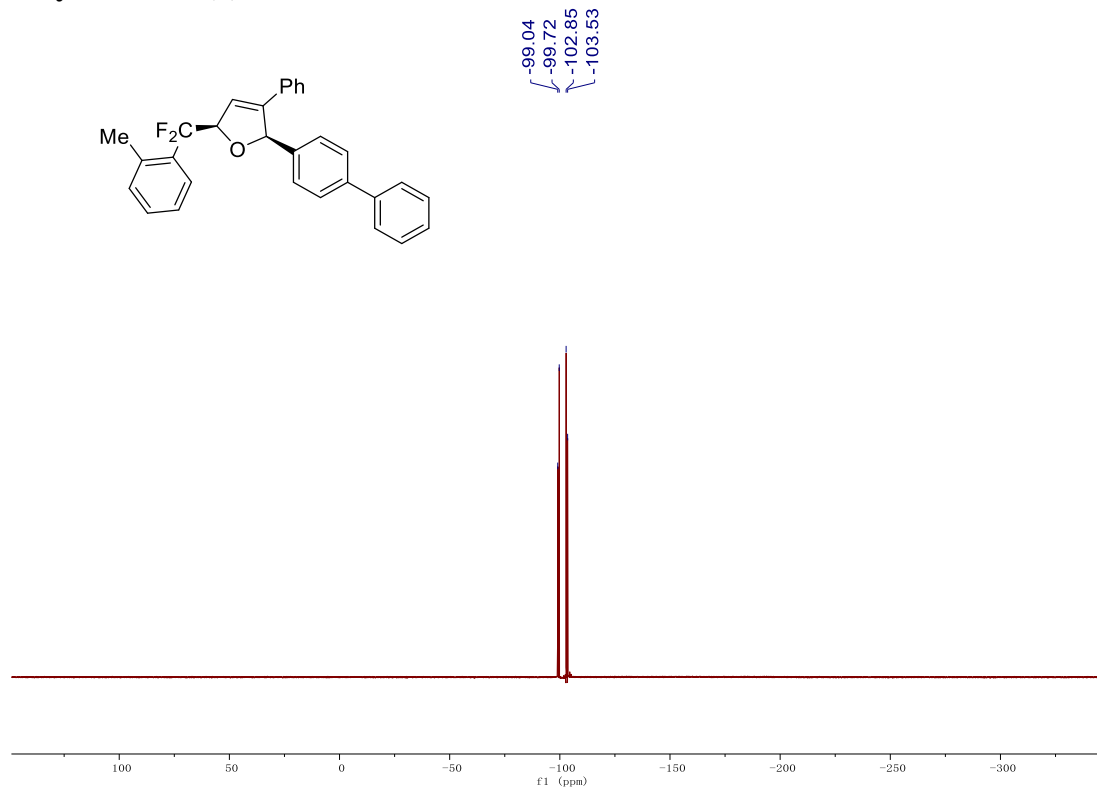



**(-)-(2*R*,5*R*)-2-([1,1'-biphenyl]-4-yl)-5-(difluoro(*o*-tolyl)methyl)-3-phenyl-2,5-dihydrofuran (6):  $^1\text{H}$ - $^1\text{H}$  Noesy (400 MHz,  $\text{CDCl}_3$ )**

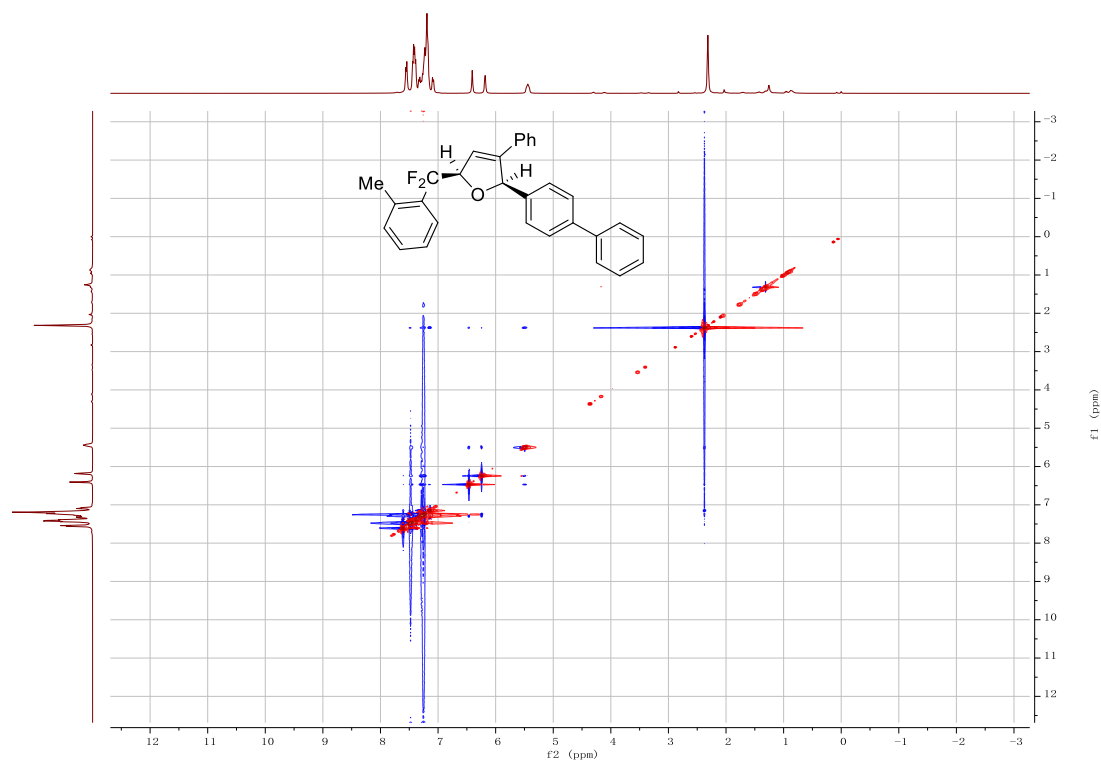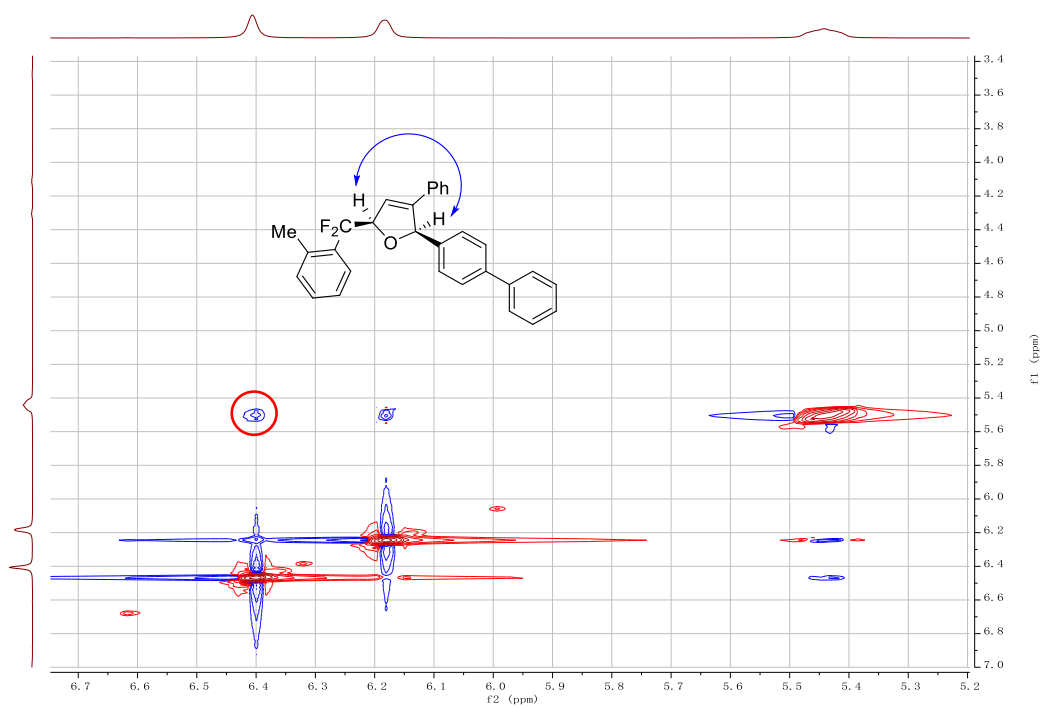

**(-)-(2*S*,3*S*,5*R*)-2-([1,1'-biphenyl]-4-yl)-5-(difluoro(*o*-tolyl)methyl)-3-phenyltetrahydrofuran (7) <sup>1</sup>H NMR (400 MHz, CDCl<sub>3</sub>)**

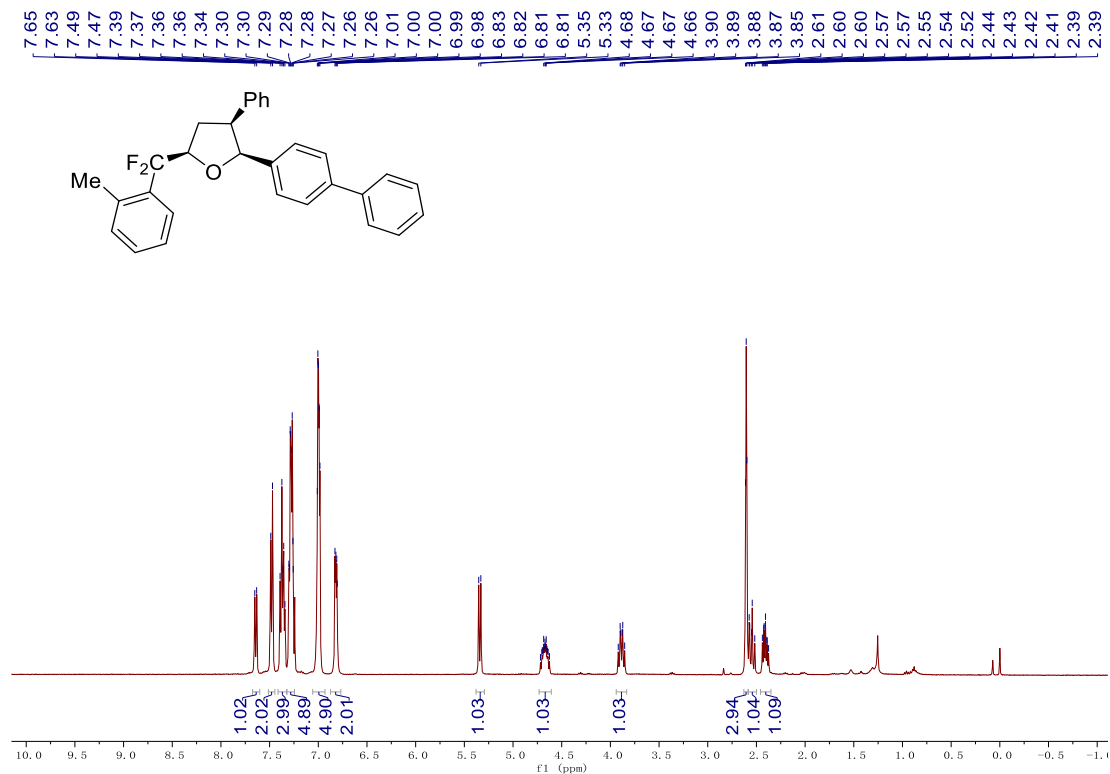

**(-)-(2*S*,3*S*,5*R*)-2-([1,1'-biphenyl]-4-yl)-5-(difluoro(*o*-tolyl)methyl)-3-phenyltetrahydrofuran (7): <sup>13</sup>C NMR (101 MHz, CDCl<sub>3</sub>)**

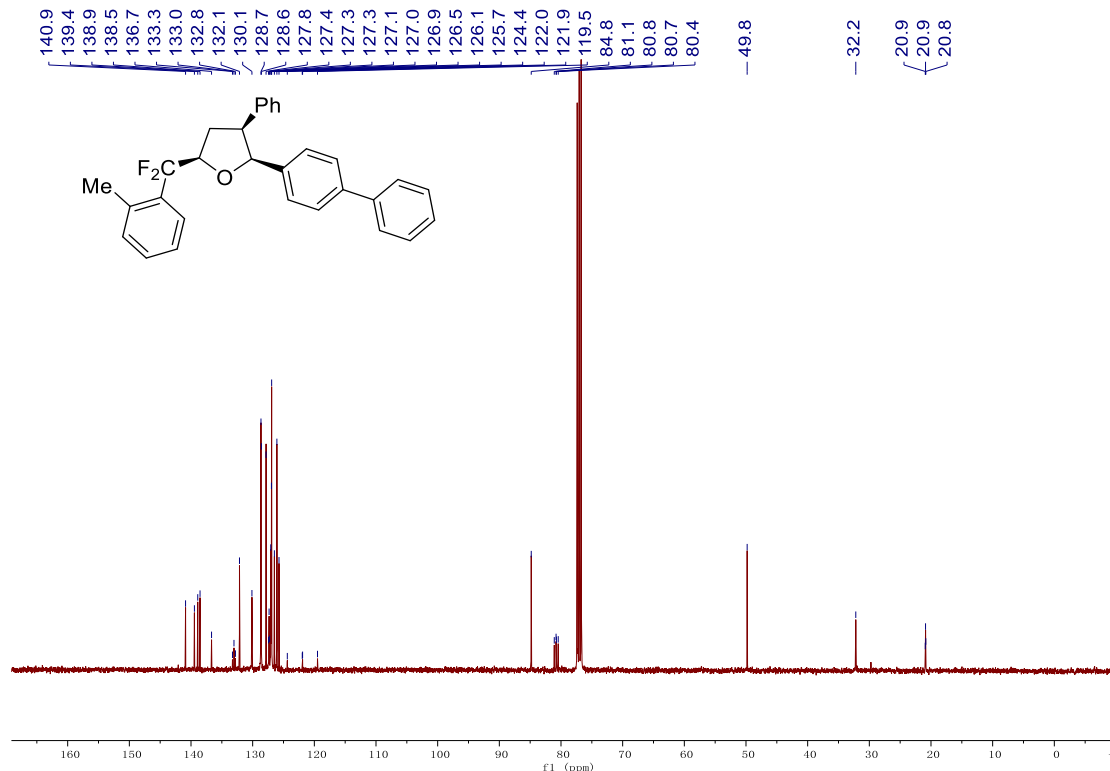

**(-)-(2*S*,3*S*,5*R*)-2-([1,1'-biphenyl]-4-yl)-5-(difluoro(*o*-tolyl)methyl)-3-phenyltetrahydrofuran (7): <sup>19</sup>F NMR (376 MHz, CDCl<sub>3</sub>)**

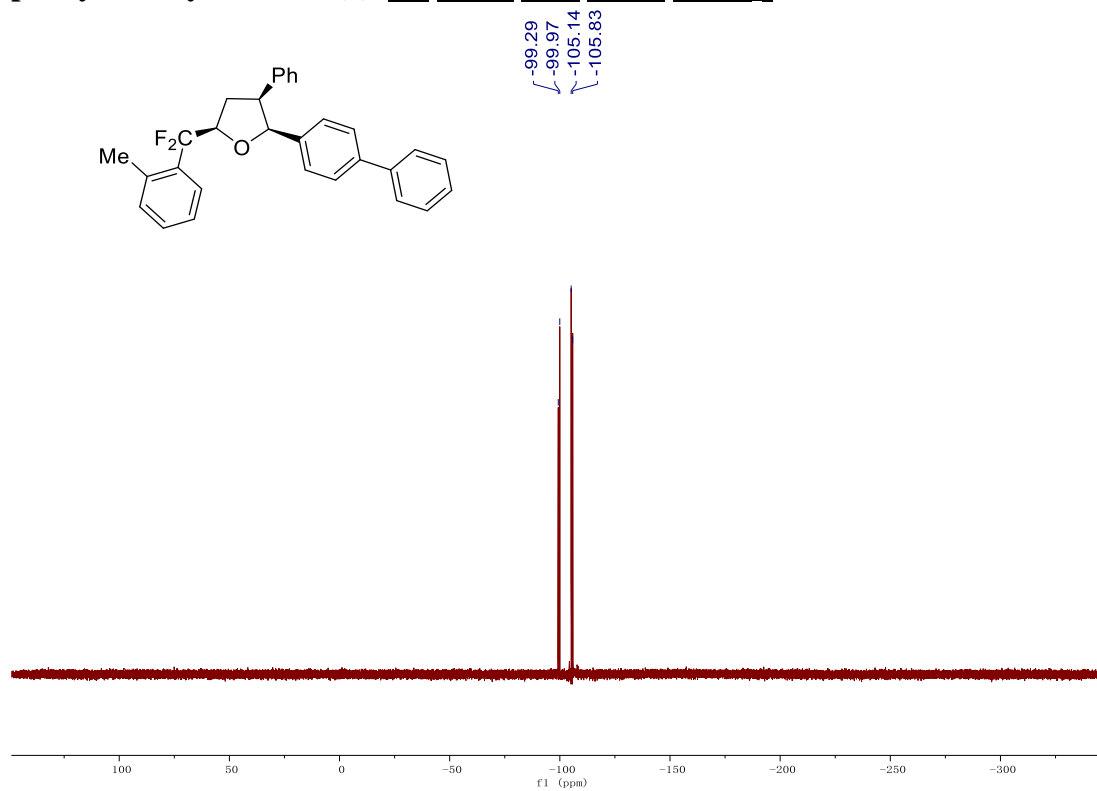

### 13. HPLC Charts

#### (-)-Trimethylamine-(1,1-difluoro-1,4-diphenylbut-3-yn-2-yl)borane (3aa)

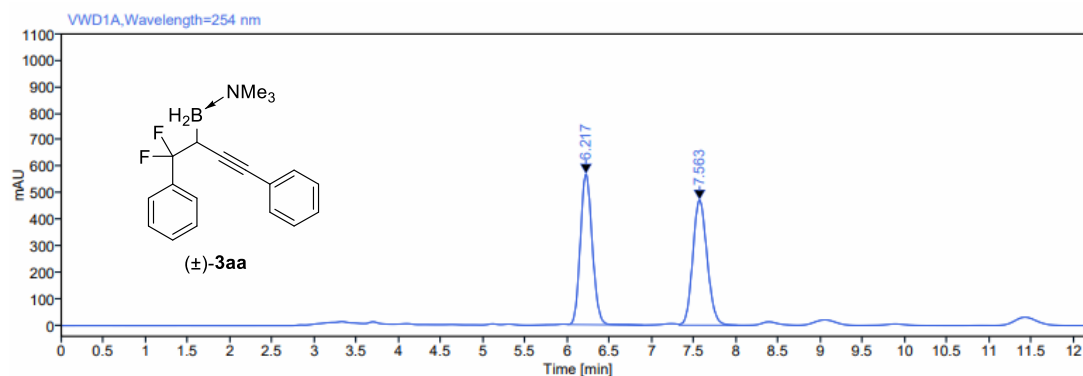

| RT [min] | Type | Width [min] | Area     | Height | Area% |
|----------|------|-------------|----------|--------|-------|
| 6.217    | VB   | 0.89        | 5588.72  | 568.97 | 49.96 |
| 7.563    | VBA  | 0.69        | 5596.64  | 472.62 | 50.04 |
| Sum      |      |             | 11185.36 |        |       |

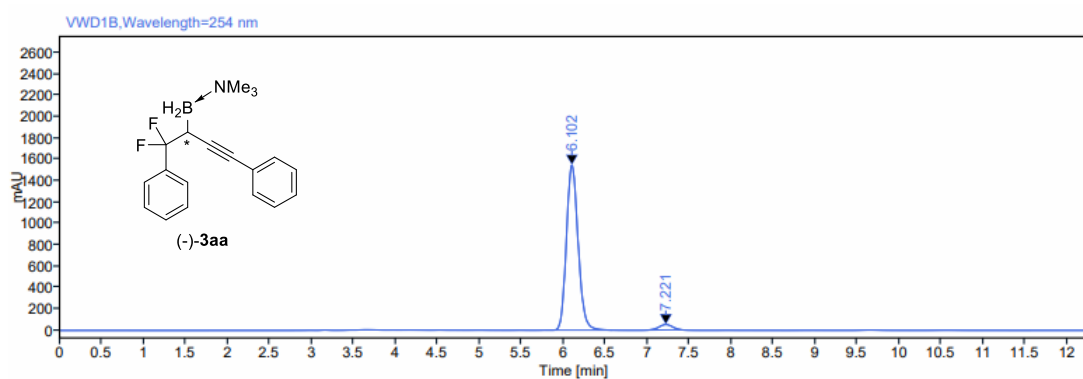

| RT [min] | Type | Width [min] | Area     | Height  | Area% |
|----------|------|-------------|----------|---------|-------|
| 6.102    | MM m | 0.15        | 14994.86 | 1545.98 | 96.42 |
| 7.221    | MM m | 0.17        | 556.17   | 50.56   | 3.58  |
| Sum      |      |             | 15551.03 |         |       |

**(-)-1-methylpyrrolidine-(1,1-difluoro-1,4-diphenylbut-3-yn-2-yl)borane (3ab)**

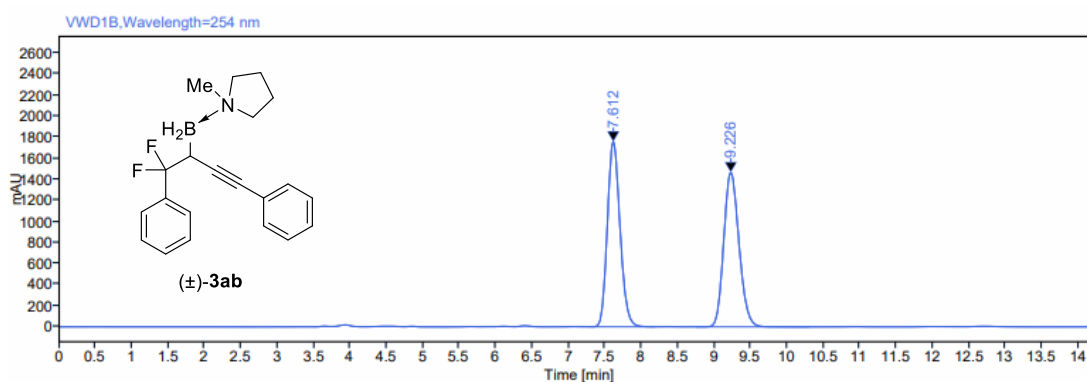

| RT [min] | Type | Width [min] | Area     | Height  | Area% |
|----------|------|-------------|----------|---------|-------|
| 7.612    | BV   | 0.88        | 21292.58 | 1758.06 | 49.89 |
| 9.226    | MB m | 0.23        | 21387.76 | 1466.48 | 50.11 |
| Sum      |      |             | 42680.33 |         |       |

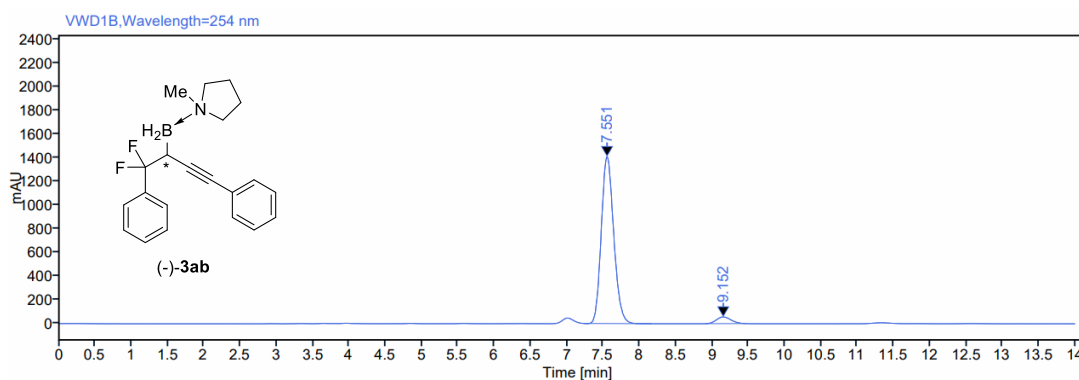

| RT [min] | Type | Width [min] | Area     | Height  | Area% |
|----------|------|-------------|----------|---------|-------|
| 7.551    | MM m | 0.19        | 16774.35 | 1406.40 | 95.56 |
| 9.152    | MM m | 0.22        | 780.06   | 56.41   | 4.44  |
| Sum      |      |             | 17554.40 |         |       |

**(+)-3,5-dimethylpyridine-(1,1-difluoro-1,4-diphenylbut-3-yn-2-yl)borane (3ac)**

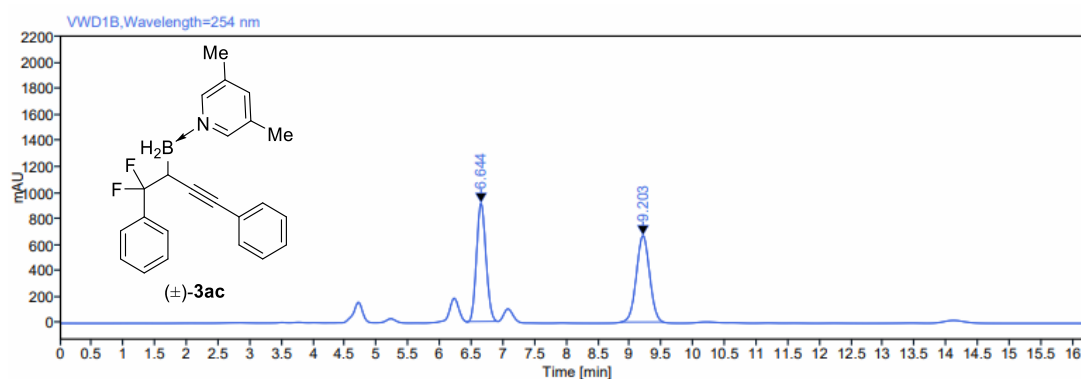

| RT [min] | Type | Width [min] | Area     | Height | Area% |
|----------|------|-------------|----------|--------|-------|
| 6.644    | MM m | 0.16        | 9430.15  | 909.54 | 49.34 |
| 9.203    | BM m | 0.23        | 9683.80  | 664.84 | 50.66 |
| Sum      |      |             | 19113.95 |        |       |

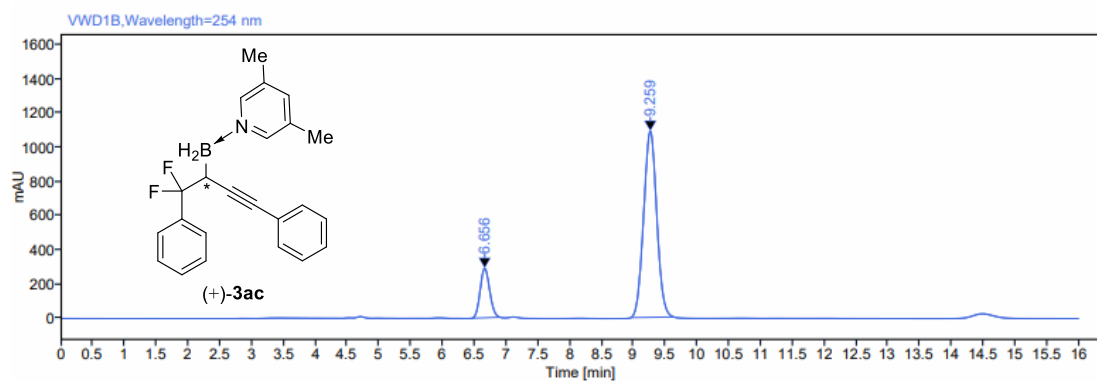

| RT [min] | Type | Width [min] | Area     | Height  | Area% |
|----------|------|-------------|----------|---------|-------|
| 6.656    | BBA  | 0.44        | 2996.40  | 289.75  | 16.10 |
| 9.259    | BBA  | 0.67        | 15609.20 | 1088.18 | 83.90 |
| Sum      |      |             | 18605.60 |         |       |

**(+)-(R)-Trimethylamine-(1,1-difluoro-4-phenyl-1-(*o*-tolyl)but-3-yn-2-yl)borane (3ba)**

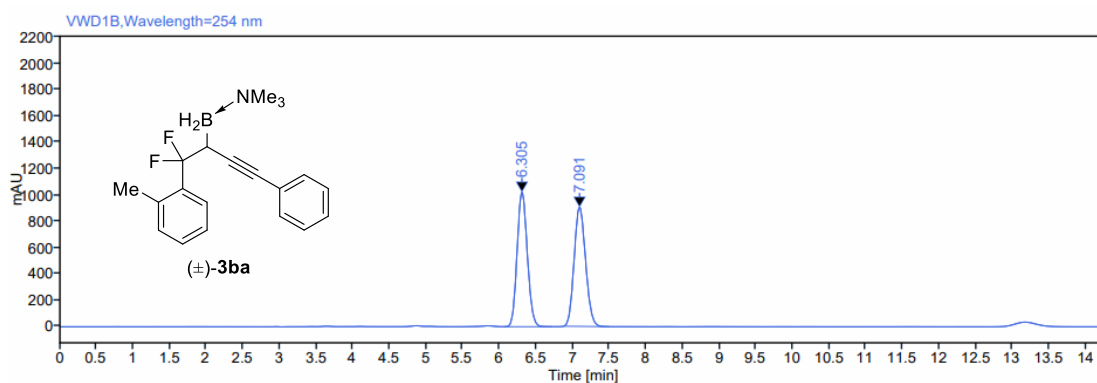

| RT [min] | Type | Width [min] | Area     | Height  | Area% |
|----------|------|-------------|----------|---------|-------|
| 6.305    | BB   | 0.66        | 9909.79  | 1021.86 | 50.08 |
| 7.091    | BBA  | 0.62        | 9878.35  | 904.93  | 49.92 |
| Sum      |      |             | 19788.14 |         |       |

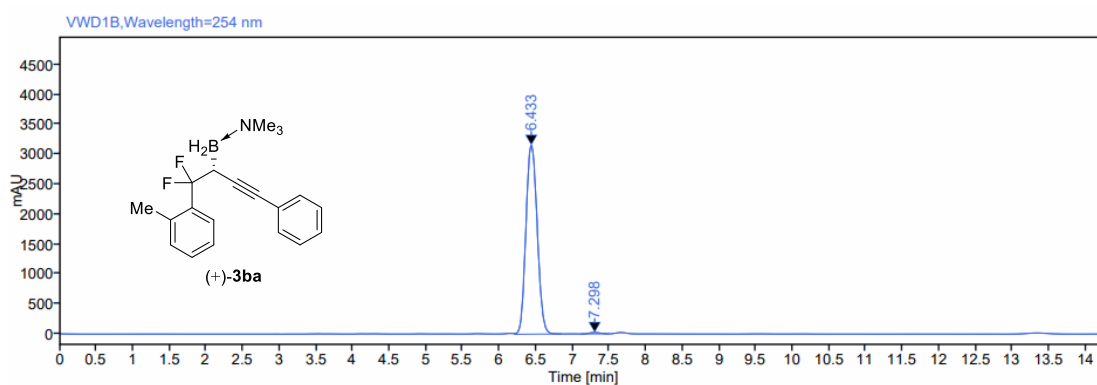

| RT [min] | Type | Width [min] | Area     | Height  | Area% |
|----------|------|-------------|----------|---------|-------|
| 6.433    | MB m | 0.17        | 33833.78 | 3154.37 | 99.30 |
| 7.298    | BB   | 0.38        | 238.41   | 23.16   | 0.70  |
| Sum      |      |             | 34072.19 |         |       |

**(-)-Trimethylamine-(1,1-difluoro-4-phenyl-1-(*m*-tolyl)but-3-yn-2-yl)borane (3ca)**

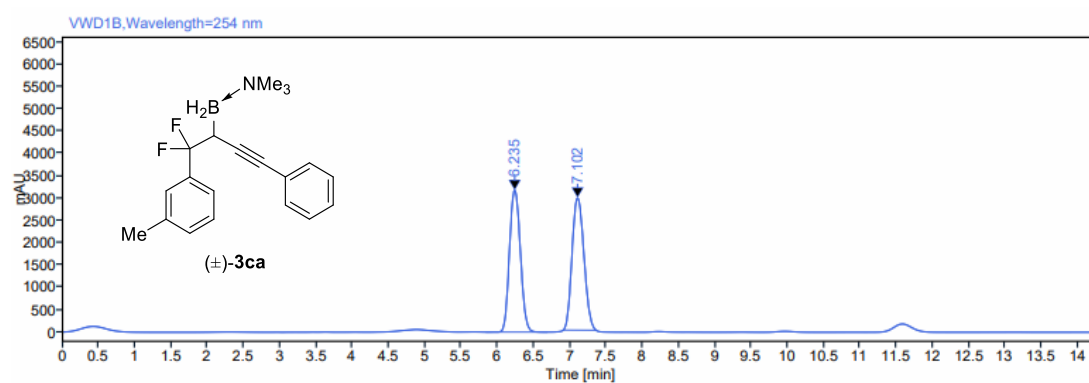

| RT [min] | Type | Width [min] | Area     | Height  | Area% |
|----------|------|-------------|----------|---------|-------|
| 6.235    | MM m | 0.17        | 33328.63 | 3176.45 | 49.64 |
| 7.102    | MM m | 0.18        | 33812.34 | 2963.18 | 50.36 |
| Sum      |      |             | 67140.97 |         |       |

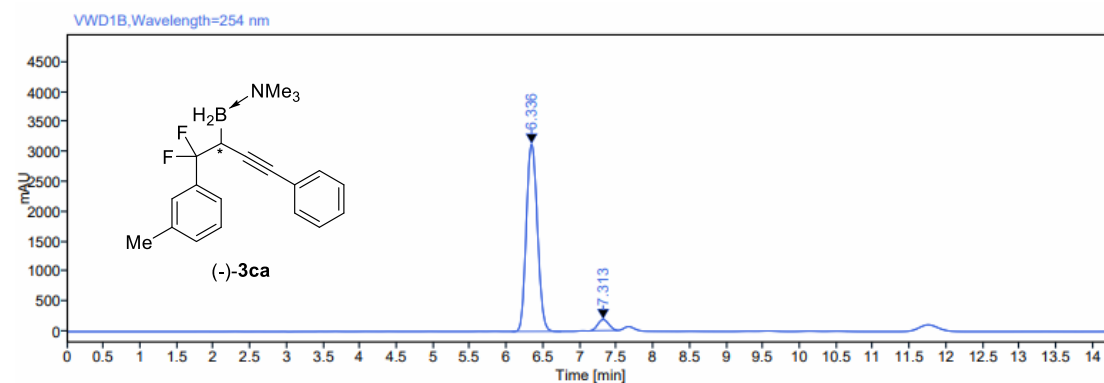

| RT [min] | Type | Width [min] | Area     | Height  | Area% |
|----------|------|-------------|----------|---------|-------|
| 6.336    | BB   | 0.67        | 32946.03 | 3128.23 | 94.59 |
| 7.313    | BBA  | 0.37        | 1885.97  | 183.38  | 5.41  |
| Sum      |      |             | 34832.00 |         |       |



**(+)-Trimethylamine-(1-(2-chlorophenyl)-1,1-difluoro-4-phenylbut-3-yn-2-yl)borane (3da)**

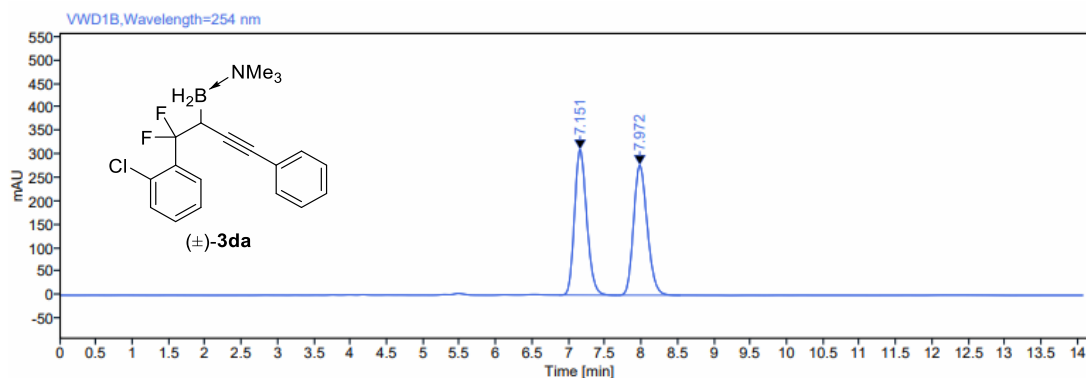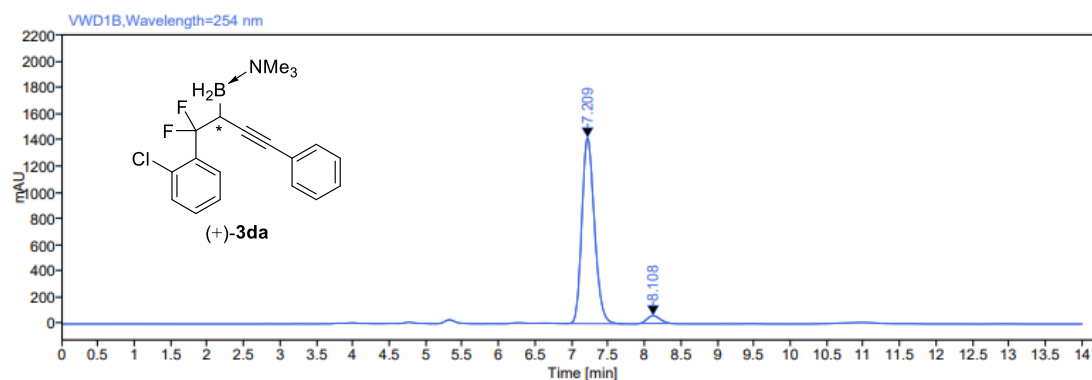

**(-)-Trimethylamine-(1-(3-chlorophenyl)-1,1-difluoro-4-phenylbut-3-yn-2-yl)borane (3ea)**

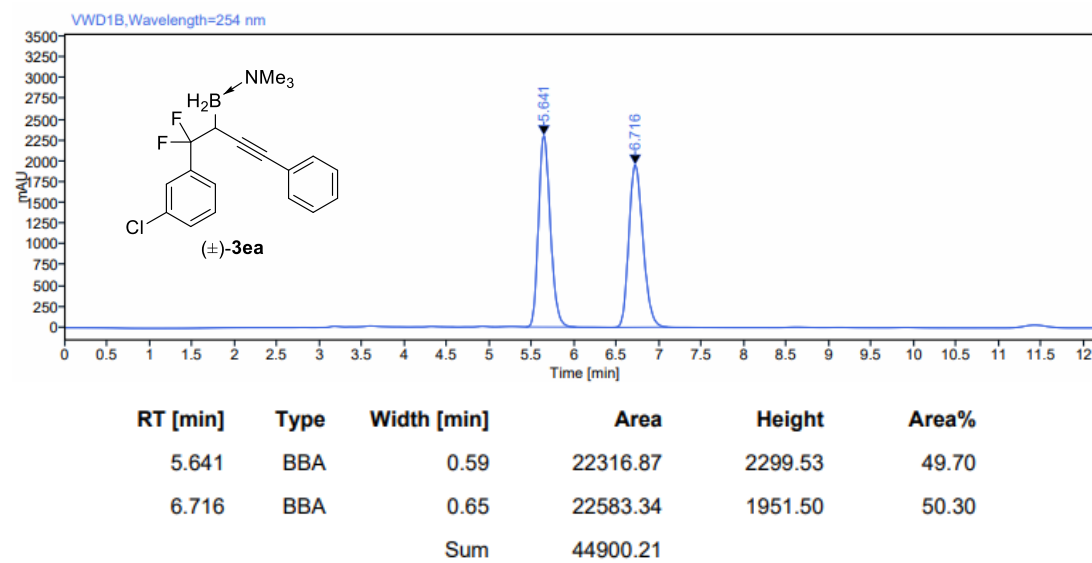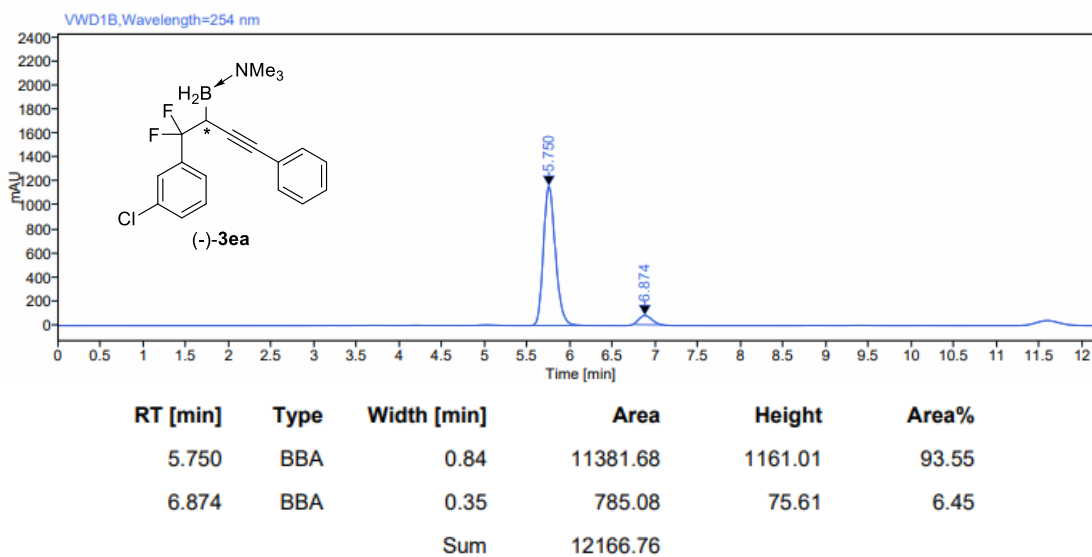

**(-)-(R)-Trimethylamine-(1-(4-chlorophenyl)-1,1-difluoro-4-phenylbut-3-yn-2-yl)borane (3fa)**

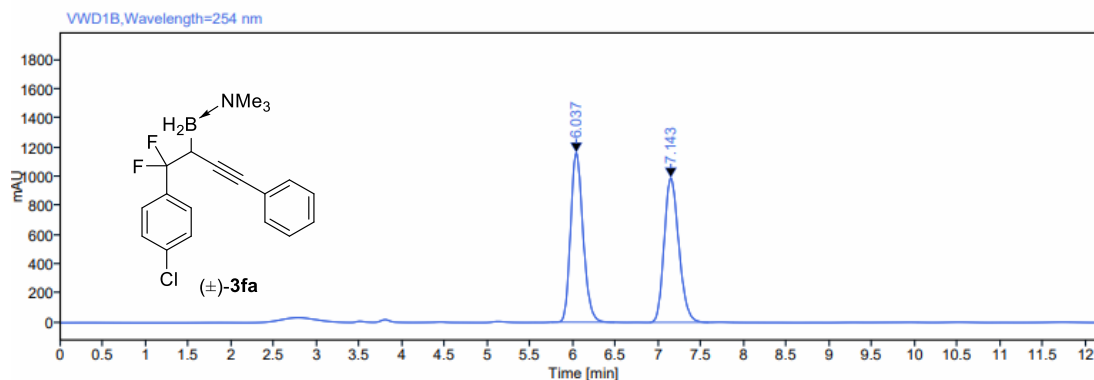

| RT [min] | Type | Width [min] | Area     | Height  | Area% |
|----------|------|-------------|----------|---------|-------|
| 6.037    | BBA  | 0.73        | 11763.00 | 1160.40 | 49.88 |
| 7.143    | BBA  | 0.69        | 11820.55 | 989.67  | 50.12 |
| Sum      |      |             | 23583.55 |         |       |

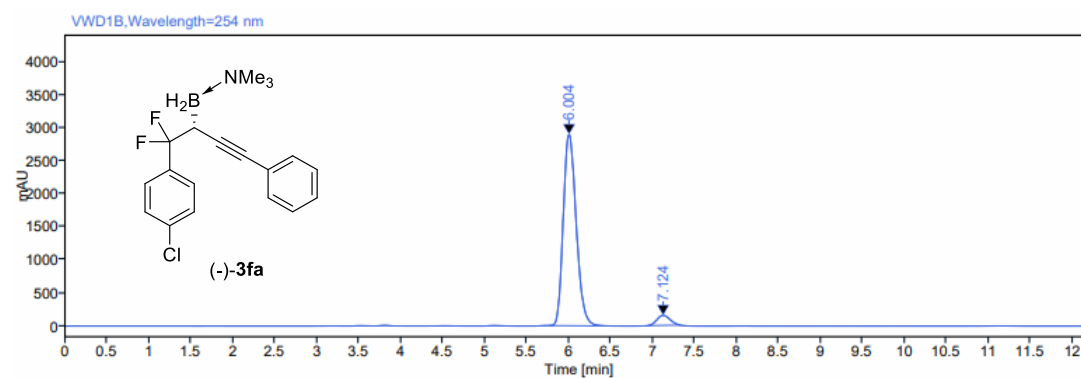

| RT [min] | Type | Width [min] | Area     | Height  | Area% |
|----------|------|-------------|----------|---------|-------|
| 6.004    | BBA  | 0.71        | 31073.23 | 2899.40 | 94.96 |
| 7.124    | BBA  | 0.38        | 1650.54  | 151.80  | 5.04  |
| Sum      |      |             | 32723.77 |         |       |

**(+)-Trimethylamine-(1,1-difluoro-1-(2-fluorophenyl)-4-phenylbut-3-yn-2-yl)borane (3ga)**

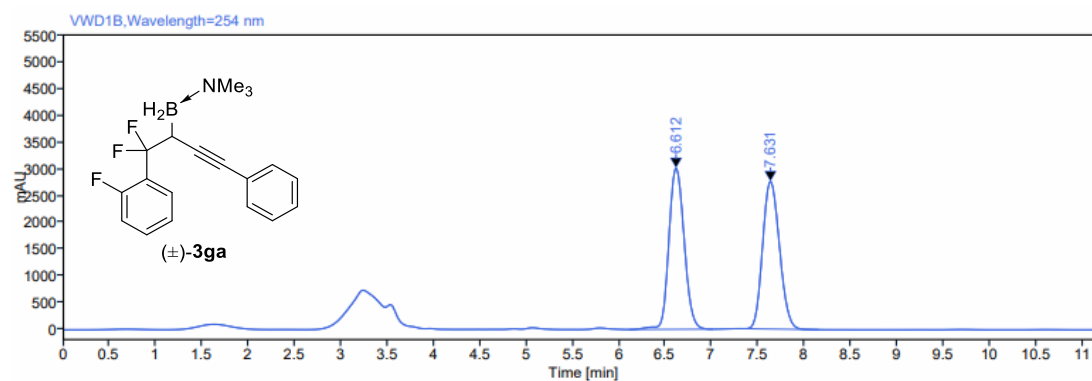

| RT [min] | Type | Width [min] | Area     | Height  | Area% |
|----------|------|-------------|----------|---------|-------|
| 6.612    | BB   | 0.91        | 34650.28 | 3010.02 | 49.82 |
| 7.631    | BBA  | 0.80        | 34900.50 | 2755.25 | 50.18 |
| Sum      |      |             | 69550.79 |         |       |

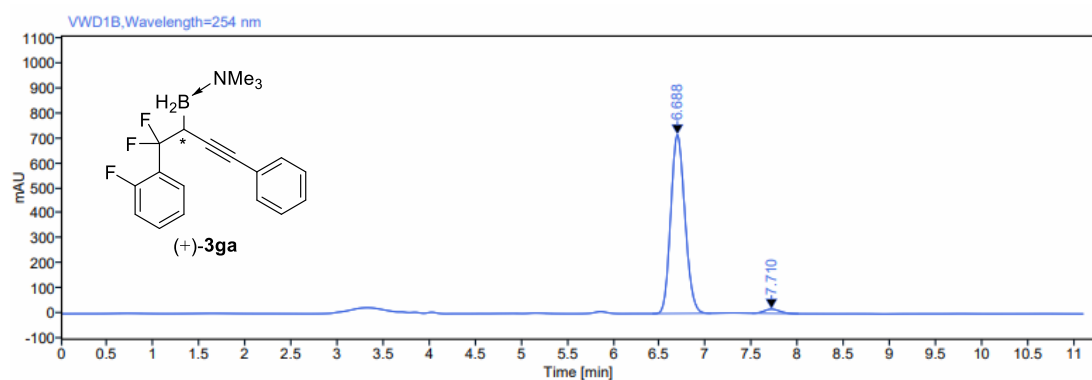

| RT [min] | Type | Width [min] | Area    | Height | Area% |
|----------|------|-------------|---------|--------|-------|
| 6.688    | BB   | 0.64        | 7654.25 | 712.94 | 97.47 |
| 7.710    | BBA  | 0.51        | 198.89  | 17.04  | 2.53  |
| Sum      |      |             | 7853.14 |        |       |

**(+)-Trimethylamine-(1,1-difluoro-1-(naphthalen-1-yl)-4-phenylbut-3-yn-2-yl)borane (3ha)**

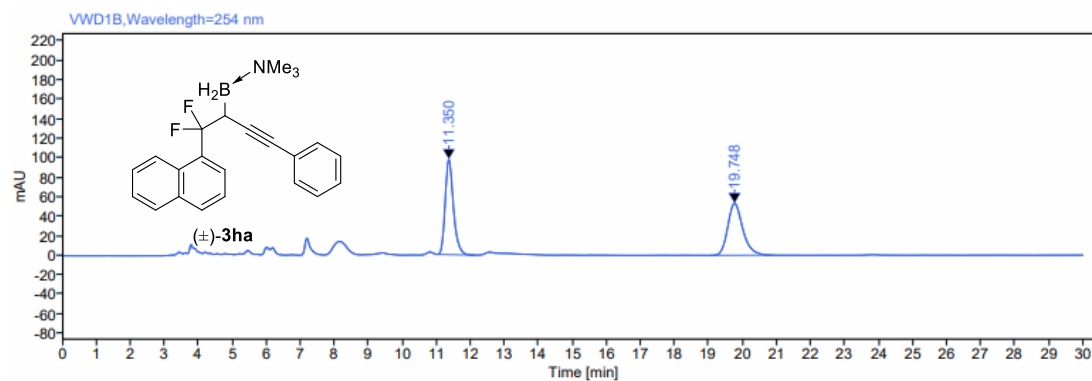

| RT [min] | Type | Width [min] | Area    | Height | Area% |
|----------|------|-------------|---------|--------|-------|
| 11.350   | BB   | 1.11        | 1649.34 | 97.62  | 50.15 |
| 19.748   | BBA  | 1.84        | 1639.78 | 53.24  | 49.85 |
| Sum      |      |             | 3289.13 |        |       |

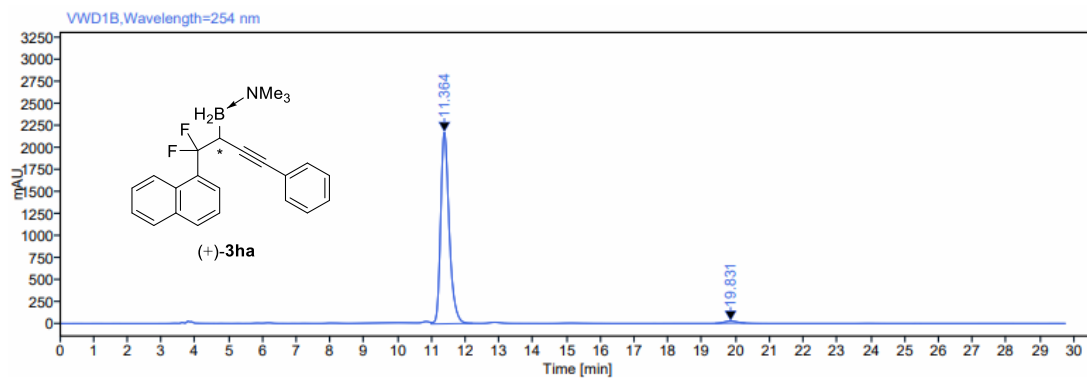

| RT [min] | Type | Width [min] | Area     | Height  | Area% |
|----------|------|-------------|----------|---------|-------|
| 11.364   | MB m | 0.27        | 38290.84 | 2176.05 | 98.39 |
| 19.831   | BBA  | 0.89        | 627.71   | 23.99   | 1.61  |
| Sum      |      |             | 38918.55 |         |       |

**(-)-Trimethylamine-(1,1-difluoro-1-(4-nitrophenyl)-4-phenylbut-3-yn-2-yl)borane (3ia)**

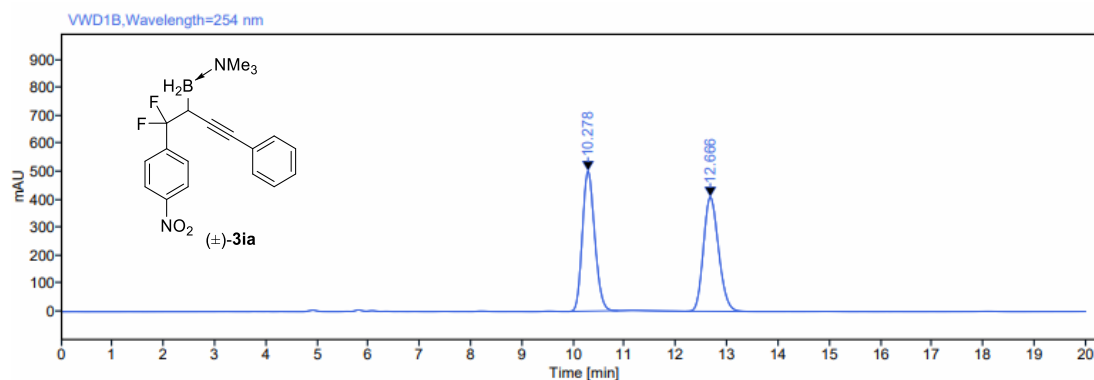

| RT [min] | Type | Width [min] | Area     | Height | Area% |
|----------|------|-------------|----------|--------|-------|
| 10.278   | BB   | 0.98        | 8389.13  | 500.06 | 49.92 |
| 12.666   | BBA  | 1.23        | 8416.26  | 408.33 | 50.08 |
| Sum      |      |             | 16805.40 |        |       |

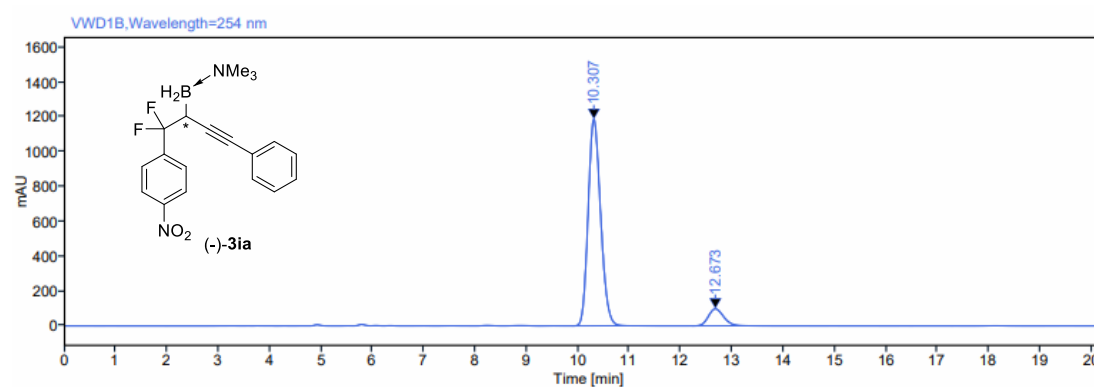

| RT [min] | Type | Width [min] | Area     | Height  | Area% |
|----------|------|-------------|----------|---------|-------|
| 10.307   | BBA  | 1.05        | 20001.72 | 1186.89 | 90.90 |
| 12.673   | BBA  | 1.07        | 2002.21  | 97.63   | 9.10  |
| Sum      |      |             | 22003.93 |         |       |

**(+)-Trimethylamine-(1,1-difluoro-1,4-di-*o*-tolylbut-3-yn-2-yl)borane (3ja)**

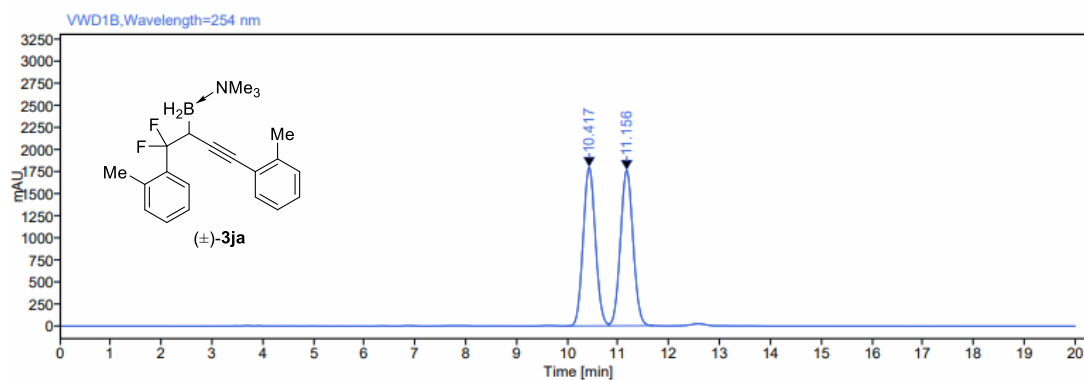

| RT [min] | Type | Width [min] | Area     | Height  | Area% |
|----------|------|-------------|----------|---------|-------|
| 10.417   | BV   | 0.84        | 30116.20 | 1797.32 | 49.70 |
| 11.156   | VBA  | 0.88        | 30473.81 | 1760.34 | 50.30 |
| Sum      |      |             | 60590.01 |         |       |

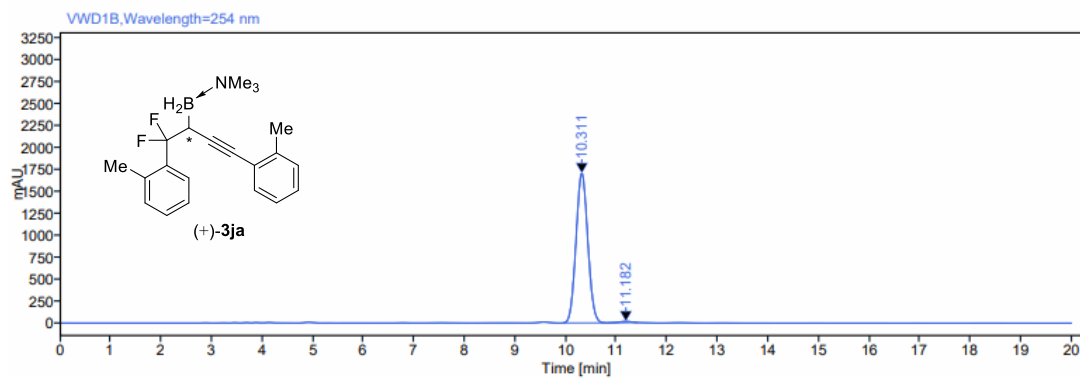

| RT [min] | Type | Width [min] | Area     | Height  | Area% |
|----------|------|-------------|----------|---------|-------|
| 10.311   | BB   | 0.86        | 27571.40 | 1704.96 | 99.11 |
| 11.182   | BBA  | 0.61        | 247.71   | 14.64   | 0.89  |
| Sum      |      |             | 27819.11 |         |       |

**(+)-Trimethylamine-(1,1-difluoro-4-(*m*-tolyl)-1-(*o*-tolyl)but-3-yn-2-yl)borane  
(3ka)**

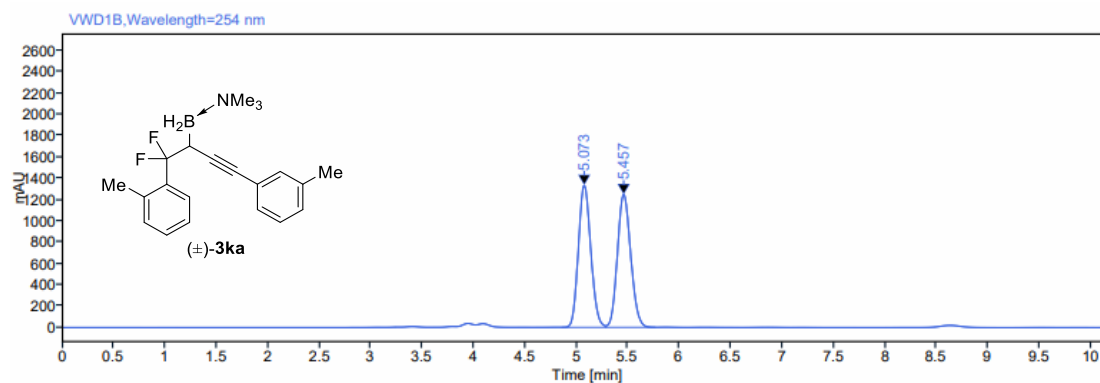

| RT [min] | Type | Width [min] | Area     | Height  | Area% |
|----------|------|-------------|----------|---------|-------|
| 5.073    | VV   | 0.43        | 11201.26 | 1335.33 | 49.93 |
| 5.457    | VB   | 0.48        | 11233.39 | 1248.33 | 50.07 |
| Sum      |      |             | 22434.64 |         |       |

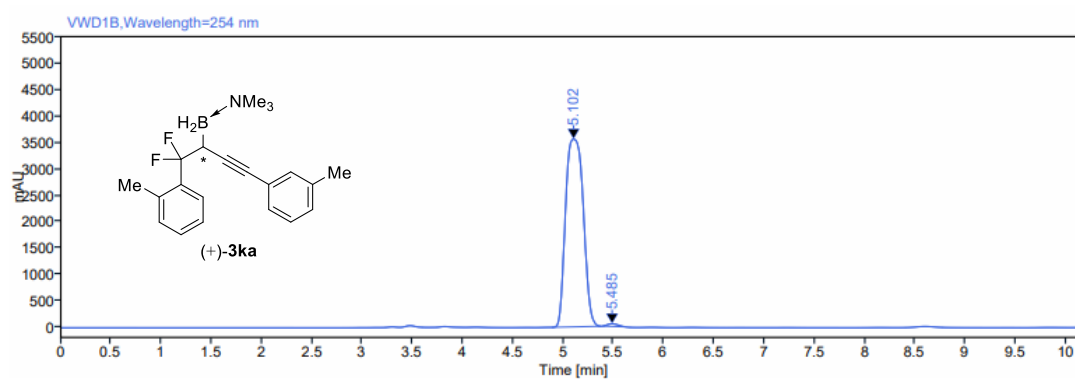

| RT [min] | Type | Width [min] | Area     | Height  | Area% |
|----------|------|-------------|----------|---------|-------|
| 5.102    | BBA  | 0.49        | 43533.56 | 3549.70 | 99.18 |
| 5.485    | BBA  | 0.22        | 358.80   | 49.35   | 0.82  |
| Sum      |      |             | 43892.36 |         |       |



**(+)-Trimethylamine-(1,1-difluoro-1-(*o*-tolyl)-4-(*p*-tolyl)but-3-yn-2-yl)borane (3la)**

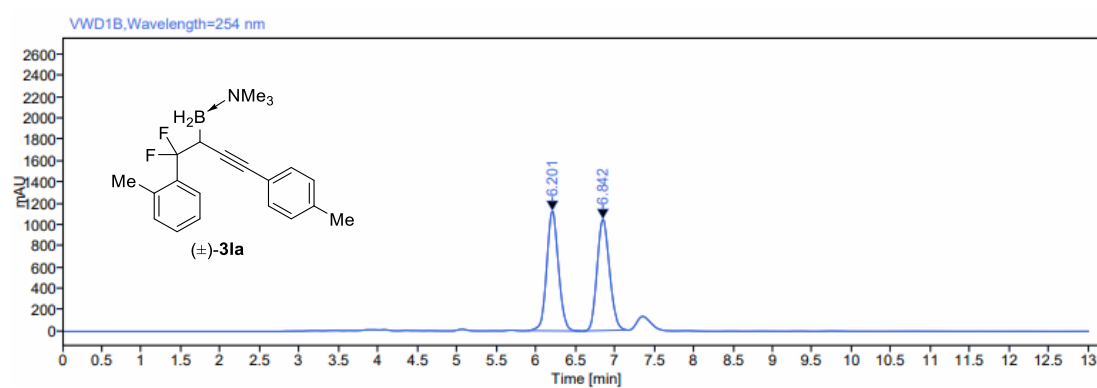

| RT [min] | Type | Width [min] | Area     | Height  | Area% |
|----------|------|-------------|----------|---------|-------|
| 6.201    | BB   | 0.67        | 11665.13 | 1125.30 | 50.37 |
| 6.842    | BBA  | 0.55        | 11492.75 | 1046.10 | 49.63 |
| Sum      |      |             | 23157.88 |         |       |

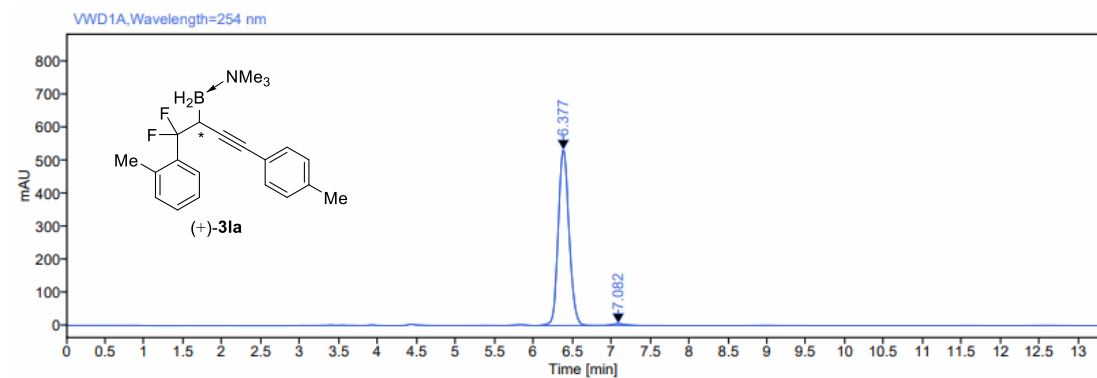

| RT [min] | Type | Width [min] | Area    | Height | Area% |
|----------|------|-------------|---------|--------|-------|
| 6.377    | BB   | 0.74        | 5143.07 | 531.15 | 98.96 |
| 7.082    | BBA  | 0.38        | 54.05   | 5.23   | 1.04  |
| Sum      |      |             | 5197.12 |        |       |

**(+)-Trimethylamine-(4-(2-chlorophenyl)-1,1-difluoro-1-(*o*-tolyl)but-3-yn-2-yl)borane (3ma)**

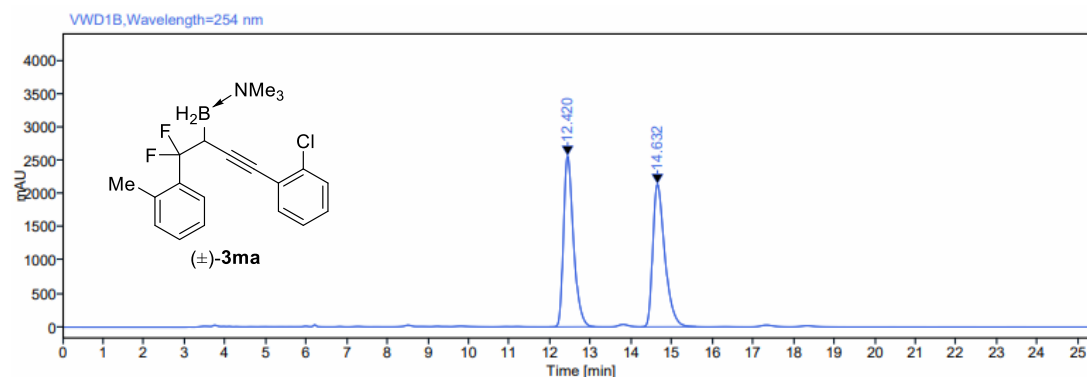

| RT [min] | Type | Width [min] | Area     | Height  | Area% |
|----------|------|-------------|----------|---------|-------|
| 12.420   | BBA  | 1.12        | 43927.95 | 2566.23 | 49.81 |
| 14.632   | BBA  | 1.36        | 44267.14 | 2141.89 | 50.19 |
| Sum      |      |             | 88195.10 |         |       |

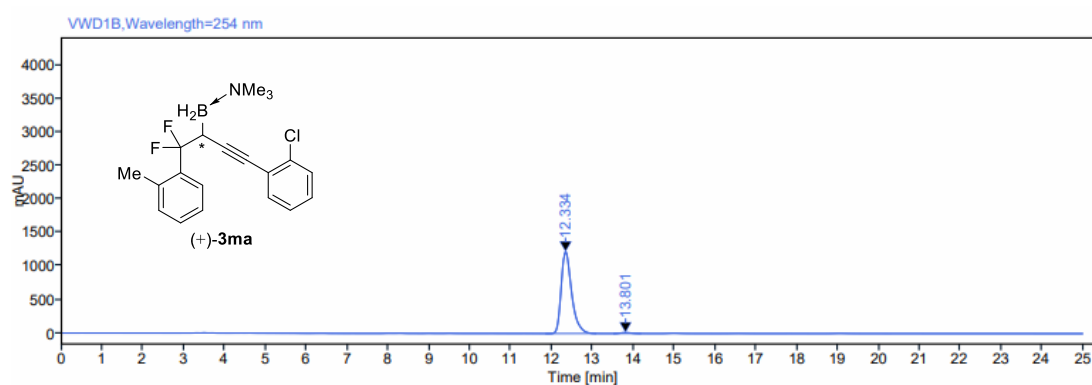

| RT [min] | Type | Width [min] | Area     | Height  | Area% |
|----------|------|-------------|----------|---------|-------|
| 12.334   | BBA  | 1.25        | 21653.09 | 1219.80 | 98.97 |
| 13.801   | BBA  | 0.68        | 226.12   | 12.89   | 1.03  |
| Sum      |      |             | 21879.21 |         |       |

**(+)-Trimethylamine-(4-(3-chlorophenyl)-1,1-difluoro-1-(*o*-tolyl)but-3-yn-2-yl)borane (3na)**

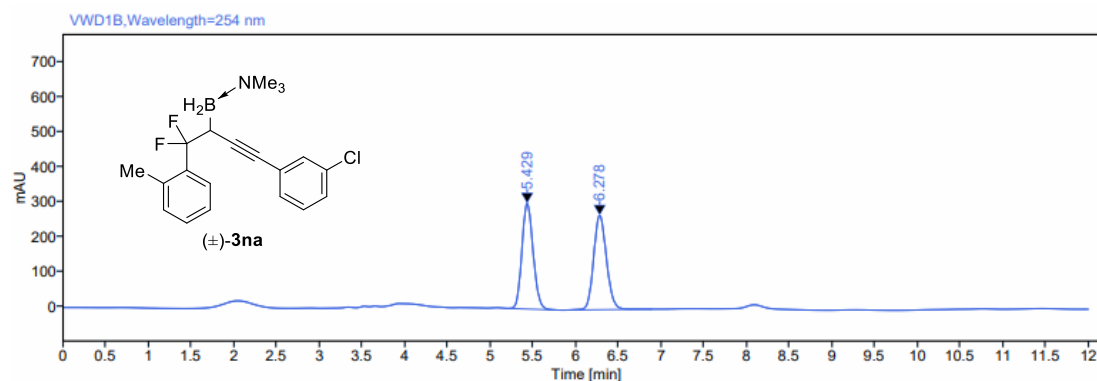

| RT [min] | Type | Width [min] | Area    | Height | Area% |
|----------|------|-------------|---------|--------|-------|
| 5.429    | BB   | 0.57        | 2755.97 | 301.34 | 49.35 |
| 6.278    | BBA  | 1.03        | 2828.03 | 268.91 | 50.65 |
| Sum      |      |             | 5584.00 |        |       |

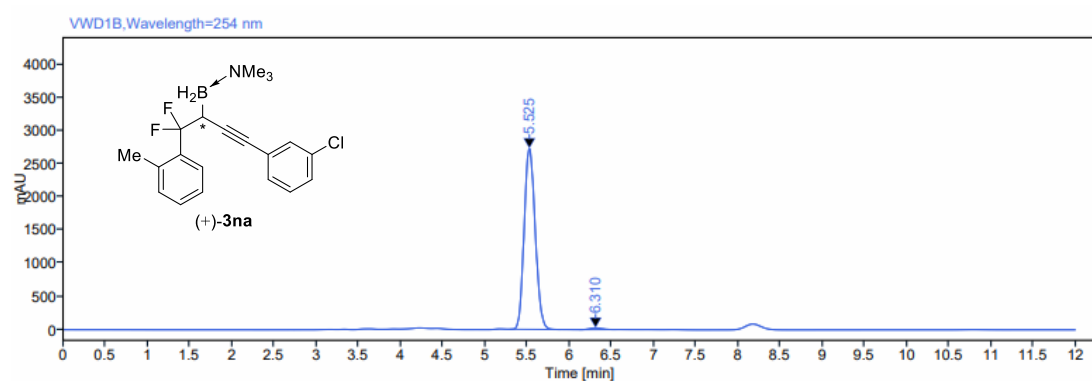

| RT [min] | Type | Width [min] | Area     | Height  | Area% |
|----------|------|-------------|----------|---------|-------|
| 5.525    | BB   | 0.60        | 24904.59 | 2730.83 | 99.02 |
| 6.310    | BB   | 0.44        | 246.78   | 25.40   | 0.98  |
| Sum      |      |             | 25151.37 |         |       |

**(+)-Trimethylamine-(4-(4-chlorophenyl)-1,1-difluoro-1-(*o*-tolyl)but-3-yn-2-yl)borane (3oa)**

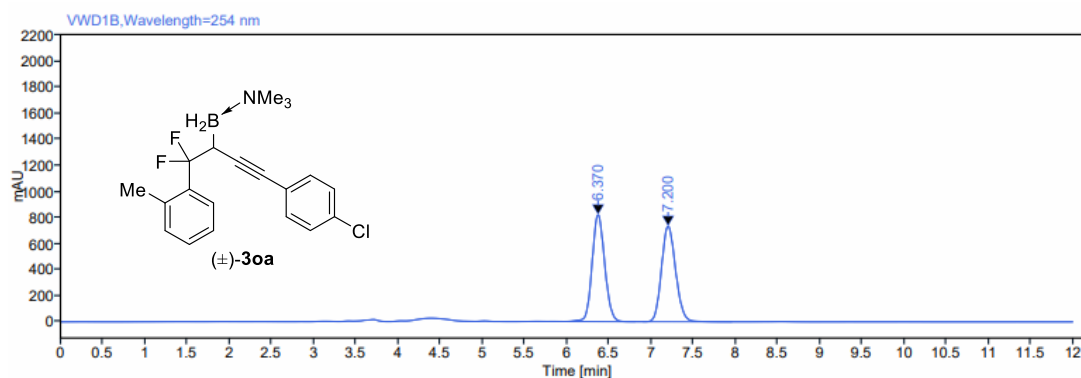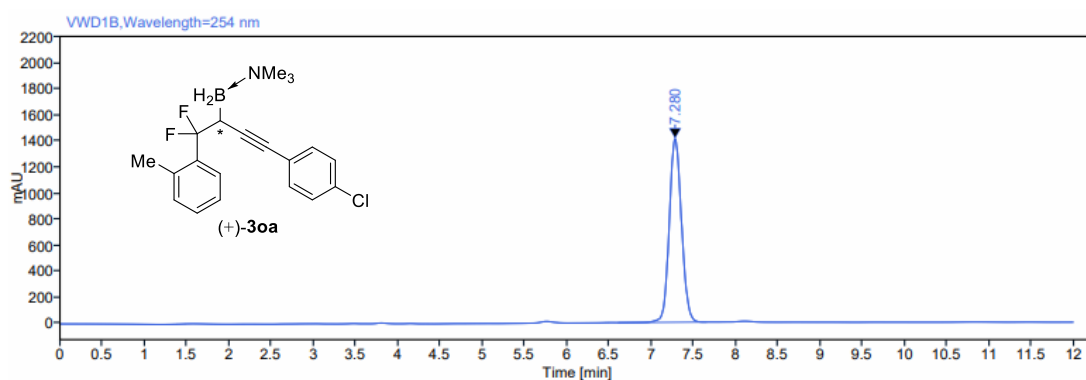

**(+)-Trimethylamine-(1,1-difluoro-4-(3-fluorophenyl)-1-(*o*-tolyl)but-3-yn-2-yl)borane (3pa)**

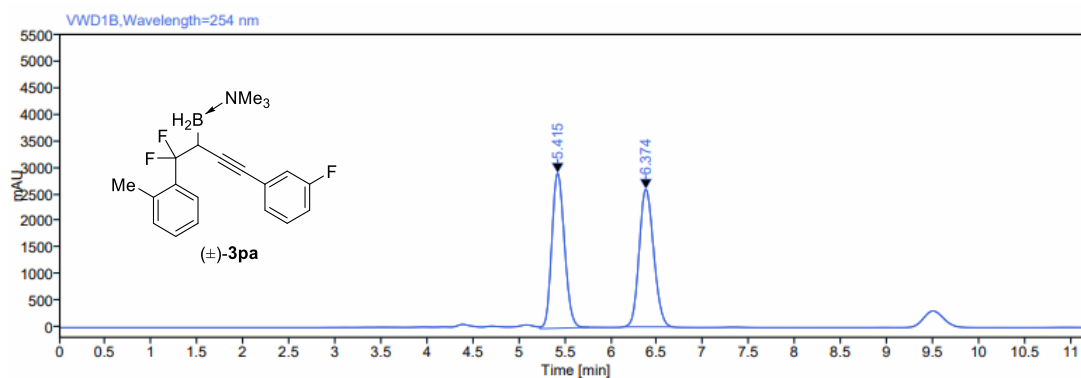

| RT [min] | Type | Width [min] | Area     | Height  | Area% |
|----------|------|-------------|----------|---------|-------|
| 5.415    | MB m | 0.15        | 27904.88 | 2910.89 | 49.58 |
| 6.374    | BBA  | 0.53        | 28376.99 | 2583.50 | 50.42 |
| Sum      |      |             | 56281.87 |         |       |

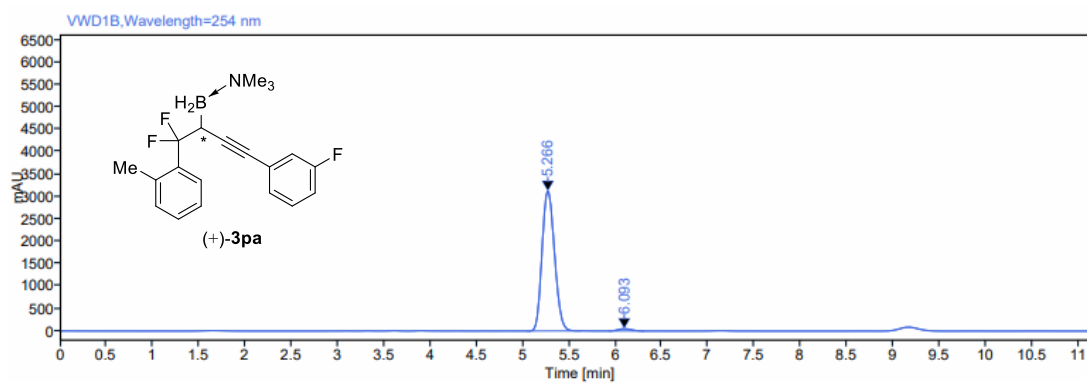

| RT [min] | Type | Width [min] | Area     | Height  | Area% |
|----------|------|-------------|----------|---------|-------|
| 5.266    | BBA  | 0.58        | 29311.52 | 3120.41 | 98.33 |
| 6.093    | BBA  | 0.39        | 498.65   | 51.61   | 1.67  |
| Sum      |      |             | 29810.17 |         |       |

**(+)-Trimethylamine-(1,1-difluoro-1-(*o*-tolyl)-4-(4-(trifluoromethyl)phenyl)but-3-yn-2-yl)borane (3qa)**

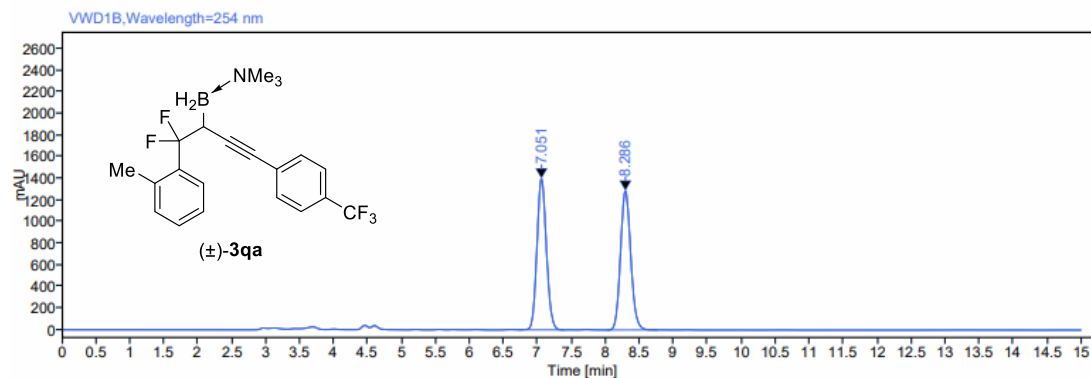

| RT [min] | Type | Width [min] | Area     | Height  | Area% |
|----------|------|-------------|----------|---------|-------|
| 7.051    | BB   | 0.67        | 13517.74 | 1398.00 | 50.05 |
| 8.286    | BB   | 0.75        | 13491.62 | 1286.21 | 49.95 |
| Sum      |      |             | 27009.35 |         |       |

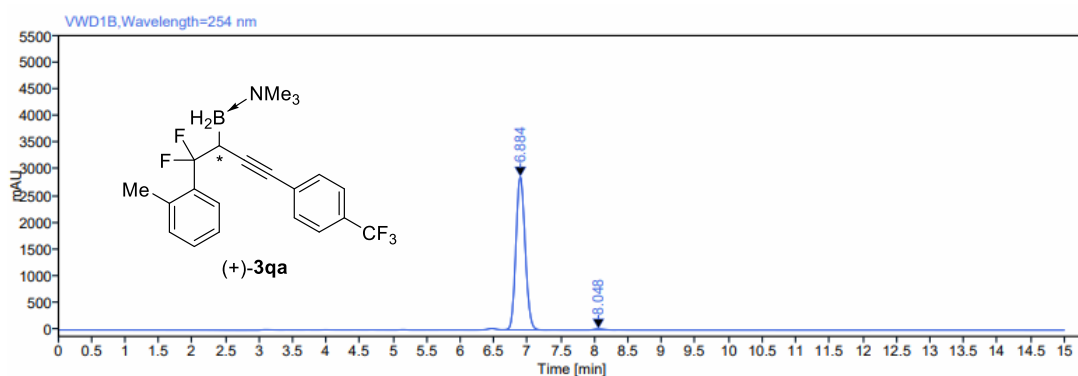

| RT [min] | Type | Width [min] | Area     | Height  | Area% |
|----------|------|-------------|----------|---------|-------|
| 6.884    | BB   | 0.67        | 27378.80 | 2857.51 | 99.36 |
| 8.048    | BBA  | 0.41        | 177.66   | 18.39   | 0.64  |
| Sum      |      |             | 27556.46 |         |       |

**(-)-Trimethylamine-(1,1-difluoro-4-(naphthalen-1-yl)-1-(*o*-tolyl)but-3-yn-2-yl)borane (3ra)**

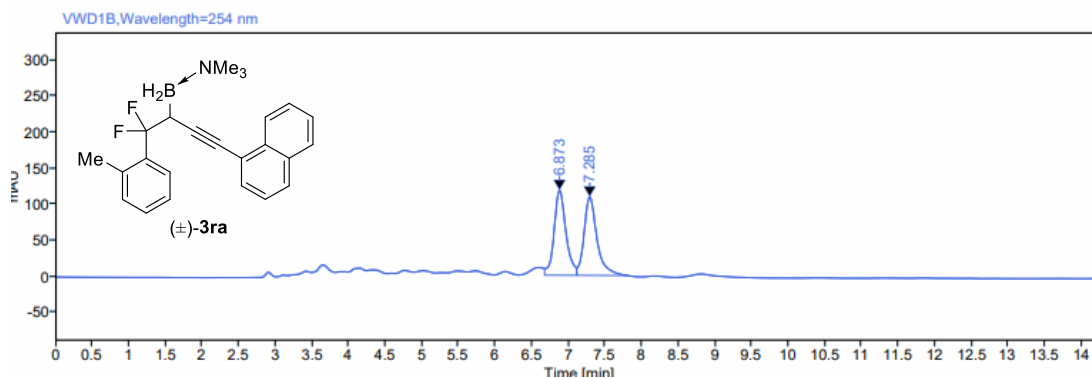

| RT [min] | Type | Width [min] | Area    | Height | Area% |
|----------|------|-------------|---------|--------|-------|
| 6.873    | MM m | 0.17        | 1323.35 | 117.59 | 49.71 |
| 7.285    | MB m | 0.18        | 1338.76 | 108.83 | 50.29 |
| Sum      |      |             | 2662.11 |        |       |

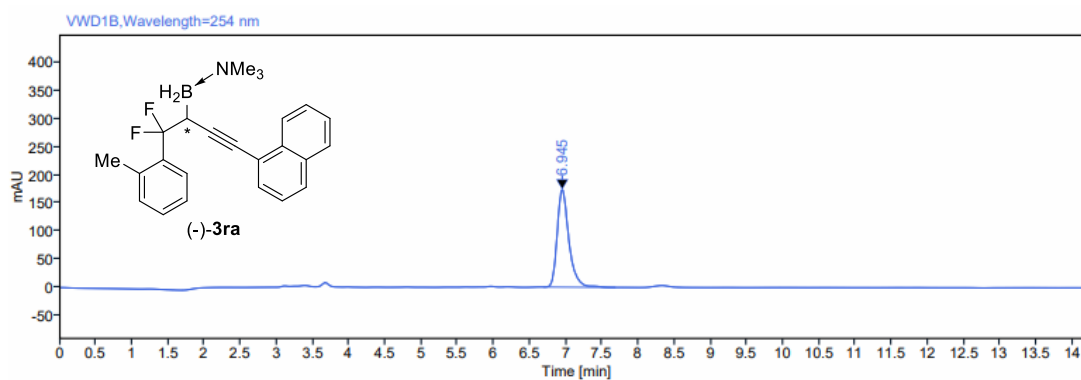

| RT [min] | Type | Width [min] | Area    | Height | Area%  |
|----------|------|-------------|---------|--------|--------|
| 6.945    | BBA  | 1.00        | 1947.51 | 172.77 | 100.00 |
| Sum      |      |             | 1947.51 |        |        |

**(+)-Trimethylamine-(1,1-difluoro-4-(thiophen-2-yl)-1-(*o*-tolyl)but-3-yn-2-yl)borane (3sa)**

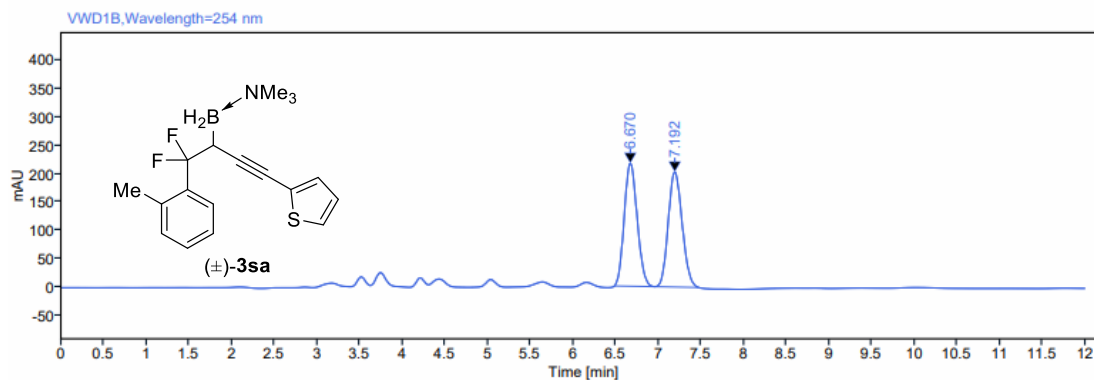

| RT [min] | Type | Width [min] | Area    | Height | Area% |
|----------|------|-------------|---------|--------|-------|
| 6.670    | BB   | 0.47        | 2278.90 | 215.97 | 49.85 |
| 7.192    | BBA  | 0.51        | 2292.78 | 201.99 | 50.15 |
| Sum      |      |             | 4571.68 |        |       |

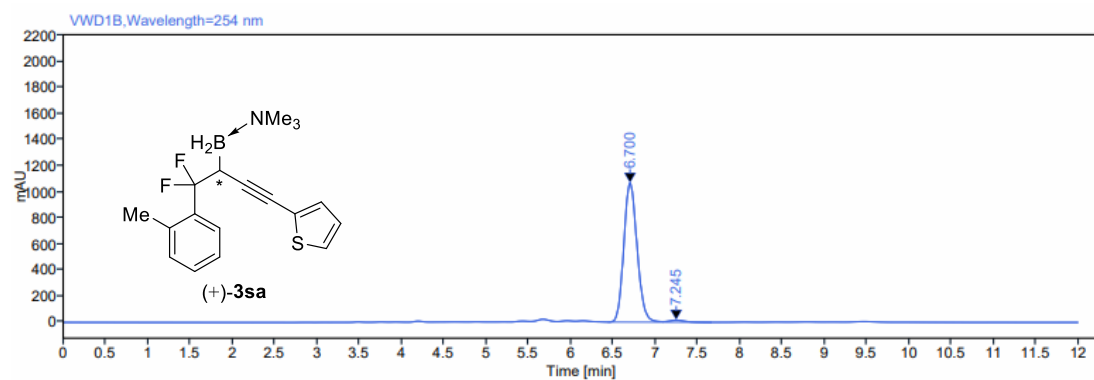

| RT [min] | Type | Width [min] | Area     | Height  | Area% |
|----------|------|-------------|----------|---------|-------|
| 6.700    | BV   | 0.65        | 11661.58 | 1067.06 | 98.30 |
| 7.245    | VB   | 0.58        | 202.02   | 15.91   | 1.70  |
| Sum      |      |             | 11863.60 |         |       |



**(-)-Trimethylamine-(4,4-difluoro-1-(naphthalen-1-yl)pent-1-yn-3-yl) borane (3ta)**

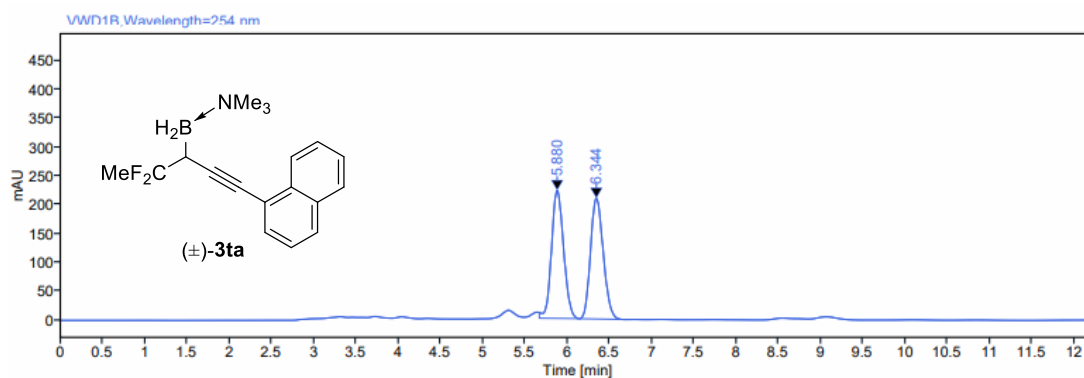

| RT [min] | Type | Width [min] | Area    | Height | Area% |
|----------|------|-------------|---------|--------|-------|
| 5.880    | MB m | 0.16        | 2211.73 | 221.76 | 50.19 |
| 6.344    | BBA  | 0.51        | 2195.18 | 209.39 | 49.81 |
|          | Sum  |             | 4406.92 |        |       |

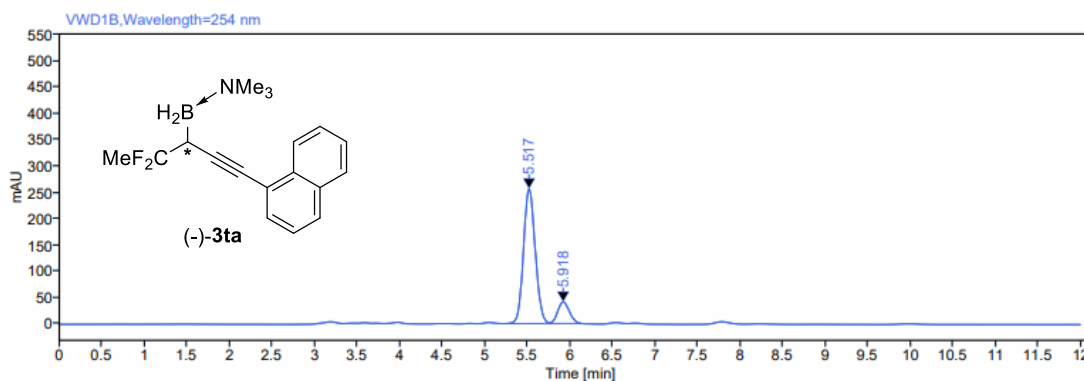

| RT [min] | Type | Width [min] | Area    | Height | Area% |
|----------|------|-------------|---------|--------|-------|
| 5.517    | BV   | 0.52        | 2455.30 | 256.16 | 86.34 |
| 5.918    | VBA  | 0.37        | 388.59  | 40.79  | 13.66 |
|          | Sum  |             | 2843.90 |        |       |

**(-)-(S)-5,5-difluoro-2-phenyl-5-(*o*-tolyl)penta-2,3-dien-1-ol (5a)**

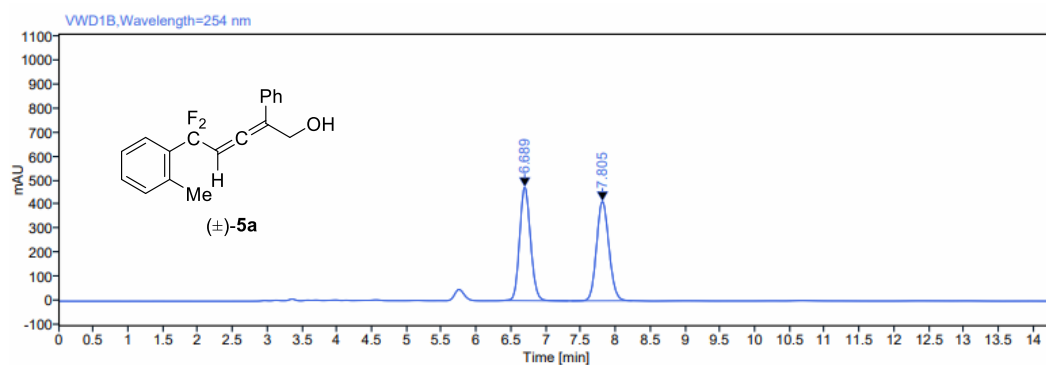

| RT [min] | Type | Width [min] | Area     | Height | Area% |
|----------|------|-------------|----------|--------|-------|
| 6.689    | BB   | 0.95        | 5129.04  | 470.22 | 50.08 |
| 7.805    | BBA  | 0.87        | 5113.37  | 411.88 | 49.92 |
| Sum      |      |             | 10242.41 |        |       |

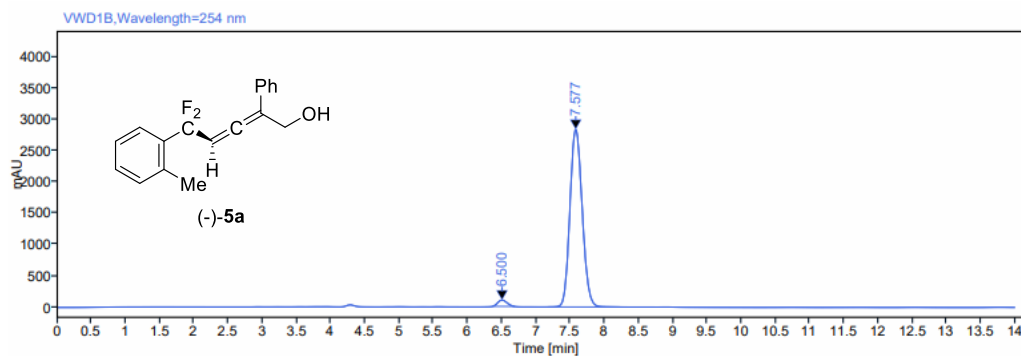

| RT [min] | Type | Width [min] | Area     | Height  | Area% |
|----------|------|-------------|----------|---------|-------|
| 6.500    | BBA  | 0.32        | 946.34   | 100.92  | 2.60  |
| 7.577    | BBA  | 1.05        | 35422.93 | 2838.73 | 97.40 |
| Sum      |      |             | 36369.27 |         |       |

**(-)-(1*R*,3*S*)-1-([1,1'-biphenyl]-4-yl)-5,5-difluoro-2-phenyl-5-(*o*-tolyl)penta-2,3-dien-1-ol (5b)**

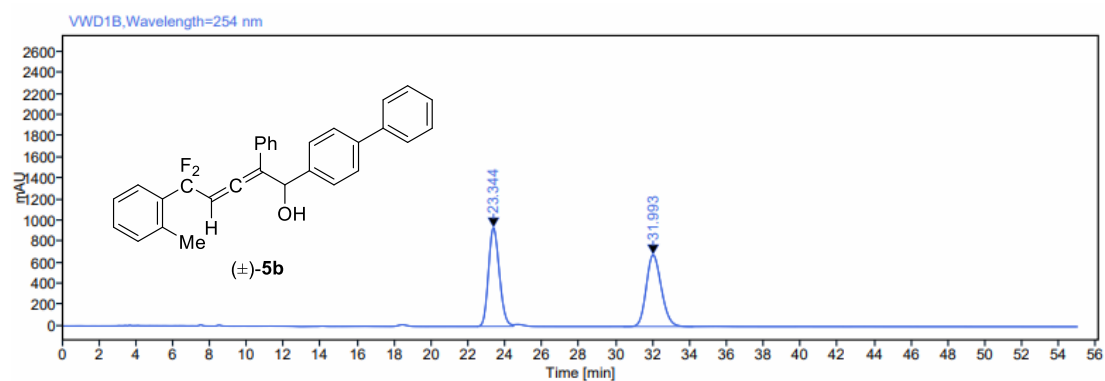

| RT [min] | Type | Width [min] | Area     | Height | Area% |
|----------|------|-------------|----------|--------|-------|
| 23.344   | BM m | 0.64        | 38436.16 | 935.54 | 49.95 |
| 31.993   | BB   | 3.79        | 38513.62 | 680.62 | 50.05 |
| Sum      |      |             | 76949.77 |        |       |

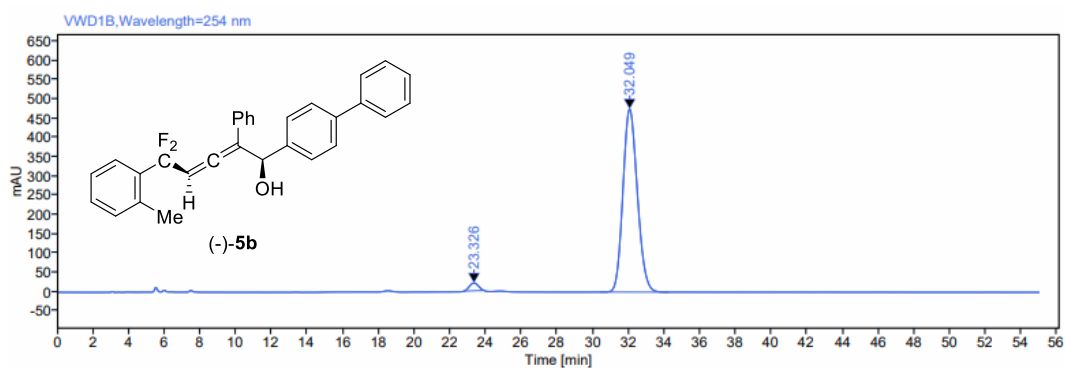

| RT [min] | Type | Width [min] | Area     | Height | Area% |
|----------|------|-------------|----------|--------|-------|
| 23.326   | BBA  | 1.11        | 698.50   | 20.14  | 2.55  |
| 32.049   | BBA  | 3.85        | 26652.41 | 475.15 | 97.45 |
| Sum      |      |             | 27350.91 |        |       |

**(-)-(1*R*,3*S*)-1-(4-chlorophenyl)-5,5-difluoro-2-phenyl-5-(*o*-tolyl)penta-2,3-dien-1-ol (5c)**

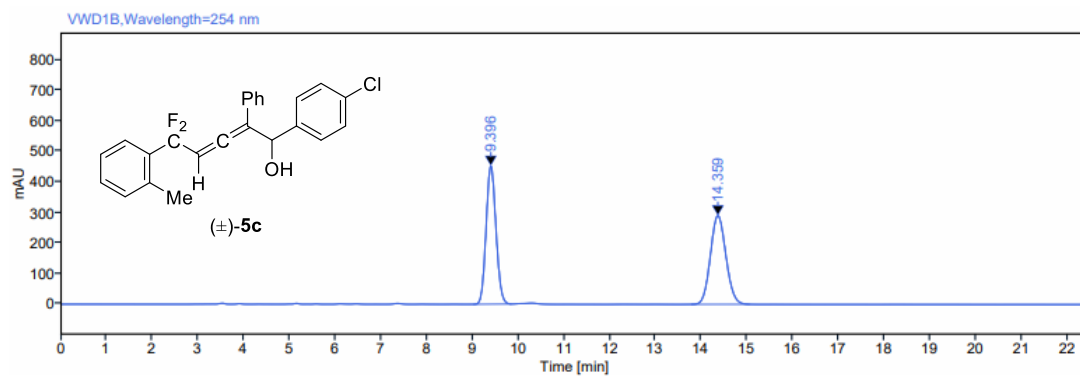

| RT [min] | Type | Width [min] | Area     | Height | Area% |
|----------|------|-------------|----------|--------|-------|
| 9.396    | BBA  | 0.83        | 6795.10  | 452.60 | 49.82 |
| 14.359   | BBA  | 1.28        | 6844.58  | 290.57 | 50.18 |
| Sum      |      |             | 13639.69 |        |       |

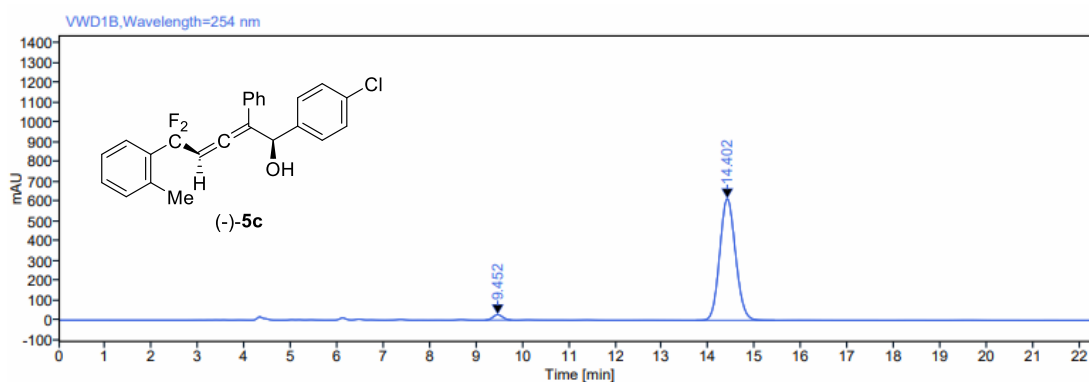

| RT [min] | Type | Width [min] | Area     | Height | Area% |
|----------|------|-------------|----------|--------|-------|
| 9.452    | BBA  | 0.57        | 394.85   | 26.99  | 2.63  |
| 14.402   | BBA  | 1.69        | 14590.71 | 614.21 | 97.37 |
| Sum      |      |             | 14985.56 |        |       |

**(-)-(1*R*,3*S*)-1-(4-bromophenyl)-5,5-difluoro-2-phenyl-5-(*o*-tolyl)penta-2,3-dien-1-ol (5d)**

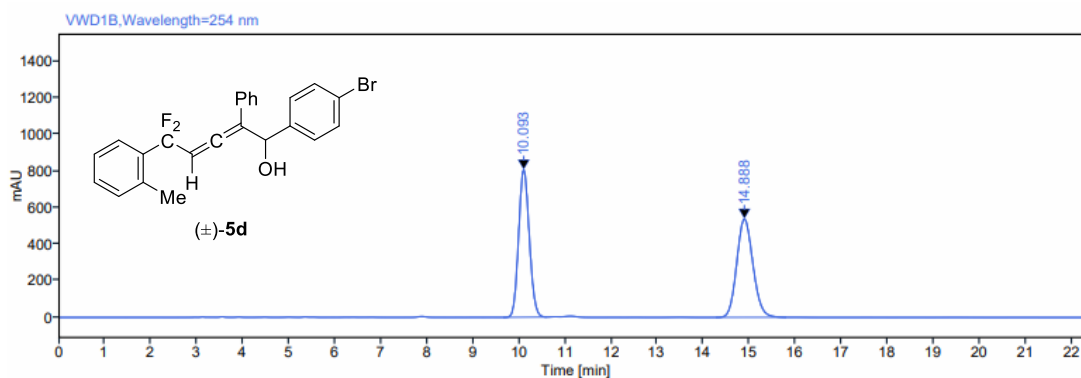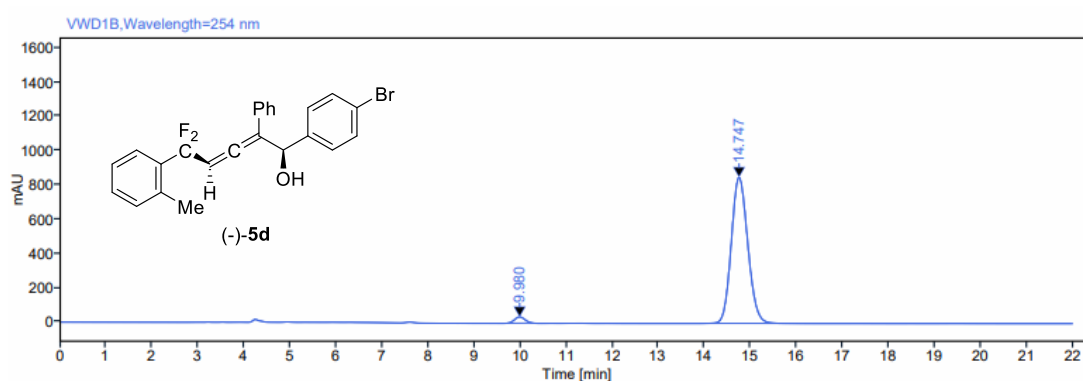

**(-)-(1*R*,3*S*)-5,5-difluoro-1-(4-methoxyphenyl)-2-phenyl-5-(*o*-tolyl)penta-2,3-dien-1-ol (5e)**

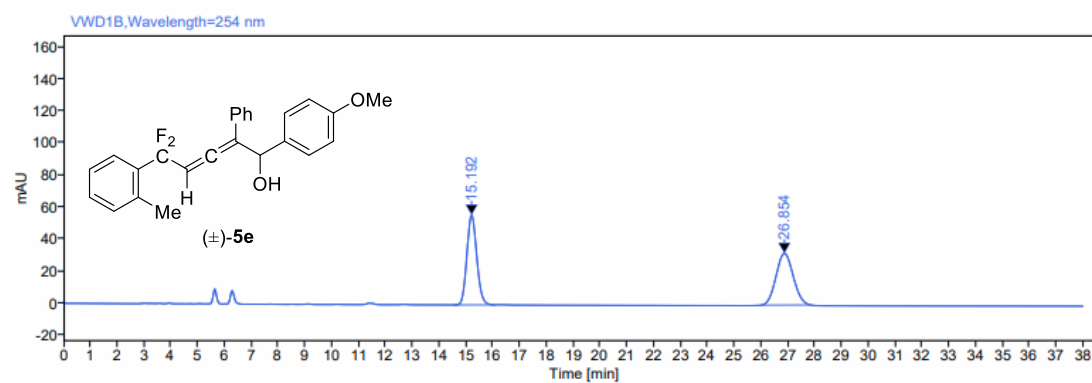

| RT [min] | Type | Width [min] | Area    | Height | Area% |
|----------|------|-------------|---------|--------|-------|
| 15.192   | BB   | 1.57        | 1435.43 | 56.13  | 49.98 |
| 26.854   | BBA  | 1.85        | 1436.75 | 32.31  | 50.02 |
| Sum      |      |             | 2872.18 |        |       |

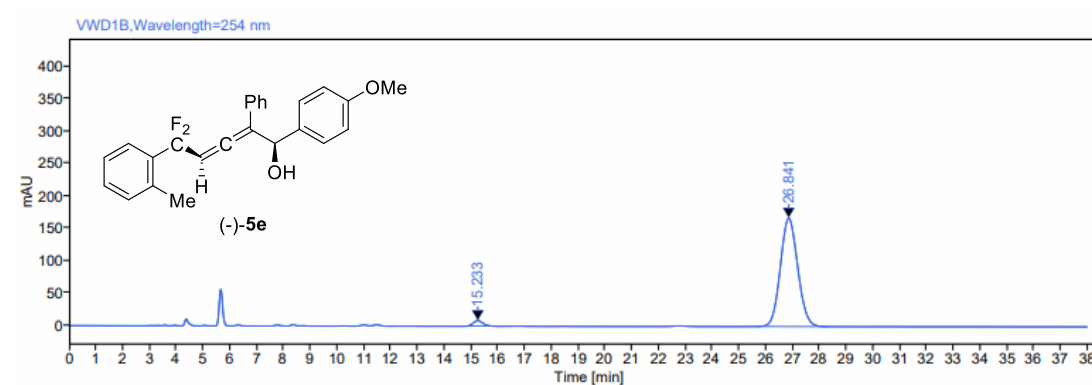

| RT [min] | Type | Width [min] | Area    | Height | Area% |
|----------|------|-------------|---------|--------|-------|
| 15.233   | BBA  | 0.87        | 196.45  | 8.28   | 2.54  |
| 26.841   | BBA  | 2.64        | 7529.74 | 167.21 | 97.46 |
| Sum      |      |             | 7726.19 |        |       |

**(-)-(1*S*,3*S*)-5,5-difluoro-2-phenyl-1-(thiophen-2-yl)-5-(*o*-tolyl)penta-2,3-dien-1-ol (5f)**

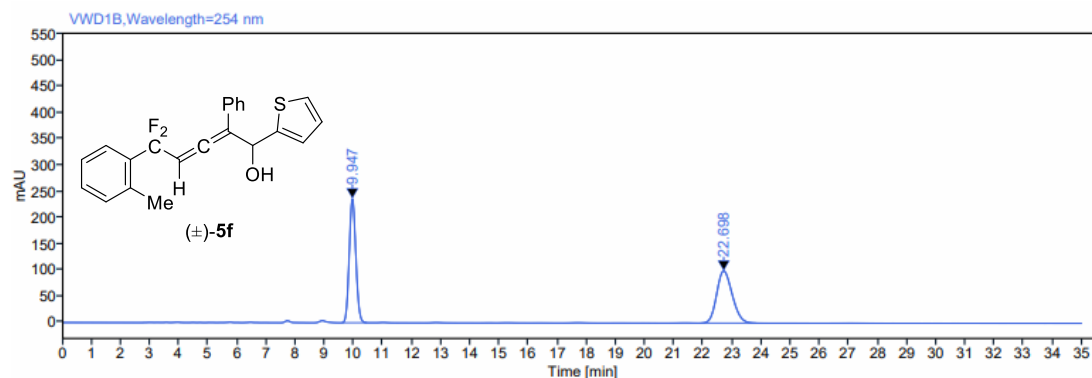

| RT [min] | Type | Width [min] | Area    | Height | Area% |
|----------|------|-------------|---------|--------|-------|
| 9.947    | BBA  | 0.85        | 3723.94 | 236.63 | 50.27 |
| 22.698   | BBA  | 1.87        | 3683.75 | 99.49  | 49.73 |
| Sum      |      |             | 7407.68 |        |       |

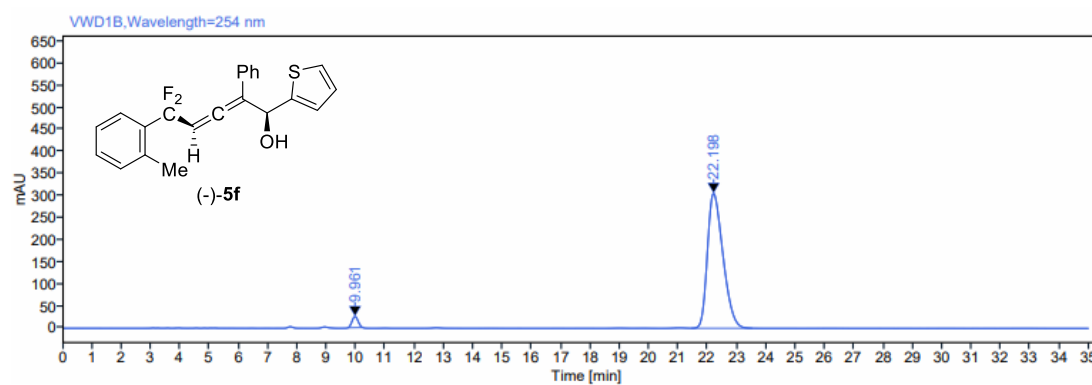

| RT [min] | Type | Width [min] | Area     | Height | Area% |
|----------|------|-------------|----------|--------|-------|
| 9.961    | BBA  | 0.51        | 364.43   | 25.31  | 3.13  |
| 22.198   | BBA  | 2.07        | 11280.52 | 305.52 | 96.87 |
| Sum      |      |             | 11644.94 |        |       |

**(-)-(1*S*,3*S*)-5,5-difluoro-1-(furan-2-yl)-2-phenyl-5-(*o*-tolyl)penta-2,3-dien-1-ol (5g)**

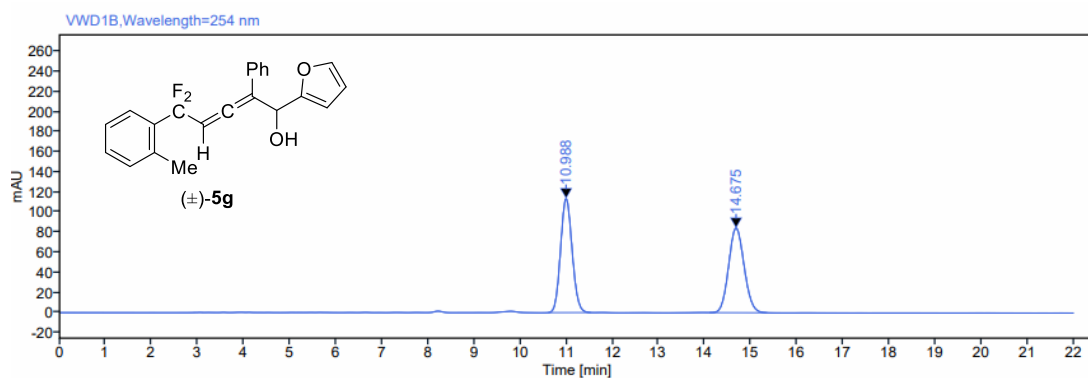

| RT [min] | Type | Width [min] | Area    | Height | Area% |
|----------|------|-------------|---------|--------|-------|
| 10.988   | BBA  | 0.92        | 1985.67 | 113.65 | 50.17 |
| 14.675   | BBA  | 1.25        | 1972.03 | 84.39  | 49.83 |
| Sum      |      |             | 3957.70 |        |       |

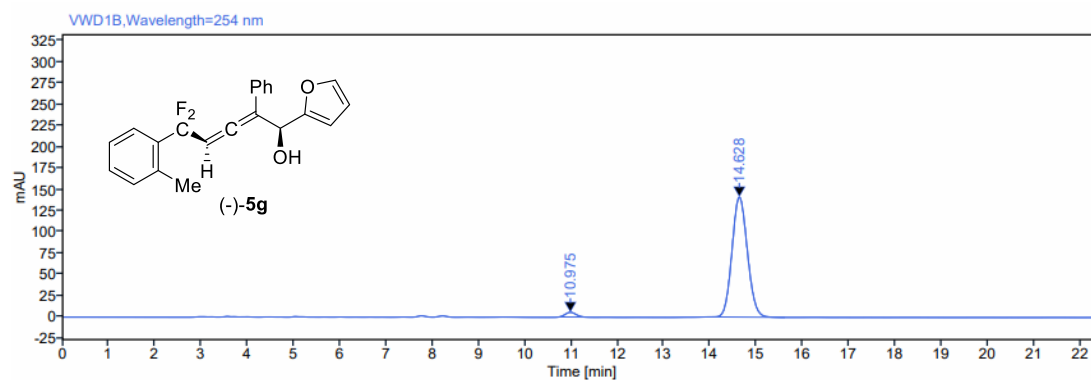

| RT [min] | Type | Width [min] | Area    | Height | Area% |
|----------|------|-------------|---------|--------|-------|
| 10.975   | BBA  | 0.56        | 87.49   | 5.49   | 2.61  |
| 14.628   | BBA  | 1.57        | 3266.12 | 141.13 | 97.39 |
| Sum      |      |             | 3353.60 |        |       |



**(-)-(3*R*,5*S*)-7,7-difluoro-1,4-diphenyl-7-(*o*-tolyl)hepta-4,5-dien-3-ol (5h)**

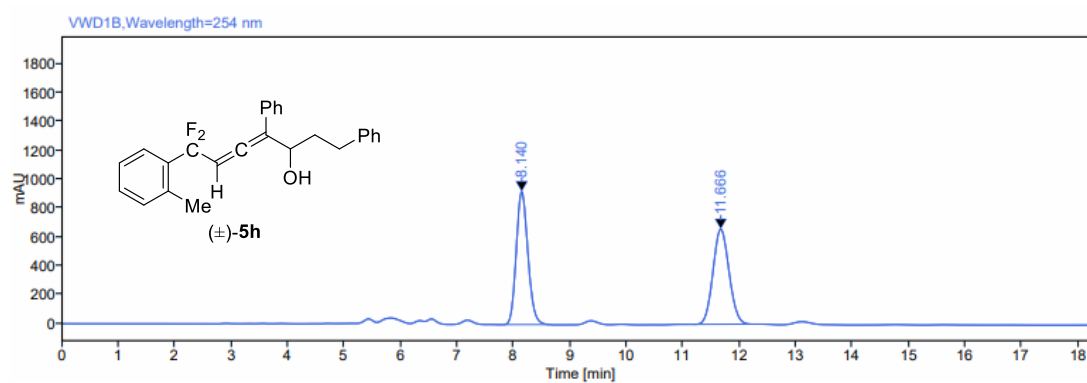

| RT [min] | Type | Width [min] | Area     | Height | Area% |
|----------|------|-------------|----------|--------|-------|
| 8.140    | BBA  | 0.79        | 13236.91 | 921.81 | 50.37 |
| 11.666   | BBA  | 1.01        | 13042.38 | 658.58 | 49.63 |
| Sum      |      |             | 26279.29 |        |       |

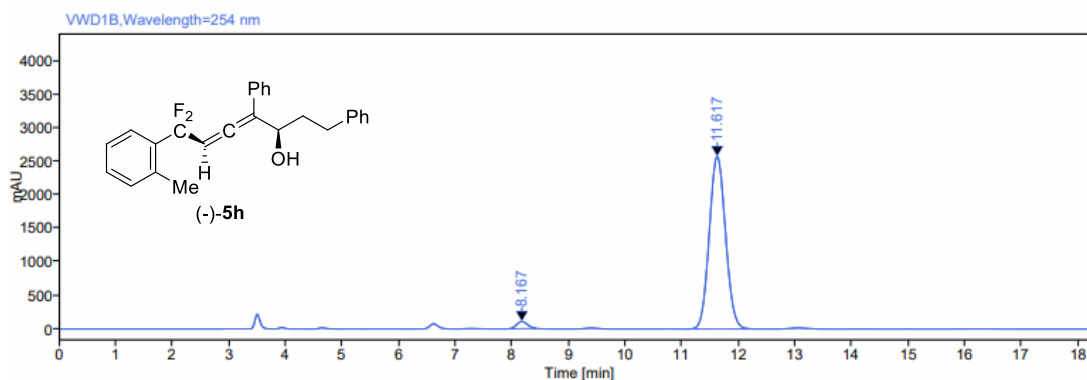

| RT [min] | Type | Width [min] | Area     | Height  | Area% |
|----------|------|-------------|----------|---------|-------|
| 8.167    | BBA  | 0.51        | 1419.24  | 106.82  | 2.68  |
| 11.617   | BBA  | 1.29        | 51573.75 | 2577.77 | 97.32 |
| Sum      |      |             | 52992.99 |         |       |

**(-)-(2*R*,4*S*)-6,6-difluoro-1,3-diphenyl-6-(*o*-tolyl)hexa-3,4-dien-2-ol (5i)**

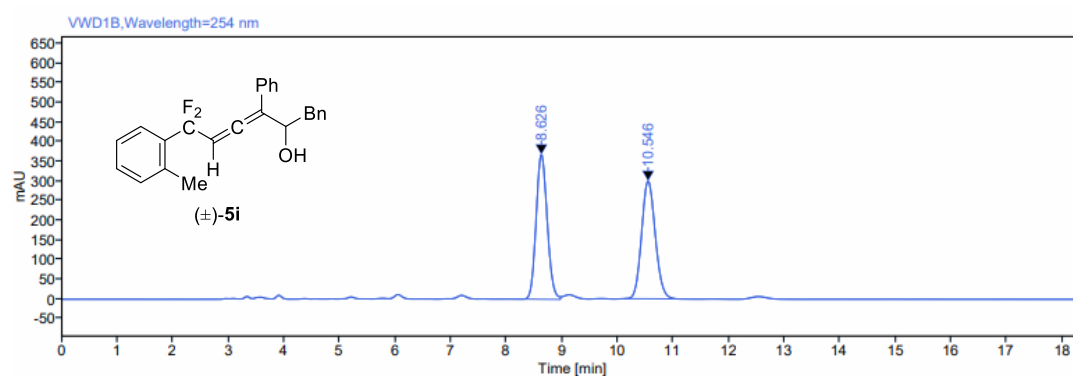

| RT [min] | Type | Width [min] | Area     | Height | Area% |
|----------|------|-------------|----------|--------|-------|
| 8.626    | BM m | 0.22        | 5113.66  | 368.14 | 49.91 |
| 10.546   | BBA  | 0.96        | 5133.08  | 299.73 | 50.09 |
| Sum      |      |             | 10246.74 |        |       |

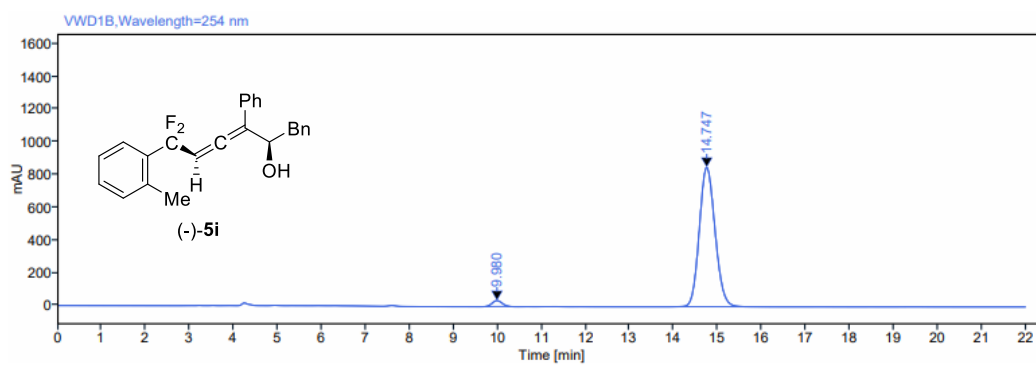

| RT [min] | Type | Width [min] | Area     | Height | Area% |
|----------|------|-------------|----------|--------|-------|
| 9.980    | BBA  | 0.57        | 564.01   | 36.23  | 2.59  |
| 14.747   | BBA  | 1.57        | 21217.57 | 852.05 | 97.41 |
| Sum      |      |             | 21781.59 |        |       |

**(-)-(1*R*,3*S*)-1-cyclopentyl-5,5-difluoro-2-phenyl-5-(*o*-tolyl)penta-2,3-dien-1-ol (5j)**

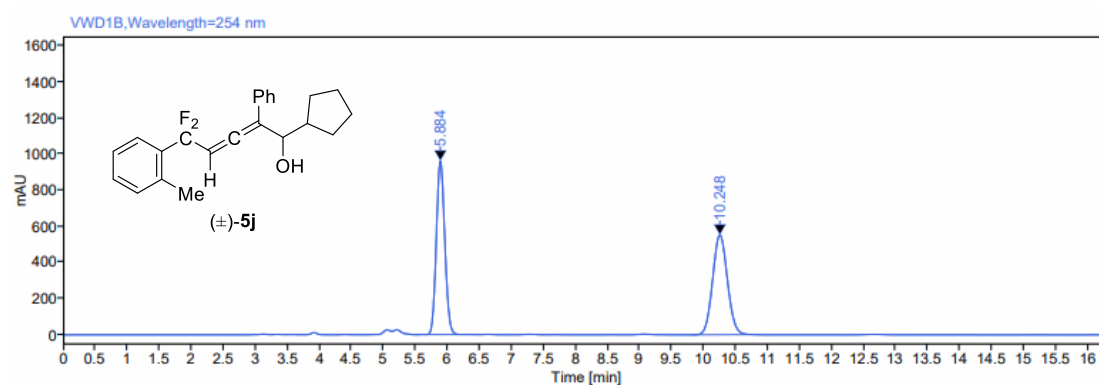

| RT [min] | Type | Width [min] | Area     | Height | Area% |
|----------|------|-------------|----------|--------|-------|
| 5.884    | BBA  | 0.67        | 8830.35  | 963.30 | 49.84 |
| 10.248   | BBA  | 0.95        | 8886.85  | 553.62 | 50.16 |
| Sum      |      |             | 17717.19 |        |       |

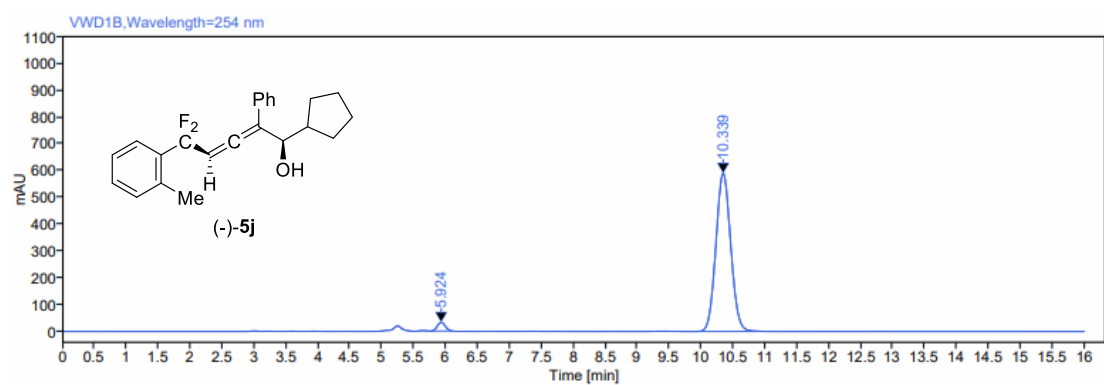

| RT [min] | Type | Width [min] | Area    | Height | Area% |
|----------|------|-------------|---------|--------|-------|
| 5.924    | BBA  | 0.33        | 280.47  | 32.18  | 2.86  |
| 10.339   | BBA  | 1.17        | 9539.85 | 590.60 | 97.14 |
| Sum      |      |             | 9820.32 |        |       |

**(-)-(2*R*,5*R*)-2-([1,1'-biphenyl]-4-yl)-5-(difluoro(*o*-tolyl)methyl)-3-phenyl-2,5-dihydrofuran (6)**

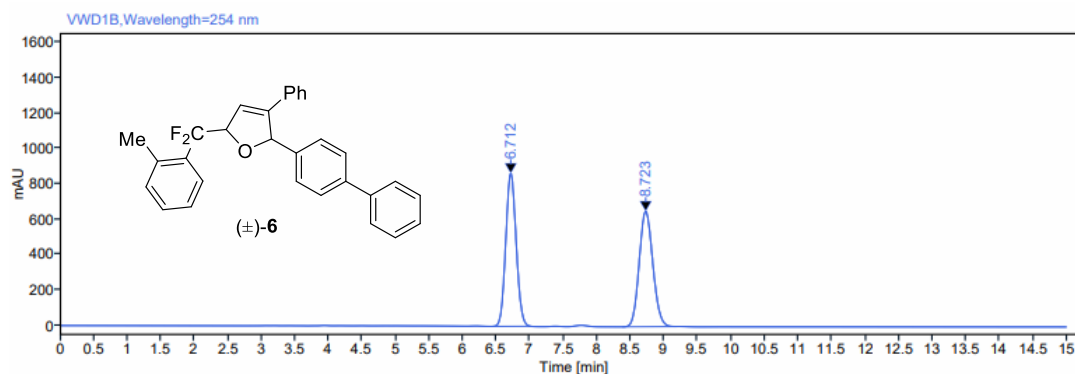

| RT [min] | Type | Width [min] | Area     | Height | Area% |
|----------|------|-------------|----------|--------|-------|
| 6.712    | BBA  | 0.57        | 9339.22  | 864.98 | 50.28 |
| 8.723    | BV   | 0.80        | 9234.14  | 652.65 | 49.72 |
| Sum      |      |             | 18573.36 |        |       |

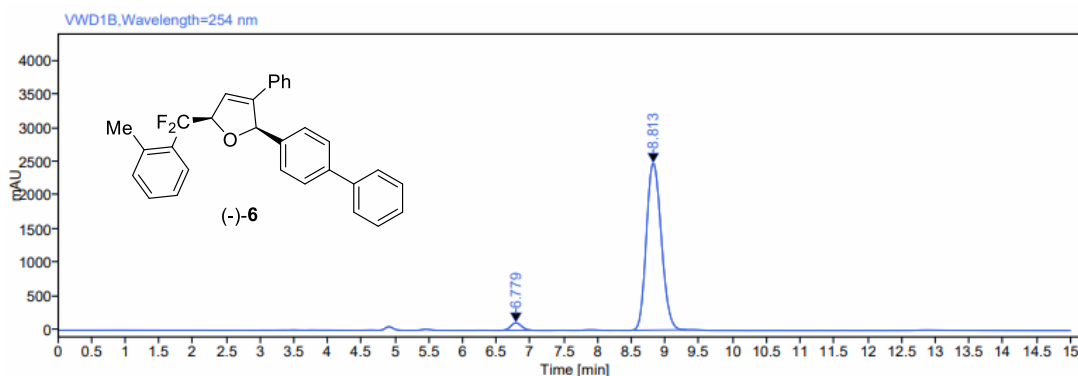

| RT [min] | Type | Width [min] | Area     | Height  | Area% |
|----------|------|-------------|----------|---------|-------|
| 6.779    | BBA  | 0.45        | 1212.62  | 110.87  | 3.07  |
| 8.813    | BB   | 0.85        | 38250.31 | 2480.41 | 96.93 |
| Sum      |      |             | 39462.93 |         |       |

**(-)-(2*S*,3*S*,5*R*)-2-([1,1'-biphenyl]-4-yl)-5-(difluoro(*o*-tolyl)methyl)-3-phenyltetrahydrofuran (7)**

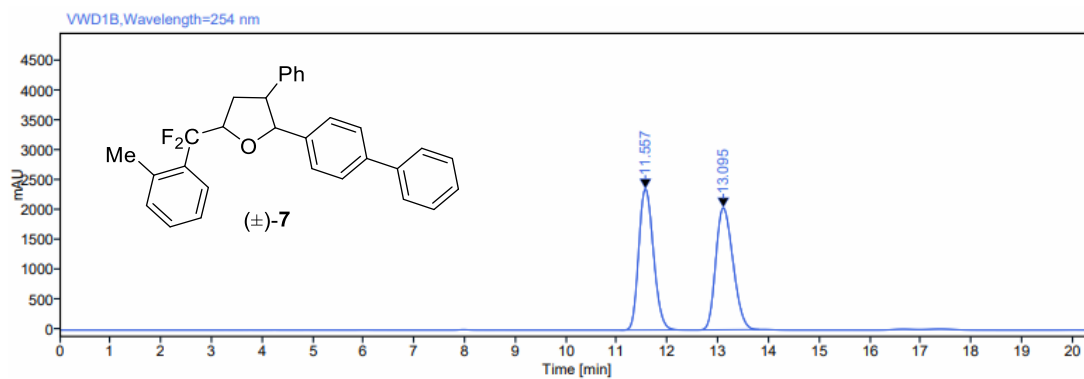

| RT [min] | Type | Width [min] | Area     | Height  | Area% |
|----------|------|-------------|----------|---------|-------|
| 11.557   | BBA  | 1.17        | 47741.55 | 2353.87 | 49.71 |
| 13.095   | BBA  | 1.16        | 48308.04 | 2035.45 | 50.29 |
| Sum      |      |             | 96049.59 |         |       |

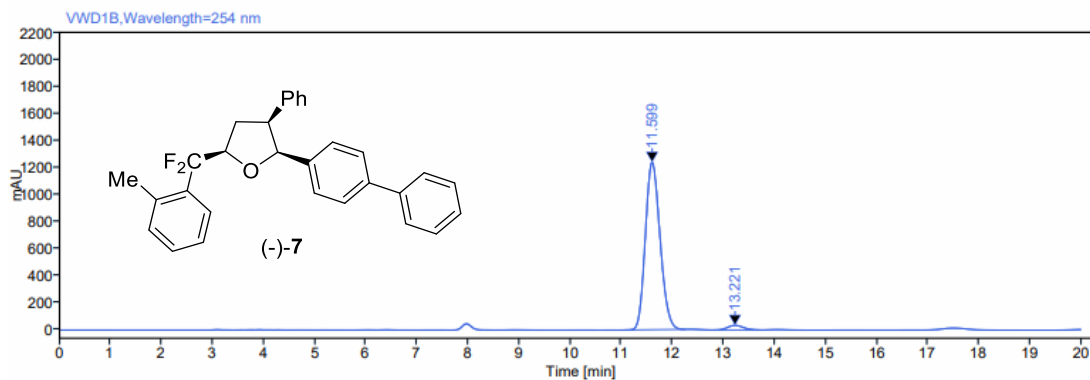

| RT [min] | Type | Width [min] | Area     | Height  | Area% |
|----------|------|-------------|----------|---------|-------|
| 11.599   | BB   | 1.19        | 24807.84 | 1237.81 | 97.13 |
| 13.221   | BBA  | 0.90        | 733.80   | 34.55   | 2.87  |
| Sum      |      |             | 25541.64 |         |       |

## 14. ECD Graph Computation

The theoretical ECD graph was computed by the following method.

1. Draw one conformer of the molecule.
2. Run molecular dynamics with GFN0-xTB<sup>4</sup> method using xTB<sup>5</sup> software under temperature 400 K and total simulation time 100 ps. Save molecular structure to a file every 50 fs.
3. Optimize the structures generated by molecular dynamics using crest<sup>6</sup> software. The conformers were optimized by GFN0-xTB method using xTB at 298.15 K.
4. Remove duplicated optimized structures using Molclus<sup>7</sup> software with energy threshold 0.5 kcal/mol and distance threshold 0.5 angstroms, and save the conformers.
5. Run DFT calculations for the conformers. The optimization and frequency calculations were carried out with the restricted PBE0<sup>8</sup> functional with D3BJ<sup>9</sup> dispersion correction and def2-SVP<sup>10</sup> basis set involving the solvation effect of chloroform using the SMD solvent model<sup>11</sup> in Gaussian 16<sup>12</sup> under 298.15 K. The duplicated structures were removed again after DFT optimizations.
6. Run TDDFT calculation and retrieve the ECD graph. The TDDFT calculations were carried out under the same theory level with the optimization. The 30 lowest energy excited states were calculated for each different conformer. The ECD graph for each conformer were generated by GaussView<sup>13</sup> and exported to a text file.
7. Retrieve the final ECD graph. The final graph was calculated by the weighted average of graphs for each conformer. The weight was calculated by Boltzmann distribution with the Gibbs energy value from frequency calculations. The graph was generated by matplotlib<sup>14</sup> in python.

The optimized structures can be found in the supporting information as an xyz file.

## 15. References

- 
- 1 W. L. F. Armarego and C. L. L. Chai, *Purification of Laboratory Chemicals-Six Edition*, London: Elsevier Inc., 2009.
  - 2 (a) S.-H. Ueng, M. Makhlof Brahmi, É. Derat, L. Fensterbank, E. Lacôte, M. Malacria and D. P. Curran, *J. Am. Chem. Soc.* 2008, **130**, 10082–10083. (b) Y. Pang, Q. He, Z.-Q. Li, J.-M. Yang, J.-H. Yu, S.-F. Zhu and Q.-L. Zhou, *J. Am. Chem. Soc.* 2018, **140**, 10663–10668.

- 
- 3 (a) J. T. DePinto, W. A. deProphetis, J. L. Menke and R. J. McMahon, *J. Am. Chem. Soc.* 2007, **129**, 2308–2315.  
(b) M.-T. Hsieh, K.-H. Lee, S.-C. Kuo and H.-C. Lin, *Adv. Synth. Catal.* 2018, **360**, 1605–1610.
- 4 S. Grimme, C. Bannwarth and P. Shushkov, *J. Chem. Theory Comput.* 2017, **13**, 1989–2009.
- 5 C. Bannwarth, E. Caldeweyher, S. Ehlert, A. Hansen, P. Pracht, J. Seibert, S. Spicher and S. Grimme, *WIREs Comput. Mol. Sci.* 2020, **11**, e01493.
- 6 P. Pracht, F. Bohle and S. Grimme, *Phys. Chem. Chem. Phys.* 2020, **22**, 7169–7192.
- 7 T. Lu, Molclus program, Version 1.9.9.9, <http://www.keinsci.com/research/molclus.html> (accessed March 30th, 2023)
- 8 C. Adamo and V. Barone, *J. Chem. Phys.*, 1999, **110**, 6158–6170.
- 9 S. Grimme, J. Antony, S. Ehrlich and H. Krieg, *J. Chem. Phys.* 2010, **132**, 154104.
- 10 F. Weigend and R. Ahlrichs, *Phys. Chem. Chem. Phys.* 2005, **7**, 3297–3305.
- 11 A. V. Marenich, C. J. Cramer, D. G. Truhlar, *J. Phys. Chem. B.* 2009, **113**, 6378–6396.
- 12 Gaussian 16, Revision A.03, M. J. Frisch, G. W. Trucks, H. B. Schlegel, G. E. Scuseria, M. A. Robb, J. R. Cheeseman, G. Scalmani, V. Barone, G. A. Petersson, H. Nakatsuji, X. Li, M. Caricato, A. V. Marenich, J. Bloino, B. G. Janesko, R. Gomperts, B. Mennucci, H. P. Hratchian, J. V. Ortiz, A. F. Izmaylov, J. L. Sonnenberg, D. Williams-Young, F. Ding, F. Lipparini, F. Egidi, J. Goings, B. Peng, A. Petrone, T. Henderson, D. Ranasinghe, V. G. Zakrzewski, J. Gao, N. Rega, G. Zheng, W. Liang, M. Hada, M. Ehara, K. Toyota, R. Fukuda, J. Hasegawa, M. Ishida, T. Nakajima, Y. Honda, O. Kitao, H. Nakai, T. Vreven, K. Throssell, J. A. Montgomery, J. E. Peralta, F. Ogliaro, M. J. Bearpark, J. J. Heyd, E. N. Brothers, K. N. Kudin, V. N. Staroverov, T. A. Keith, R. Kobayashi, J. Normand, K. Raghavachari, A. P. Rendell, J. C. Burant, S. S. Iyengar, J. Tomasi, M. Cossi, J. M. Millam, M. Klene, C. Adamo, R. Cammi, J. W. Ochterski, R. L. Martin, K. Morokuma, O. Farkas, J. B. Foresman and D. J. Fox, *Gaussian, Inc.*, Wallingford CT, 2016.
- 13 GaussView, Version 6, R. Dennington, T. Keith and J. Millam, *Semichem Inc.*, Shawnee Mission, KS, 2016.
- 14 J. D. Hunter, *Computing in Science & Engineering*, 2007, **9**, 90–95.
